# Supplementary material for: Microfluidics on liquid handling stations (μF-on-LHS): an industry compatible chip interface between microfluidics and automated liquid handling stations
Source: Royal Society of Chemistry journal article supplement (doi:10.1039/c3lc00042g), 2013-01-01
Supplement: c3lc00042g.stp [file c3lc00042g.stp]

ISO-10303-21
HEADER
FILE_DESCRIPTION( ( 'Unknown' ), '1' )
FILE_NAME( 'W:/Arbeitsbackup20121130/Projekt 10-871/_ISO_Projektmanagement/Fach24_CAD/Pipettierroboter/Bottom_part.stp', 'Unknown', ( 'Unknown' ), ( 'Unknown' ), 'XStep 1.0', 'Unknown', ' ' )
FILE_SCHEMA( ( 'CONFIG_CONTROL_DESIGN' ) )
ENDSEC
DATA
#1 = DESIGN_CONTEXT( '', #27, 'design' )
#2 = APPLICATION_PROTOCOL_DEFINITION( 'INTERNATIONAL STANDARD', 'config_control_design', 1994, #27 )
#3 = PRODUCT_CATEGORY_RELATIONSHIP( 'NONE', 'NONE', #28, #29 )
#4 = DATE_AND_TIME( #30, #31 )
#5 = DATE_TIME_ROLE( 'creation_date' )
#6 = DATE_TIME_ROLE( 'classification_date' )
#7 = PERSON_AND_ORGANIZATION_ROLE( 'creator' )
#8 = PERSON_AND_ORGANIZATION_ROLE( 'design_supplier' )
#9 = PERSON_AND_ORGANIZATION_ROLE( 'classification_officer' )
#10 = PERSON_AND_ORGANIZATION_ROLE( 'design_owner' )
#11 = APPROVAL_PERSON_ORGANIZATION( #32, #33, #34 )
#12 = APPROVAL_DATE_TIME( #4, #33 )
#13 = CC_DESIGN_APPROVAL( #33, ( #35, #36, #37 ) )
#14 = CC_DESIGN_DATE_AND_TIME_ASSIGNMENT( #4, #5, ( #37 ) )
#15 = CC_DESIGN_DATE_AND_TIME_ASSIGNMENT( #4, #6, ( #35 ) )
#16 = CC_DESIGN_PERSON_AND_ORGANIZATION_ASSIGNMENT( #32, #10, ( #38 ) )
#17 = CC_DESIGN_PERSON_AND_ORGANIZATION_ASSIGNMENT( #32, #7, ( #37 ) )
#18 = CC_DESIGN_PERSON_AND_ORGANIZATION_ASSIGNMENT( #32, #7, ( #36 ) )
#19 = CC_DESIGN_PERSON_AND_ORGANIZATION_ASSIGNMENT( #32, #8, ( #36 ) )
#20 = CC_DESIGN_SECURITY_CLASSIFICATION( #35, ( #36 ) )
#21 = CC_DESIGN_PERSON_AND_ORGANIZATION_ASSIGNMENT( #32, #9, ( #35 ) )
#22 = SHAPE_DEFINITION_REPRESENTATION( #39, #40 )
#23 = ( GEOMETRIC_REPRESENTATION_CONTEXT( 3 )GLOBAL_UNCERTAINTY_ASSIGNED_CONTEXT( ( #43 ) )GLOBAL_UNIT_ASSIGNED_CONTEXT( ( #45, #46, #47 ) )REPRESENTATION_CONTEXT( 'NONE', 'WORKSPACE' ) )
#27 = APPLICATION_CONTEXT( 'CONFIGURATION CONTROLLED 3D DESIGNS OF MECHANICAL PARTS AND ASSEMBLIES' )
#28 = PRODUCT_CATEGORY( 'part', 'NONE' )
#29 = PRODUCT_RELATED_PRODUCT_CATEGORY( 'detail', ' ', ( #38 ) )
#30 = CALENDAR_DATE( 2012, 6, 11 )
#31 = LOCAL_TIME( 10, 18, 3.00000000000000, #49 )
#32 = PERSON_AND_ORGANIZATION( #50, #51 )
#33 = APPROVAL( #52, 'SOLID MODEL' )
#34 = APPROVAL_ROLE( 'APPROVED' )
#35 = SECURITY_CLASSIFICATION( '', '', #53 )
#36 = PRODUCT_DEFINITION_FORMATION_WITH_SPECIFIED_SOURCE( ' ', 'NONE', #38, .NOT_KNOWN. )
#37 = PRODUCT_DEFINITION( 'NONE', 'NONE', #36, #1 )
#38 = PRODUCT( '1', '1', 'PART-1-DESC', ( #54 ) )
#39 = PRODUCT_DEFINITION_SHAPE( 'NONE', 'NONE', #37 )
#40 = ADVANCED_BREP_SHAPE_REPRESENTATION( '1', ( #55, #56 ), #23 )
#43 = UNCERTAINTY_MEASURE_WITH_UNIT( LENGTH_MEASURE( 0.00100000000000000 ), #45, '', '' )
#45 = ( CONVERSION_BASED_UNIT( 'MILLIMETRE', #59 )LENGTH_UNIT( )NAMED_UNIT( #62 ) )
#46 = ( NAMED_UNIT( #64 )PLANE_ANGLE_UNIT( )SI_UNIT( $, .RADIAN. ) )
#47 = ( NAMED_UNIT( #64 )SOLID_ANGLE_UNIT( )SI_UNIT( $, .STERADIAN. ) )
#49 = COORDINATED_UNIVERSAL_TIME_OFFSET( 1, 0, .AHEAD. )
#50 = PERSON( '', 'UNSPECIFIED', $, $, $, $ )
#51 = ORGANIZATION( 'UNSPECIFIED', 'UNSPECIFIED', 'UNSPECIFIED' )
#52 = APPROVAL_STATUS( 'approved' )
#53 = SECURITY_CLASSIFICATION_LEVEL( 'unclassified' )
#54 = MECHANICAL_CONTEXT( '', #27, 'mechanical' )
#55 = MANIFOLD_SOLID_BREP( '1', #70 )
#56 = AXIS2_PLACEMENT_3D( '', #71, #72, #73 )
#59 = LENGTH_MEASURE_WITH_UNIT( LENGTH_MEASURE( 1.00000000000000 ), #74 )
#62 = DIMENSIONAL_EXPONENTS( 1.00000000000000, 0.000000000000000, 0.000000000000000, 0.000000000000000, 0.000000000000000, 0.000000000000000, 0.000000000000000 )
#64 = DIMENSIONAL_EXPONENTS( 0.000000000000000, 0.000000000000000, 0.000000000000000, 0.000000000000000, 0.000000000000000, 0.000000000000000, 0.000000000000000 )
#70 = CLOSED_SHELL( '', ( #75, #76, #77, #78, #79, #80, #81, #82, #83, #84, #85, #86, #87, #88, #89, #90, #91, #92, #93, #94, #95, #96, #97, #98 ) )
#71 = CARTESIAN_POINT( '', ( 0.000000000000000, 0.000000000000000, 0.000000000000000 ) )
#72 = DIRECTION( '', ( 0.000000000000000, 0.000000000000000, 1.00000000000000 ) )
#73 = DIRECTION( '', ( 1.00000000000000, 0.000000000000000, 0.000000000000000 ) )
#74 = ( NAMED_UNIT( #62 )LENGTH_UNIT( )SI_UNIT( .MILLI., .METRE. ) )
#75 = ADVANCED_FACE( '', ( #100, #101, #102, #103, #104 ), #105, .F. )
#76 = ADVANCED_FACE( '', ( #106 ), #107, .F. )
#77 = ADVANCED_FACE( '', ( #108 ), #109, .F. )
#78 = ADVANCED_FACE( '', ( #110 ), #111, .F. )
#79 = ADVANCED_FACE( '', ( #112, #113, #114, #115, #116 ), #117, .T. )
#80 = ADVANCED_FACE( '', ( #118 ), #119, .T. )
#81 = ADVANCED_FACE( '', ( #120 ), #121, .F. )
#82 = ADVANCED_FACE( '', ( #122 ), #123, .F. )
#83 = ADVANCED_FACE( '', ( #124, #125 ), #126, .F. )
#84 = ADVANCED_FACE( '', ( #127, #128 ), #129, .F. )
#85 = ADVANCED_FACE( '', ( #130 ), #131, .F. )
#86 = ADVANCED_FACE( '', ( #132 ), #133, .F. )
#87 = ADVANCED_FACE( '', ( #134 ), #135, .F. )
#88 = ADVANCED_FACE( '', ( #136, #137 ), #138, .F. )
#89 = ADVANCED_FACE( '', ( #139, #140 ), #141, .F. )
#90 = ADVANCED_FACE( '', ( #142, #143 ), #144, .F. )
#91 = ADVANCED_FACE( '', ( #145 ), #146, .F. )
#92 = ADVANCED_FACE( '', ( #147, #148 ), #149, .F. )
#93 = ADVANCED_FACE( '', ( #150, #151 ), #152, .F. )
#94 = ADVANCED_FACE( '', ( #153, #154 ), #155, .F. )
#95 = ADVANCED_FACE( '', ( #156, #157 ), #158, .F. )
#96 = ADVANCED_FACE( '', ( #159, #160 ), #161, .F. )
#97 = ADVANCED_FACE( '', ( #162, #163 ), #164, .F. )
#98 = ADVANCED_FACE( '', ( #165, #166 ), #167, .F. )
#100 = FACE_BOUND( '', #168, .T. )
#101 = FACE_BOUND( '', #169, .T. )
#102 = FACE_OUTER_BOUND( '', #170, .T. )
#103 = FACE_BOUND( '', #171, .T. )
#104 = FACE_BOUND( '', #172, .T. )
#105 = PLANE( '', #173 )
#106 = FACE_OUTER_BOUND( '', #174, .T. )
#107 = PLANE( '', #175 )
#108 = FACE_OUTER_BOUND( '', #176, .T. )
#109 = PLANE( '', #177 )
#110 = FACE_OUTER_BOUND( '', #178, .T. )
#111 = PLANE( '', #179 )
#112 = FACE_OUTER_BOUND( '', #180, .T. )
#113 = FACE_BOUND( '', #181, .T. )
#114 = FACE_BOUND( '', #182, .T. )
#115 = FACE_BOUND( '', #183, .T. )
#116 = FACE_BOUND( '', #184, .T. )
#117 = PLANE( '', #185 )
#118 = FACE_OUTER_BOUND( '', #186, .T. )
#119 = PLANE( '', #187 )
#120 = FACE_OUTER_BOUND( '', #188, .T. )
#121 = CYLINDRICAL_SURFACE( '', #189, 2.50000000000000 )
#122 = FACE_OUTER_BOUND( '', #190, .T. )
#123 = CYLINDRICAL_SURFACE( '', #191, 2.50000000000000 )
#124 = FACE_BOUND( '', #192, .T. )
#125 = FACE_OUTER_BOUND( '', #193, .T. )
#126 = PLANE( '', #194 )
#127 = FACE_OUTER_BOUND( '', #195, .T. )
#128 = FACE_OUTER_BOUND( '', #196, .T. )
#129 = CYLINDRICAL_SURFACE( '', #197, 2.25000000000000 )
#130 = FACE_OUTER_BOUND( '', #198, .T. )
#131 = PLANE( '', #199 )
#132 = FACE_OUTER_BOUND( '', #200, .T. )
#133 = PLANE( '', #201 )
#134 = FACE_OUTER_BOUND( '', #202, .T. )
#135 = PLANE( '', #203 )
#136 = FACE_OUTER_BOUND( '', #204, .T. )
#137 = FACE_OUTER_BOUND( '', #205, .T. )
#138 = CYLINDRICAL_SURFACE( '', #206, 2.25000000000000 )
#139 = FACE_OUTER_BOUND( '', #207, .T. )
#140 = FACE_OUTER_BOUND( '', #208, .T. )
#141 = CYLINDRICAL_SURFACE( '', #209, 2.25000000000000 )
#142 = FACE_OUTER_BOUND( '', #210, .T. )
#143 = FACE_OUTER_BOUND( '', #211, .T. )
#144 = CYLINDRICAL_SURFACE( '', #212, 2.25000000000000 )
#145 = FACE_OUTER_BOUND( '', #213, .T. )
#146 = PLANE( '', #214 )
#147 = FACE_OUTER_BOUND( '', #215, .T. )
#148 = FACE_OUTER_BOUND( '', #216, .T. )
#149 = CYLINDRICAL_SURFACE( '', #217, 4.00000000000000 )
#150 = FACE_BOUND( '', #218, .T. )
#151 = FACE_OUTER_BOUND( '', #219, .T. )
#152 = PLANE( '', #220 )
#153 = FACE_OUTER_BOUND( '', #221, .T. )
#154 = FACE_OUTER_BOUND( '', #222, .T. )
#155 = CYLINDRICAL_SURFACE( '', #223, 4.00000000000000 )
#156 = FACE_BOUND( '', #224, .T. )
#157 = FACE_OUTER_BOUND( '', #225, .T. )
#158 = PLANE( '', #226 )
#159 = FACE_OUTER_BOUND( '', #227, .T. )
#160 = FACE_OUTER_BOUND( '', #228, .T. )
#161 = CYLINDRICAL_SURFACE( '', #229, 4.00000000000000 )
#162 = FACE_BOUND( '', #230, .T. )
#163 = FACE_OUTER_BOUND( '', #231, .T. )
#164 = PLANE( '', #232 )
#165 = FACE_OUTER_BOUND( '', #233, .T. )
#166 = FACE_OUTER_BOUND( '', #234, .T. )
#167 = CYLINDRICAL_SURFACE( '', #235, 4.00000000000000 )
#168 = EDGE_LOOP( '', ( #236 ) )
#169 = EDGE_LOOP( '', ( #237 ) )
#170 = EDGE_LOOP( '', ( #238, #239, #240, #241 ) )
#171 = EDGE_LOOP( '', ( #242 ) )
#172 = EDGE_LOOP( '', ( #243 ) )
#173 = AXIS2_PLACEMENT_3D( '', #244, #245, #246 )
#174 = EDGE_LOOP( '', ( #247, #248, #249, #250 ) )
#175 = AXIS2_PLACEMENT_3D( '', #251, #252, #253 )
#176 = EDGE_LOOP( '', ( #254, #255, #256, #257 ) )
#177 = AXIS2_PLACEMENT_3D( '', #258, #259, #260 )
#178 = EDGE_LOOP( '', ( #261, #262, #263, #264, #265, #266, #267, #268 ) )
#179 = AXIS2_PLACEMENT_3D( '', #269, #270, #271 )
#180 = EDGE_LOOP( '', ( #272, #273, #274, #275, #276, #277, #278, #279, #280, #281 ) )
#181 = EDGE_LOOP( '', ( #282 ) )
#182 = EDGE_LOOP( '', ( #283 ) )
#183 = EDGE_LOOP( '', ( #284 ) )
#184 = EDGE_LOOP( '', ( #285 ) )
#185 = AXIS2_PLACEMENT_3D( '', #286, #287, #288 )
#186 = EDGE_LOOP( '', ( #289, #290, #291, #292, #293, #294 ) )
#187 = AXIS2_PLACEMENT_3D( '', #295, #296, #297 )
#188 = EDGE_LOOP( '', ( #298, #299, #300, #301 ) )
#189 = AXIS2_PLACEMENT_3D( '', #302, #303, #304 )
#190 = EDGE_LOOP( '', ( #305, #306, #307, #308 ) )
#191 = AXIS2_PLACEMENT_3D( '', #309, #310, #311 )
#192 = EDGE_LOOP( '', ( #312 ) )
#193 = EDGE_LOOP( '', ( #313 ) )
#194 = AXIS2_PLACEMENT_3D( '', #314, #315, #316 )
#195 = EDGE_LOOP( '', ( #317 ) )
#196 = EDGE_LOOP( '', ( #318 ) )
#197 = AXIS2_PLACEMENT_3D( '', #319, #320, #321 )
#198 = EDGE_LOOP( '', ( #322, #323, #324, #325 ) )
#199 = AXIS2_PLACEMENT_3D( '', #326, #327, #328 )
#200 = EDGE_LOOP( '', ( #329, #330, #331, #332 ) )
#201 = AXIS2_PLACEMENT_3D( '', #333, #334, #335 )
#202 = EDGE_LOOP( '', ( #336, #337, #338, #339 ) )
#203 = AXIS2_PLACEMENT_3D( '', #340, #341, #342 )
#204 = EDGE_LOOP( '', ( #343 ) )
#205 = EDGE_LOOP( '', ( #344 ) )
#206 = AXIS2_PLACEMENT_3D( '', #345, #346, #347 )
#207 = EDGE_LOOP( '', ( #348 ) )
#208 = EDGE_LOOP( '', ( #349 ) )
#209 = AXIS2_PLACEMENT_3D( '', #350, #351, #352 )
#210 = EDGE_LOOP( '', ( #353 ) )
#211 = EDGE_LOOP( '', ( #354 ) )
#212 = AXIS2_PLACEMENT_3D( '', #355, #356, #357 )
#213 = EDGE_LOOP( '', ( #358, #359, #360, #361 ) )
#214 = AXIS2_PLACEMENT_3D( '', #362, #363, #364 )
#215 = EDGE_LOOP( '', ( #365 ) )
#216 = EDGE_LOOP( '', ( #366 ) )
#217 = AXIS2_PLACEMENT_3D( '', #367, #368, #369 )
#218 = EDGE_LOOP( '', ( #370 ) )
#219 = EDGE_LOOP( '', ( #371 ) )
#220 = AXIS2_PLACEMENT_3D( '', #372, #373, #374 )
#221 = EDGE_LOOP( '', ( #375 ) )
#222 = EDGE_LOOP( '', ( #376 ) )
#223 = AXIS2_PLACEMENT_3D( '', #377, #378, #379 )
#224 = EDGE_LOOP( '', ( #380 ) )
#225 = EDGE_LOOP( '', ( #381 ) )
#226 = AXIS2_PLACEMENT_3D( '', #382, #383, #384 )
#227 = EDGE_LOOP( '', ( #385 ) )
#228 = EDGE_LOOP( '', ( #386 ) )
#229 = AXIS2_PLACEMENT_3D( '', #387, #388, #389 )
#230 = EDGE_LOOP( '', ( #390 ) )
#231 = EDGE_LOOP( '', ( #391 ) )
#232 = AXIS2_PLACEMENT_3D( '', #392, #393, #394 )
#233 = EDGE_LOOP( '', ( #395 ) )
#234 = EDGE_LOOP( '', ( #396 ) )
#235 = AXIS2_PLACEMENT_3D( '', #397, #398, #399 )
#236 = ORIENTED_EDGE( '', *, *, #400, .T. )
#237 = ORIENTED_EDGE( '', *, *, #401, .T. )
#238 = ORIENTED_EDGE( '', *, *, #402, .F. )
#239 = ORIENTED_EDGE( '', *, *, #403, .F. )
#240 = ORIENTED_EDGE( '', *, *, #404, .F. )
#241 = ORIENTED_EDGE( '', *, *, #405, .F. )
#242 = ORIENTED_EDGE( '', *, *, #406, .T. )
#243 = ORIENTED_EDGE( '', *, *, #407, .T. )
#244 = CARTESIAN_POINT( '', ( -35.6107784431138, 80.8239520958084, 0.000000000000000 ) )
#245 = DIRECTION( '', ( 0.000000000000000, 0.000000000000000, 1.00000000000000 ) )
#246 = DIRECTION( '', ( 1.00000000000000, 0.000000000000000, 0.000000000000000 ) )
#247 = ORIENTED_EDGE( '', *, *, #402, .T. )
#248 = ORIENTED_EDGE( '', *, *, #408, .F. )
#249 = ORIENTED_EDGE( '', *, *, #409, .F. )
#250 = ORIENTED_EDGE( '', *, *, #410, .T. )
#251 = CARTESIAN_POINT( '', ( 102.389221556886, 80.8239520958084, 8.00000000000000 ) )
#252 = DIRECTION( '', ( 1.00563679766771E-016, -1.00000000000000, 0.000000000000000 ) )
#253 = DIRECTION( '', ( 1.00000000000000, 1.00563679766771E-016, 0.000000000000000 ) )
#254 = ORIENTED_EDGE( '', *, *, #411, .T. )
#255 = ORIENTED_EDGE( '', *, *, #412, .F. )
#256 = ORIENTED_EDGE( '', *, *, #413, .F. )
#257 = ORIENTED_EDGE( '', *, *, #414, .T. )
#258 = CARTESIAN_POINT( '', ( 97.3892215568862, 70.8239520958084, 3.00000000000000 ) )
#259 = DIRECTION( '', ( 0.000000000000000, 1.00000000000000, 0.000000000000000 ) )
#260 = DIRECTION( '', ( 0.000000000000000, 0.000000000000000, 1.00000000000000 ) )
#261 = ORIENTED_EDGE( '', *, *, #415, .F. )
#262 = ORIENTED_EDGE( '', *, *, #412, .T. )
#263 = ORIENTED_EDGE( '', *, *, #416, .F. )
#264 = ORIENTED_EDGE( '', *, *, #408, .T. )
#265 = ORIENTED_EDGE( '', *, *, #405, .T. )
#266 = ORIENTED_EDGE( '', *, *, #417, .F. )
#267 = ORIENTED_EDGE( '', *, *, #418, .F. )
#268 = ORIENTED_EDGE( '', *, *, #419, .T. )
#269 = CARTESIAN_POINT( '', ( -35.6107784431138, 80.8239520958084, 8.00000000000000 ) )
#270 = DIRECTION( '', ( 1.00000000000000, 1.30922526488816E-016, 0.000000000000000 ) )
#271 = DIRECTION( '', ( -1.30922526488816E-016, 1.00000000000000, 0.000000000000000 ) )
#272 = ORIENTED_EDGE( '', *, *, #416, .T. )
#273 = ORIENTED_EDGE( '', *, *, #411, .F. )
#274 = ORIENTED_EDGE( '', *, *, #420, .T. )
#275 = ORIENTED_EDGE( '', *, *, #421, .F. )
#276 = ORIENTED_EDGE( '', *, *, #422, .T. )
#277 = ORIENTED_EDGE( '', *, *, #423, .F. )
#278 = ORIENTED_EDGE( '', *, *, #418, .T. )
#279 = ORIENTED_EDGE( '', *, *, #424, .T. )
#280 = ORIENTED_EDGE( '', *, *, #425, .T. )
#281 = ORIENTED_EDGE( '', *, *, #409, .T. )
#282 = ORIENTED_EDGE( '', *, *, #426, .T. )
#283 = ORIENTED_EDGE( '', *, *, #427, .T. )
#284 = ORIENTED_EDGE( '', *, *, #428, .T. )
#285 = ORIENTED_EDGE( '', *, *, #429, .T. )
#286 = CARTESIAN_POINT( '', ( -35.6107784431138, 80.8239520958084, 8.00000000000000 ) )
#287 = DIRECTION( '', ( 0.000000000000000, 0.000000000000000, 1.00000000000000 ) )
#288 = DIRECTION( '', ( 1.00000000000000, 0.000000000000000, 0.000000000000000 ) )
#289 = ORIENTED_EDGE( '', *, *, #413, .T. )
#290 = ORIENTED_EDGE( '', *, *, #415, .T. )
#291 = ORIENTED_EDGE( '', *, *, #430, .T. )
#292 = ORIENTED_EDGE( '', *, *, #431, .T. )
#293 = ORIENTED_EDGE( '', *, *, #432, .T. )
#294 = ORIENTED_EDGE( '', *, *, #433, .T. )
#295 = CARTESIAN_POINT( '', ( -30.6107784431138, -15.1760479041916, 3.00000000000000 ) )
#296 = DIRECTION( '', ( 0.000000000000000, 0.000000000000000, 1.00000000000000 ) )
#297 = DIRECTION( '', ( 1.00000000000000, 0.000000000000000, 0.000000000000000 ) )
#298 = ORIENTED_EDGE( '', *, *, #433, .F. )
#299 = ORIENTED_EDGE( '', *, *, #434, .F. )
#300 = ORIENTED_EDGE( '', *, *, #420, .F. )
#301 = ORIENTED_EDGE( '', *, *, #414, .F. )
#302 = CARTESIAN_POINT( '', ( 94.8892215568862, 68.3239520958084, 3.00000000000000 ) )
#303 = DIRECTION( '', ( 0.000000000000000, 0.000000000000000, 1.00000000000000 ) )
#304 = DIRECTION( '', ( -1.00000000000000, 0.000000000000000, 0.000000000000000 ) )
#305 = ORIENTED_EDGE( '', *, *, #431, .F. )
#306 = ORIENTED_EDGE( '', *, *, #435, .F. )
#307 = ORIENTED_EDGE( '', *, *, #422, .F. )
#308 = ORIENTED_EDGE( '', *, *, #436, .F. )
#309 = CARTESIAN_POINT( '', ( 94.8892215568862, -12.6760479041916, 3.00000000000000 ) )
#310 = DIRECTION( '', ( 0.000000000000000, 0.000000000000000, 1.00000000000000 ) )
#311 = DIRECTION( '', ( -1.00000000000000, 0.000000000000000, 0.000000000000000 ) )
#312 = ORIENTED_EDGE( '', *, *, #437, .T. )
#313 = ORIENTED_EDGE( '', *, *, #438, .F. )
#314 = CARTESIAN_POINT( '', ( -5.61077844311378, -20.1760479041916, 4.50000000000000 ) )
#315 = DIRECTION( '', ( 0.000000000000000, 0.000000000000000, 1.00000000000000 ) )
#316 = DIRECTION( '', ( 1.00000000000000, 0.000000000000000, 0.000000000000000 ) )
#317 = ORIENTED_EDGE( '', *, *, #437, .F. )
#318 = ORIENTED_EDGE( '', *, *, #427, .F. )
#319 = CARTESIAN_POINT( '', ( -5.61077844311378, -20.1760479041916, 3.00000000000000 ) )
#320 = DIRECTION( '', ( 0.000000000000000, 0.000000000000000, -1.00000000000000 ) )
#321 = DIRECTION( '', ( 1.00000000000000, 0.000000000000000, 0.000000000000000 ) )
#322 = ORIENTED_EDGE( '', *, *, #403, .T. )
#323 = ORIENTED_EDGE( '', *, *, #410, .F. )
#324 = ORIENTED_EDGE( '', *, *, #425, .F. )
#325 = ORIENTED_EDGE( '', *, *, #439, .T. )
#326 = CARTESIAN_POINT( '', ( 102.389221556886, -25.1760479041916, 8.00000000000000 ) )
#327 = DIRECTION( '', ( -1.00000000000000, 0.000000000000000, 0.000000000000000 ) )
#328 = DIRECTION( '', ( 0.000000000000000, 0.000000000000000, 1.00000000000000 ) )
#329 = ORIENTED_EDGE( '', *, *, #404, .T. )
#330 = ORIENTED_EDGE( '', *, *, #439, .F. )
#331 = ORIENTED_EDGE( '', *, *, #424, .F. )
#332 = ORIENTED_EDGE( '', *, *, #417, .T. )
#333 = CARTESIAN_POINT( '', ( -35.6107784431138, -25.1760479041916, 8.00000000000000 ) )
#334 = DIRECTION( '', ( 0.000000000000000, 1.00000000000000, 0.000000000000000 ) )
#335 = DIRECTION( '', ( 0.000000000000000, 0.000000000000000, 1.00000000000000 ) )
#336 = ORIENTED_EDGE( '', *, *, #435, .T. )
#337 = ORIENTED_EDGE( '', *, *, #430, .F. )
#338 = ORIENTED_EDGE( '', *, *, #419, .F. )
#339 = ORIENTED_EDGE( '', *, *, #423, .T. )
#340 = CARTESIAN_POINT( '', ( -30.6107784431138, -15.1760479041916, 3.00000000000000 ) )
#341 = DIRECTION( '', ( 0.000000000000000, -1.00000000000000, 0.000000000000000 ) )
#342 = DIRECTION( '', ( 0.000000000000000, 0.000000000000000, -1.00000000000000 ) )
#343 = ORIENTED_EDGE( '', *, *, #440, .F. )
#344 = ORIENTED_EDGE( '', *, *, #426, .F. )
#345 = CARTESIAN_POINT( '', ( 72.3892215568862, 75.8239520958084, 3.00000000000000 ) )
#346 = DIRECTION( '', ( 0.000000000000000, 0.000000000000000, -1.00000000000000 ) )
#347 = DIRECTION( '', ( 1.00000000000000, 0.000000000000000, 0.000000000000000 ) )
#348 = ORIENTED_EDGE( '', *, *, #441, .F. )
#349 = ORIENTED_EDGE( '', *, *, #429, .F. )
#350 = CARTESIAN_POINT( '', ( -5.61077844311378, 75.8239520958084, 3.00000000000000 ) )
#351 = DIRECTION( '', ( 0.000000000000000, 0.000000000000000, -1.00000000000000 ) )
#352 = DIRECTION( '', ( 1.00000000000000, 0.000000000000000, 0.000000000000000 ) )
#353 = ORIENTED_EDGE( '', *, *, #442, .F. )
#354 = ORIENTED_EDGE( '', *, *, #428, .F. )
#355 = CARTESIAN_POINT( '', ( 72.3892215568862, -20.1760479041916, 3.00000000000000 ) )
#356 = DIRECTION( '', ( 0.000000000000000, 0.000000000000000, -1.00000000000000 ) )
#357 = DIRECTION( '', ( 1.00000000000000, 0.000000000000000, 0.000000000000000 ) )
#358 = ORIENTED_EDGE( '', *, *, #421, .T. )
#359 = ORIENTED_EDGE( '', *, *, #434, .T. )
#360 = ORIENTED_EDGE( '', *, *, #432, .F. )
#361 = ORIENTED_EDGE( '', *, *, #436, .T. )
#362 = CARTESIAN_POINT( '', ( 97.3892215568862, -15.1760479041916, 3.00000000000000 ) )
#363 = DIRECTION( '', ( 1.00000000000000, 0.000000000000000, 0.000000000000000 ) )
#364 = DIRECTION( '', ( 0.000000000000000, 0.000000000000000, -1.00000000000000 ) )
#365 = ORIENTED_EDGE( '', *, *, #443, .T. )
#366 = ORIENTED_EDGE( '', *, *, #401, .F. )
#367 = CARTESIAN_POINT( '', ( 72.3892215568862, -20.1760479041916, 4.50000000000000 ) )
#368 = DIRECTION( '', ( 0.000000000000000, 0.000000000000000, 1.00000000000000 ) )
#369 = DIRECTION( '', ( -1.00000000000000, 0.000000000000000, 0.000000000000000 ) )
#370 = ORIENTED_EDGE( '', *, *, #442, .T. )
#371 = ORIENTED_EDGE( '', *, *, #443, .F. )
#372 = CARTESIAN_POINT( '', ( 72.3892215568862, -20.1760479041916, 4.50000000000000 ) )
#373 = DIRECTION( '', ( 0.000000000000000, 0.000000000000000, 1.00000000000000 ) )
#374 = DIRECTION( '', ( 1.00000000000000, 0.000000000000000, 0.000000000000000 ) )
#375 = ORIENTED_EDGE( '', *, *, #444, .T. )
#376 = ORIENTED_EDGE( '', *, *, #406, .F. )
#377 = CARTESIAN_POINT( '', ( 72.3892215568862, 75.8239520958084, 4.50000000000000 ) )
#378 = DIRECTION( '', ( 0.000000000000000, 0.000000000000000, 1.00000000000000 ) )
#379 = DIRECTION( '', ( -1.00000000000000, 0.000000000000000, 0.000000000000000 ) )
#380 = ORIENTED_EDGE( '', *, *, #440, .T. )
#381 = ORIENTED_EDGE( '', *, *, #444, .F. )
#382 = CARTESIAN_POINT( '', ( 72.3892215568862, 75.8239520958084, 4.50000000000000 ) )
#383 = DIRECTION( '', ( 0.000000000000000, 0.000000000000000, 1.00000000000000 ) )
#384 = DIRECTION( '', ( 1.00000000000000, 0.000000000000000, 0.000000000000000 ) )
#385 = ORIENTED_EDGE( '', *, *, #445, .T. )
#386 = ORIENTED_EDGE( '', *, *, #400, .F. )
#387 = CARTESIAN_POINT( '', ( -5.61077844311378, 75.8239520958084, 4.50000000000000 ) )
#388 = DIRECTION( '', ( 0.000000000000000, 0.000000000000000, 1.00000000000000 ) )
#389 = DIRECTION( '', ( -1.00000000000000, 0.000000000000000, 0.000000000000000 ) )
#390 = ORIENTED_EDGE( '', *, *, #441, .T. )
#391 = ORIENTED_EDGE( '', *, *, #445, .F. )
#392 = CARTESIAN_POINT( '', ( -5.61077844311378, 75.8239520958084, 4.50000000000000 ) )
#393 = DIRECTION( '', ( 0.000000000000000, 0.000000000000000, 1.00000000000000 ) )
#394 = DIRECTION( '', ( 1.00000000000000, 0.000000000000000, 0.000000000000000 ) )
#395 = ORIENTED_EDGE( '', *, *, #438, .T. )
#396 = ORIENTED_EDGE( '', *, *, #407, .F. )
#397 = CARTESIAN_POINT( '', ( -5.61077844311378, -20.1760479041916, 4.50000000000000 ) )
#398 = DIRECTION( '', ( 0.000000000000000, 0.000000000000000, 1.00000000000000 ) )
#399 = DIRECTION( '', ( -1.00000000000000, 0.000000000000000, 0.000000000000000 ) )
#400 = EDGE_CURVE( '', #446, #446, #447, .T. )
#401 = EDGE_CURVE( '', #448, #448, #449, .T. )
#402 = EDGE_CURVE( '', #450, #451, #452, .T. )
#403 = EDGE_CURVE( '', #453, #450, #454, .T. )
#404 = EDGE_CURVE( '', #455, #453, #456, .T. )
#405 = EDGE_CURVE( '', #451, #455, #457, .T. )
#406 = EDGE_CURVE( '', #458, #458, #459, .T. )
#407 = EDGE_CURVE( '', #460, #460, #461, .T. )
#408 = EDGE_CURVE( '', #462, #451, #463, .T. )
#409 = EDGE_CURVE( '', #464, #462, #465, .T. )
#410 = EDGE_CURVE( '', #464, #450, #466, .T. )
#411 = EDGE_CURVE( '', #467, #468, #469, .T. )
#412 = EDGE_CURVE( '', #470, #468, #471, .T. )
#413 = EDGE_CURVE( '', #472, #470, #473, .T. )
#414 = EDGE_CURVE( '', #472, #467, #474, .T. )
#415 = EDGE_CURVE( '', #470, #475, #476, .T. )
#416 = EDGE_CURVE( '', #462, #468, #477, .T. )
#417 = EDGE_CURVE( '', #478, #455, #479, .T. )
#418 = EDGE_CURVE( '', #480, #478, #481, .T. )
#419 = EDGE_CURVE( '', #480, #475, #482, .T. )
#420 = EDGE_CURVE( '', #467, #483, #484, .F. )
#421 = EDGE_CURVE( '', #485, #483, #486, .T. )
#422 = EDGE_CURVE( '', #485, #487, #488, .F. )
#423 = EDGE_CURVE( '', #480, #487, #489, .T. )
#424 = EDGE_CURVE( '', #478, #490, #491, .T. )
#425 = EDGE_CURVE( '', #490, #464, #492, .T. )
#426 = EDGE_CURVE( '', #493, #493, #494, .T. )
#427 = EDGE_CURVE( '', #495, #495, #496, .T. )
#428 = EDGE_CURVE( '', #497, #497, #498, .T. )
#429 = EDGE_CURVE( '', #499, #499, #500, .T. )
#430 = EDGE_CURVE( '', #475, #501, #502, .T. )
#431 = EDGE_CURVE( '', #501, #503, #504, .T. )
#432 = EDGE_CURVE( '', #503, #505, #506, .T. )
#433 = EDGE_CURVE( '', #505, #472, #507, .T. )
#434 = EDGE_CURVE( '', #483, #505, #508, .F. )
#435 = EDGE_CURVE( '', #487, #501, #509, .F. )
#436 = EDGE_CURVE( '', #503, #485, #510, .T. )
#437 = EDGE_CURVE( '', #511, #511, #512, .T. )
#438 = EDGE_CURVE( '', #513, #513, #514, .T. )
#439 = EDGE_CURVE( '', #490, #453, #515, .T. )
#440 = EDGE_CURVE( '', #516, #516, #517, .T. )
#441 = EDGE_CURVE( '', #518, #518, #519, .T. )
#442 = EDGE_CURVE( '', #520, #520, #521, .T. )
#443 = EDGE_CURVE( '', #522, #522, #523, .T. )
#444 = EDGE_CURVE( '', #524, #524, #525, .T. )
#445 = EDGE_CURVE( '', #526, #526, #527, .T. )
#446 = VERTEX_POINT( '', #528 )
#447 = CIRCLE( '', #529, 4.00000000000000 )
#448 = VERTEX_POINT( '', #530 )
#449 = CIRCLE( '', #531, 4.00000000000000 )
#450 = VERTEX_POINT( '', #532 )
#451 = VERTEX_POINT( '', #533 )
#452 = LINE( '', #534, #535 )
#453 = VERTEX_POINT( '', #536 )
#454 = LINE( '', #537, #538 )
#455 = VERTEX_POINT( '', #539 )
#456 = LINE( '', #540, #541 )
#457 = LINE( '', #542, #543 )
#458 = VERTEX_POINT( '', #544 )
#459 = CIRCLE( '', #545, 4.00000000000000 )
#460 = VERTEX_POINT( '', #546 )
#461 = CIRCLE( '', #547, 4.00000000000000 )
#462 = VERTEX_POINT( '', #548 )
#463 = LINE( '', #549, #550 )
#464 = VERTEX_POINT( '', #551 )
#465 = LINE( '', #552, #553 )
#466 = LINE( '', #554, #555 )
#467 = VERTEX_POINT( '', #556 )
#468 = VERTEX_POINT( '', #557 )
#469 = LINE( '', #558, #559 )
#470 = VERTEX_POINT( '', #560 )
#471 = LINE( '', #561, #562 )
#472 = VERTEX_POINT( '', #563 )
#473 = LINE( '', #564, #565 )
#474 = LINE( '', #566, #567 )
#475 = VERTEX_POINT( '', #568 )
#476 = LINE( '', #569, #570 )
#477 = LINE( '', #571, #572 )
#478 = VERTEX_POINT( '', #573 )
#479 = LINE( '', #574, #575 )
#480 = VERTEX_POINT( '', #576 )
#481 = LINE( '', #577, #578 )
#482 = LINE( '', #579, #580 )
#483 = VERTEX_POINT( '', #581 )
#484 = CIRCLE( '', #582, 2.50000000000000 )
#485 = VERTEX_POINT( '', #583 )
#486 = LINE( '', #584, #585 )
#487 = VERTEX_POINT( '', #586 )
#488 = CIRCLE( '', #587, 2.50000000000000 )
#489 = LINE( '', #588, #589 )
#490 = VERTEX_POINT( '', #590 )
#491 = LINE( '', #591, #592 )
#492 = LINE( '', #593, #594 )
#493 = VERTEX_POINT( '', #595 )
#494 = CIRCLE( '', #596, 2.25000000000000 )
#495 = VERTEX_POINT( '', #597 )
#496 = CIRCLE( '', #598, 2.25000000000000 )
#497 = VERTEX_POINT( '', #599 )
#498 = CIRCLE( '', #600, 2.25000000000000 )
#499 = VERTEX_POINT( '', #601 )
#500 = CIRCLE( '', #602, 2.25000000000000 )
#501 = VERTEX_POINT( '', #603 )
#502 = LINE( '', #604, #605 )
#503 = VERTEX_POINT( '', #606 )
#504 = CIRCLE( '', #607, 2.50000000000000 )
#505 = VERTEX_POINT( '', #608 )
#506 = LINE( '', #609, #610 )
#507 = CIRCLE( '', #611, 2.50000000000000 )
#508 = LINE( '', #612, #613 )
#509 = LINE( '', #614, #615 )
#510 = LINE( '', #616, #617 )
#511 = VERTEX_POINT( '', #618 )
#512 = CIRCLE( '', #619, 2.25000000000000 )
#513 = VERTEX_POINT( '', #620 )
#514 = CIRCLE( '', #621, 4.00000000000000 )
#515 = LINE( '', #622, #623 )
#516 = VERTEX_POINT( '', #624 )
#517 = CIRCLE( '', #625, 2.25000000000000 )
#518 = VERTEX_POINT( '', #626 )
#519 = CIRCLE( '', #627, 2.25000000000000 )
#520 = VERTEX_POINT( '', #628 )
#521 = CIRCLE( '', #629, 2.25000000000000 )
#522 = VERTEX_POINT( '', #630 )
#523 = CIRCLE( '', #631, 4.00000000000000 )
#524 = VERTEX_POINT( '', #632 )
#525 = CIRCLE( '', #633, 4.00000000000000 )
#526 = VERTEX_POINT( '', #634 )
#527 = CIRCLE( '', #635, 4.00000000000000 )
#528 = CARTESIAN_POINT( '', ( -5.61077844311378, 79.8239520958084, 0.000000000000000 ) )
#529 = AXIS2_PLACEMENT_3D( '', #636, #637, #638 )
#530 = CARTESIAN_POINT( '', ( 72.3892215568862, -16.1760479041916, 0.000000000000000 ) )
#531 = AXIS2_PLACEMENT_3D( '', #639, #640, #641 )
#532 = CARTESIAN_POINT( '', ( 102.389221556886, 80.8239520958084, 0.000000000000000 ) )
#533 = CARTESIAN_POINT( '', ( -35.6107784431138, 80.8239520958084, 0.000000000000000 ) )
#534 = CARTESIAN_POINT( '', ( 102.389221556886, 80.8239520958084, 0.000000000000000 ) )
#535 = VECTOR( '', #642, 1000.00000000000 )
#536 = CARTESIAN_POINT( '', ( 102.389221556886, -25.1760479041916, 0.000000000000000 ) )
#537 = CARTESIAN_POINT( '', ( 102.389221556886, -25.1760479041916, 0.000000000000000 ) )
#538 = VECTOR( '', #643, 1000.00000000000 )
#539 = CARTESIAN_POINT( '', ( -35.6107784431138, -25.1760479041916, 0.000000000000000 ) )
#540 = CARTESIAN_POINT( '', ( -35.6107784431138, -25.1760479041916, 0.000000000000000 ) )
#541 = VECTOR( '', #644, 1000.00000000000 )
#542 = CARTESIAN_POINT( '', ( -35.6107784431138, 80.8239520958084, 0.000000000000000 ) )
#543 = VECTOR( '', #645, 1000.00000000000 )
#544 = CARTESIAN_POINT( '', ( 72.3892215568862, 79.8239520958084, 0.000000000000000 ) )
#545 = AXIS2_PLACEMENT_3D( '', #646, #647, #648 )
#546 = CARTESIAN_POINT( '', ( -5.61077844311378, -16.1760479041916, 0.000000000000000 ) )
#547 = AXIS2_PLACEMENT_3D( '', #649, #650, #651 )
#548 = CARTESIAN_POINT( '', ( -35.6107784431138, 80.8239520958084, 8.00000000000000 ) )
#549 = CARTESIAN_POINT( '', ( -35.6107784431138, 80.8239520958084, 8.00000000000000 ) )
#550 = VECTOR( '', #652, 1000.00000000000 )
#551 = CARTESIAN_POINT( '', ( 102.389221556886, 80.8239520958084, 8.00000000000000 ) )
#552 = CARTESIAN_POINT( '', ( 102.389221556886, 80.8239520958084, 8.00000000000000 ) )
#553 = VECTOR( '', #653, 1000.00000000000 )
#554 = CARTESIAN_POINT( '', ( 102.389221556886, 80.8239520958084, 8.00000000000000 ) )
#555 = VECTOR( '', #654, 1000.00000000000 )
#556 = CARTESIAN_POINT( '', ( 94.8892215568862, 70.8239520958084, 8.00000000000000 ) )
#557 = CARTESIAN_POINT( '', ( -35.6107784431138, 70.8239520958084, 8.00000000000000 ) )
#558 = CARTESIAN_POINT( '', ( 97.3892215568862, 70.8239520958084, 8.00000000000000 ) )
#559 = VECTOR( '', #655, 1000.00000000000 )
#560 = CARTESIAN_POINT( '', ( -35.6107784431138, 70.8239520958084, 3.00000000000000 ) )
#561 = CARTESIAN_POINT( '', ( -35.6107784431138, 70.8239520958084, 8.00000000000000 ) )
#562 = VECTOR( '', #656, 1000.00000000000 )
#563 = CARTESIAN_POINT( '', ( 94.8892215568862, 70.8239520958084, 3.00000000000000 ) )
#564 = CARTESIAN_POINT( '', ( 97.3892215568862, 70.8239520958084, 3.00000000000000 ) )
#565 = VECTOR( '', #657, 1000.00000000000 )
#566 = CARTESIAN_POINT( '', ( 94.8892215568862, 70.8239520958084, 8.00000000000000 ) )
#567 = VECTOR( '', #658, 1000.00000000000 )
#568 = CARTESIAN_POINT( '', ( -35.6107784431138, -15.1760479041916, 3.00000000000000 ) )
#569 = CARTESIAN_POINT( '', ( -35.6107784431138, 80.8239520958084, 3.00000000000000 ) )
#570 = VECTOR( '', #659, 1000.00000000000 )
#571 = CARTESIAN_POINT( '', ( -35.6107784431138, 80.8239520958084, 8.00000000000000 ) )
#572 = VECTOR( '', #660, 1000.00000000000 )
#573 = CARTESIAN_POINT( '', ( -35.6107784431138, -25.1760479041916, 8.00000000000000 ) )
#574 = CARTESIAN_POINT( '', ( -35.6107784431138, -25.1760479041916, 8.00000000000000 ) )
#575 = VECTOR( '', #661, 1000.00000000000 )
#576 = CARTESIAN_POINT( '', ( -35.6107784431138, -15.1760479041916, 8.00000000000000 ) )
#577 = CARTESIAN_POINT( '', ( -35.6107784431138, 80.8239520958084, 8.00000000000000 ) )
#578 = VECTOR( '', #662, 1000.00000000000 )
#579 = CARTESIAN_POINT( '', ( -35.6107784431138, -15.1760479041916, 8.00000000000000 ) )
#580 = VECTOR( '', #663, 1000.00000000000 )
#581 = CARTESIAN_POINT( '', ( 97.3892215568862, 68.3239520958084, 8.00000000000000 ) )
#582 = AXIS2_PLACEMENT_3D( '', #664, #665, #666 )
#583 = CARTESIAN_POINT( '', ( 97.3892215568862, -12.6760479041916, 8.00000000000000 ) )
#584 = CARTESIAN_POINT( '', ( 97.3892215568862, -15.1760479041916, 8.00000000000000 ) )
#585 = VECTOR( '', #667, 1000.00000000000 )
#586 = CARTESIAN_POINT( '', ( 94.8892215568862, -15.1760479041916, 8.00000000000000 ) )
#587 = AXIS2_PLACEMENT_3D( '', #668, #669, #670 )
#588 = CARTESIAN_POINT( '', ( -30.6107784431138, -15.1760479041916, 8.00000000000000 ) )
#589 = VECTOR( '', #671, 1000.00000000000 )
#590 = CARTESIAN_POINT( '', ( 102.389221556886, -25.1760479041916, 8.00000000000000 ) )
#591 = CARTESIAN_POINT( '', ( -35.6107784431138, -25.1760479041916, 8.00000000000000 ) )
#592 = VECTOR( '', #672, 1000.00000000000 )
#593 = CARTESIAN_POINT( '', ( 102.389221556886, -25.1760479041916, 8.00000000000000 ) )
#594 = VECTOR( '', #673, 1000.00000000000 )
#595 = CARTESIAN_POINT( '', ( 72.3892215568862, 78.0739520958084, 8.00000000000000 ) )
#596 = AXIS2_PLACEMENT_3D( '', #674, #675, #676 )
#597 = CARTESIAN_POINT( '', ( -5.61077844311378, -17.9260479041916, 8.00000000000000 ) )
#598 = AXIS2_PLACEMENT_3D( '', #677, #678, #679 )
#599 = CARTESIAN_POINT( '', ( 72.3892215568862, -17.9260479041916, 8.00000000000000 ) )
#600 = AXIS2_PLACEMENT_3D( '', #680, #681, #682 )
#601 = CARTESIAN_POINT( '', ( -5.61077844311378, 78.0739520958084, 8.00000000000000 ) )
#602 = AXIS2_PLACEMENT_3D( '', #683, #684, #685 )
#603 = CARTESIAN_POINT( '', ( 94.8892215568862, -15.1760479041916, 3.00000000000000 ) )
#604 = CARTESIAN_POINT( '', ( -30.6107784431138, -15.1760479041916, 3.00000000000000 ) )
#605 = VECTOR( '', #686, 1000.00000000000 )
#606 = CARTESIAN_POINT( '', ( 97.3892215568862, -12.6760479041916, 3.00000000000000 ) )
#607 = AXIS2_PLACEMENT_3D( '', #687, #688, #689 )
#608 = CARTESIAN_POINT( '', ( 97.3892215568862, 68.3239520958084, 3.00000000000000 ) )
#609 = CARTESIAN_POINT( '', ( 97.3892215568862, -15.1760479041916, 3.00000000000000 ) )
#610 = VECTOR( '', #690, 1000.00000000000 )
#611 = AXIS2_PLACEMENT_3D( '', #691, #692, #693 )
#612 = CARTESIAN_POINT( '', ( 97.3892215568862, 68.3239520958084, 3.00000000000000 ) )
#613 = VECTOR( '', #694, 1000.00000000000 )
#614 = CARTESIAN_POINT( '', ( 94.8892215568862, -15.1760479041916, 3.00000000000000 ) )
#615 = VECTOR( '', #695, 1000.00000000000 )
#616 = CARTESIAN_POINT( '', ( 97.3892215568862, -12.6760479041916, 8.00000000000000 ) )
#617 = VECTOR( '', #696, 1000.00000000000 )
#618 = CARTESIAN_POINT( '', ( -3.36077844311378, -20.1760479041916, 4.50000000000000 ) )
#619 = AXIS2_PLACEMENT_3D( '', #697, #698, #699 )
#620 = CARTESIAN_POINT( '', ( -5.61077844311378, -16.1760479041916, 4.50000000000000 ) )
#621 = AXIS2_PLACEMENT_3D( '', #700, #701, #702 )
#622 = CARTESIAN_POINT( '', ( 102.389221556886, -25.1760479041916, 8.00000000000000 ) )
#623 = VECTOR( '', #703, 1000.00000000000 )
#624 = CARTESIAN_POINT( '', ( 74.6392215568862, 75.8239520958084, 4.50000000000000 ) )
#625 = AXIS2_PLACEMENT_3D( '', #704, #705, #706 )
#626 = CARTESIAN_POINT( '', ( -3.36077844311378, 75.8239520958084, 4.50000000000000 ) )
#627 = AXIS2_PLACEMENT_3D( '', #707, #708, #709 )
#628 = CARTESIAN_POINT( '', ( 74.6392215568862, -20.1760479041916, 4.50000000000000 ) )
#629 = AXIS2_PLACEMENT_3D( '', #710, #711, #712 )
#630 = CARTESIAN_POINT( '', ( 72.3892215568862, -16.1760479041916, 4.50000000000000 ) )
#631 = AXIS2_PLACEMENT_3D( '', #713, #714, #715 )
#632 = CARTESIAN_POINT( '', ( 72.3892215568862, 79.8239520958084, 4.50000000000000 ) )
#633 = AXIS2_PLACEMENT_3D( '', #716, #717, #718 )
#634 = CARTESIAN_POINT( '', ( -5.61077844311378, 79.8239520958084, 4.50000000000000 ) )
#635 = AXIS2_PLACEMENT_3D( '', #719, #720, #721 )
#636 = CARTESIAN_POINT( '', ( -5.61077844311378, 75.8239520958084, 0.000000000000000 ) )
#637 = DIRECTION( '', ( 0.000000000000000, 0.000000000000000, 1.00000000000000 ) )
#638 = DIRECTION( '', ( 0.000000000000000, 1.00000000000000, 0.000000000000000 ) )
#639 = CARTESIAN_POINT( '', ( 72.3892215568862, -20.1760479041916, 0.000000000000000 ) )
#640 = DIRECTION( '', ( 0.000000000000000, 0.000000000000000, 1.00000000000000 ) )
#641 = DIRECTION( '', ( 0.000000000000000, 1.00000000000000, 0.000000000000000 ) )
#642 = DIRECTION( '', ( -1.00000000000000, -1.00563679766771E-016, 0.000000000000000 ) )
#643 = DIRECTION( '', ( 0.000000000000000, 1.00000000000000, 0.000000000000000 ) )
#644 = DIRECTION( '', ( 1.00000000000000, 0.000000000000000, 0.000000000000000 ) )
#645 = DIRECTION( '', ( 1.30922526488816E-016, -1.00000000000000, 0.000000000000000 ) )
#646 = CARTESIAN_POINT( '', ( 72.3892215568862, 75.8239520958084, 0.000000000000000 ) )
#647 = DIRECTION( '', ( 0.000000000000000, 0.000000000000000, 1.00000000000000 ) )
#648 = DIRECTION( '', ( 0.000000000000000, 1.00000000000000, 0.000000000000000 ) )
#649 = CARTESIAN_POINT( '', ( -5.61077844311378, -20.1760479041916, 0.000000000000000 ) )
#650 = DIRECTION( '', ( 0.000000000000000, 0.000000000000000, 1.00000000000000 ) )
#651 = DIRECTION( '', ( 0.000000000000000, 1.00000000000000, 0.000000000000000 ) )
#652 = DIRECTION( '', ( 0.000000000000000, 0.000000000000000, -1.00000000000000 ) )
#653 = DIRECTION( '', ( -1.00000000000000, -1.00563679766771E-016, 0.000000000000000 ) )
#654 = DIRECTION( '', ( 0.000000000000000, 0.000000000000000, -1.00000000000000 ) )
#655 = DIRECTION( '', ( -1.00000000000000, 0.000000000000000, 0.000000000000000 ) )
#656 = DIRECTION( '', ( 0.000000000000000, 0.000000000000000, 1.00000000000000 ) )
#657 = DIRECTION( '', ( -1.00000000000000, 0.000000000000000, 0.000000000000000 ) )
#658 = DIRECTION( '', ( 0.000000000000000, 0.000000000000000, 1.00000000000000 ) )
#659 = DIRECTION( '', ( 1.30922526488816E-016, -1.00000000000000, 0.000000000000000 ) )
#660 = DIRECTION( '', ( 1.30922526488816E-016, -1.00000000000000, 0.000000000000000 ) )
#661 = DIRECTION( '', ( 0.000000000000000, 0.000000000000000, -1.00000000000000 ) )
#662 = DIRECTION( '', ( 1.30922526488816E-016, -1.00000000000000, 0.000000000000000 ) )
#663 = DIRECTION( '', ( 0.000000000000000, 0.000000000000000, -1.00000000000000 ) )
#664 = CARTESIAN_POINT( '', ( 94.8892215568862, 68.3239520958084, 8.00000000000000 ) )
#665 = DIRECTION( '', ( 0.000000000000000, 0.000000000000000, 1.00000000000000 ) )
#666 = DIRECTION( '', ( 1.00000000000000, 0.000000000000000, 0.000000000000000 ) )
#667 = DIRECTION( '', ( 0.000000000000000, 1.00000000000000, 0.000000000000000 ) )
#668 = CARTESIAN_POINT( '', ( 94.8892215568862, -12.6760479041916, 8.00000000000000 ) )
#669 = DIRECTION( '', ( 0.000000000000000, 0.000000000000000, 1.00000000000000 ) )
#670 = DIRECTION( '', ( 1.00000000000000, 0.000000000000000, 0.000000000000000 ) )
#671 = DIRECTION( '', ( 1.00000000000000, 0.000000000000000, 0.000000000000000 ) )
#672 = DIRECTION( '', ( 1.00000000000000, 0.000000000000000, 0.000000000000000 ) )
#673 = DIRECTION( '', ( 0.000000000000000, 1.00000000000000, 0.000000000000000 ) )
#674 = CARTESIAN_POINT( '', ( 72.3892215568862, 75.8239520958084, 8.00000000000000 ) )
#675 = DIRECTION( '', ( 0.000000000000000, 0.000000000000000, -1.00000000000000 ) )
#676 = DIRECTION( '', ( 0.000000000000000, 1.00000000000000, 0.000000000000000 ) )
#677 = CARTESIAN_POINT( '', ( -5.61077844311378, -20.1760479041916, 8.00000000000000 ) )
#678 = DIRECTION( '', ( 0.000000000000000, 0.000000000000000, -1.00000000000000 ) )
#679 = DIRECTION( '', ( 0.000000000000000, 1.00000000000000, 0.000000000000000 ) )
#680 = CARTESIAN_POINT( '', ( 72.3892215568862, -20.1760479041916, 8.00000000000000 ) )
#681 = DIRECTION( '', ( 0.000000000000000, 0.000000000000000, -1.00000000000000 ) )
#682 = DIRECTION( '', ( 0.000000000000000, 1.00000000000000, 0.000000000000000 ) )
#683 = CARTESIAN_POINT( '', ( -5.61077844311378, 75.8239520958084, 8.00000000000000 ) )
#684 = DIRECTION( '', ( 0.000000000000000, 0.000000000000000, -1.00000000000000 ) )
#685 = DIRECTION( '', ( 0.000000000000000, 1.00000000000000, 0.000000000000000 ) )
#686 = DIRECTION( '', ( 1.00000000000000, 0.000000000000000, 0.000000000000000 ) )
#687 = CARTESIAN_POINT( '', ( 94.8892215568862, -12.6760479041916, 3.00000000000000 ) )
#688 = DIRECTION( '', ( 0.000000000000000, 0.000000000000000, 1.00000000000000 ) )
#689 = DIRECTION( '', ( 1.00000000000000, 0.000000000000000, 0.000000000000000 ) )
#690 = DIRECTION( '', ( 0.000000000000000, 1.00000000000000, 0.000000000000000 ) )
#691 = CARTESIAN_POINT( '', ( 94.8892215568862, 68.3239520958084, 3.00000000000000 ) )
#692 = DIRECTION( '', ( 0.000000000000000, 0.000000000000000, 1.00000000000000 ) )
#693 = DIRECTION( '', ( 1.00000000000000, 0.000000000000000, 0.000000000000000 ) )
#694 = DIRECTION( '', ( 0.000000000000000, 0.000000000000000, 1.00000000000000 ) )
#695 = DIRECTION( '', ( 0.000000000000000, 0.000000000000000, 1.00000000000000 ) )
#696 = DIRECTION( '', ( 0.000000000000000, 0.000000000000000, 1.00000000000000 ) )
#697 = CARTESIAN_POINT( '', ( -5.61077844311378, -20.1760479041916, 4.50000000000000 ) )
#698 = DIRECTION( '', ( 0.000000000000000, 0.000000000000000, 1.00000000000000 ) )
#699 = DIRECTION( '', ( 1.00000000000000, 0.000000000000000, 0.000000000000000 ) )
#700 = CARTESIAN_POINT( '', ( -5.61077844311378, -20.1760479041916, 4.50000000000000 ) )
#701 = DIRECTION( '', ( 0.000000000000000, 0.000000000000000, 1.00000000000000 ) )
#702 = DIRECTION( '', ( 0.000000000000000, 1.00000000000000, 0.000000000000000 ) )
#703 = DIRECTION( '', ( 0.000000000000000, 0.000000000000000, -1.00000000000000 ) )
#704 = CARTESIAN_POINT( '', ( 72.3892215568862, 75.8239520958084, 4.50000000000000 ) )
#705 = DIRECTION( '', ( 0.000000000000000, 0.000000000000000, 1.00000000000000 ) )
#706 = DIRECTION( '', ( 1.00000000000000, 0.000000000000000, 0.000000000000000 ) )
#707 = CARTESIAN_POINT( '', ( -5.61077844311378, 75.8239520958084, 4.50000000000000 ) )
#708 = DIRECTION( '', ( 0.000000000000000, 0.000000000000000, 1.00000000000000 ) )
#709 = DIRECTION( '', ( 1.00000000000000, 0.000000000000000, 0.000000000000000 ) )
#710 = CARTESIAN_POINT( '', ( 72.3892215568862, -20.1760479041916, 4.50000000000000 ) )
#711 = DIRECTION( '', ( 0.000000000000000, 0.000000000000000, 1.00000000000000 ) )
#712 = DIRECTION( '', ( 1.00000000000000, 0.000000000000000, 0.000000000000000 ) )
#713 = CARTESIAN_POINT( '', ( 72.3892215568862, -20.1760479041916, 4.50000000000000 ) )
#714 = DIRECTION( '', ( 0.000000000000000, 0.000000000000000, 1.00000000000000 ) )
#715 = DIRECTION( '', ( 0.000000000000000, 1.00000000000000, 0.000000000000000 ) )
#716 = CARTESIAN_POINT( '', ( 72.3892215568862, 75.8239520958084, 4.50000000000000 ) )
#717 = DIRECTION( '', ( 0.000000000000000, 0.000000000000000, 1.00000000000000 ) )
#718 = DIRECTION( '', ( 0.000000000000000, 1.00000000000000, 0.000000000000000 ) )
#719 = CARTESIAN_POINT( '', ( -5.61077844311378, 75.8239520958084, 4.50000000000000 ) )
#720 = DIRECTION( '', ( 0.000000000000000, 0.000000000000000, 1.00000000000000 ) )
#721 = DIRECTION( '', ( 0.000000000000000, 1.00000000000000, 0.000000000000000 ) )
ENDSEC
END-ISO-10303-21
