# Supplementary material for: Microfluidics on liquid handling stations (μF-on-LHS): an industry compatible chip interface between microfluidics and automated liquid handling stations
Source: Royal Society of Chemistry journal article supplement (doi:10.1039/c3lc00042g), 2013-01-01
Supplement: c3lc00042g_2.stp [file c3lc00042g_2.stp]

ISO-10303-21
HEADER
FILE_DESCRIPTION( ( 'Unknown' ), '1' )
FILE_NAME( 'W:/Arbeitsbackup20121130/Projekt 10-871/_ISO_Projektmanagement/Fach24_CAD/Pipettierroboter/cone_screw.stp', 'Unknown', ( 'Unknown' ), ( 'Unknown' ), 'XStep 1.0', 'Unknown', ' ' )
FILE_SCHEMA( ( 'CONFIG_CONTROL_DESIGN' ) )
ENDSEC
DATA
#1 = DESIGN_CONTEXT( '', #27, 'design' )
#2 = APPLICATION_PROTOCOL_DEFINITION( 'INTERNATIONAL STANDARD', 'config_control_design', 1994, #27 )
#3 = PRODUCT_CATEGORY_RELATIONSHIP( 'NONE', 'NONE', #28, #29 )
#4 = DATE_AND_TIME( #30, #31 )
#5 = DATE_TIME_ROLE( 'creation_date' )
#6 = DATE_TIME_ROLE( 'classification_date' )
#7 = PERSON_AND_ORGANIZATION_ROLE( 'creator' )
#8 = PERSON_AND_ORGANIZATION_ROLE( 'design_supplier' )
#9 = PERSON_AND_ORGANIZATION_ROLE( 'classification_officer' )
#10 = PERSON_AND_ORGANIZATION_ROLE( 'design_owner' )
#11 = APPROVAL_PERSON_ORGANIZATION( #32, #33, #34 )
#12 = APPROVAL_DATE_TIME( #4, #33 )
#13 = CC_DESIGN_APPROVAL( #33, ( #35, #36, #37 ) )
#14 = CC_DESIGN_DATE_AND_TIME_ASSIGNMENT( #4, #5, ( #37 ) )
#15 = CC_DESIGN_DATE_AND_TIME_ASSIGNMENT( #4, #6, ( #35 ) )
#16 = CC_DESIGN_PERSON_AND_ORGANIZATION_ASSIGNMENT( #32, #10, ( #38 ) )
#17 = CC_DESIGN_PERSON_AND_ORGANIZATION_ASSIGNMENT( #32, #7, ( #37 ) )
#18 = CC_DESIGN_PERSON_AND_ORGANIZATION_ASSIGNMENT( #32, #7, ( #36 ) )
#19 = CC_DESIGN_PERSON_AND_ORGANIZATION_ASSIGNMENT( #32, #8, ( #36 ) )
#20 = CC_DESIGN_SECURITY_CLASSIFICATION( #35, ( #36 ) )
#21 = CC_DESIGN_PERSON_AND_ORGANIZATION_ASSIGNMENT( #32, #9, ( #35 ) )
#22 = SHAPE_DEFINITION_REPRESENTATION( #39, #40 )
#23 = ( GEOMETRIC_REPRESENTATION_CONTEXT( 3 )GLOBAL_UNCERTAINTY_ASSIGNED_CONTEXT( ( #43 ) )GLOBAL_UNIT_ASSIGNED_CONTEXT( ( #45, #46, #47 ) )REPRESENTATION_CONTEXT( 'NONE', 'WORKSPACE' ) )
#27 = APPLICATION_CONTEXT( 'CONFIGURATION CONTROLLED 3D DESIGNS OF MECHANICAL PARTS AND ASSEMBLIES' )
#28 = PRODUCT_CATEGORY( 'part', 'NONE' )
#29 = PRODUCT_RELATED_PRODUCT_CATEGORY( 'detail', ' ', ( #38 ) )
#30 = CALENDAR_DATE( 2012, 6, 11 )
#31 = LOCAL_TIME( 10, 19, 43.0000000000000, #49 )
#32 = PERSON_AND_ORGANIZATION( #50, #51 )
#33 = APPROVAL( #52, 'SOLID MODEL' )
#34 = APPROVAL_ROLE( 'APPROVED' )
#35 = SECURITY_CLASSIFICATION( '', '', #53 )
#36 = PRODUCT_DEFINITION_FORMATION_WITH_SPECIFIED_SOURCE( ' ', 'NONE', #38, .NOT_KNOWN. )
#37 = PRODUCT_DEFINITION( 'NONE', 'NONE', #36, #1 )
#38 = PRODUCT( '1', '1', 'PART-1-DESC', ( #54 ) )
#39 = PRODUCT_DEFINITION_SHAPE( 'NONE', 'NONE', #37 )
#40 = ADVANCED_BREP_SHAPE_REPRESENTATION( '1', ( #55, #56 ), #23 )
#43 = UNCERTAINTY_MEASURE_WITH_UNIT( LENGTH_MEASURE( 0.00100000000000000 ), #45, '', '' )
#45 = ( CONVERSION_BASED_UNIT( 'MILLIMETRE', #59 )LENGTH_UNIT( )NAMED_UNIT( #62 ) )
#46 = ( NAMED_UNIT( #64 )PLANE_ANGLE_UNIT( )SI_UNIT( $, .RADIAN. ) )
#47 = ( NAMED_UNIT( #64 )SOLID_ANGLE_UNIT( )SI_UNIT( $, .STERADIAN. ) )
#49 = COORDINATED_UNIVERSAL_TIME_OFFSET( 1, 0, .AHEAD. )
#50 = PERSON( '', 'UNSPECIFIED', $, $, $, $ )
#51 = ORGANIZATION( 'UNSPECIFIED', 'UNSPECIFIED', 'UNSPECIFIED' )
#52 = APPROVAL_STATUS( 'approved' )
#53 = SECURITY_CLASSIFICATION_LEVEL( 'unclassified' )
#54 = MECHANICAL_CONTEXT( '', #27, 'mechanical' )
#55 = MANIFOLD_SOLID_BREP( '1', #70 )
#56 = AXIS2_PLACEMENT_3D( '', #71, #72, #73 )
#59 = LENGTH_MEASURE_WITH_UNIT( LENGTH_MEASURE( 1.00000000000000 ), #74 )
#62 = DIMENSIONAL_EXPONENTS( 1.00000000000000, 0.000000000000000, 0.000000000000000, 0.000000000000000, 0.000000000000000, 0.000000000000000, 0.000000000000000 )
#64 = DIMENSIONAL_EXPONENTS( 0.000000000000000, 0.000000000000000, 0.000000000000000, 0.000000000000000, 0.000000000000000, 0.000000000000000, 0.000000000000000 )
#70 = CLOSED_SHELL( '', ( #75, #76, #77, #78, #79, #80, #81, #82, #83, #84, #85, #86 ) )
#71 = CARTESIAN_POINT( '', ( 0.000000000000000, 0.000000000000000, 0.000000000000000 ) )
#72 = DIRECTION( '', ( 0.000000000000000, 0.000000000000000, 1.00000000000000 ) )
#73 = DIRECTION( '', ( 1.00000000000000, 0.000000000000000, 0.000000000000000 ) )
#74 = ( NAMED_UNIT( #62 )LENGTH_UNIT( )SI_UNIT( .MILLI., .METRE. ) )
#75 = ADVANCED_FACE( '', ( #88, #89 ), #90, .T. )
#76 = ADVANCED_FACE( '', ( #91 ), #92, .T. )
#77 = ADVANCED_FACE( '', ( #93 ), #94, .T. )
#78 = ADVANCED_FACE( '', ( #95, #96 ), #97, .T. )
#79 = ADVANCED_FACE( '', ( #98, #99 ), #100, .T. )
#80 = ADVANCED_FACE( '', ( #101, #102 ), #103, .T. )
#81 = ADVANCED_FACE( '', ( #104 ), #105, .T. )
#82 = ADVANCED_FACE( '', ( #106 ), #107, .T. )
#83 = ADVANCED_FACE( '', ( #108 ), #109, .T. )
#84 = ADVANCED_FACE( '', ( #110 ), #111, .T. )
#85 = ADVANCED_FACE( '', ( #112 ), #113, .T. )
#86 = ADVANCED_FACE( '', ( #114 ), #115, .F. )
#88 = FACE_OUTER_BOUND( '', #116, .T. )
#89 = FACE_BOUND( '', #117, .T. )
#90 = PLANE( '', #118 )
#91 = FACE_OUTER_BOUND( '', #119, .T. )
#92 = PLANE( '', #120 )
#93 = FACE_OUTER_BOUND( '', #121, .T. )
#94 = PLANE( '', #122 )
#95 = FACE_OUTER_BOUND( '', #123, .T. )
#96 = FACE_OUTER_BOUND( '', #124, .T. )
#97 = CYLINDRICAL_SURFACE( '', #125, 4.00000000000000 )
#98 = FACE_BOUND( '', #126, .T. )
#99 = FACE_OUTER_BOUND( '', #127, .T. )
#100 = CONICAL_SURFACE( '', #128, 4.00000000000000, 0.336674819386727 )
#101 = FACE_OUTER_BOUND( '', #129, .T. )
#102 = FACE_OUTER_BOUND( '', #130, .T. )
#103 = CYLINDRICAL_SURFACE( '', #131, 0.499999999999999 )
#104 = FACE_OUTER_BOUND( '', #132, .T. )
#105 = PLANE( '', #133 )
#106 = FACE_OUTER_BOUND( '', #134, .T. )
#107 = PLANE( '', #135 )
#108 = FACE_OUTER_BOUND( '', #136, .T. )
#109 = PLANE( '', #137 )
#110 = FACE_OUTER_BOUND( '', #138, .T. )
#111 = PLANE( '', #139 )
#112 = FACE_OUTER_BOUND( '', #140, .T. )
#113 = PLANE( '', #141 )
#114 = FACE_OUTER_BOUND( '', #142, .T. )
#115 = PLANE( '', #143 )
#116 = EDGE_LOOP( '', ( #144 ) )
#117 = EDGE_LOOP( '', ( #145, #146, #147, #148, #149, #150 ) )
#118 = AXIS2_PLACEMENT_3D( '', #151, #152, #153 )
#119 = EDGE_LOOP( '', ( #154, #155, #156, #157 ) )
#120 = AXIS2_PLACEMENT_3D( '', #158, #159, #160 )
#121 = EDGE_LOOP( '', ( #161, #162, #163, #164 ) )
#122 = AXIS2_PLACEMENT_3D( '', #165, #166, #167 )
#123 = EDGE_LOOP( '', ( #168 ) )
#124 = EDGE_LOOP( '', ( #169 ) )
#125 = AXIS2_PLACEMENT_3D( '', #170, #171, #172 )
#126 = EDGE_LOOP( '', ( #173 ) )
#127 = EDGE_LOOP( '', ( #174 ) )
#128 = AXIS2_PLACEMENT_3D( '', #175, #176, #177 )
#129 = EDGE_LOOP( '', ( #178 ) )
#130 = EDGE_LOOP( '', ( #179 ) )
#131 = AXIS2_PLACEMENT_3D( '', #180, #181, #182 )
#132 = EDGE_LOOP( '', ( #183 ) )
#133 = AXIS2_PLACEMENT_3D( '', #184, #185, #186 )
#134 = EDGE_LOOP( '', ( #187, #188, #189, #190 ) )
#135 = AXIS2_PLACEMENT_3D( '', #191, #192, #193 )
#136 = EDGE_LOOP( '', ( #194, #195, #196, #197 ) )
#137 = AXIS2_PLACEMENT_3D( '', #198, #199, #200 )
#138 = EDGE_LOOP( '', ( #201, #202, #203, #204 ) )
#139 = AXIS2_PLACEMENT_3D( '', #205, #206, #207 )
#140 = EDGE_LOOP( '', ( #208, #209, #210, #211 ) )
#141 = AXIS2_PLACEMENT_3D( '', #212, #213, #214 )
#142 = EDGE_LOOP( '', ( #215, #216, #217, #218, #219, #220 ) )
#143 = AXIS2_PLACEMENT_3D( '', #221, #222, #223 )
#144 = ORIENTED_EDGE( '', *, *, #224, .T. )
#145 = ORIENTED_EDGE( '', *, *, #225, .T. )
#146 = ORIENTED_EDGE( '', *, *, #226, .T. )
#147 = ORIENTED_EDGE( '', *, *, #227, .T. )
#148 = ORIENTED_EDGE( '', *, *, #228, .T. )
#149 = ORIENTED_EDGE( '', *, *, #229, .T. )
#150 = ORIENTED_EDGE( '', *, *, #230, .T. )
#151 = CARTESIAN_POINT( '', ( 0.000000000000000, 0.000000000000000, 30.0000000000000 ) )
#152 = DIRECTION( '', ( 0.000000000000000, 0.000000000000000, 1.00000000000000 ) )
#153 = DIRECTION( '', ( 1.00000000000000, 0.000000000000000, 0.000000000000000 ) )
#154 = ORIENTED_EDGE( '', *, *, #227, .F. )
#155 = ORIENTED_EDGE( '', *, *, #231, .F. )
#156 = ORIENTED_EDGE( '', *, *, #232, .T. )
#157 = ORIENTED_EDGE( '', *, *, #233, .T. )
#158 = CARTESIAN_POINT( '', ( 0.00687562617565076, -2.80000000000000, 28.0000000000000 ) )
#159 = DIRECTION( '', ( 0.433333333333333, 0.901233722306385, 0.000000000000000 ) )
#160 = DIRECTION( '', ( -0.901233722306385, 0.433333333333333, 0.000000000000000 ) )
#161 = ORIENTED_EDGE( '', *, *, #226, .F. )
#162 = ORIENTED_EDGE( '', *, *, #234, .F. )
#163 = ORIENTED_EDGE( '', *, *, #235, .T. )
#164 = ORIENTED_EDGE( '', *, *, #231, .T. )
#165 = CARTESIAN_POINT( '', ( 2.71057679309480, -1.50000000000000, 28.0000000000000 ) )
#166 = DIRECTION( '', ( -0.433333333333333, 0.901233722306385, 0.000000000000000 ) )
#167 = DIRECTION( '', ( -0.901233722306385, -0.433333333333333, 0.000000000000000 ) )
#168 = ORIENTED_EDGE( '', *, *, #236, .T. )
#169 = ORIENTED_EDGE( '', *, *, #224, .F. )
#170 = CARTESIAN_POINT( '', ( 0.000000000000000, 0.000000000000000, 3.67381906146713E-015 ) )
#171 = DIRECTION( '', ( 0.000000000000000, 0.000000000000000, -1.00000000000000 ) )
#172 = DIRECTION( '', ( 1.00000000000000, 0.000000000000000, 0.000000000000000 ) )
#173 = ORIENTED_EDGE( '', *, *, #237, .T. )
#174 = ORIENTED_EDGE( '', *, *, #236, .F. )
#175 = CARTESIAN_POINT( '', ( 0.000000000000000, 0.000000000000000, 18.0000000000000 ) )
#176 = DIRECTION( '', ( 0.000000000000000, 0.000000000000000, 1.00000000000000 ) )
#177 = DIRECTION( '', ( 1.00000000000000, 0.000000000000000, 0.000000000000000 ) )
#178 = ORIENTED_EDGE( '', *, *, #238, .T. )
#179 = ORIENTED_EDGE( '', *, *, #237, .F. )
#180 = CARTESIAN_POINT( '', ( 0.000000000000000, 0.000000000000000, 3.67381906146713E-015 ) )
#181 = DIRECTION( '', ( 0.000000000000000, 0.000000000000000, -1.00000000000000 ) )
#182 = DIRECTION( '', ( 1.00000000000000, 0.000000000000000, 0.000000000000000 ) )
#183 = ORIENTED_EDGE( '', *, *, #238, .F. )
#184 = CARTESIAN_POINT( '', ( 3.06151588455594E-017, 0.500000000000000, 3.57163300671037E-015 ) )
#185 = DIRECTION( '', ( 0.000000000000000, 0.000000000000000, -1.00000000000000 ) )
#186 = DIRECTION( '', ( -1.00000000000000, 0.000000000000000, 0.000000000000000 ) )
#187 = ORIENTED_EDGE( '', *, *, #228, .F. )
#188 = ORIENTED_EDGE( '', *, *, #233, .F. )
#189 = ORIENTED_EDGE( '', *, *, #239, .T. )
#190 = ORIENTED_EDGE( '', *, *, #240, .T. )
#191 = CARTESIAN_POINT( '', ( -2.69682554074350, -1.50000000000000, 28.0000000000000 ) )
#192 = DIRECTION( '', ( 1.00000000000000, 0.000000000000000, 0.000000000000000 ) )
#193 = DIRECTION( '', ( 0.000000000000000, 0.000000000000000, -1.00000000000000 ) )
#194 = ORIENTED_EDGE( '', *, *, #229, .F. )
#195 = ORIENTED_EDGE( '', *, *, #240, .F. )
#196 = ORIENTED_EDGE( '', *, *, #241, .T. )
#197 = ORIENTED_EDGE( '', *, *, #242, .T. )
#198 = CARTESIAN_POINT( '', ( -2.69682554074350, 1.50000000000000, 28.0000000000000 ) )
#199 = DIRECTION( '', ( 0.433333333333333, -0.901233722306385, 0.000000000000000 ) )
#200 = DIRECTION( '', ( 0.901233722306385, 0.433333333333333, 0.000000000000000 ) )
#201 = ORIENTED_EDGE( '', *, *, #230, .F. )
#202 = ORIENTED_EDGE( '', *, *, #242, .F. )
#203 = ORIENTED_EDGE( '', *, *, #243, .T. )
#204 = ORIENTED_EDGE( '', *, *, #244, .T. )
#205 = CARTESIAN_POINT( '', ( 0.00687562617565024, 2.80000000000000, 28.0000000000000 ) )
#206 = DIRECTION( '', ( -0.433333333333333, -0.901233722306385, 0.000000000000000 ) )
#207 = DIRECTION( '', ( 0.901233722306385, -0.433333333333333, 0.000000000000000 ) )
#208 = ORIENTED_EDGE( '', *, *, #225, .F. )
#209 = ORIENTED_EDGE( '', *, *, #244, .F. )
#210 = ORIENTED_EDGE( '', *, *, #245, .T. )
#211 = ORIENTED_EDGE( '', *, *, #234, .T. )
#212 = CARTESIAN_POINT( '', ( 2.71057679309480, 1.50000000000000, 28.0000000000000 ) )
#213 = DIRECTION( '', ( -1.00000000000000, 0.000000000000000, 0.000000000000000 ) )
#214 = DIRECTION( '', ( 0.000000000000000, 0.000000000000000, 1.00000000000000 ) )
#215 = ORIENTED_EDGE( '', *, *, #235, .F. )
#216 = ORIENTED_EDGE( '', *, *, #245, .F. )
#217 = ORIENTED_EDGE( '', *, *, #243, .F. )
#218 = ORIENTED_EDGE( '', *, *, #241, .F. )
#219 = ORIENTED_EDGE( '', *, *, #239, .F. )
#220 = ORIENTED_EDGE( '', *, *, #232, .F. )
#221 = CARTESIAN_POINT( '', ( -2.69682554074350, -4.10000000000000, 28.0000000000000 ) )
#222 = DIRECTION( '', ( 0.000000000000000, 0.000000000000000, -1.00000000000000 ) )
#223 = DIRECTION( '', ( -1.00000000000000, 0.000000000000000, 0.000000000000000 ) )
#224 = EDGE_CURVE( '', #246, #246, #247, .T. )
#225 = EDGE_CURVE( '', #248, #249, #250, .T. )
#226 = EDGE_CURVE( '', #249, #251, #252, .T. )
#227 = EDGE_CURVE( '', #251, #253, #254, .T. )
#228 = EDGE_CURVE( '', #253, #255, #256, .T. )
#229 = EDGE_CURVE( '', #255, #257, #258, .T. )
#230 = EDGE_CURVE( '', #257, #248, #259, .T. )
#231 = EDGE_CURVE( '', #260, #251, #261, .T. )
#232 = EDGE_CURVE( '', #260, #262, #263, .T. )
#233 = EDGE_CURVE( '', #262, #253, #264, .T. )
#234 = EDGE_CURVE( '', #265, #249, #266, .T. )
#235 = EDGE_CURVE( '', #265, #260, #267, .T. )
#236 = EDGE_CURVE( '', #268, #268, #269, .T. )
#237 = EDGE_CURVE( '', #270, #270, #271, .T. )
#238 = EDGE_CURVE( '', #272, #272, #273, .T. )
#239 = EDGE_CURVE( '', #262, #274, #275, .T. )
#240 = EDGE_CURVE( '', #274, #255, #276, .T. )
#241 = EDGE_CURVE( '', #274, #277, #278, .T. )
#242 = EDGE_CURVE( '', #277, #257, #279, .T. )
#243 = EDGE_CURVE( '', #277, #280, #281, .T. )
#244 = EDGE_CURVE( '', #280, #248, #282, .T. )
#245 = EDGE_CURVE( '', #280, #265, #283, .T. )
#246 = VERTEX_POINT( '', #284 )
#247 = CIRCLE( '', #285, 4.00000000000000 )
#248 = VERTEX_POINT( '', #286 )
#249 = VERTEX_POINT( '', #287 )
#250 = LINE( '', #288, #289 )
#251 = VERTEX_POINT( '', #290 )
#252 = LINE( '', #291, #292 )
#253 = VERTEX_POINT( '', #293 )
#254 = LINE( '', #294, #295 )
#255 = VERTEX_POINT( '', #296 )
#256 = LINE( '', #297, #298 )
#257 = VERTEX_POINT( '', #299 )
#258 = LINE( '', #300, #301 )
#259 = LINE( '', #302, #303 )
#260 = VERTEX_POINT( '', #304 )
#261 = LINE( '', #305, #306 )
#262 = VERTEX_POINT( '', #307 )
#263 = LINE( '', #308, #309 )
#264 = LINE( '', #310, #311 )
#265 = VERTEX_POINT( '', #312 )
#266 = LINE( '', #313, #314 )
#267 = LINE( '', #315, #316 )
#268 = VERTEX_POINT( '', #317 )
#269 = CIRCLE( '', #318, 4.00000000000000 )
#270 = VERTEX_POINT( '', #319 )
#271 = CIRCLE( '', #320, 0.499999999999999 )
#272 = VERTEX_POINT( '', #321 )
#273 = CIRCLE( '', #322, 0.500000000000000 )
#274 = VERTEX_POINT( '', #323 )
#275 = LINE( '', #324, #325 )
#276 = LINE( '', #326, #327 )
#277 = VERTEX_POINT( '', #328 )
#278 = LINE( '', #329, #330 )
#279 = LINE( '', #331, #332 )
#280 = VERTEX_POINT( '', #333 )
#281 = LINE( '', #334, #335 )
#282 = LINE( '', #336, #337 )
#283 = LINE( '', #338, #339 )
#284 = CARTESIAN_POINT( '', ( 4.00000000000000, 0.000000000000000, 30.0000000000000 ) )
#285 = AXIS2_PLACEMENT_3D( '', #340, #341, #342 )
#286 = CARTESIAN_POINT( '', ( 2.71057679309480, 1.50000000000000, 30.0000000000000 ) )
#287 = CARTESIAN_POINT( '', ( 2.71057679309480, -1.50000000000000, 30.0000000000000 ) )
#288 = CARTESIAN_POINT( '', ( 2.71057679309480, 1.50000000000000, 30.0000000000000 ) )
#289 = VECTOR( '', #343, 1000.00000000000 )
#290 = CARTESIAN_POINT( '', ( 0.00687562617565076, -2.80000000000000, 30.0000000000000 ) )
#291 = CARTESIAN_POINT( '', ( 2.71057679309480, -1.50000000000000, 30.0000000000000 ) )
#292 = VECTOR( '', #344, 1000.00000000000 )
#293 = CARTESIAN_POINT( '', ( -2.69682554074350, -1.50000000000000, 30.0000000000000 ) )
#294 = CARTESIAN_POINT( '', ( 0.00687562617565076, -2.80000000000000, 30.0000000000000 ) )
#295 = VECTOR( '', #345, 1000.00000000000 )
#296 = CARTESIAN_POINT( '', ( -2.69682554074350, 1.50000000000000, 30.0000000000000 ) )
#297 = CARTESIAN_POINT( '', ( -2.69682554074350, -1.50000000000000, 30.0000000000000 ) )
#298 = VECTOR( '', #346, 1000.00000000000 )
#299 = CARTESIAN_POINT( '', ( 0.00687562617565076, 2.80000000000000, 30.0000000000000 ) )
#300 = CARTESIAN_POINT( '', ( -2.69682554074350, 1.50000000000000, 30.0000000000000 ) )
#301 = VECTOR( '', #347, 1000.00000000000 )
#302 = CARTESIAN_POINT( '', ( 0.00687562617565024, 2.80000000000000, 30.0000000000000 ) )
#303 = VECTOR( '', #348, 1000.00000000000 )
#304 = CARTESIAN_POINT( '', ( 0.00687562617565076, -2.80000000000000, 28.0000000000000 ) )
#305 = CARTESIAN_POINT( '', ( 0.00687562617565076, -2.80000000000000, 28.0000000000000 ) )
#306 = VECTOR( '', #349, 1000.00000000000 )
#307 = CARTESIAN_POINT( '', ( -2.69682554074350, -1.50000000000000, 28.0000000000000 ) )
#308 = CARTESIAN_POINT( '', ( 0.00687562617565076, -2.80000000000000, 28.0000000000000 ) )
#309 = VECTOR( '', #350, 1000.00000000000 )
#310 = CARTESIAN_POINT( '', ( -2.69682554074350, -1.50000000000000, 28.0000000000000 ) )
#311 = VECTOR( '', #351, 1000.00000000000 )
#312 = CARTESIAN_POINT( '', ( 2.71057679309480, -1.50000000000000, 28.0000000000000 ) )
#313 = CARTESIAN_POINT( '', ( 2.71057679309480, -1.50000000000000, 28.0000000000000 ) )
#314 = VECTOR( '', #352, 1000.00000000000 )
#315 = CARTESIAN_POINT( '', ( 2.71057679309480, -1.50000000000000, 28.0000000000000 ) )
#316 = VECTOR( '', #353, 1000.00000000000 )
#317 = CARTESIAN_POINT( '', ( 4.00000000000000, 0.000000000000000, 18.0000000000000 ) )
#318 = AXIS2_PLACEMENT_3D( '', #354, #355, #356 )
#319 = CARTESIAN_POINT( '', ( 0.499999999999999, 0.000000000000000, 8.00000000000000 ) )
#320 = AXIS2_PLACEMENT_3D( '', #357, #358, #359 )
#321 = CARTESIAN_POINT( '', ( 0.500000000000000, 0.000000000000000, 3.46944695195361E-015 ) )
#322 = AXIS2_PLACEMENT_3D( '', #360, #361, #362 )
#323 = CARTESIAN_POINT( '', ( -2.69682554074350, 1.50000000000000, 28.0000000000000 ) )
#324 = CARTESIAN_POINT( '', ( -2.69682554074350, -1.50000000000000, 28.0000000000000 ) )
#325 = VECTOR( '', #363, 1000.00000000000 )
#326 = CARTESIAN_POINT( '', ( -2.69682554074350, 1.50000000000000, 28.0000000000000 ) )
#327 = VECTOR( '', #364, 1000.00000000000 )
#328 = CARTESIAN_POINT( '', ( 0.00687562617565076, 2.80000000000000, 28.0000000000000 ) )
#329 = CARTESIAN_POINT( '', ( -2.69682554074350, 1.50000000000000, 28.0000000000000 ) )
#330 = VECTOR( '', #365, 1000.00000000000 )
#331 = CARTESIAN_POINT( '', ( 0.00687562617565076, 2.80000000000000, 28.0000000000000 ) )
#332 = VECTOR( '', #366, 1000.00000000000 )
#333 = CARTESIAN_POINT( '', ( 2.71057679309480, 1.50000000000000, 28.0000000000000 ) )
#334 = CARTESIAN_POINT( '', ( 0.00687562617565024, 2.80000000000000, 28.0000000000000 ) )
#335 = VECTOR( '', #367, 1000.00000000000 )
#336 = CARTESIAN_POINT( '', ( 2.71057679309480, 1.50000000000000, 28.0000000000000 ) )
#337 = VECTOR( '', #368, 1000.00000000000 )
#338 = CARTESIAN_POINT( '', ( 2.71057679309480, 1.50000000000000, 28.0000000000000 ) )
#339 = VECTOR( '', #369, 1000.00000000000 )
#340 = CARTESIAN_POINT( '', ( 0.000000000000000, 0.000000000000000, 30.0000000000000 ) )
#341 = DIRECTION( '', ( 0.000000000000000, 0.000000000000000, 1.00000000000000 ) )
#342 = DIRECTION( '', ( 1.00000000000000, 0.000000000000000, 0.000000000000000 ) )
#343 = DIRECTION( '', ( 0.000000000000000, -1.00000000000000, 0.000000000000000 ) )
#344 = DIRECTION( '', ( -0.901233722306385, -0.433333333333333, 0.000000000000000 ) )
#345 = DIRECTION( '', ( -0.901233722306385, 0.433333333333333, 0.000000000000000 ) )
#346 = DIRECTION( '', ( 0.000000000000000, 1.00000000000000, 0.000000000000000 ) )
#347 = DIRECTION( '', ( 0.901233722306385, 0.433333333333333, 0.000000000000000 ) )
#348 = DIRECTION( '', ( 0.901233722306385, -0.433333333333333, 0.000000000000000 ) )
#349 = DIRECTION( '', ( 0.000000000000000, 0.000000000000000, 1.00000000000000 ) )
#350 = DIRECTION( '', ( -0.901233722306385, 0.433333333333333, 0.000000000000000 ) )
#351 = DIRECTION( '', ( 0.000000000000000, 0.000000000000000, 1.00000000000000 ) )
#352 = DIRECTION( '', ( 0.000000000000000, 0.000000000000000, 1.00000000000000 ) )
#353 = DIRECTION( '', ( -0.901233722306385, -0.433333333333333, 0.000000000000000 ) )
#354 = CARTESIAN_POINT( '', ( 0.000000000000000, 0.000000000000000, 18.0000000000000 ) )
#355 = DIRECTION( '', ( 0.000000000000000, 0.000000000000000, 1.00000000000000 ) )
#356 = DIRECTION( '', ( 1.00000000000000, 0.000000000000000, 0.000000000000000 ) )
#357 = CARTESIAN_POINT( '', ( 0.000000000000000, 0.000000000000000, 8.00000000000000 ) )
#358 = DIRECTION( '', ( 0.000000000000000, 0.000000000000000, 1.00000000000000 ) )
#359 = DIRECTION( '', ( 1.00000000000000, 0.000000000000000, 0.000000000000000 ) )
#360 = CARTESIAN_POINT( '', ( 0.000000000000000, 0.000000000000000, 3.46944695195361E-015 ) )
#361 = DIRECTION( '', ( 0.000000000000000, 0.000000000000000, 1.00000000000000 ) )
#362 = DIRECTION( '', ( 1.00000000000000, 0.000000000000000, 0.000000000000000 ) )
#363 = DIRECTION( '', ( 0.000000000000000, 1.00000000000000, 0.000000000000000 ) )
#364 = DIRECTION( '', ( 0.000000000000000, 0.000000000000000, 1.00000000000000 ) )
#365 = DIRECTION( '', ( 0.901233722306385, 0.433333333333333, 0.000000000000000 ) )
#366 = DIRECTION( '', ( 0.000000000000000, 0.000000000000000, 1.00000000000000 ) )
#367 = DIRECTION( '', ( 0.901233722306385, -0.433333333333333, 0.000000000000000 ) )
#368 = DIRECTION( '', ( 0.000000000000000, 0.000000000000000, 1.00000000000000 ) )
#369 = DIRECTION( '', ( 0.000000000000000, -1.00000000000000, 0.000000000000000 ) )
ENDSEC
END-ISO-10303-21
