# Supplementary material for: Microfluidics on liquid handling stations (μF-on-LHS): an industry compatible chip interface between microfluidics and automated liquid handling stations
Source: Royal Society of Chemistry journal article supplement (doi:10.1039/c3lc00042g), 2013-01-01
Supplement: c3lc00042g_3.stp [file c3lc00042g_3.stp]

ISO-10303-21
HEADER
FILE_DESCRIPTION( ( 'Unknown' ), '1' )
FILE_NAME( 'D:/Arbeitsbackup20130226/Ver�ffentlichungen/LabChip/�F-on-LHS/Revision/Replication_master.stp', 'Unknown', ( 'Unknown' ), ( 'Unknown' ), 'XStep 1.0', 'Unknown', ' ' )
FILE_SCHEMA( ( 'CONFIG_CONTROL_DESIGN' ) )
ENDSEC
DATA
#1 = DESIGN_CONTEXT( '', #27, 'design' )
#2 = APPLICATION_PROTOCOL_DEFINITION( 'INTERNATIONAL STANDARD', 'config_control_design', 1994, #27 )
#3 = PRODUCT_CATEGORY_RELATIONSHIP( 'NONE', 'NONE', #28, #29 )
#4 = DATE_AND_TIME( #30, #31 )
#5 = DATE_TIME_ROLE( 'creation_date' )
#6 = DATE_TIME_ROLE( 'classification_date' )
#7 = PERSON_AND_ORGANIZATION_ROLE( 'creator' )
#8 = PERSON_AND_ORGANIZATION_ROLE( 'design_supplier' )
#9 = PERSON_AND_ORGANIZATION_ROLE( 'classification_officer' )
#10 = PERSON_AND_ORGANIZATION_ROLE( 'design_owner' )
#11 = APPROVAL_PERSON_ORGANIZATION( #32, #33, #34 )
#12 = APPROVAL_DATE_TIME( #4, #33 )
#13 = CC_DESIGN_APPROVAL( #33, ( #35, #36, #37 ) )
#14 = CC_DESIGN_DATE_AND_TIME_ASSIGNMENT( #4, #5, ( #37 ) )
#15 = CC_DESIGN_DATE_AND_TIME_ASSIGNMENT( #4, #6, ( #35 ) )
#16 = CC_DESIGN_PERSON_AND_ORGANIZATION_ASSIGNMENT( #32, #10, ( #38 ) )
#17 = CC_DESIGN_PERSON_AND_ORGANIZATION_ASSIGNMENT( #32, #7, ( #37 ) )
#18 = CC_DESIGN_PERSON_AND_ORGANIZATION_ASSIGNMENT( #32, #7, ( #36 ) )
#19 = CC_DESIGN_PERSON_AND_ORGANIZATION_ASSIGNMENT( #32, #8, ( #36 ) )
#20 = CC_DESIGN_SECURITY_CLASSIFICATION( #35, ( #36 ) )
#21 = CC_DESIGN_PERSON_AND_ORGANIZATION_ASSIGNMENT( #32, #9, ( #35 ) )
#22 = SHAPE_DEFINITION_REPRESENTATION( #39, #40 )
#23 = ( GEOMETRIC_REPRESENTATION_CONTEXT( 3 )GLOBAL_UNCERTAINTY_ASSIGNED_CONTEXT( ( #43 ) )GLOBAL_UNIT_ASSIGNED_CONTEXT( ( #45, #46, #47 ) )REPRESENTATION_CONTEXT( 'NONE', 'WORKSPACE' ) )
#27 = APPLICATION_CONTEXT( 'CONFIGURATION CONTROLLED 3D DESIGNS OF MECHANICAL PARTS AND ASSEMBLIES' )
#28 = PRODUCT_CATEGORY( 'part', 'NONE' )
#29 = PRODUCT_RELATED_PRODUCT_CATEGORY( 'detail', ' ', ( #38 ) )
#30 = CALENDAR_DATE( 2013, 21, 2 )
#31 = LOCAL_TIME( 9, 41, 38.0000000000000, #49 )
#32 = PERSON_AND_ORGANIZATION( #50, #51 )
#33 = APPROVAL( #52, 'SOLID MODEL' )
#34 = APPROVAL_ROLE( 'APPROVED' )
#35 = SECURITY_CLASSIFICATION( '', '', #53 )
#36 = PRODUCT_DEFINITION_FORMATION_WITH_SPECIFIED_SOURCE( ' ', 'NONE', #38, .NOT_KNOWN. )
#37 = PRODUCT_DEFINITION( 'NONE', 'NONE', #36, #1 )
#38 = PRODUCT( '1', '1', 'PART-1-DESC', ( #54 ) )
#39 = PRODUCT_DEFINITION_SHAPE( 'NONE', 'NONE', #37 )
#40 = ADVANCED_BREP_SHAPE_REPRESENTATION( '1', ( #55, #56 ), #23 )
#43 = UNCERTAINTY_MEASURE_WITH_UNIT( LENGTH_MEASURE( 0.00100000000000000 ), #45, '', '' )
#45 = ( CONVERSION_BASED_UNIT( 'MILLIMETRE', #59 )LENGTH_UNIT( )NAMED_UNIT( #62 ) )
#46 = ( NAMED_UNIT( #64 )PLANE_ANGLE_UNIT( )SI_UNIT( $, .RADIAN. ) )
#47 = ( NAMED_UNIT( #64 )SOLID_ANGLE_UNIT( )SI_UNIT( $, .STERADIAN. ) )
#49 = COORDINATED_UNIVERSAL_TIME_OFFSET( 1, 0, .AHEAD. )
#50 = PERSON( '', 'UNSPECIFIED', $, $, $, $ )
#51 = ORGANIZATION( 'UNSPECIFIED', 'UNSPECIFIED', 'UNSPECIFIED' )
#52 = APPROVAL_STATUS( 'approved' )
#53 = SECURITY_CLASSIFICATION_LEVEL( 'unclassified' )
#54 = MECHANICAL_CONTEXT( '', #27, 'mechanical' )
#55 = MANIFOLD_SOLID_BREP( '1', #70 )
#56 = AXIS2_PLACEMENT_3D( '', #71, #72, #73 )
#59 = LENGTH_MEASURE_WITH_UNIT( LENGTH_MEASURE( 1.00000000000000 ), #74 )
#62 = DIMENSIONAL_EXPONENTS( 1.00000000000000, 0.000000000000000, 0.000000000000000, 0.000000000000000, 0.000000000000000, 0.000000000000000, 0.000000000000000 )
#64 = DIMENSIONAL_EXPONENTS( 0.000000000000000, 0.000000000000000, 0.000000000000000, 0.000000000000000, 0.000000000000000, 0.000000000000000, 0.000000000000000 )
#70 = CLOSED_SHELL( '', ( #75, #76, #77, #78, #79, #80, #81, #82, #83, #84, #85, #86, #87, #88, #89, #90, #91, #92, #93, #94, #95, #96, #97, #98, #99, #100, #101, #102, #103, #104, #105, #106, #107, #108, #109, #110, #111, #112, #113, #114, #115, #116, #117, #118, #119, #120, #121, #122, #123, #124, #125, #126, #127, #128, #129, #130, #131, #132, #133, #134, #135, #136 ) )
#71 = CARTESIAN_POINT( '', ( 0.000000000000000, 0.000000000000000, 0.000000000000000 ) )
#72 = DIRECTION( '', ( 0.000000000000000, 0.000000000000000, 1.00000000000000 ) )
#73 = DIRECTION( '', ( 1.00000000000000, 0.000000000000000, 0.000000000000000 ) )
#74 = ( NAMED_UNIT( #62 )LENGTH_UNIT( )SI_UNIT( .MILLI., .METRE. ) )
#75 = ADVANCED_FACE( '', ( #138, #139, #140, #141, #142 ), #143, .T. )
#76 = ADVANCED_FACE( '', ( #144 ), #145, .F. )
#77 = ADVANCED_FACE( '', ( #146 ), #147, .F. )
#78 = ADVANCED_FACE( '', ( #148 ), #149, .F. )
#79 = ADVANCED_FACE( '', ( #150 ), #151, .T. )
#80 = ADVANCED_FACE( '', ( #152 ), #153, .T. )
#81 = ADVANCED_FACE( '', ( #154 ), #155, .F. )
#82 = ADVANCED_FACE( '', ( #156 ), #157, .T. )
#83 = ADVANCED_FACE( '', ( #158 ), #159, .F. )
#84 = ADVANCED_FACE( '', ( #160 ), #161, .T. )
#85 = ADVANCED_FACE( '', ( #162 ), #163, .T. )
#86 = ADVANCED_FACE( '', ( #164 ), #165, .F. )
#87 = ADVANCED_FACE( '', ( #166 ), #167, .T. )
#88 = ADVANCED_FACE( '', ( #168 ), #169, .F. )
#89 = ADVANCED_FACE( '', ( #170 ), #171, .F. )
#90 = ADVANCED_FACE( '', ( #172 ), #173, .F. )
#91 = ADVANCED_FACE( '', ( #174 ), #175, .T. )
#92 = ADVANCED_FACE( '', ( #176 ), #177, .F. )
#93 = ADVANCED_FACE( '', ( #178 ), #179, .F. )
#94 = ADVANCED_FACE( '', ( #180 ), #181, .T. )
#95 = ADVANCED_FACE( '', ( #182 ), #183, .T. )
#96 = ADVANCED_FACE( '', ( #184 ), #185, .F. )
#97 = ADVANCED_FACE( '', ( #186 ), #187, .F. )
#98 = ADVANCED_FACE( '', ( #188 ), #189, .T. )
#99 = ADVANCED_FACE( '', ( #190 ), #191, .T. )
#100 = ADVANCED_FACE( '', ( #192 ), #193, .T. )
#101 = ADVANCED_FACE( '', ( #194 ), #195, .F. )
#102 = ADVANCED_FACE( '', ( #196 ), #197, .T. )
#103 = ADVANCED_FACE( '', ( #198 ), #199, .T. )
#104 = ADVANCED_FACE( '', ( #200 ), #201, .F. )
#105 = ADVANCED_FACE( '', ( #202 ), #203, .F. )
#106 = ADVANCED_FACE( '', ( #204 ), #205, .T. )
#107 = ADVANCED_FACE( '', ( #206 ), #207, .F. )
#108 = ADVANCED_FACE( '', ( #208 ), #209, .F. )
#109 = ADVANCED_FACE( '', ( #210 ), #211, .F. )
#110 = ADVANCED_FACE( '', ( #212 ), #213, .F. )
#111 = ADVANCED_FACE( '', ( #214 ), #215, .F. )
#112 = ADVANCED_FACE( '', ( #216 ), #217, .F. )
#113 = ADVANCED_FACE( '', ( #218 ), #219, .T. )
#114 = ADVANCED_FACE( '', ( #220 ), #221, .T. )
#115 = ADVANCED_FACE( '', ( #222 ), #223, .T. )
#116 = ADVANCED_FACE( '', ( #224 ), #225, .F. )
#117 = ADVANCED_FACE( '', ( #226 ), #227, .F. )
#118 = ADVANCED_FACE( '', ( #228 ), #229, .F. )
#119 = ADVANCED_FACE( '', ( #230 ), #231, .F. )
#120 = ADVANCED_FACE( '', ( #232 ), #233, .F. )
#121 = ADVANCED_FACE( '', ( #234 ), #235, .T. )
#122 = ADVANCED_FACE( '', ( #236 ), #237, .T. )
#123 = ADVANCED_FACE( '', ( #238 ), #239, .F. )
#124 = ADVANCED_FACE( '', ( #240 ), #241, .F. )
#125 = ADVANCED_FACE( '', ( #242 ), #243, .T. )
#126 = ADVANCED_FACE( '', ( #244 ), #245, .T. )
#127 = ADVANCED_FACE( '', ( #246 ), #247, .T. )
#128 = ADVANCED_FACE( '', ( #248 ), #249, .F. )
#129 = ADVANCED_FACE( '', ( #250 ), #251, .T. )
#130 = ADVANCED_FACE( '', ( #252 ), #253, .T. )
#131 = ADVANCED_FACE( '', ( #254 ), #255, .T. )
#132 = ADVANCED_FACE( '', ( #256 ), #257, .T. )
#133 = ADVANCED_FACE( '', ( #258 ), #259, .F. )
#134 = ADVANCED_FACE( '', ( #260 ), #261, .T. )
#135 = ADVANCED_FACE( '', ( #262 ), #263, .T. )
#136 = ADVANCED_FACE( '', ( #264 ), #265, .T. )
#138 = FACE_OUTER_BOUND( '', #266, .T. )
#139 = FACE_BOUND( '', #267, .T. )
#140 = FACE_BOUND( '', #268, .T. )
#141 = FACE_BOUND( '', #269, .T. )
#142 = FACE_BOUND( '', #270, .T. )
#143 = PLANE( '', #271 )
#144 = FACE_OUTER_BOUND( '', #272, .T. )
#145 = CYLINDRICAL_SURFACE( '', #273, 1.00000000000000 )
#146 = FACE_OUTER_BOUND( '', #274, .T. )
#147 = PLANE( '', #275 )
#148 = FACE_OUTER_BOUND( '', #276, .T. )
#149 = PLANE( '', #277 )
#150 = FACE_OUTER_BOUND( '', #278, .T. )
#151 = CYLINDRICAL_SURFACE( '', #279, 2.50000000000000 )
#152 = FACE_OUTER_BOUND( '', #280, .T. )
#153 = PLANE( '', #281 )
#154 = FACE_OUTER_BOUND( '', #282, .T. )
#155 = PLANE( '', #283 )
#156 = FACE_OUTER_BOUND( '', #284, .T. )
#157 = PLANE( '', #285 )
#158 = FACE_OUTER_BOUND( '', #286, .T. )
#159 = PLANE( '', #287 )
#160 = FACE_OUTER_BOUND( '', #288, .T. )
#161 = CYLINDRICAL_SURFACE( '', #289, 2.00000000000000 )
#162 = FACE_OUTER_BOUND( '', #290, .T. )
#163 = CYLINDRICAL_SURFACE( '', #291, 0.500000000000000 )
#164 = FACE_OUTER_BOUND( '', #292, .T. )
#165 = PLANE( '', #293 )
#166 = FACE_OUTER_BOUND( '', #294, .T. )
#167 = CYLINDRICAL_SURFACE( '', #295, 2.00000000000000 )
#168 = FACE_OUTER_BOUND( '', #296, .T. )
#169 = PLANE( '', #297 )
#170 = FACE_OUTER_BOUND( '', #298, .T. )
#171 = PLANE( '', #299 )
#172 = FACE_OUTER_BOUND( '', #300, .T. )
#173 = PLANE( '', #301 )
#174 = FACE_OUTER_BOUND( '', #302, .T. )
#175 = PLANE( '', #303 )
#176 = FACE_OUTER_BOUND( '', #304, .T. )
#177 = PLANE( '', #305 )
#178 = FACE_OUTER_BOUND( '', #306, .T. )
#179 = PLANE( '', #307 )
#180 = FACE_OUTER_BOUND( '', #308, .T. )
#181 = CYLINDRICAL_SURFACE( '', #309, 0.500000000000000 )
#182 = FACE_OUTER_BOUND( '', #310, .T. )
#183 = CYLINDRICAL_SURFACE( '', #311, 0.500000000000000 )
#184 = FACE_OUTER_BOUND( '', #312, .T. )
#185 = CYLINDRICAL_SURFACE( '', #313, 1.00000000000000 )
#186 = FACE_OUTER_BOUND( '', #314, .T. )
#187 = CYLINDRICAL_SURFACE( '', #315, 1.00000000000000 )
#188 = FACE_OUTER_BOUND( '', #316, .T. )
#189 = PLANE( '', #317 )
#190 = FACE_OUTER_BOUND( '', #318, .T. )
#191 = PLANE( '', #319 )
#192 = FACE_OUTER_BOUND( '', #320, .T. )
#193 = PLANE( '', #321 )
#194 = FACE_OUTER_BOUND( '', #322, .T. )
#195 = PLANE( '', #323 )
#196 = FACE_OUTER_BOUND( '', #324, .T. )
#197 = CYLINDRICAL_SURFACE( '', #325, 0.500000000000000 )
#198 = FACE_OUTER_BOUND( '', #326, .T. )
#199 = CYLINDRICAL_SURFACE( '', #327, 0.500000000000000 )
#200 = FACE_OUTER_BOUND( '', #328, .T. )
#201 = CYLINDRICAL_SURFACE( '', #329, 8.74999999999993 )
#202 = FACE_OUTER_BOUND( '', #330, .T. )
#203 = PLANE( '', #331 )
#204 = FACE_OUTER_BOUND( '', #332, .T. )
#205 = CYLINDRICAL_SURFACE( '', #333, 9.24999999999993 )
#206 = FACE_OUTER_BOUND( '', #334, .T. )
#207 = PLANE( '', #335 )
#208 = FACE_OUTER_BOUND( '', #336, .T. )
#209 = PLANE( '', #337 )
#210 = FACE_OUTER_BOUND( '', #338, .T. )
#211 = PLANE( '', #339 )
#212 = FACE_OUTER_BOUND( '', #340, .T. )
#213 = PLANE( '', #341 )
#214 = FACE_OUTER_BOUND( '', #342, .T. )
#215 = PLANE( '', #343 )
#216 = FACE_OUTER_BOUND( '', #344, .T. )
#217 = PLANE( '', #345 )
#218 = FACE_OUTER_BOUND( '', #346, .T. )
#219 = CYLINDRICAL_SURFACE( '', #347, 2.00000000000000 )
#220 = FACE_OUTER_BOUND( '', #348, .T. )
#221 = CYLINDRICAL_SURFACE( '', #349, 2.00000000000000 )
#222 = FACE_OUTER_BOUND( '', #350, .T. )
#223 = PLANE( '', #351 )
#224 = FACE_OUTER_BOUND( '', #352, .T. )
#225 = PLANE( '', #353 )
#226 = FACE_OUTER_BOUND( '', #354, .T. )
#227 = PLANE( '', #355 )
#228 = FACE_OUTER_BOUND( '', #356, .T. )
#229 = CYLINDRICAL_SURFACE( '', #357, 8.74999999999985 )
#230 = FACE_OUTER_BOUND( '', #358, .T. )
#231 = PLANE( '', #359 )
#232 = FACE_OUTER_BOUND( '', #360, .T. )
#233 = PLANE( '', #361 )
#234 = FACE_OUTER_BOUND( '', #362, .T. )
#235 = PLANE( '', #363 )
#236 = FACE_OUTER_BOUND( '', #364, .T. )
#237 = PLANE( '', #365 )
#238 = FACE_OUTER_BOUND( '', #366, .T. )
#239 = CYLINDRICAL_SURFACE( '', #367, 1.00000000000000 )
#240 = FACE_OUTER_BOUND( '', #368, .T. )
#241 = PLANE( '', #369 )
#242 = FACE_OUTER_BOUND( '', #370, .T. )
#243 = PLANE( '', #371 )
#244 = FACE_OUTER_BOUND( '', #372, .T. )
#245 = CYLINDRICAL_SURFACE( '', #373, 2.50000000000000 )
#246 = FACE_OUTER_BOUND( '', #374, .T. )
#247 = PLANE( '', #375 )
#248 = FACE_OUTER_BOUND( '', #376, .T. )
#249 = PLANE( '', #377 )
#250 = FACE_OUTER_BOUND( '', #378, .T. )
#251 = CYLINDRICAL_SURFACE( '', #379, 9.24999999999986 )
#252 = FACE_OUTER_BOUND( '', #380, .T. )
#253 = PLANE( '', #381 )
#254 = FACE_OUTER_BOUND( '', #382, .T. )
#255 = CYLINDRICAL_SURFACE( '', #383, 0.500000000000000 )
#256 = FACE_OUTER_BOUND( '', #384, .T. )
#257 = CYLINDRICAL_SURFACE( '', #385, 0.500000000000000 )
#258 = FACE_OUTER_BOUND( '', #386, .T. )
#259 = PLANE( '', #387 )
#260 = FACE_OUTER_BOUND( '', #388, .T. )
#261 = CYLINDRICAL_SURFACE( '', #389, 2.50000000000000 )
#262 = FACE_OUTER_BOUND( '', #390, .T. )
#263 = CYLINDRICAL_SURFACE( '', #391, 0.500000000000000 )
#264 = FACE_OUTER_BOUND( '', #392, .T. )
#265 = CYLINDRICAL_SURFACE( '', #393, 2.50000000000000 )
#266 = EDGE_LOOP( '', ( #394, #395, #396, #397, #398, #399, #400, #401 ) )
#267 = EDGE_LOOP( '', ( #402, #403, #404, #405, #406, #407, #408, #409, #410, #411, #412, #413, #414, #415, #416, #417 ) )
#268 = EDGE_LOOP( '', ( #418, #419, #420, #421, #422, #423, #424, #425 ) )
#269 = EDGE_LOOP( '', ( #426, #427, #428, #429, #430, #431, #432, #433, #434, #435, #436, #437, #438, #439, #440, #441 ) )
#270 = EDGE_LOOP( '', ( #442, #443, #444, #445, #446, #447, #448, #449 ) )
#271 = AXIS2_PLACEMENT_3D( '', #450, #451, #452 )
#272 = EDGE_LOOP( '', ( #453, #454, #455, #456 ) )
#273 = AXIS2_PLACEMENT_3D( '', #457, #458, #459 )
#274 = EDGE_LOOP( '', ( #460, #461, #462, #463 ) )
#275 = AXIS2_PLACEMENT_3D( '', #464, #465, #466 )
#276 = EDGE_LOOP( '', ( #467, #468, #469, #470, #471, #472, #473, #474 ) )
#277 = AXIS2_PLACEMENT_3D( '', #475, #476, #477 )
#278 = EDGE_LOOP( '', ( #478, #479, #480, #481 ) )
#279 = AXIS2_PLACEMENT_3D( '', #482, #483, #484 )
#280 = EDGE_LOOP( '', ( #485, #486, #487, #488 ) )
#281 = AXIS2_PLACEMENT_3D( '', #489, #490, #491 )
#282 = EDGE_LOOP( '', ( #492, #493, #494, #495, #496, #497, #498, #499 ) )
#283 = AXIS2_PLACEMENT_3D( '', #500, #501, #502 )
#284 = EDGE_LOOP( '', ( #503, #504, #505, #506 ) )
#285 = AXIS2_PLACEMENT_3D( '', #507, #508, #509 )
#286 = EDGE_LOOP( '', ( #510, #511, #512, #513 ) )
#287 = AXIS2_PLACEMENT_3D( '', #514, #515, #516 )
#288 = EDGE_LOOP( '', ( #517, #518, #519, #520 ) )
#289 = AXIS2_PLACEMENT_3D( '', #521, #522, #523 )
#290 = EDGE_LOOP( '', ( #524, #525, #526, #527 ) )
#291 = AXIS2_PLACEMENT_3D( '', #528, #529, #530 )
#292 = EDGE_LOOP( '', ( #531, #532, #533, #534 ) )
#293 = AXIS2_PLACEMENT_3D( '', #535, #536, #537 )
#294 = EDGE_LOOP( '', ( #538, #539, #540, #541 ) )
#295 = AXIS2_PLACEMENT_3D( '', #542, #543, #544 )
#296 = EDGE_LOOP( '', ( #545, #546, #547, #548 ) )
#297 = AXIS2_PLACEMENT_3D( '', #549, #550, #551 )
#298 = EDGE_LOOP( '', ( #552, #553, #554, #555, #556, #557, #558, #559, #560, #561, #562, #563, #564, #565, #566, #567 ) )
#299 = AXIS2_PLACEMENT_3D( '', #568, #569, #570 )
#300 = EDGE_LOOP( '', ( #571, #572, #573, #574 ) )
#301 = AXIS2_PLACEMENT_3D( '', #575, #576, #577 )
#302 = EDGE_LOOP( '', ( #578, #579, #580, #581 ) )
#303 = AXIS2_PLACEMENT_3D( '', #582, #583, #584 )
#304 = EDGE_LOOP( '', ( #585, #586, #587, #588 ) )
#305 = AXIS2_PLACEMENT_3D( '', #589, #590, #591 )
#306 = EDGE_LOOP( '', ( #592, #593, #594, #595, #596, #597, #598, #599 ) )
#307 = AXIS2_PLACEMENT_3D( '', #600, #601, #602 )
#308 = EDGE_LOOP( '', ( #603, #604, #605, #606 ) )
#309 = AXIS2_PLACEMENT_3D( '', #607, #608, #609 )
#310 = EDGE_LOOP( '', ( #610, #611, #612, #613 ) )
#311 = AXIS2_PLACEMENT_3D( '', #614, #615, #616 )
#312 = EDGE_LOOP( '', ( #617, #618, #619, #620 ) )
#313 = AXIS2_PLACEMENT_3D( '', #621, #622, #623 )
#314 = EDGE_LOOP( '', ( #624, #625, #626, #627 ) )
#315 = AXIS2_PLACEMENT_3D( '', #628, #629, #630 )
#316 = EDGE_LOOP( '', ( #631, #632, #633, #634 ) )
#317 = AXIS2_PLACEMENT_3D( '', #635, #636, #637 )
#318 = EDGE_LOOP( '', ( #638, #639, #640, #641 ) )
#319 = AXIS2_PLACEMENT_3D( '', #642, #643, #644 )
#320 = EDGE_LOOP( '', ( #645, #646, #647, #648 ) )
#321 = AXIS2_PLACEMENT_3D( '', #649, #650, #651 )
#322 = EDGE_LOOP( '', ( #652, #653, #654, #655, #656, #657, #658, #659, #660, #661, #662, #663, #664, #665, #666, #667 ) )
#323 = AXIS2_PLACEMENT_3D( '', #668, #669, #670 )
#324 = EDGE_LOOP( '', ( #671, #672, #673, #674 ) )
#325 = AXIS2_PLACEMENT_3D( '', #675, #676, #677 )
#326 = EDGE_LOOP( '', ( #678, #679, #680, #681 ) )
#327 = AXIS2_PLACEMENT_3D( '', #682, #683, #684 )
#328 = EDGE_LOOP( '', ( #685, #686, #687, #688 ) )
#329 = AXIS2_PLACEMENT_3D( '', #689, #690, #691 )
#330 = EDGE_LOOP( '', ( #692, #693, #694, #695 ) )
#331 = AXIS2_PLACEMENT_3D( '', #696, #697, #698 )
#332 = EDGE_LOOP( '', ( #699, #700, #701, #702 ) )
#333 = AXIS2_PLACEMENT_3D( '', #703, #704, #705 )
#334 = EDGE_LOOP( '', ( #706, #707, #708, #709 ) )
#335 = AXIS2_PLACEMENT_3D( '', #710, #711, #712 )
#336 = EDGE_LOOP( '', ( #713, #714, #715, #716 ) )
#337 = AXIS2_PLACEMENT_3D( '', #717, #718, #719 )
#338 = EDGE_LOOP( '', ( #720, #721, #722, #723 ) )
#339 = AXIS2_PLACEMENT_3D( '', #724, #725, #726 )
#340 = EDGE_LOOP( '', ( #727, #728, #729, #730 ) )
#341 = AXIS2_PLACEMENT_3D( '', #731, #732, #733 )
#342 = EDGE_LOOP( '', ( #734, #735, #736, #737 ) )
#343 = AXIS2_PLACEMENT_3D( '', #738, #739, #740 )
#344 = EDGE_LOOP( '', ( #741, #742, #743, #744 ) )
#345 = AXIS2_PLACEMENT_3D( '', #745, #746, #747 )
#346 = EDGE_LOOP( '', ( #748, #749, #750, #751 ) )
#347 = AXIS2_PLACEMENT_3D( '', #752, #753, #754 )
#348 = EDGE_LOOP( '', ( #755, #756, #757, #758 ) )
#349 = AXIS2_PLACEMENT_3D( '', #759, #760, #761 )
#350 = EDGE_LOOP( '', ( #762, #763, #764, #765 ) )
#351 = AXIS2_PLACEMENT_3D( '', #766, #767, #768 )
#352 = EDGE_LOOP( '', ( #769, #770, #771, #772 ) )
#353 = AXIS2_PLACEMENT_3D( '', #773, #774, #775 )
#354 = EDGE_LOOP( '', ( #776, #777, #778, #779 ) )
#355 = AXIS2_PLACEMENT_3D( '', #780, #781, #782 )
#356 = EDGE_LOOP( '', ( #783, #784, #785, #786 ) )
#357 = AXIS2_PLACEMENT_3D( '', #787, #788, #789 )
#358 = EDGE_LOOP( '', ( #790, #791, #792, #793 ) )
#359 = AXIS2_PLACEMENT_3D( '', #794, #795, #796 )
#360 = EDGE_LOOP( '', ( #797, #798, #799, #800 ) )
#361 = AXIS2_PLACEMENT_3D( '', #801, #802, #803 )
#362 = EDGE_LOOP( '', ( #804, #805, #806, #807 ) )
#363 = AXIS2_PLACEMENT_3D( '', #808, #809, #810 )
#364 = EDGE_LOOP( '', ( #811, #812, #813, #814 ) )
#365 = AXIS2_PLACEMENT_3D( '', #815, #816, #817 )
#366 = EDGE_LOOP( '', ( #818, #819, #820, #821 ) )
#367 = AXIS2_PLACEMENT_3D( '', #822, #823, #824 )
#368 = EDGE_LOOP( '', ( #825, #826, #827, #828 ) )
#369 = AXIS2_PLACEMENT_3D( '', #829, #830, #831 )
#370 = EDGE_LOOP( '', ( #832, #833, #834, #835 ) )
#371 = AXIS2_PLACEMENT_3D( '', #836, #837, #838 )
#372 = EDGE_LOOP( '', ( #839, #840, #841, #842 ) )
#373 = AXIS2_PLACEMENT_3D( '', #843, #844, #845 )
#374 = EDGE_LOOP( '', ( #846, #847, #848, #849 ) )
#375 = AXIS2_PLACEMENT_3D( '', #850, #851, #852 )
#376 = EDGE_LOOP( '', ( #853, #854, #855, #856 ) )
#377 = AXIS2_PLACEMENT_3D( '', #857, #858, #859 )
#378 = EDGE_LOOP( '', ( #860, #861, #862, #863 ) )
#379 = AXIS2_PLACEMENT_3D( '', #864, #865, #866 )
#380 = EDGE_LOOP( '', ( #867, #868, #869, #870 ) )
#381 = AXIS2_PLACEMENT_3D( '', #871, #872, #873 )
#382 = EDGE_LOOP( '', ( #874, #875, #876, #877 ) )
#383 = AXIS2_PLACEMENT_3D( '', #878, #879, #880 )
#384 = EDGE_LOOP( '', ( #881, #882, #883, #884 ) )
#385 = AXIS2_PLACEMENT_3D( '', #885, #886, #887 )
#386 = EDGE_LOOP( '', ( #888, #889, #890, #891 ) )
#387 = AXIS2_PLACEMENT_3D( '', #892, #893, #894 )
#388 = EDGE_LOOP( '', ( #895, #896, #897, #898 ) )
#389 = AXIS2_PLACEMENT_3D( '', #899, #900, #901 )
#390 = EDGE_LOOP( '', ( #902, #903, #904, #905 ) )
#391 = AXIS2_PLACEMENT_3D( '', #906, #907, #908 )
#392 = EDGE_LOOP( '', ( #909, #910, #911, #912 ) )
#393 = AXIS2_PLACEMENT_3D( '', #913, #914, #915 )
#394 = ORIENTED_EDGE( '', *, *, #916, .F. )
#395 = ORIENTED_EDGE( '', *, *, #917, .T. )
#396 = ORIENTED_EDGE( '', *, *, #918, .T. )
#397 = ORIENTED_EDGE( '', *, *, #919, .T. )
#398 = ORIENTED_EDGE( '', *, *, #920, .T. )
#399 = ORIENTED_EDGE( '', *, *, #921, .T. )
#400 = ORIENTED_EDGE( '', *, *, #922, .T. )
#401 = ORIENTED_EDGE( '', *, *, #923, .T. )
#402 = ORIENTED_EDGE( '', *, *, #924, .F. )
#403 = ORIENTED_EDGE( '', *, *, #925, .T. )
#404 = ORIENTED_EDGE( '', *, *, #926, .F. )
#405 = ORIENTED_EDGE( '', *, *, #927, .F. )
#406 = ORIENTED_EDGE( '', *, *, #928, .F. )
#407 = ORIENTED_EDGE( '', *, *, #929, .F. )
#408 = ORIENTED_EDGE( '', *, *, #930, .T. )
#409 = ORIENTED_EDGE( '', *, *, #931, .F. )
#410 = ORIENTED_EDGE( '', *, *, #932, .F. )
#411 = ORIENTED_EDGE( '', *, *, #933, .F. )
#412 = ORIENTED_EDGE( '', *, *, #934, .T. )
#413 = ORIENTED_EDGE( '', *, *, #935, .F. )
#414 = ORIENTED_EDGE( '', *, *, #936, .F. )
#415 = ORIENTED_EDGE( '', *, *, #937, .T. )
#416 = ORIENTED_EDGE( '', *, *, #938, .F. )
#417 = ORIENTED_EDGE( '', *, *, #939, .F. )
#418 = ORIENTED_EDGE( '', *, *, #940, .T. )
#419 = ORIENTED_EDGE( '', *, *, #941, .T. )
#420 = ORIENTED_EDGE( '', *, *, #942, .F. )
#421 = ORIENTED_EDGE( '', *, *, #943, .F. )
#422 = ORIENTED_EDGE( '', *, *, #944, .F. )
#423 = ORIENTED_EDGE( '', *, *, #945, .T. )
#424 = ORIENTED_EDGE( '', *, *, #946, .T. )
#425 = ORIENTED_EDGE( '', *, *, #947, .T. )
#426 = ORIENTED_EDGE( '', *, *, #948, .F. )
#427 = ORIENTED_EDGE( '', *, *, #949, .T. )
#428 = ORIENTED_EDGE( '', *, *, #950, .F. )
#429 = ORIENTED_EDGE( '', *, *, #951, .T. )
#430 = ORIENTED_EDGE( '', *, *, #952, .F. )
#431 = ORIENTED_EDGE( '', *, *, #953, .T. )
#432 = ORIENTED_EDGE( '', *, *, #954, .F. )
#433 = ORIENTED_EDGE( '', *, *, #955, .F. )
#434 = ORIENTED_EDGE( '', *, *, #956, .F. )
#435 = ORIENTED_EDGE( '', *, *, #957, .F. )
#436 = ORIENTED_EDGE( '', *, *, #958, .F. )
#437 = ORIENTED_EDGE( '', *, *, #959, .T. )
#438 = ORIENTED_EDGE( '', *, *, #960, .F. )
#439 = ORIENTED_EDGE( '', *, *, #961, .T. )
#440 = ORIENTED_EDGE( '', *, *, #962, .F. )
#441 = ORIENTED_EDGE( '', *, *, #963, .F. )
#442 = ORIENTED_EDGE( '', *, *, #964, .T. )
#443 = ORIENTED_EDGE( '', *, *, #965, .T. )
#444 = ORIENTED_EDGE( '', *, *, #966, .F. )
#445 = ORIENTED_EDGE( '', *, *, #967, .F. )
#446 = ORIENTED_EDGE( '', *, *, #968, .F. )
#447 = ORIENTED_EDGE( '', *, *, #969, .T. )
#448 = ORIENTED_EDGE( '', *, *, #970, .T. )
#449 = ORIENTED_EDGE( '', *, *, #971, .T. )
#450 = CARTESIAN_POINT( '', ( -79.4177471747059, 105.905777007040, 0.000000000000000 ) )
#451 = DIRECTION( '', ( 0.000000000000000, 0.000000000000000, 1.00000000000000 ) )
#452 = DIRECTION( '', ( 1.00000000000000, 0.000000000000000, 0.000000000000000 ) )
#453 = ORIENTED_EDGE( '', *, *, #972, .F. )
#454 = ORIENTED_EDGE( '', *, *, #973, .F. )
#455 = ORIENTED_EDGE( '', *, *, #941, .F. )
#456 = ORIENTED_EDGE( '', *, *, #974, .F. )
#457 = CARTESIAN_POINT( '', ( -9.41263157894742, 48.1557770070401, 1.00000000000000 ) )
#458 = DIRECTION( '', ( 0.000000000000000, 0.000000000000000, -1.00000000000000 ) )
#459 = DIRECTION( '', ( -1.00000000000000, 0.000000000000000, 0.000000000000000 ) )
#460 = ORIENTED_EDGE( '', *, *, #975, .T. )
#461 = ORIENTED_EDGE( '', *, *, #916, .T. )
#462 = ORIENTED_EDGE( '', *, *, #976, .T. )
#463 = ORIENTED_EDGE( '', *, *, #977, .T. )
#464 = CARTESIAN_POINT( '', ( -89.2589391209214, 20.1557770070404, 169.294561705598 ) )
#465 = DIRECTION( '', ( 0.000000000000000, 1.00000000000000, 0.000000000000000 ) )
#466 = DIRECTION( '', ( 0.000000000000000, 0.000000000000000, 1.00000000000000 ) )
#467 = ORIENTED_EDGE( '', *, *, #978, .T. )
#468 = ORIENTED_EDGE( '', *, *, #977, .F. )
#469 = ORIENTED_EDGE( '', *, *, #979, .T. )
#470 = ORIENTED_EDGE( '', *, *, #980, .F. )
#471 = ORIENTED_EDGE( '', *, *, #981, .T. )
#472 = ORIENTED_EDGE( '', *, *, #982, .T. )
#473 = ORIENTED_EDGE( '', *, *, #983, .T. )
#474 = ORIENTED_EDGE( '', *, *, #984, .F. )
#475 = CARTESIAN_POINT( '', ( -79.4177471747059, 105.905777007040, -1.00000000000000 ) )
#476 = DIRECTION( '', ( 0.000000000000000, 0.000000000000000, 1.00000000000000 ) )
#477 = DIRECTION( '', ( 1.00000000000000, 0.000000000000000, 0.000000000000000 ) )
#478 = ORIENTED_EDGE( '', *, *, #976, .F. )
#479 = ORIENTED_EDGE( '', *, *, #923, .F. )
#480 = ORIENTED_EDGE( '', *, *, #985, .F. )
#481 = ORIENTED_EDGE( '', *, *, #979, .F. )
#482 = CARTESIAN_POINT( '', ( -76.9177471747059, 22.4057770070404, -1.00000000000000 ) )
#483 = DIRECTION( '', ( 0.000000000000000, 0.000000000000000, 1.00000000000000 ) )
#484 = DIRECTION( '', ( 1.00000000000000, 0.000000000000000, 0.000000000000000 ) )
#485 = ORIENTED_EDGE( '', *, *, #986, .T. )
#486 = ORIENTED_EDGE( '', *, *, #974, .T. )
#487 = ORIENTED_EDGE( '', *, *, #940, .F. )
#488 = ORIENTED_EDGE( '', *, *, #987, .F. )
#489 = CARTESIAN_POINT( '', ( -8.41263157894742, 40.7184364275384, 1.00000000000000 ) )
#490 = DIRECTION( '', ( -1.00000000000000, 0.000000000000000, 0.000000000000000 ) )
#491 = DIRECTION( '', ( 0.000000000000000, 0.000000000000000, 1.00000000000000 ) )
#492 = ORIENTED_EDGE( '', *, *, #988, .F. )
#493 = ORIENTED_EDGE( '', *, *, #989, .T. )
#494 = ORIENTED_EDGE( '', *, *, #990, .T. )
#495 = ORIENTED_EDGE( '', *, *, #991, .F. )
#496 = ORIENTED_EDGE( '', *, *, #992, .T. )
#497 = ORIENTED_EDGE( '', *, *, #972, .T. )
#498 = ORIENTED_EDGE( '', *, *, #986, .F. )
#499 = ORIENTED_EDGE( '', *, *, #993, .F. )
#500 = CARTESIAN_POINT( '', ( -68.4126315789474, 49.4057770070401, 1.00000000000000 ) )
#501 = DIRECTION( '', ( 0.000000000000000, 0.000000000000000, -1.00000000000000 ) )
#502 = DIRECTION( '', ( 0.000000000000000, -1.00000000000000, 0.000000000000000 ) )
#503 = ORIENTED_EDGE( '', *, *, #947, .F. )
#504 = ORIENTED_EDGE( '', *, *, #994, .F. )
#505 = ORIENTED_EDGE( '', *, *, #993, .T. )
#506 = ORIENTED_EDGE( '', *, *, #987, .T. )
#507 = CARTESIAN_POINT( '', ( -7.91263157894742, 40.7184364275384, 1.00000000000000 ) )
#508 = DIRECTION( '', ( 0.000000000000000, -1.00000000000000, 0.000000000000000 ) )
#509 = DIRECTION( '', ( 0.000000000000000, 0.000000000000000, -1.00000000000000 ) )
#510 = ORIENTED_EDGE( '', *, *, #995, .F. )
#511 = ORIENTED_EDGE( '', *, *, #996, .T. )
#512 = ORIENTED_EDGE( '', *, *, #968, .T. )
#513 = ORIENTED_EDGE( '', *, *, #997, .F. )
#514 = CARTESIAN_POINT( '', ( -38.4126315789474, 94.6557770070399, 1.00000000000000 ) )
#515 = DIRECTION( '', ( 2.31296463463574E-016, -1.00000000000000, 0.000000000000000 ) )
#516 = DIRECTION( '', ( 0.000000000000000, 0.000000000000000, -1.00000000000000 ) )
#517 = ORIENTED_EDGE( '', *, *, #998, .F. )
#518 = ORIENTED_EDGE( '', *, *, #999, .F. )
#519 = ORIENTED_EDGE( '', *, *, #969, .F. )
#520 = ORIENTED_EDGE( '', *, *, #996, .F. )
#521 = CARTESIAN_POINT( '', ( -39.9126315789474, 92.6557770070399, 1.00000000000000 ) )
#522 = DIRECTION( '', ( 0.000000000000000, 0.000000000000000, 1.00000000000000 ) )
#523 = DIRECTION( '', ( 1.00000000000000, 0.000000000000000, 0.000000000000000 ) )
#524 = ORIENTED_EDGE( '', *, *, #1000, .T. )
#525 = ORIENTED_EDGE( '', *, *, #997, .T. )
#526 = ORIENTED_EDGE( '', *, *, #967, .T. )
#527 = ORIENTED_EDGE( '', *, *, #1001, .T. )
#528 = CARTESIAN_POINT( '', ( -68.4126315789474, 94.4057770070399, 1.00000000000000 ) )
#529 = DIRECTION( '', ( 0.000000000000000, 0.000000000000000, -1.00000000000000 ) )
#530 = DIRECTION( '', ( -1.00000000000000, 0.000000000000000, 0.000000000000000 ) )
#531 = ORIENTED_EDGE( '', *, *, #1002, .F. )
#532 = ORIENTED_EDGE( '', *, *, #1003, .T. )
#533 = ORIENTED_EDGE( '', *, *, #936, .T. )
#534 = ORIENTED_EDGE( '', *, *, #1004, .T. )
#535 = CARTESIAN_POINT( '', ( -37.9126315789474, 31.1557770070404, 1.00000000000000 ) )
#536 = DIRECTION( '', ( -1.00000000000000, 0.000000000000000, 0.000000000000000 ) )
#537 = DIRECTION( '', ( 0.000000000000000, 0.000000000000000, 1.00000000000000 ) )
#538 = ORIENTED_EDGE( '', *, *, #1005, .F. )
#539 = ORIENTED_EDGE( '', *, *, #1006, .F. )
#540 = ORIENTED_EDGE( '', *, *, #937, .F. )
#541 = ORIENTED_EDGE( '', *, *, #1003, .F. )
#542 = CARTESIAN_POINT( '', ( -39.9126315789474, 33.1557770070404, 1.00000000000000 ) )
#543 = DIRECTION( '', ( 0.000000000000000, 0.000000000000000, -1.00000000000000 ) )
#544 = DIRECTION( '', ( -1.00000000000000, 0.000000000000000, 0.000000000000000 ) )
#545 = ORIENTED_EDGE( '', *, *, #1004, .F. )
#546 = ORIENTED_EDGE( '', *, *, #935, .T. )
#547 = ORIENTED_EDGE( '', *, *, #1007, .F. )
#548 = ORIENTED_EDGE( '', *, *, #1008, .F. )
#549 = CARTESIAN_POINT( '', ( -68.4126315789474, 40.1557770070402, 1.00000000000000 ) )
#550 = DIRECTION( '', ( 0.000000000000000, 1.00000000000000, 0.000000000000000 ) )
#551 = DIRECTION( '', ( 1.00000000000000, 0.000000000000000, 0.000000000000000 ) )
#552 = ORIENTED_EDGE( '', *, *, #1009, .T. )
#553 = ORIENTED_EDGE( '', *, *, #1005, .T. )
#554 = ORIENTED_EDGE( '', *, *, #1002, .T. )
#555 = ORIENTED_EDGE( '', *, *, #1008, .T. )
#556 = ORIENTED_EDGE( '', *, *, #1010, .F. )
#557 = ORIENTED_EDGE( '', *, *, #1011, .T. )
#558 = ORIENTED_EDGE( '', *, *, #1012, .F. )
#559 = ORIENTED_EDGE( '', *, *, #1013, .T. )
#560 = ORIENTED_EDGE( '', *, *, #1014, .F. )
#561 = ORIENTED_EDGE( '', *, *, #1015, .T. )
#562 = ORIENTED_EDGE( '', *, *, #1016, .F. )
#563 = ORIENTED_EDGE( '', *, *, #1017, .T. )
#564 = ORIENTED_EDGE( '', *, *, #1018, .T. )
#565 = ORIENTED_EDGE( '', *, *, #1019, .T. )
#566 = ORIENTED_EDGE( '', *, *, #1020, .T. )
#567 = ORIENTED_EDGE( '', *, *, #1021, .F. )
#568 = CARTESIAN_POINT( '', ( -68.4126315789474, 58.4057770070400, 1.00000000000000 ) )
#569 = DIRECTION( '', ( 0.000000000000000, 0.000000000000000, -1.00000000000000 ) )
#570 = DIRECTION( '', ( 0.000000000000000, -1.00000000000000, 0.000000000000000 ) )
#571 = ORIENTED_EDGE( '', *, *, #1022, .F. )
#572 = ORIENTED_EDGE( '', *, *, #1023, .F. )
#573 = ORIENTED_EDGE( '', *, *, #1024, .T. )
#574 = ORIENTED_EDGE( '', *, *, #957, .T. )
#575 = CARTESIAN_POINT( '', ( 21.5873684210526, 67.6557770070399, 1.00000000000000 ) )
#576 = DIRECTION( '', ( 1.25285584376103E-016, -1.00000000000000, 0.000000000000000 ) )
#577 = DIRECTION( '', ( 0.000000000000000, 0.000000000000000, -1.00000000000000 ) )
#578 = ORIENTED_EDGE( '', *, *, #953, .F. )
#579 = ORIENTED_EDGE( '', *, *, #1025, .T. )
#580 = ORIENTED_EDGE( '', *, *, #1026, .T. )
#581 = ORIENTED_EDGE( '', *, *, #1027, .T. )
#582 = CARTESIAN_POINT( '', ( -68.4126315789474, 85.6557770070399, 1.00000000000000 ) )
#583 = DIRECTION( '', ( 0.000000000000000, 1.00000000000000, 0.000000000000000 ) )
#584 = DIRECTION( '', ( 1.00000000000000, 0.000000000000000, 0.000000000000000 ) )
#585 = ORIENTED_EDGE( '', *, *, #1028, .F. )
#586 = ORIENTED_EDGE( '', *, *, #955, .T. )
#587 = ORIENTED_EDGE( '', *, *, #1029, .F. )
#588 = ORIENTED_EDGE( '', *, *, #1030, .F. )
#589 = CARTESIAN_POINT( '', ( -68.4126315789474, 67.1557770070399, 1.00000000000000 ) )
#590 = DIRECTION( '', ( 0.000000000000000, 1.00000000000000, 0.000000000000000 ) )
#591 = DIRECTION( '', ( 1.00000000000000, 0.000000000000000, 0.000000000000000 ) )
#592 = ORIENTED_EDGE( '', *, *, #1031, .F. )
#593 = ORIENTED_EDGE( '', *, *, #998, .T. )
#594 = ORIENTED_EDGE( '', *, *, #995, .T. )
#595 = ORIENTED_EDGE( '', *, *, #1000, .F. )
#596 = ORIENTED_EDGE( '', *, *, #1032, .T. )
#597 = ORIENTED_EDGE( '', *, *, #1033, .T. )
#598 = ORIENTED_EDGE( '', *, *, #1034, .F. )
#599 = ORIENTED_EDGE( '', *, *, #1035, .F. )
#600 = CARTESIAN_POINT( '', ( -68.4126315789474, 94.4057770070399, 1.00000000000000 ) )
#601 = DIRECTION( '', ( 0.000000000000000, 0.000000000000000, -1.00000000000000 ) )
#602 = DIRECTION( '', ( 0.000000000000000, -1.00000000000000, 0.000000000000000 ) )
#603 = ORIENTED_EDGE( '', *, *, #1021, .T. )
#604 = ORIENTED_EDGE( '', *, *, #1036, .T. )
#605 = ORIENTED_EDGE( '', *, *, #939, .T. )
#606 = ORIENTED_EDGE( '', *, *, #1037, .T. )
#607 = CARTESIAN_POINT( '', ( -68.4126315789474, 31.4057770070404, 1.00000000000000 ) )
#608 = DIRECTION( '', ( 0.000000000000000, 0.000000000000000, -1.00000000000000 ) )
#609 = DIRECTION( '', ( -1.00000000000000, 0.000000000000000, 0.000000000000000 ) )
#610 = ORIENTED_EDGE( '', *, *, #1038, .T. )
#611 = ORIENTED_EDGE( '', *, *, #1039, .T. )
#612 = ORIENTED_EDGE( '', *, *, #963, .T. )
#613 = ORIENTED_EDGE( '', *, *, #1040, .T. )
#614 = CARTESIAN_POINT( '', ( -68.4126315789474, 76.4057770070398, 1.00000000000000 ) )
#615 = DIRECTION( '', ( 0.000000000000000, 0.000000000000000, -1.00000000000000 ) )
#616 = DIRECTION( '', ( -1.00000000000000, 0.000000000000000, 0.000000000000000 ) )
#617 = ORIENTED_EDGE( '', *, *, #1019, .F. )
#618 = ORIENTED_EDGE( '', *, *, #1041, .F. )
#619 = ORIENTED_EDGE( '', *, *, #925, .F. )
#620 = ORIENTED_EDGE( '', *, *, #1042, .F. )
#621 = CARTESIAN_POINT( '', ( -39.4126315789474, 32.6557770070404, 1.00000000000000 ) )
#622 = DIRECTION( '', ( 0.000000000000000, 0.000000000000000, 1.00000000000000 ) )
#623 = DIRECTION( '', ( 1.00000000000000, 0.000000000000000, 0.000000000000000 ) )
#624 = ORIENTED_EDGE( '', *, *, #1043, .F. )
#625 = ORIENTED_EDGE( '', *, *, #1044, .F. )
#626 = ORIENTED_EDGE( '', *, *, #949, .F. )
#627 = ORIENTED_EDGE( '', *, *, #1045, .F. )
#628 = CARTESIAN_POINT( '', ( -9.41263157894738, 77.6557770070398, 1.00000000000000 ) )
#629 = DIRECTION( '', ( 0.000000000000000, 0.000000000000000, 1.00000000000000 ) )
#630 = DIRECTION( '', ( 1.00000000000000, 0.000000000000000, 0.000000000000000 ) )
#631 = ORIENTED_EDGE( '', *, *, #971, .F. )
#632 = ORIENTED_EDGE( '', *, *, #1046, .F. )
#633 = ORIENTED_EDGE( '', *, *, #1035, .T. )
#634 = ORIENTED_EDGE( '', *, *, #1047, .T. )
#635 = CARTESIAN_POINT( '', ( -37.9126315789474, 85.7006750403611, 1.00000000000000 ) )
#636 = DIRECTION( '', ( 0.000000000000000, -1.00000000000000, 0.000000000000000 ) )
#637 = DIRECTION( '', ( 0.000000000000000, 0.000000000000000, -1.00000000000000 ) )
#638 = ORIENTED_EDGE( '', *, *, #984, .T. )
#639 = ORIENTED_EDGE( '', *, *, #1048, .T. )
#640 = ORIENTED_EDGE( '', *, *, #918, .F. )
#641 = ORIENTED_EDGE( '', *, *, #1049, .T. )
#642 = CARTESIAN_POINT( '', ( 45.0443862627252, 19.9057770070404, -1.00000000000000 ) )
#643 = DIRECTION( '', ( 1.00000000000000, 0.000000000000000, 0.000000000000000 ) )
#644 = DIRECTION( '', ( 0.000000000000000, 1.00000000000000, 0.000000000000000 ) )
#645 = ORIENTED_EDGE( '', *, *, #970, .F. )
#646 = ORIENTED_EDGE( '', *, *, #999, .T. )
#647 = ORIENTED_EDGE( '', *, *, #1031, .T. )
#648 = ORIENTED_EDGE( '', *, *, #1046, .T. )
#649 = CARTESIAN_POINT( '', ( -37.9126315789474, 94.6557770070399, 1.00000000000000 ) )
#650 = DIRECTION( '', ( 1.00000000000000, 0.000000000000000, 0.000000000000000 ) )
#651 = DIRECTION( '', ( 0.000000000000000, 1.00000000000000, 0.000000000000000 ) )
#652 = ORIENTED_EDGE( '', *, *, #1050, .T. )
#653 = ORIENTED_EDGE( '', *, *, #1051, .T. )
#654 = ORIENTED_EDGE( '', *, *, #1052, .T. )
#655 = ORIENTED_EDGE( '', *, *, #1053, .F. )
#656 = ORIENTED_EDGE( '', *, *, #1054, .T. )
#657 = ORIENTED_EDGE( '', *, *, #1023, .T. )
#658 = ORIENTED_EDGE( '', *, *, #1055, .F. )
#659 = ORIENTED_EDGE( '', *, *, #1030, .T. )
#660 = ORIENTED_EDGE( '', *, *, #1056, .T. )
#661 = ORIENTED_EDGE( '', *, *, #1026, .F. )
#662 = ORIENTED_EDGE( '', *, *, #1057, .F. )
#663 = ORIENTED_EDGE( '', *, *, #1058, .F. )
#664 = ORIENTED_EDGE( '', *, *, #1059, .T. )
#665 = ORIENTED_EDGE( '', *, *, #1043, .T. )
#666 = ORIENTED_EDGE( '', *, *, #1060, .T. )
#667 = ORIENTED_EDGE( '', *, *, #1038, .F. )
#668 = CARTESIAN_POINT( '', ( -68.4126315789474, 85.4057770070399, 1.00000000000000 ) )
#669 = DIRECTION( '', ( 0.000000000000000, 0.000000000000000, -1.00000000000000 ) )
#670 = DIRECTION( '', ( 0.000000000000000, -1.00000000000000, 0.000000000000000 ) )
#671 = ORIENTED_EDGE( '', *, *, #1061, .F. )
#672 = ORIENTED_EDGE( '', *, *, #1057, .T. )
#673 = ORIENTED_EDGE( '', *, *, #1025, .F. )
#674 = ORIENTED_EDGE( '', *, *, #952, .T. )
#675 = CARTESIAN_POINT( '', ( -68.4126315789474, 85.4057770070399, 1.00000000000000 ) )
#676 = DIRECTION( '', ( 0.000000000000000, 0.000000000000000, -1.00000000000000 ) )
#677 = DIRECTION( '', ( -1.00000000000000, 0.000000000000000, 0.000000000000000 ) )
#678 = ORIENTED_EDGE( '', *, *, #1055, .T. )
#679 = ORIENTED_EDGE( '', *, *, #1022, .T. )
#680 = ORIENTED_EDGE( '', *, *, #956, .T. )
#681 = ORIENTED_EDGE( '', *, *, #1028, .T. )
#682 = CARTESIAN_POINT( '', ( -68.4126315789474, 67.4057770070399, 1.00000000000000 ) )
#683 = DIRECTION( '', ( 0.000000000000000, 0.000000000000000, -1.00000000000000 ) )
#684 = DIRECTION( '', ( -1.00000000000000, 0.000000000000000, 0.000000000000000 ) )
#685 = ORIENTED_EDGE( '', *, *, #958, .T. )
#686 = ORIENTED_EDGE( '', *, *, #1024, .F. )
#687 = ORIENTED_EDGE( '', *, *, #1054, .F. )
#688 = ORIENTED_EDGE( '', *, *, #1062, .T. )
#689 = CARTESIAN_POINT( '', ( 21.5873684210525, 76.4057770070398, 1.00000000000000 ) )
#690 = DIRECTION( '', ( 0.000000000000000, 0.000000000000000, -1.00000000000000 ) )
#691 = DIRECTION( '', ( -1.00000000000000, 0.000000000000000, 0.000000000000000 ) )
#692 = ORIENTED_EDGE( '', *, *, #1063, .F. )
#693 = ORIENTED_EDGE( '', *, *, #1015, .F. )
#694 = ORIENTED_EDGE( '', *, *, #1064, .T. )
#695 = ORIENTED_EDGE( '', *, *, #929, .T. )
#696 = CARTESIAN_POINT( '', ( 21.5873684210526, 40.6557770070403, 1.00000000000000 ) )
#697 = DIRECTION( '', ( 7.70988211545248E-017, -1.00000000000000, 0.000000000000000 ) )
#698 = DIRECTION( '', ( 0.000000000000000, 0.000000000000000, -1.00000000000000 ) )
#699 = ORIENTED_EDGE( '', *, *, #954, .T. )
#700 = ORIENTED_EDGE( '', *, *, #1027, .F. )
#701 = ORIENTED_EDGE( '', *, *, #1056, .F. )
#702 = ORIENTED_EDGE( '', *, *, #1029, .T. )
#703 = CARTESIAN_POINT( '', ( 21.5873684210525, 76.4057770070398, 1.00000000000000 ) )
#704 = DIRECTION( '', ( 0.000000000000000, 0.000000000000000, -1.00000000000000 ) )
#705 = DIRECTION( '', ( -1.00000000000000, 0.000000000000000, 0.000000000000000 ) )
#706 = ORIENTED_EDGE( '', *, *, #1060, .F. )
#707 = ORIENTED_EDGE( '', *, *, #1045, .T. )
#708 = ORIENTED_EDGE( '', *, *, #948, .T. )
#709 = ORIENTED_EDGE( '', *, *, #1039, .F. )
#710 = CARTESIAN_POINT( '', ( -8.41263157894738, 76.6557770070398, 1.00000000000000 ) )
#711 = DIRECTION( '', ( 1.15648231731787E-016, -1.00000000000000, 0.000000000000000 ) )
#712 = DIRECTION( '', ( 0.000000000000000, 0.000000000000000, -1.00000000000000 ) )
#713 = ORIENTED_EDGE( '', *, *, #938, .T. )
#714 = ORIENTED_EDGE( '', *, *, #1006, .T. )
#715 = ORIENTED_EDGE( '', *, *, #1009, .F. )
#716 = ORIENTED_EDGE( '', *, *, #1037, .F. )
#717 = CARTESIAN_POINT( '', ( -68.4126315789474, 31.1557770070404, 1.00000000000000 ) )
#718 = DIRECTION( '', ( 0.000000000000000, 1.00000000000000, 0.000000000000000 ) )
#719 = DIRECTION( '', ( 1.00000000000000, 0.000000000000000, 0.000000000000000 ) )
#720 = ORIENTED_EDGE( '', *, *, #962, .T. )
#721 = ORIENTED_EDGE( '', *, *, #1065, .T. )
#722 = ORIENTED_EDGE( '', *, *, #1050, .F. )
#723 = ORIENTED_EDGE( '', *, *, #1040, .F. )
#724 = CARTESIAN_POINT( '', ( -68.4126315789474, 76.1557770070398, 1.00000000000000 ) )
#725 = DIRECTION( '', ( 0.000000000000000, 1.00000000000000, 0.000000000000000 ) )
#726 = DIRECTION( '', ( 1.00000000000000, 0.000000000000000, 0.000000000000000 ) )
#727 = ORIENTED_EDGE( '', *, *, #1066, .F. )
#728 = ORIENTED_EDGE( '', *, *, #931, .T. )
#729 = ORIENTED_EDGE( '', *, *, #1067, .F. )
#730 = ORIENTED_EDGE( '', *, *, #1013, .F. )
#731 = CARTESIAN_POINT( '', ( -68.4126315789474, 58.1557770070400, 1.00000000000000 ) )
#732 = DIRECTION( '', ( 0.000000000000000, 1.00000000000000, 0.000000000000000 ) )
#733 = DIRECTION( '', ( 1.00000000000000, 0.000000000000000, 0.000000000000000 ) )
#734 = ORIENTED_EDGE( '', *, *, #1068, .F. )
#735 = ORIENTED_EDGE( '', *, *, #1011, .F. )
#736 = ORIENTED_EDGE( '', *, *, #1069, .T. )
#737 = ORIENTED_EDGE( '', *, *, #933, .T. )
#738 = CARTESIAN_POINT( '', ( 21.5873684210526, 58.6557770070400, 1.00000000000000 ) )
#739 = DIRECTION( '', ( 1.15648231731787E-016, -1.00000000000000, 0.000000000000000 ) )
#740 = DIRECTION( '', ( 0.000000000000000, 0.000000000000000, -1.00000000000000 ) )
#741 = ORIENTED_EDGE( '', *, *, #942, .T. )
#742 = ORIENTED_EDGE( '', *, *, #973, .T. )
#743 = ORIENTED_EDGE( '', *, *, #992, .F. )
#744 = ORIENTED_EDGE( '', *, *, #1070, .F. )
#745 = CARTESIAN_POINT( '', ( -68.4126315789474, 49.1557770070401, 1.00000000000000 ) )
#746 = DIRECTION( '', ( 0.000000000000000, 1.00000000000000, 0.000000000000000 ) )
#747 = DIRECTION( '', ( 1.00000000000000, 0.000000000000000, 0.000000000000000 ) )
#748 = ORIENTED_EDGE( '', *, *, #989, .F. )
#749 = ORIENTED_EDGE( '', *, *, #1071, .F. )
#750 = ORIENTED_EDGE( '', *, *, #945, .F. )
#751 = ORIENTED_EDGE( '', *, *, #1072, .F. )
#752 = CARTESIAN_POINT( '', ( -9.91263157894742, 47.6557770070401, 1.00000000000000 ) )
#753 = DIRECTION( '', ( 0.000000000000000, 0.000000000000000, 1.00000000000000 ) )
#754 = DIRECTION( '', ( 1.00000000000000, 0.000000000000000, 0.000000000000000 ) )
#755 = ORIENTED_EDGE( '', *, *, #1051, .F. )
#756 = ORIENTED_EDGE( '', *, *, #1065, .F. )
#757 = ORIENTED_EDGE( '', *, *, #961, .F. )
#758 = ORIENTED_EDGE( '', *, *, #1073, .F. )
#759 = CARTESIAN_POINT( '', ( -9.91263157894738, 78.1557770070398, 1.00000000000000 ) )
#760 = DIRECTION( '', ( 0.000000000000000, 0.000000000000000, -1.00000000000000 ) )
#761 = DIRECTION( '', ( -1.00000000000000, 0.000000000000000, 0.000000000000000 ) )
#762 = ORIENTED_EDGE( '', *, *, #946, .F. )
#763 = ORIENTED_EDGE( '', *, *, #1071, .T. )
#764 = ORIENTED_EDGE( '', *, *, #988, .T. )
#765 = ORIENTED_EDGE( '', *, *, #994, .T. )
#766 = CARTESIAN_POINT( '', ( -7.91263157894742, 49.6557770070401, 1.00000000000000 ) )
#767 = DIRECTION( '', ( 1.00000000000000, 0.000000000000000, 0.000000000000000 ) )
#768 = DIRECTION( '', ( 0.000000000000000, 1.00000000000000, 0.000000000000000 ) )
#769 = ORIENTED_EDGE( '', *, *, #926, .T. )
#770 = ORIENTED_EDGE( '', *, *, #1041, .T. )
#771 = ORIENTED_EDGE( '', *, *, #1018, .F. )
#772 = ORIENTED_EDGE( '', *, *, #1074, .T. )
#773 = CARTESIAN_POINT( '', ( -38.4126315789474, 40.2043351978870, 1.00000000000000 ) )
#774 = DIRECTION( '', ( 1.00000000000000, 0.000000000000000, 0.000000000000000 ) )
#775 = DIRECTION( '', ( 0.000000000000000, 1.00000000000000, 0.000000000000000 ) )
#776 = ORIENTED_EDGE( '', *, *, #950, .T. )
#777 = ORIENTED_EDGE( '', *, *, #1044, .T. )
#778 = ORIENTED_EDGE( '', *, *, #1059, .F. )
#779 = ORIENTED_EDGE( '', *, *, #1075, .F. )
#780 = CARTESIAN_POINT( '', ( -8.41263157894738, 85.2702992175271, 1.00000000000000 ) )
#781 = DIRECTION( '', ( 1.00000000000000, 0.000000000000000, 0.000000000000000 ) )
#782 = DIRECTION( '', ( 0.000000000000000, 1.00000000000000, 0.000000000000000 ) )
#783 = ORIENTED_EDGE( '', *, *, #930, .F. )
#784 = ORIENTED_EDGE( '', *, *, #1064, .F. )
#785 = ORIENTED_EDGE( '', *, *, #1014, .T. )
#786 = ORIENTED_EDGE( '', *, *, #1067, .T. )
#787 = CARTESIAN_POINT( '', ( 21.5873684210526, 49.4057770070401, 1.00000000000000 ) )
#788 = DIRECTION( '', ( 0.000000000000000, 0.000000000000000, -1.00000000000000 ) )
#789 = DIRECTION( '', ( -1.00000000000000, 0.000000000000000, 0.000000000000000 ) )
#790 = ORIENTED_EDGE( '', *, *, #1052, .F. )
#791 = ORIENTED_EDGE( '', *, *, #1073, .T. )
#792 = ORIENTED_EDGE( '', *, *, #960, .T. )
#793 = ORIENTED_EDGE( '', *, *, #1076, .F. )
#794 = CARTESIAN_POINT( '', ( -7.91263157894738, 76.1557770070398, 1.00000000000000 ) )
#795 = DIRECTION( '', ( -1.00000000000000, 0.000000000000000, 0.000000000000000 ) )
#796 = DIRECTION( '', ( 0.000000000000000, 0.000000000000000, 1.00000000000000 ) )
#797 = ORIENTED_EDGE( '', *, *, #990, .F. )
#798 = ORIENTED_EDGE( '', *, *, #1072, .T. )
#799 = ORIENTED_EDGE( '', *, *, #944, .T. )
#800 = ORIENTED_EDGE( '', *, *, #1077, .F. )
#801 = CARTESIAN_POINT( '', ( -8.41263157894742, 49.6557770070401, 1.00000000000000 ) )
#802 = DIRECTION( '', ( 1.15648231731787E-016, -1.00000000000000, 0.000000000000000 ) )
#803 = DIRECTION( '', ( 0.000000000000000, 0.000000000000000, -1.00000000000000 ) )
#804 = ORIENTED_EDGE( '', *, *, #1053, .T. )
#805 = ORIENTED_EDGE( '', *, *, #1076, .T. )
#806 = ORIENTED_EDGE( '', *, *, #959, .F. )
#807 = ORIENTED_EDGE( '', *, *, #1062, .F. )
#808 = CARTESIAN_POINT( '', ( 21.5873684210526, 85.1557770070399, 1.00000000000000 ) )
#809 = DIRECTION( '', ( 1.15648231731787E-016, -1.00000000000000, 0.000000000000000 ) )
#810 = DIRECTION( '', ( 0.000000000000000, 0.000000000000000, -1.00000000000000 ) )
#811 = ORIENTED_EDGE( '', *, *, #1034, .T. )
#812 = ORIENTED_EDGE( '', *, *, #1078, .T. )
#813 = ORIENTED_EDGE( '', *, *, #964, .F. )
#814 = ORIENTED_EDGE( '', *, *, #1047, .F. )
#815 = CARTESIAN_POINT( '', ( -38.4126315789474, 85.7006750403611, 1.00000000000000 ) )
#816 = DIRECTION( '', ( -1.00000000000000, 0.000000000000000, 0.000000000000000 ) )
#817 = DIRECTION( '', ( 0.000000000000000, 0.000000000000000, 1.00000000000000 ) )
#818 = ORIENTED_EDGE( '', *, *, #1033, .F. )
#819 = ORIENTED_EDGE( '', *, *, #1079, .F. )
#820 = ORIENTED_EDGE( '', *, *, #965, .F. )
#821 = ORIENTED_EDGE( '', *, *, #1078, .F. )
#822 = CARTESIAN_POINT( '', ( -39.4126315789474, 93.1557770070399, 1.00000000000000 ) )
#823 = DIRECTION( '', ( 0.000000000000000, 0.000000000000000, -1.00000000000000 ) )
#824 = DIRECTION( '', ( -1.00000000000000, 0.000000000000000, 0.000000000000000 ) )
#825 = ORIENTED_EDGE( '', *, *, #966, .T. )
#826 = ORIENTED_EDGE( '', *, *, #1079, .T. )
#827 = ORIENTED_EDGE( '', *, *, #1032, .F. )
#828 = ORIENTED_EDGE( '', *, *, #1001, .F. )
#829 = CARTESIAN_POINT( '', ( -68.4126315789474, 94.1557770070399, 1.00000000000000 ) )
#830 = DIRECTION( '', ( 1.54673883685890E-048, 1.00000000000000, 1.33745135026891E-032 ) )
#831 = DIRECTION( '', ( 1.00000000000000, 0.000000000000000, -1.15648231731787E-016 ) )
#832 = ORIENTED_EDGE( '', *, *, #951, .F. )
#833 = ORIENTED_EDGE( '', *, *, #1075, .T. )
#834 = ORIENTED_EDGE( '', *, *, #1058, .T. )
#835 = ORIENTED_EDGE( '', *, *, #1061, .T. )
#836 = CARTESIAN_POINT( '', ( 21.5873684210526, 85.1557770070399, 1.00000000000000 ) )
#837 = DIRECTION( '', ( 1.15648231731787E-016, -1.00000000000000, 0.000000000000000 ) )
#838 = DIRECTION( '', ( 0.000000000000000, 0.000000000000000, -1.00000000000000 ) )
#839 = ORIENTED_EDGE( '', *, *, #975, .F. )
#840 = ORIENTED_EDGE( '', *, *, #978, .F. )
#841 = ORIENTED_EDGE( '', *, *, #1049, .F. )
#842 = ORIENTED_EDGE( '', *, *, #917, .F. )
#843 = CARTESIAN_POINT( '', ( 42.5443862627252, 22.4057770070404, -1.00000000000000 ) )
#844 = DIRECTION( '', ( 0.000000000000000, 0.000000000000000, 1.00000000000000 ) )
#845 = DIRECTION( '', ( 1.00000000000000, 0.000000000000000, 0.000000000000000 ) )
#846 = ORIENTED_EDGE( '', *, *, #922, .F. )
#847 = ORIENTED_EDGE( '', *, *, #1080, .T. )
#848 = ORIENTED_EDGE( '', *, *, #980, .T. )
#849 = ORIENTED_EDGE( '', *, *, #985, .T. )
#850 = CARTESIAN_POINT( '', ( -79.4177471747059, 105.905777007040, -1.00000000000000 ) )
#851 = DIRECTION( '', ( -1.00000000000000, 0.000000000000000, 0.000000000000000 ) )
#852 = DIRECTION( '', ( 0.000000000000000, 0.000000000000000, 1.00000000000000 ) )
#853 = ORIENTED_EDGE( '', *, *, #1074, .F. )
#854 = ORIENTED_EDGE( '', *, *, #1017, .F. )
#855 = ORIENTED_EDGE( '', *, *, #1081, .F. )
#856 = ORIENTED_EDGE( '', *, *, #927, .T. )
#857 = CARTESIAN_POINT( '', ( -68.4126315789474, 40.1557770070402, 1.00000000000000 ) )
#858 = DIRECTION( '', ( 0.000000000000000, 1.00000000000000, 0.000000000000000 ) )
#859 = DIRECTION( '', ( 1.00000000000000, 0.000000000000000, 0.000000000000000 ) )
#860 = ORIENTED_EDGE( '', *, *, #934, .F. )
#861 = ORIENTED_EDGE( '', *, *, #1069, .F. )
#862 = ORIENTED_EDGE( '', *, *, #1010, .T. )
#863 = ORIENTED_EDGE( '', *, *, #1007, .T. )
#864 = CARTESIAN_POINT( '', ( 21.5873684210526, 49.4057770070401, 1.00000000000000 ) )
#865 = DIRECTION( '', ( 0.000000000000000, 0.000000000000000, -1.00000000000000 ) )
#866 = DIRECTION( '', ( -1.00000000000000, 0.000000000000000, 0.000000000000000 ) )
#867 = ORIENTED_EDGE( '', *, *, #982, .F. )
#868 = ORIENTED_EDGE( '', *, *, #1082, .F. )
#869 = ORIENTED_EDGE( '', *, *, #920, .F. )
#870 = ORIENTED_EDGE( '', *, *, #1083, .F. )
#871 = CARTESIAN_POINT( '', ( -92.0376286116175, 105.655777007040, 183.483648776842 ) )
#872 = DIRECTION( '', ( 0.000000000000000, 1.00000000000000, 0.000000000000000 ) )
#873 = DIRECTION( '', ( 0.000000000000000, 0.000000000000000, 1.00000000000000 ) )
#874 = ORIENTED_EDGE( '', *, *, #1012, .T. )
#875 = ORIENTED_EDGE( '', *, *, #1068, .T. )
#876 = ORIENTED_EDGE( '', *, *, #932, .T. )
#877 = ORIENTED_EDGE( '', *, *, #1066, .T. )
#878 = CARTESIAN_POINT( '', ( -68.4126315789474, 58.4057770070400, 1.00000000000000 ) )
#879 = DIRECTION( '', ( 0.000000000000000, 0.000000000000000, -1.00000000000000 ) )
#880 = DIRECTION( '', ( -1.00000000000000, 0.000000000000000, 0.000000000000000 ) )
#881 = ORIENTED_EDGE( '', *, *, #1016, .T. )
#882 = ORIENTED_EDGE( '', *, *, #1063, .T. )
#883 = ORIENTED_EDGE( '', *, *, #928, .T. )
#884 = ORIENTED_EDGE( '', *, *, #1081, .T. )
#885 = CARTESIAN_POINT( '', ( -68.4126315789474, 40.4057770070402, 1.00000000000000 ) )
#886 = DIRECTION( '', ( 0.000000000000000, 0.000000000000000, -1.00000000000000 ) )
#887 = DIRECTION( '', ( -1.00000000000000, 0.000000000000000, 0.000000000000000 ) )
#888 = ORIENTED_EDGE( '', *, *, #1020, .F. )
#889 = ORIENTED_EDGE( '', *, *, #1042, .T. )
#890 = ORIENTED_EDGE( '', *, *, #924, .T. )
#891 = ORIENTED_EDGE( '', *, *, #1036, .F. )
#892 = CARTESIAN_POINT( '', ( -38.4126315789474, 31.6557770070404, 1.00000000000000 ) )
#893 = DIRECTION( '', ( 2.31296463463574E-016, -1.00000000000000, 0.000000000000000 ) )
#894 = DIRECTION( '', ( 0.000000000000000, 0.000000000000000, -1.00000000000000 ) )
#895 = ORIENTED_EDGE( '', *, *, #921, .F. )
#896 = ORIENTED_EDGE( '', *, *, #1082, .T. )
#897 = ORIENTED_EDGE( '', *, *, #981, .F. )
#898 = ORIENTED_EDGE( '', *, *, #1080, .F. )
#899 = CARTESIAN_POINT( '', ( -76.9177471747059, 103.405777007040, -1.00000000000000 ) )
#900 = DIRECTION( '', ( 0.000000000000000, 0.000000000000000, 1.00000000000000 ) )
#901 = DIRECTION( '', ( 1.00000000000000, 0.000000000000000, 0.000000000000000 ) )
#902 = ORIENTED_EDGE( '', *, *, #991, .T. )
#903 = ORIENTED_EDGE( '', *, *, #1077, .T. )
#904 = ORIENTED_EDGE( '', *, *, #943, .T. )
#905 = ORIENTED_EDGE( '', *, *, #1070, .T. )
#906 = CARTESIAN_POINT( '', ( -68.4126315789474, 49.4057770070401, 1.00000000000000 ) )
#907 = DIRECTION( '', ( 0.000000000000000, 0.000000000000000, -1.00000000000000 ) )
#908 = DIRECTION( '', ( -1.00000000000000, 0.000000000000000, 0.000000000000000 ) )
#909 = ORIENTED_EDGE( '', *, *, #983, .F. )
#910 = ORIENTED_EDGE( '', *, *, #1083, .T. )
#911 = ORIENTED_EDGE( '', *, *, #919, .F. )
#912 = ORIENTED_EDGE( '', *, *, #1048, .F. )
#913 = CARTESIAN_POINT( '', ( 42.5443862627252, 103.405777007040, -1.00000000000000 ) )
#914 = DIRECTION( '', ( 0.000000000000000, 0.000000000000000, 1.00000000000000 ) )
#915 = DIRECTION( '', ( 1.00000000000000, 0.000000000000000, 0.000000000000000 ) )
#916 = EDGE_CURVE( '', #1084, #1085, #1086, .T. )
#917 = EDGE_CURVE( '', #1084, #1087, #1088, .T. )
#918 = EDGE_CURVE( '', #1087, #1089, #1090, .T. )
#919 = EDGE_CURVE( '', #1089, #1091, #1092, .T. )
#920 = EDGE_CURVE( '', #1091, #1093, #1094, .T. )
#921 = EDGE_CURVE( '', #1093, #1095, #1096, .T. )
#922 = EDGE_CURVE( '', #1095, #1097, #1098, .T. )
#923 = EDGE_CURVE( '', #1097, #1085, #1099, .T. )
#924 = EDGE_CURVE( '', #1100, #1101, #1102, .T. )
#925 = EDGE_CURVE( '', #1100, #1103, #1104, .T. )
#926 = EDGE_CURVE( '', #1105, #1103, #1106, .T. )
#927 = EDGE_CURVE( '', #1107, #1105, #1108, .T. )
#928 = EDGE_CURVE( '', #1109, #1107, #1110, .T. )
#929 = EDGE_CURVE( '', #1111, #1109, #1112, .T. )
#930 = EDGE_CURVE( '', #1111, #1113, #1114, .T. )
#931 = EDGE_CURVE( '', #1115, #1113, #1116, .T. )
#932 = EDGE_CURVE( '', #1117, #1115, #1118, .T. )
#933 = EDGE_CURVE( '', #1119, #1117, #1120, .T. )
#934 = EDGE_CURVE( '', #1119, #1121, #1122, .T. )
#935 = EDGE_CURVE( '', #1123, #1121, #1124, .T. )
#936 = EDGE_CURVE( '', #1125, #1123, #1126, .T. )
#937 = EDGE_CURVE( '', #1125, #1127, #1128, .T. )
#938 = EDGE_CURVE( '', #1129, #1127, #1130, .T. )
#939 = EDGE_CURVE( '', #1101, #1129, #1131, .T. )
#940 = EDGE_CURVE( '', #1132, #1133, #1134, .T. )
#941 = EDGE_CURVE( '', #1133, #1135, #1136, .T. )
#942 = EDGE_CURVE( '', #1137, #1135, #1138, .T. )
#943 = EDGE_CURVE( '', #1139, #1137, #1140, .T. )
#944 = EDGE_CURVE( '', #1141, #1139, #1142, .T. )
#945 = EDGE_CURVE( '', #1141, #1143, #1144, .T. )
#946 = EDGE_CURVE( '', #1143, #1145, #1146, .T. )
#947 = EDGE_CURVE( '', #1145, #1132, #1147, .T. )
#948 = EDGE_CURVE( '', #1148, #1149, #1150, .T. )
#949 = EDGE_CURVE( '', #1148, #1151, #1152, .T. )
#950 = EDGE_CURVE( '', #1153, #1151, #1154, .T. )
#951 = EDGE_CURVE( '', #1153, #1155, #1156, .T. )
#952 = EDGE_CURVE( '', #1157, #1155, #1158, .T. )
#953 = EDGE_CURVE( '', #1157, #1159, #1160, .T. )
#954 = EDGE_CURVE( '', #1161, #1159, #1162, .T. )
#955 = EDGE_CURVE( '', #1163, #1161, #1164, .T. )
#956 = EDGE_CURVE( '', #1165, #1163, #1166, .T. )
#957 = EDGE_CURVE( '', #1167, #1165, #1168, .T. )
#958 = EDGE_CURVE( '', #1169, #1167, #1170, .T. )
#959 = EDGE_CURVE( '', #1169, #1171, #1172, .T. )
#960 = EDGE_CURVE( '', #1173, #1171, #1174, .T. )
#961 = EDGE_CURVE( '', #1173, #1175, #1176, .T. )
#962 = EDGE_CURVE( '', #1177, #1175, #1178, .T. )
#963 = EDGE_CURVE( '', #1149, #1177, #1179, .T. )
#964 = EDGE_CURVE( '', #1180, #1181, #1182, .T. )
#965 = EDGE_CURVE( '', #1181, #1183, #1184, .T. )
#966 = EDGE_CURVE( '', #1185, #1183, #1186, .T. )
#967 = EDGE_CURVE( '', #1187, #1185, #1188, .T. )
#968 = EDGE_CURVE( '', #1189, #1187, #1190, .T. )
#969 = EDGE_CURVE( '', #1189, #1191, #1192, .T. )
#970 = EDGE_CURVE( '', #1191, #1193, #1194, .T. )
#971 = EDGE_CURVE( '', #1193, #1180, #1195, .T. )
#972 = EDGE_CURVE( '', #1196, #1197, #1198, .T. )
#973 = EDGE_CURVE( '', #1135, #1196, #1199, .T. )
#974 = EDGE_CURVE( '', #1197, #1133, #1200, .T. )
#975 = EDGE_CURVE( '', #1201, #1084, #1202, .F. )
#976 = EDGE_CURVE( '', #1085, #1203, #1204, .T. )
#977 = EDGE_CURVE( '', #1203, #1201, #1205, .T. )
#978 = EDGE_CURVE( '', #1206, #1201, #1207, .T. )
#979 = EDGE_CURVE( '', #1203, #1208, #1209, .T. )
#980 = EDGE_CURVE( '', #1210, #1208, #1211, .T. )
#981 = EDGE_CURVE( '', #1210, #1212, #1213, .T. )
#982 = EDGE_CURVE( '', #1212, #1214, #1215, .T. )
#983 = EDGE_CURVE( '', #1214, #1216, #1217, .T. )
#984 = EDGE_CURVE( '', #1206, #1216, #1218, .T. )
#985 = EDGE_CURVE( '', #1208, #1097, #1219, .T. )
#986 = EDGE_CURVE( '', #1220, #1197, #1221, .T. )
#987 = EDGE_CURVE( '', #1220, #1132, #1222, .T. )
#988 = EDGE_CURVE( '', #1223, #1224, #1225, .T. )
#989 = EDGE_CURVE( '', #1223, #1226, #1227, .T. )
#990 = EDGE_CURVE( '', #1226, #1228, #1229, .T. )
#991 = EDGE_CURVE( '', #1230, #1228, #1231, .T. )
#992 = EDGE_CURVE( '', #1230, #1196, #1232, .T. )
#993 = EDGE_CURVE( '', #1224, #1220, #1233, .T. )
#994 = EDGE_CURVE( '', #1224, #1145, #1234, .T. )
#995 = EDGE_CURVE( '', #1235, #1236, #1237, .T. )
#996 = EDGE_CURVE( '', #1235, #1189, #1238, .T. )
#997 = EDGE_CURVE( '', #1236, #1187, #1239, .T. )
#998 = EDGE_CURVE( '', #1240, #1235, #1241, .T. )
#999 = EDGE_CURVE( '', #1191, #1240, #1242, .T. )
#1000 = EDGE_CURVE( '', #1243, #1236, #1244, .T. )
#1001 = EDGE_CURVE( '', #1185, #1243, #1245, .T. )
#1002 = EDGE_CURVE( '', #1246, #1247, #1248, .T. )
#1003 = EDGE_CURVE( '', #1246, #1125, #1249, .T. )
#1004 = EDGE_CURVE( '', #1123, #1247, #1250, .T. )
#1005 = EDGE_CURVE( '', #1251, #1246, #1252, .T. )
#1006 = EDGE_CURVE( '', #1127, #1251, #1253, .T. )
#1007 = EDGE_CURVE( '', #1254, #1121, #1255, .T. )
#1008 = EDGE_CURVE( '', #1247, #1254, #1256, .T. )
#1009 = EDGE_CURVE( '', #1257, #1251, #1258, .T. )
#1010 = EDGE_CURVE( '', #1259, #1254, #1260, .T. )
#1011 = EDGE_CURVE( '', #1259, #1261, #1262, .T. )
#1012 = EDGE_CURVE( '', #1263, #1261, #1264, .T. )
#1013 = EDGE_CURVE( '', #1263, #1265, #1266, .T. )
#1014 = EDGE_CURVE( '', #1267, #1265, #1268, .T. )
#1015 = EDGE_CURVE( '', #1267, #1269, #1270, .T. )
#1016 = EDGE_CURVE( '', #1271, #1269, #1272, .T. )
#1017 = EDGE_CURVE( '', #1271, #1273, #1274, .T. )
#1018 = EDGE_CURVE( '', #1273, #1275, #1276, .T. )
#1019 = EDGE_CURVE( '', #1275, #1277, #1278, .T. )
#1020 = EDGE_CURVE( '', #1277, #1279, #1280, .T. )
#1021 = EDGE_CURVE( '', #1257, #1279, #1281, .T. )
#1022 = EDGE_CURVE( '', #1282, #1165, #1283, .T. )
#1023 = EDGE_CURVE( '', #1284, #1282, #1285, .T. )
#1024 = EDGE_CURVE( '', #1284, #1167, #1286, .T. )
#1025 = EDGE_CURVE( '', #1157, #1287, #1288, .T. )
#1026 = EDGE_CURVE( '', #1287, #1289, #1290, .T. )
#1027 = EDGE_CURVE( '', #1289, #1159, #1291, .T. )
#1028 = EDGE_CURVE( '', #1163, #1292, #1293, .T. )
#1029 = EDGE_CURVE( '', #1294, #1161, #1295, .T. )
#1030 = EDGE_CURVE( '', #1292, #1294, #1296, .T. )
#1031 = EDGE_CURVE( '', #1240, #1297, #1298, .T. )
#1032 = EDGE_CURVE( '', #1243, #1299, #1300, .T. )
#1033 = EDGE_CURVE( '', #1299, #1301, #1302, .T. )
#1034 = EDGE_CURVE( '', #1303, #1301, #1304, .T. )
#1035 = EDGE_CURVE( '', #1297, #1303, #1305, .T. )
#1036 = EDGE_CURVE( '', #1279, #1101, #1306, .T. )
#1037 = EDGE_CURVE( '', #1129, #1257, #1307, .T. )
#1038 = EDGE_CURVE( '', #1308, #1309, #1310, .T. )
#1039 = EDGE_CURVE( '', #1309, #1149, #1311, .T. )
#1040 = EDGE_CURVE( '', #1177, #1308, #1312, .T. )
#1041 = EDGE_CURVE( '', #1103, #1275, #1313, .T. )
#1042 = EDGE_CURVE( '', #1277, #1100, #1314, .T. )
#1043 = EDGE_CURVE( '', #1315, #1316, #1317, .T. )
#1044 = EDGE_CURVE( '', #1151, #1315, #1318, .T. )
#1045 = EDGE_CURVE( '', #1316, #1148, #1319, .T. )
#1046 = EDGE_CURVE( '', #1297, #1193, #1320, .T. )
#1047 = EDGE_CURVE( '', #1303, #1180, #1321, .T. )
#1048 = EDGE_CURVE( '', #1216, #1089, #1322, .T. )
#1049 = EDGE_CURVE( '', #1087, #1206, #1323, .T. )
#1050 = EDGE_CURVE( '', #1308, #1324, #1325, .T. )
#1051 = EDGE_CURVE( '', #1324, #1326, #1327, .T. )
#1052 = EDGE_CURVE( '', #1326, #1328, #1329, .T. )
#1053 = EDGE_CURVE( '', #1330, #1328, #1331, .T. )
#1054 = EDGE_CURVE( '', #1330, #1284, #1332, .T. )
#1055 = EDGE_CURVE( '', #1292, #1282, #1333, .T. )
#1056 = EDGE_CURVE( '', #1294, #1289, #1334, .T. )
#1057 = EDGE_CURVE( '', #1335, #1287, #1336, .T. )
#1058 = EDGE_CURVE( '', #1337, #1335, #1338, .T. )
#1059 = EDGE_CURVE( '', #1337, #1315, #1339, .T. )
#1060 = EDGE_CURVE( '', #1316, #1309, #1340, .T. )
#1061 = EDGE_CURVE( '', #1335, #1155, #1341, .T. )
#1062 = EDGE_CURVE( '', #1330, #1169, #1342, .T. )
#1063 = EDGE_CURVE( '', #1269, #1109, #1343, .T. )
#1064 = EDGE_CURVE( '', #1267, #1111, #1344, .T. )
#1065 = EDGE_CURVE( '', #1175, #1324, #1345, .T. )
#1066 = EDGE_CURVE( '', #1115, #1263, #1346, .T. )
#1067 = EDGE_CURVE( '', #1265, #1113, #1347, .T. )
#1068 = EDGE_CURVE( '', #1261, #1117, #1348, .T. )
#1069 = EDGE_CURVE( '', #1259, #1119, #1349, .T. )
#1070 = EDGE_CURVE( '', #1137, #1230, #1350, .T. )
#1071 = EDGE_CURVE( '', #1143, #1223, #1351, .T. )
#1072 = EDGE_CURVE( '', #1226, #1141, #1352, .T. )
#1073 = EDGE_CURVE( '', #1326, #1173, #1353, .T. )
#1074 = EDGE_CURVE( '', #1273, #1105, #1354, .T. )
#1075 = EDGE_CURVE( '', #1153, #1337, #1355, .T. )
#1076 = EDGE_CURVE( '', #1328, #1171, #1356, .T. )
#1077 = EDGE_CURVE( '', #1228, #1139, #1357, .T. )
#1078 = EDGE_CURVE( '', #1301, #1181, #1358, .T. )
#1079 = EDGE_CURVE( '', #1183, #1299, #1359, .T. )
#1080 = EDGE_CURVE( '', #1095, #1210, #1360, .T. )
#1081 = EDGE_CURVE( '', #1107, #1271, #1361, .T. )
#1082 = EDGE_CURVE( '', #1093, #1212, #1362, .T. )
#1083 = EDGE_CURVE( '', #1214, #1091, #1363, .F. )
#1084 = VERTEX_POINT( '', #1364 )
#1085 = VERTEX_POINT( '', #1365 )
#1086 = LINE( '', #1366, #1367 )
#1087 = VERTEX_POINT( '', #1368 )
#1088 = CIRCLE( '', #1369, 2.50000000000000 )
#1089 = VERTEX_POINT( '', #1370 )
#1090 = LINE( '', #1371, #1372 )
#1091 = VERTEX_POINT( '', #1373 )
#1092 = CIRCLE( '', #1374, 2.50000000000000 )
#1093 = VERTEX_POINT( '', #1375 )
#1094 = LINE( '', #1376, #1377 )
#1095 = VERTEX_POINT( '', #1378 )
#1096 = CIRCLE( '', #1379, 2.50000000000000 )
#1097 = VERTEX_POINT( '', #1380 )
#1098 = LINE( '', #1381, #1382 )
#1099 = CIRCLE( '', #1383, 2.50000000000000 )
#1100 = VERTEX_POINT( '', #1384 )
#1101 = VERTEX_POINT( '', #1385 )
#1102 = LINE( '', #1386, #1387 )
#1103 = VERTEX_POINT( '', #1388 )
#1104 = CIRCLE( '', #1389, 1.00000000000000 )
#1105 = VERTEX_POINT( '', #1390 )
#1106 = LINE( '', #1391, #1392 )
#1107 = VERTEX_POINT( '', #1393 )
#1108 = LINE( '', #1394, #1395 )
#1109 = VERTEX_POINT( '', #1396 )
#1110 = CIRCLE( '', #1397, 0.500000000000000 )
#1111 = VERTEX_POINT( '', #1398 )
#1112 = LINE( '', #1399, #1400 )
#1113 = VERTEX_POINT( '', #1401 )
#1114 = CIRCLE( '', #1402, 8.74999999999985 )
#1115 = VERTEX_POINT( '', #1403 )
#1116 = LINE( '', #1404, #1405 )
#1117 = VERTEX_POINT( '', #1406 )
#1118 = CIRCLE( '', #1407, 0.500000000000000 )
#1119 = VERTEX_POINT( '', #1408 )
#1120 = LINE( '', #1409, #1410 )
#1121 = VERTEX_POINT( '', #1411 )
#1122 = CIRCLE( '', #1412, 9.24999999999986 )
#1123 = VERTEX_POINT( '', #1413 )
#1124 = LINE( '', #1414, #1415 )
#1125 = VERTEX_POINT( '', #1416 )
#1126 = LINE( '', #1417, #1418 )
#1127 = VERTEX_POINT( '', #1419 )
#1128 = CIRCLE( '', #1420, 2.00000000000000 )
#1129 = VERTEX_POINT( '', #1421 )
#1130 = LINE( '', #1422, #1423 )
#1131 = CIRCLE( '', #1424, 0.500000000000000 )
#1132 = VERTEX_POINT( '', #1425 )
#1133 = VERTEX_POINT( '', #1426 )
#1134 = LINE( '', #1427, #1428 )
#1135 = VERTEX_POINT( '', #1429 )
#1136 = CIRCLE( '', #1430, 1.00000000000000 )
#1137 = VERTEX_POINT( '', #1431 )
#1138 = LINE( '', #1432, #1433 )
#1139 = VERTEX_POINT( '', #1434 )
#1140 = CIRCLE( '', #1435, 0.500000000000000 )
#1141 = VERTEX_POINT( '', #1436 )
#1142 = LINE( '', #1437, #1438 )
#1143 = VERTEX_POINT( '', #1439 )
#1144 = CIRCLE( '', #1440, 2.00000000000000 )
#1145 = VERTEX_POINT( '', #1441 )
#1146 = LINE( '', #1442, #1443 )
#1147 = LINE( '', #1444, #1445 )
#1148 = VERTEX_POINT( '', #1446 )
#1149 = VERTEX_POINT( '', #1447 )
#1150 = LINE( '', #1448, #1449 )
#1151 = VERTEX_POINT( '', #1450 )
#1152 = CIRCLE( '', #1451, 1.00000000000000 )
#1153 = VERTEX_POINT( '', #1452 )
#1154 = LINE( '', #1453, #1454 )
#1155 = VERTEX_POINT( '', #1455 )
#1156 = LINE( '', #1456, #1457 )
#1157 = VERTEX_POINT( '', #1458 )
#1158 = CIRCLE( '', #1459, 0.500000000000000 )
#1159 = VERTEX_POINT( '', #1460 )
#1160 = LINE( '', #1461, #1462 )
#1161 = VERTEX_POINT( '', #1463 )
#1162 = CIRCLE( '', #1464, 9.24999999999992 )
#1163 = VERTEX_POINT( '', #1465 )
#1164 = LINE( '', #1466, #1467 )
#1165 = VERTEX_POINT( '', #1468 )
#1166 = CIRCLE( '', #1469, 0.500000000000000 )
#1167 = VERTEX_POINT( '', #1470 )
#1168 = LINE( '', #1471, #1472 )
#1169 = VERTEX_POINT( '', #1473 )
#1170 = CIRCLE( '', #1474, 8.74999999999993 )
#1171 = VERTEX_POINT( '', #1475 )
#1172 = LINE( '', #1476, #1477 )
#1173 = VERTEX_POINT( '', #1478 )
#1174 = LINE( '', #1479, #1480 )
#1175 = VERTEX_POINT( '', #1481 )
#1176 = CIRCLE( '', #1482, 2.00000000000000 )
#1177 = VERTEX_POINT( '', #1483 )
#1178 = LINE( '', #1484, #1485 )
#1179 = CIRCLE( '', #1486, 0.500000000000000 )
#1180 = VERTEX_POINT( '', #1487 )
#1181 = VERTEX_POINT( '', #1488 )
#1182 = LINE( '', #1489, #1490 )
#1183 = VERTEX_POINT( '', #1491 )
#1184 = CIRCLE( '', #1492, 1.00000000000000 )
#1185 = VERTEX_POINT( '', #1493 )
#1186 = LINE( '', #1494, #1495 )
#1187 = VERTEX_POINT( '', #1496 )
#1188 = CIRCLE( '', #1497, 0.500000000000000 )
#1189 = VERTEX_POINT( '', #1498 )
#1190 = LINE( '', #1499, #1500 )
#1191 = VERTEX_POINT( '', #1501 )
#1192 = CIRCLE( '', #1502, 2.00000000000000 )
#1193 = VERTEX_POINT( '', #1503 )
#1194 = LINE( '', #1504, #1505 )
#1195 = LINE( '', #1506, #1507 )
#1196 = VERTEX_POINT( '', #1508 )
#1197 = VERTEX_POINT( '', #1509 )
#1198 = CIRCLE( '', #1510, 1.00000000000000 )
#1199 = LINE( '', #1511, #1512 )
#1200 = LINE( '', #1513, #1514 )
#1201 = VERTEX_POINT( '', #1515 )
#1202 = LINE( '', #1516, #1517 )
#1203 = VERTEX_POINT( '', #1518 )
#1204 = LINE( '', #1519, #1520 )
#1205 = LINE( '', #1521, #1522 )
#1206 = VERTEX_POINT( '', #1523 )
#1207 = CIRCLE( '', #1524, 2.50000000000000 )
#1208 = VERTEX_POINT( '', #1525 )
#1209 = CIRCLE( '', #1526, 2.50000000000000 )
#1210 = VERTEX_POINT( '', #1527 )
#1211 = LINE( '', #1528, #1529 )
#1212 = VERTEX_POINT( '', #1530 )
#1213 = CIRCLE( '', #1531, 2.50000000000000 )
#1214 = VERTEX_POINT( '', #1532 )
#1215 = LINE( '', #1533, #1534 )
#1216 = VERTEX_POINT( '', #1535 )
#1217 = CIRCLE( '', #1536, 2.50000000000000 )
#1218 = LINE( '', #1537, #1538 )
#1219 = LINE( '', #1539, #1540 )
#1220 = VERTEX_POINT( '', #1541 )
#1221 = LINE( '', #1542, #1543 )
#1222 = LINE( '', #1544, #1545 )
#1223 = VERTEX_POINT( '', #1546 )
#1224 = VERTEX_POINT( '', #1547 )
#1225 = LINE( '', #1548, #1549 )
#1226 = VERTEX_POINT( '', #1550 )
#1227 = CIRCLE( '', #1551, 2.00000000000000 )
#1228 = VERTEX_POINT( '', #1552 )
#1229 = LINE( '', #1553, #1554 )
#1230 = VERTEX_POINT( '', #1555 )
#1231 = CIRCLE( '', #1556, 0.500000000000000 )
#1232 = LINE( '', #1557, #1558 )
#1233 = LINE( '', #1559, #1560 )
#1234 = LINE( '', #1561, #1562 )
#1235 = VERTEX_POINT( '', #1563 )
#1236 = VERTEX_POINT( '', #1564 )
#1237 = LINE( '', #1565, #1566 )
#1238 = LINE( '', #1567, #1568 )
#1239 = LINE( '', #1569, #1570 )
#1240 = VERTEX_POINT( '', #1571 )
#1241 = CIRCLE( '', #1572, 2.00000000000000 )
#1242 = LINE( '', #1573, #1574 )
#1243 = VERTEX_POINT( '', #1575 )
#1244 = CIRCLE( '', #1576, 0.500000000000000 )
#1245 = LINE( '', #1577, #1578 )
#1246 = VERTEX_POINT( '', #1579 )
#1247 = VERTEX_POINT( '', #1580 )
#1248 = LINE( '', #1581, #1582 )
#1249 = LINE( '', #1583, #1584 )
#1250 = LINE( '', #1585, #1586 )
#1251 = VERTEX_POINT( '', #1587 )
#1252 = CIRCLE( '', #1588, 2.00000000000000 )
#1253 = LINE( '', #1589, #1590 )
#1254 = VERTEX_POINT( '', #1591 )
#1255 = LINE( '', #1592, #1593 )
#1256 = LINE( '', #1594, #1595 )
#1257 = VERTEX_POINT( '', #1596 )
#1258 = LINE( '', #1597, #1598 )
#1259 = VERTEX_POINT( '', #1599 )
#1260 = CIRCLE( '', #1600, 9.24999999999986 )
#1261 = VERTEX_POINT( '', #1601 )
#1262 = LINE( '', #1602, #1603 )
#1263 = VERTEX_POINT( '', #1604 )
#1264 = CIRCLE( '', #1605, 0.500000000000000 )
#1265 = VERTEX_POINT( '', #1606 )
#1266 = LINE( '', #1607, #1608 )
#1267 = VERTEX_POINT( '', #1609 )
#1268 = CIRCLE( '', #1610, 8.74999999999985 )
#1269 = VERTEX_POINT( '', #1611 )
#1270 = LINE( '', #1612, #1613 )
#1271 = VERTEX_POINT( '', #1614 )
#1272 = CIRCLE( '', #1615, 0.500000000000000 )
#1273 = VERTEX_POINT( '', #1616 )
#1274 = LINE( '', #1617, #1618 )
#1275 = VERTEX_POINT( '', #1619 )
#1276 = LINE( '', #1620, #1621 )
#1277 = VERTEX_POINT( '', #1622 )
#1278 = CIRCLE( '', #1623, 1.00000000000000 )
#1279 = VERTEX_POINT( '', #1624 )
#1280 = LINE( '', #1625, #1626 )
#1281 = CIRCLE( '', #1627, 0.500000000000000 )
#1282 = VERTEX_POINT( '', #1628 )
#1283 = LINE( '', #1629, #1630 )
#1284 = VERTEX_POINT( '', #1631 )
#1285 = LINE( '', #1632, #1633 )
#1286 = LINE( '', #1634, #1635 )
#1287 = VERTEX_POINT( '', #1636 )
#1288 = LINE( '', #1637, #1638 )
#1289 = VERTEX_POINT( '', #1639 )
#1290 = LINE( '', #1640, #1641 )
#1291 = LINE( '', #1642, #1643 )
#1292 = VERTEX_POINT( '', #1644 )
#1293 = LINE( '', #1645, #1646 )
#1294 = VERTEX_POINT( '', #1647 )
#1295 = LINE( '', #1648, #1649 )
#1296 = LINE( '', #1650, #1651 )
#1297 = VERTEX_POINT( '', #1652 )
#1298 = LINE( '', #1653, #1654 )
#1299 = VERTEX_POINT( '', #1655 )
#1300 = LINE( '', #1656, #1657 )
#1301 = VERTEX_POINT( '', #1658 )
#1302 = CIRCLE( '', #1659, 1.00000000000000 )
#1303 = VERTEX_POINT( '', #1660 )
#1304 = LINE( '', #1661, #1662 )
#1305 = LINE( '', #1663, #1664 )
#1306 = LINE( '', #1665, #1666 )
#1307 = LINE( '', #1667, #1668 )
#1308 = VERTEX_POINT( '', #1669 )
#1309 = VERTEX_POINT( '', #1670 )
#1310 = CIRCLE( '', #1671, 0.500000000000000 )
#1311 = LINE( '', #1672, #1673 )
#1312 = LINE( '', #1674, #1675 )
#1313 = LINE( '', #1676, #1677 )
#1314 = LINE( '', #1678, #1679 )
#1315 = VERTEX_POINT( '', #1680 )
#1316 = VERTEX_POINT( '', #1681 )
#1317 = CIRCLE( '', #1682, 1.00000000000000 )
#1318 = LINE( '', #1683, #1684 )
#1319 = LINE( '', #1685, #1686 )
#1320 = LINE( '', #1687, #1688 )
#1321 = LINE( '', #1689, #1690 )
#1322 = LINE( '', #1691, #1692 )
#1323 = LINE( '', #1693, #1694 )
#1324 = VERTEX_POINT( '', #1695 )
#1325 = LINE( '', #1696, #1697 )
#1326 = VERTEX_POINT( '', #1698 )
#1327 = CIRCLE( '', #1699, 2.00000000000000 )
#1328 = VERTEX_POINT( '', #1700 )
#1329 = LINE( '', #1701, #1702 )
#1330 = VERTEX_POINT( '', #1703 )
#1331 = LINE( '', #1704, #1705 )
#1332 = CIRCLE( '', #1706, 8.74999999999993 )
#1333 = CIRCLE( '', #1707, 0.500000000000000 )
#1334 = CIRCLE( '', #1708, 9.24999999999992 )
#1335 = VERTEX_POINT( '', #1709 )
#1336 = CIRCLE( '', #1710, 0.500000000000000 )
#1337 = VERTEX_POINT( '', #1711 )
#1338 = LINE( '', #1712, #1713 )
#1339 = LINE( '', #1714, #1715 )
#1340 = LINE( '', #1716, #1717 )
#1341 = LINE( '', #1718, #1719 )
#1342 = LINE( '', #1720, #1721 )
#1343 = LINE( '', #1722, #1723 )
#1344 = LINE( '', #1724, #1725 )
#1345 = LINE( '', #1726, #1727 )
#1346 = LINE( '', #1728, #1729 )
#1347 = LINE( '', #1730, #1731 )
#1348 = LINE( '', #1732, #1733 )
#1349 = LINE( '', #1734, #1735 )
#1350 = LINE( '', #1736, #1737 )
#1351 = LINE( '', #1738, #1739 )
#1352 = LINE( '', #1740, #1741 )
#1353 = LINE( '', #1742, #1743 )
#1354 = LINE( '', #1744, #1745 )
#1355 = LINE( '', #1746, #1747 )
#1356 = LINE( '', #1748, #1749 )
#1357 = LINE( '', #1750, #1751 )
#1358 = LINE( '', #1752, #1753 )
#1359 = LINE( '', #1754, #1755 )
#1360 = LINE( '', #1756, #1757 )
#1361 = LINE( '', #1758, #1759 )
#1362 = LINE( '', #1760, #1761 )
#1363 = LINE( '', #1762, #1763 )
#1364 = CARTESIAN_POINT( '', ( 43.6341109986104, 20.1557770070404, 0.000000000000000 ) )
#1365 = CARTESIAN_POINT( '', ( -78.0074719105911, 20.1557770070404, 0.000000000000000 ) )
#1366 = CARTESIAN_POINT( '', ( -79.4177471747059, 20.1557770070404, 0.000000000000000 ) )
#1367 = VECTOR( '', #1764, 1000.00000000000 )
#1368 = CARTESIAN_POINT( '', ( 45.0443862627252, 22.4057770070404, 0.000000000000000 ) )
#1369 = AXIS2_PLACEMENT_3D( '', #1765, #1766, #1767 )
#1370 = CARTESIAN_POINT( '', ( 45.0443862627252, 103.405777007040, 0.000000000000000 ) )
#1371 = CARTESIAN_POINT( '', ( 45.0443862627252, 19.9057770070404, 0.000000000000000 ) )
#1372 = VECTOR( '', #1768, 1000.00000000000 )
#1373 = CARTESIAN_POINT( '', ( 43.6341109986104, 105.655777007040, 0.000000000000000 ) )
#1374 = AXIS2_PLACEMENT_3D( '', #1769, #1770, #1771 )
#1375 = CARTESIAN_POINT( '', ( -78.0074719105911, 105.655777007040, 0.000000000000000 ) )
#1376 = CARTESIAN_POINT( '', ( -79.4177471747059, 105.655777007040, 0.000000000000000 ) )
#1377 = VECTOR( '', #1772, 1000.00000000000 )
#1378 = CARTESIAN_POINT( '', ( -79.4177471747059, 103.405777007040, 0.000000000000000 ) )
#1379 = AXIS2_PLACEMENT_3D( '', #1773, #1774, #1775 )
#1380 = CARTESIAN_POINT( '', ( -79.4177471747059, 22.4057770070404, 0.000000000000000 ) )
#1381 = CARTESIAN_POINT( '', ( -79.4177471747059, 105.905777007040, 0.000000000000000 ) )
#1382 = VECTOR( '', #1776, 1000.00000000000 )
#1383 = AXIS2_PLACEMENT_3D( '', #1777, #1778, #1779 )
#1384 = CARTESIAN_POINT( '', ( -39.4126315789474, 31.6557770070404, 0.000000000000000 ) )
#1385 = CARTESIAN_POINT( '', ( -67.9796188770552, 31.6557770070404, 0.000000000000000 ) )
#1386 = CARTESIAN_POINT( '', ( -38.4126315789474, 31.6557770070404, 0.000000000000000 ) )
#1387 = VECTOR( '', #1780, 1000.00000000000 )
#1388 = CARTESIAN_POINT( '', ( -38.4126315789474, 32.6557770070404, 0.000000000000000 ) )
#1389 = AXIS2_PLACEMENT_3D( '', #1781, #1782, #1783 )
#1390 = CARTESIAN_POINT( '', ( -38.4126315789474, 40.1557770070402, 0.000000000000000 ) )
#1391 = CARTESIAN_POINT( '', ( -38.4126315789474, 40.2043351978870, 0.000000000000000 ) )
#1392 = VECTOR( '', #1784, 1000.00000000000 )
#1393 = CARTESIAN_POINT( '', ( -67.9796188770552, 40.1557770070402, 0.000000000000000 ) )
#1394 = CARTESIAN_POINT( '', ( -68.4126315789474, 40.1557770070402, 0.000000000000000 ) )
#1395 = VECTOR( '', #1785, 1000.00000000000 )
#1396 = CARTESIAN_POINT( '', ( -67.9796188770552, 40.6557770070402, 0.000000000000000 ) )
#1397 = AXIS2_PLACEMENT_3D( '', #1786, #1787, #1788 )
#1398 = CARTESIAN_POINT( '', ( 21.5873684210526, 40.6557770070403, 0.000000000000000 ) )
#1399 = CARTESIAN_POINT( '', ( 21.5873684210526, 40.6557770070403, 0.000000000000000 ) )
#1400 = VECTOR( '', #1789, 1000.00000000000 )
#1401 = CARTESIAN_POINT( '', ( 21.5873684210526, 58.1557770070400, 0.000000000000000 ) )
#1402 = AXIS2_PLACEMENT_3D( '', #1790, #1791, #1792 )
#1403 = CARTESIAN_POINT( '', ( -67.9796188770552, 58.1557770070400, 0.000000000000000 ) )
#1404 = CARTESIAN_POINT( '', ( -68.4126315789474, 58.1557770070400, 0.000000000000000 ) )
#1405 = VECTOR( '', #1793, 1000.00000000000 )
#1406 = CARTESIAN_POINT( '', ( -67.9796188770552, 58.6557770070400, 0.000000000000000 ) )
#1407 = AXIS2_PLACEMENT_3D( '', #1794, #1795, #1796 )
#1408 = CARTESIAN_POINT( '', ( 21.5873684210526, 58.6557770070400, 0.000000000000000 ) )
#1409 = CARTESIAN_POINT( '', ( 21.5873684210526, 58.6557770070400, 0.000000000000000 ) )
#1410 = VECTOR( '', #1797, 1000.00000000000 )
#1411 = CARTESIAN_POINT( '', ( 21.5873684210526, 40.1557770070402, 0.000000000000000 ) )
#1412 = AXIS2_PLACEMENT_3D( '', #1798, #1799, #1800 )
#1413 = CARTESIAN_POINT( '', ( -37.9126315789474, 40.1557770070402, 0.000000000000000 ) )
#1414 = CARTESIAN_POINT( '', ( -68.4126315789474, 40.1557770070402, 0.000000000000000 ) )
#1415 = VECTOR( '', #1801, 1000.00000000000 )
#1416 = CARTESIAN_POINT( '', ( -37.9126315789474, 33.1557770070404, 0.000000000000000 ) )
#1417 = CARTESIAN_POINT( '', ( -37.9126315789474, 31.1557770070404, 0.000000000000000 ) )
#1418 = VECTOR( '', #1802, 1000.00000000000 )
#1419 = CARTESIAN_POINT( '', ( -39.9126315789474, 31.1557770070404, 0.000000000000000 ) )
#1420 = AXIS2_PLACEMENT_3D( '', #1803, #1804, #1805 )
#1421 = CARTESIAN_POINT( '', ( -67.9796188770552, 31.1557770070404, 0.000000000000000 ) )
#1422 = CARTESIAN_POINT( '', ( -68.4126315789474, 31.1557770070404, 0.000000000000000 ) )
#1423 = VECTOR( '', #1806, 1000.00000000000 )
#1424 = AXIS2_PLACEMENT_3D( '', #1807, #1808, #1809 )
#1425 = CARTESIAN_POINT( '', ( -8.41263157894742, 40.7184364275384, 0.000000000000000 ) )
#1426 = CARTESIAN_POINT( '', ( -8.41263157894742, 48.1557770070401, 0.000000000000000 ) )
#1427 = CARTESIAN_POINT( '', ( -8.41263157894742, 40.7184364275384, 0.000000000000000 ) )
#1428 = VECTOR( '', #1810, 1000.00000000000 )
#1429 = CARTESIAN_POINT( '', ( -9.41263157894742, 49.1557770070401, 0.000000000000000 ) )
#1430 = AXIS2_PLACEMENT_3D( '', #1811, #1812, #1813 )
#1431 = CARTESIAN_POINT( '', ( -67.9796188770552, 49.1557770070401, 0.000000000000000 ) )
#1432 = CARTESIAN_POINT( '', ( -68.4126315789474, 49.1557770070401, 0.000000000000000 ) )
#1433 = VECTOR( '', #1814, 1000.00000000000 )
#1434 = CARTESIAN_POINT( '', ( -67.9796188770552, 49.6557770070401, 0.000000000000000 ) )
#1435 = AXIS2_PLACEMENT_3D( '', #1815, #1816, #1817 )
#1436 = CARTESIAN_POINT( '', ( -9.91263157894742, 49.6557770070401, 0.000000000000000 ) )
#1437 = CARTESIAN_POINT( '', ( -8.41263157894742, 49.6557770070401, 0.000000000000000 ) )
#1438 = VECTOR( '', #1818, 1000.00000000000 )
#1439 = CARTESIAN_POINT( '', ( -7.91263157894742, 47.6557770070401, 0.000000000000000 ) )
#1440 = AXIS2_PLACEMENT_3D( '', #1819, #1820, #1821 )
#1441 = CARTESIAN_POINT( '', ( -7.91263157894742, 40.7184364275384, 0.000000000000000 ) )
#1442 = CARTESIAN_POINT( '', ( -7.91263157894742, 49.6557770070401, 0.000000000000000 ) )
#1443 = VECTOR( '', #1822, 1000.00000000000 )
#1444 = CARTESIAN_POINT( '', ( -7.91263157894742, 40.7184364275384, 0.000000000000000 ) )
#1445 = VECTOR( '', #1823, 1000.00000000000 )
#1446 = CARTESIAN_POINT( '', ( -9.41263157894738, 76.6557770070398, 0.000000000000000 ) )
#1447 = CARTESIAN_POINT( '', ( -67.9796188770552, 76.6557770070398, 0.000000000000000 ) )
#1448 = CARTESIAN_POINT( '', ( -8.41263157894738, 76.6557770070398, 0.000000000000000 ) )
#1449 = VECTOR( '', #1824, 1000.00000000000 )
#1450 = CARTESIAN_POINT( '', ( -8.41263157894738, 77.6557770070398, 0.000000000000000 ) )
#1451 = AXIS2_PLACEMENT_3D( '', #1825, #1826, #1827 )
#1452 = CARTESIAN_POINT( '', ( -8.41263157894738, 85.1557770070399, 0.000000000000000 ) )
#1453 = CARTESIAN_POINT( '', ( -8.41263157894738, 85.2702992175271, 0.000000000000000 ) )
#1454 = VECTOR( '', #1828, 1000.00000000000 )
#1455 = CARTESIAN_POINT( '', ( -67.9796188770552, 85.1557770070399, 0.000000000000000 ) )
#1456 = CARTESIAN_POINT( '', ( 21.5873684210526, 85.1557770070399, 0.000000000000000 ) )
#1457 = VECTOR( '', #1829, 1000.00000000000 )
#1458 = CARTESIAN_POINT( '', ( -67.9796188770552, 85.6557770070399, 0.000000000000000 ) )
#1459 = AXIS2_PLACEMENT_3D( '', #1830, #1831, #1832 )
#1460 = CARTESIAN_POINT( '', ( 21.5873684210525, 85.6557770070398, 0.000000000000000 ) )
#1461 = CARTESIAN_POINT( '', ( -68.4126315789474, 85.6557770070399, 0.000000000000000 ) )
#1462 = VECTOR( '', #1833, 1000.00000000000 )
#1463 = CARTESIAN_POINT( '', ( 21.5873684210526, 67.1557770070399, 0.000000000000000 ) )
#1464 = AXIS2_PLACEMENT_3D( '', #1834, #1835, #1836 )
#1465 = CARTESIAN_POINT( '', ( -67.9796188770552, 67.1557770070399, 0.000000000000000 ) )
#1466 = CARTESIAN_POINT( '', ( -68.4126315789474, 67.1557770070399, 0.000000000000000 ) )
#1467 = VECTOR( '', #1837, 1000.00000000000 )
#1468 = CARTESIAN_POINT( '', ( -67.9796188770552, 67.6557770070399, 0.000000000000000 ) )
#1469 = AXIS2_PLACEMENT_3D( '', #1838, #1839, #1840 )
#1470 = CARTESIAN_POINT( '', ( 21.5873684210526, 67.6557770070399, 0.000000000000000 ) )
#1471 = CARTESIAN_POINT( '', ( 21.5873684210526, 67.6557770070399, 0.000000000000000 ) )
#1472 = VECTOR( '', #1841, 1000.00000000000 )
#1473 = CARTESIAN_POINT( '', ( 21.5873684210526, 85.1557770070398, 0.000000000000000 ) )
#1474 = AXIS2_PLACEMENT_3D( '', #1842, #1843, #1844 )
#1475 = CARTESIAN_POINT( '', ( -7.91263157894738, 85.1557770070399, 0.000000000000000 ) )
#1476 = CARTESIAN_POINT( '', ( 21.5873684210526, 85.1557770070399, 0.000000000000000 ) )
#1477 = VECTOR( '', #1845, 1000.00000000000 )
#1478 = CARTESIAN_POINT( '', ( -7.91263157894738, 78.1557770070398, 0.000000000000000 ) )
#1479 = CARTESIAN_POINT( '', ( -7.91263157894738, 76.1557770070398, 0.000000000000000 ) )
#1480 = VECTOR( '', #1846, 1000.00000000000 )
#1481 = CARTESIAN_POINT( '', ( -9.91263157894738, 76.1557770070398, 0.000000000000000 ) )
#1482 = AXIS2_PLACEMENT_3D( '', #1847, #1848, #1849 )
#1483 = CARTESIAN_POINT( '', ( -67.9796188770552, 76.1557770070398, 0.000000000000000 ) )
#1484 = CARTESIAN_POINT( '', ( -68.4126315789474, 76.1557770070398, 0.000000000000000 ) )
#1485 = VECTOR( '', #1850, 1000.00000000000 )
#1486 = AXIS2_PLACEMENT_3D( '', #1851, #1852, #1853 )
#1487 = CARTESIAN_POINT( '', ( -38.4126315789474, 85.7006750403611, 0.000000000000000 ) )
#1488 = CARTESIAN_POINT( '', ( -38.4126315789474, 93.1557770070399, 0.000000000000000 ) )
#1489 = CARTESIAN_POINT( '', ( -38.4126315789474, 85.7006750403611, 0.000000000000000 ) )
#1490 = VECTOR( '', #1854, 1000.00000000000 )
#1491 = CARTESIAN_POINT( '', ( -39.4126315789474, 94.1557770070399, 0.000000000000000 ) )
#1492 = AXIS2_PLACEMENT_3D( '', #1855, #1856, #1857 )
#1493 = CARTESIAN_POINT( '', ( -67.9796188770552, 94.1557770070399, 0.000000000000000 ) )
#1494 = CARTESIAN_POINT( '', ( -68.4126315789474, 94.1557770070399, 0.000000000000000 ) )
#1495 = VECTOR( '', #1858, 1000.00000000000 )
#1496 = CARTESIAN_POINT( '', ( -67.9796188770552, 94.6557770070399, 0.000000000000000 ) )
#1497 = AXIS2_PLACEMENT_3D( '', #1859, #1860, #1861 )
#1498 = CARTESIAN_POINT( '', ( -39.9126315789474, 94.6557770070399, 0.000000000000000 ) )
#1499 = CARTESIAN_POINT( '', ( -38.4126315789474, 94.6557770070399, 0.000000000000000 ) )
#1500 = VECTOR( '', #1862, 1000.00000000000 )
#1501 = CARTESIAN_POINT( '', ( -37.9126315789474, 92.6557770070399, 0.000000000000000 ) )
#1502 = AXIS2_PLACEMENT_3D( '', #1863, #1864, #1865 )
#1503 = CARTESIAN_POINT( '', ( -37.9126315789474, 85.7006750403611, 0.000000000000000 ) )
#1504 = CARTESIAN_POINT( '', ( -37.9126315789474, 94.6557770070399, 0.000000000000000 ) )
#1505 = VECTOR( '', #1866, 1000.00000000000 )
#1506 = CARTESIAN_POINT( '', ( -37.9126315789474, 85.7006750403611, 0.000000000000000 ) )
#1507 = VECTOR( '', #1867, 1000.00000000000 )
#1508 = CARTESIAN_POINT( '', ( -9.41263157894742, 49.1557770070401, 1.00000000000000 ) )
#1509 = CARTESIAN_POINT( '', ( -8.41263157894742, 48.1557770070401, 1.00000000000000 ) )
#1510 = AXIS2_PLACEMENT_3D( '', #1868, #1869, #1870 )
#1511 = CARTESIAN_POINT( '', ( -9.41263157894742, 49.1557770070401, 1.00000000000000 ) )
#1512 = VECTOR( '', #1871, 1000.00000000000 )
#1513 = CARTESIAN_POINT( '', ( -8.41263157894742, 48.1557770070401, 1.00000000000000 ) )
#1514 = VECTOR( '', #1872, 1000.00000000000 )
#1515 = CARTESIAN_POINT( '', ( 43.6341109986104, 20.1557770070404, -1.00000000000000 ) )
#1516 = CARTESIAN_POINT( '', ( 43.6341109986104, 20.1557770070404, -1.00000000000000 ) )
#1517 = VECTOR( '', #1873, 1000.00000000000 )
#1518 = CARTESIAN_POINT( '', ( -78.0074719105911, 20.1557770070404, -1.00000000000000 ) )
#1519 = CARTESIAN_POINT( '', ( -78.0074719105911, 20.1557770070404, -1.00000000000000 ) )
#1520 = VECTOR( '', #1874, 1000.00000000000 )
#1521 = CARTESIAN_POINT( '', ( -89.2589391209214, 20.1557770070404, -1.00000000000000 ) )
#1522 = VECTOR( '', #1875, 1000.00000000000 )
#1523 = CARTESIAN_POINT( '', ( 45.0443862627252, 22.4057770070404, -1.00000000000000 ) )
#1524 = AXIS2_PLACEMENT_3D( '', #1876, #1877, #1878 )
#1525 = CARTESIAN_POINT( '', ( -79.4177471747059, 22.4057770070404, -1.00000000000000 ) )
#1526 = AXIS2_PLACEMENT_3D( '', #1879, #1880, #1881 )
#1527 = CARTESIAN_POINT( '', ( -79.4177471747059, 103.405777007040, -1.00000000000000 ) )
#1528 = CARTESIAN_POINT( '', ( -79.4177471747059, 105.905777007040, -1.00000000000000 ) )
#1529 = VECTOR( '', #1882, 1000.00000000000 )
#1530 = CARTESIAN_POINT( '', ( -78.0074719105911, 105.655777007040, -1.00000000000000 ) )
#1531 = AXIS2_PLACEMENT_3D( '', #1883, #1884, #1885 )
#1532 = CARTESIAN_POINT( '', ( 43.6341109986104, 105.655777007040, -1.00000000000000 ) )
#1533 = CARTESIAN_POINT( '', ( -92.0376286116175, 105.655777007040, -1.00000000000000 ) )
#1534 = VECTOR( '', #1886, 1000.00000000000 )
#1535 = CARTESIAN_POINT( '', ( 45.0443862627252, 103.405777007040, -1.00000000000000 ) )
#1536 = AXIS2_PLACEMENT_3D( '', #1887, #1888, #1889 )
#1537 = CARTESIAN_POINT( '', ( 45.0443862627252, 19.9057770070404, -1.00000000000000 ) )
#1538 = VECTOR( '', #1890, 1000.00000000000 )
#1539 = CARTESIAN_POINT( '', ( -79.4177471747059, 22.4057770070404, -1.00000000000000 ) )
#1540 = VECTOR( '', #1891, 1000.00000000000 )
#1541 = CARTESIAN_POINT( '', ( -8.41263157894742, 40.7184364275384, 1.00000000000000 ) )
#1542 = CARTESIAN_POINT( '', ( -8.41263157894742, 40.7184364275384, 1.00000000000000 ) )
#1543 = VECTOR( '', #1892, 1000.00000000000 )
#1544 = CARTESIAN_POINT( '', ( -8.41263157894742, 40.7184364275384, 1.00000000000000 ) )
#1545 = VECTOR( '', #1893, 1000.00000000000 )
#1546 = CARTESIAN_POINT( '', ( -7.91263157894742, 47.6557770070401, 1.00000000000000 ) )
#1547 = CARTESIAN_POINT( '', ( -7.91263157894742, 40.7184364275384, 1.00000000000000 ) )
#1548 = CARTESIAN_POINT( '', ( -7.91263157894742, 49.6557770070401, 1.00000000000000 ) )
#1549 = VECTOR( '', #1894, 1000.00000000000 )
#1550 = CARTESIAN_POINT( '', ( -9.91263157894742, 49.6557770070401, 1.00000000000000 ) )
#1551 = AXIS2_PLACEMENT_3D( '', #1895, #1896, #1897 )
#1552 = CARTESIAN_POINT( '', ( -67.9796188770552, 49.6557770070401, 1.00000000000000 ) )
#1553 = CARTESIAN_POINT( '', ( -8.41263157894742, 49.6557770070401, 1.00000000000000 ) )
#1554 = VECTOR( '', #1898, 1000.00000000000 )
#1555 = CARTESIAN_POINT( '', ( -67.9796188770552, 49.1557770070401, 1.00000000000000 ) )
#1556 = AXIS2_PLACEMENT_3D( '', #1899, #1900, #1901 )
#1557 = CARTESIAN_POINT( '', ( -68.4126315789474, 49.1557770070401, 1.00000000000000 ) )
#1558 = VECTOR( '', #1902, 1000.00000000000 )
#1559 = CARTESIAN_POINT( '', ( -7.91263157894742, 40.7184364275384, 1.00000000000000 ) )
#1560 = VECTOR( '', #1903, 1000.00000000000 )
#1561 = CARTESIAN_POINT( '', ( -7.91263157894742, 40.7184364275384, 1.00000000000000 ) )
#1562 = VECTOR( '', #1904, 1000.00000000000 )
#1563 = CARTESIAN_POINT( '', ( -39.9126315789474, 94.6557770070399, 1.00000000000000 ) )
#1564 = CARTESIAN_POINT( '', ( -67.9796188770552, 94.6557770070399, 1.00000000000000 ) )
#1565 = CARTESIAN_POINT( '', ( -38.4126315789474, 94.6557770070399, 1.00000000000000 ) )
#1566 = VECTOR( '', #1905, 1000.00000000000 )
#1567 = CARTESIAN_POINT( '', ( -39.9126315789474, 94.6557770070399, 0.000000000000000 ) )
#1568 = VECTOR( '', #1906, 1000.00000000000 )
#1569 = CARTESIAN_POINT( '', ( -67.9796188770552, 94.6557770070399, 1.00000000000000 ) )
#1570 = VECTOR( '', #1907, 1000.00000000000 )
#1571 = CARTESIAN_POINT( '', ( -37.9126315789474, 92.6557770070399, 1.00000000000000 ) )
#1572 = AXIS2_PLACEMENT_3D( '', #1908, #1909, #1910 )
#1573 = CARTESIAN_POINT( '', ( -37.9126315789474, 92.6557770070399, 1.00000000000000 ) )
#1574 = VECTOR( '', #1911, 1000.00000000000 )
#1575 = CARTESIAN_POINT( '', ( -67.9796188770552, 94.1557770070399, 1.00000000000000 ) )
#1576 = AXIS2_PLACEMENT_3D( '', #1912, #1913, #1914 )
#1577 = CARTESIAN_POINT( '', ( -67.9796188770552, 94.1557770070399, 1.00000000000000 ) )
#1578 = VECTOR( '', #1915, 1000.00000000000 )
#1579 = CARTESIAN_POINT( '', ( -37.9126315789474, 33.1557770070404, 1.00000000000000 ) )
#1580 = CARTESIAN_POINT( '', ( -37.9126315789474, 40.1557770070402, 1.00000000000000 ) )
#1581 = CARTESIAN_POINT( '', ( -37.9126315789474, 31.1557770070404, 1.00000000000000 ) )
#1582 = VECTOR( '', #1916, 1000.00000000000 )
#1583 = CARTESIAN_POINT( '', ( -37.9126315789474, 33.1557770070404, 1.00000000000000 ) )
#1584 = VECTOR( '', #1917, 1000.00000000000 )
#1585 = CARTESIAN_POINT( '', ( -37.9126315789474, 40.1557770070402, 1.00000000000000 ) )
#1586 = VECTOR( '', #1918, 1000.00000000000 )
#1587 = CARTESIAN_POINT( '', ( -39.9126315789474, 31.1557770070404, 1.00000000000000 ) )
#1588 = AXIS2_PLACEMENT_3D( '', #1919, #1920, #1921 )
#1589 = CARTESIAN_POINT( '', ( -39.9126315789474, 31.1557770070404, 1.00000000000000 ) )
#1590 = VECTOR( '', #1922, 1000.00000000000 )
#1591 = CARTESIAN_POINT( '', ( 21.5873684210526, 40.1557770070402, 1.00000000000000 ) )
#1592 = CARTESIAN_POINT( '', ( 21.5873684210526, 40.1557770070402, 1.00000000000000 ) )
#1593 = VECTOR( '', #1923, 1000.00000000000 )
#1594 = CARTESIAN_POINT( '', ( -68.4126315789474, 40.1557770070402, 1.00000000000000 ) )
#1595 = VECTOR( '', #1924, 1000.00000000000 )
#1596 = CARTESIAN_POINT( '', ( -67.9796188770552, 31.1557770070404, 1.00000000000000 ) )
#1597 = CARTESIAN_POINT( '', ( -68.4126315789474, 31.1557770070404, 1.00000000000000 ) )
#1598 = VECTOR( '', #1925, 1000.00000000000 )
#1599 = CARTESIAN_POINT( '', ( 21.5873684210526, 58.6557770070400, 1.00000000000000 ) )
#1600 = AXIS2_PLACEMENT_3D( '', #1926, #1927, #1928 )
#1601 = CARTESIAN_POINT( '', ( -67.9796188770552, 58.6557770070400, 1.00000000000000 ) )
#1602 = CARTESIAN_POINT( '', ( 21.5873684210526, 58.6557770070400, 1.00000000000000 ) )
#1603 = VECTOR( '', #1929, 1000.00000000000 )
#1604 = CARTESIAN_POINT( '', ( -67.9796188770552, 58.1557770070400, 1.00000000000000 ) )
#1605 = AXIS2_PLACEMENT_3D( '', #1930, #1931, #1932 )
#1606 = CARTESIAN_POINT( '', ( 21.5873684210526, 58.1557770070400, 1.00000000000000 ) )
#1607 = CARTESIAN_POINT( '', ( -68.4126315789474, 58.1557770070400, 1.00000000000000 ) )
#1608 = VECTOR( '', #1933, 1000.00000000000 )
#1609 = CARTESIAN_POINT( '', ( 21.5873684210526, 40.6557770070403, 1.00000000000000 ) )
#1610 = AXIS2_PLACEMENT_3D( '', #1934, #1935, #1936 )
#1611 = CARTESIAN_POINT( '', ( -67.9796188770552, 40.6557770070402, 1.00000000000000 ) )
#1612 = CARTESIAN_POINT( '', ( 21.5873684210526, 40.6557770070403, 1.00000000000000 ) )
#1613 = VECTOR( '', #1937, 1000.00000000000 )
#1614 = CARTESIAN_POINT( '', ( -67.9796188770552, 40.1557770070402, 1.00000000000000 ) )
#1615 = AXIS2_PLACEMENT_3D( '', #1938, #1939, #1940 )
#1616 = CARTESIAN_POINT( '', ( -38.4126315789474, 40.1557770070402, 1.00000000000000 ) )
#1617 = CARTESIAN_POINT( '', ( -68.4126315789474, 40.1557770070402, 1.00000000000000 ) )
#1618 = VECTOR( '', #1941, 1000.00000000000 )
#1619 = CARTESIAN_POINT( '', ( -38.4126315789474, 32.6557770070404, 1.00000000000000 ) )
#1620 = CARTESIAN_POINT( '', ( -38.4126315789474, 40.2043351978870, 1.00000000000000 ) )
#1621 = VECTOR( '', #1942, 1000.00000000000 )
#1622 = CARTESIAN_POINT( '', ( -39.4126315789474, 31.6557770070404, 1.00000000000000 ) )
#1623 = AXIS2_PLACEMENT_3D( '', #1943, #1944, #1945 )
#1624 = CARTESIAN_POINT( '', ( -67.9796188770552, 31.6557770070404, 1.00000000000000 ) )
#1625 = CARTESIAN_POINT( '', ( -38.4126315789474, 31.6557770070404, 1.00000000000000 ) )
#1626 = VECTOR( '', #1946, 1000.00000000000 )
#1627 = AXIS2_PLACEMENT_3D( '', #1947, #1948, #1949 )
#1628 = CARTESIAN_POINT( '', ( -67.9796188770552, 67.6557770070399, 1.00000000000000 ) )
#1629 = CARTESIAN_POINT( '', ( -67.9796188770552, 67.6557770070399, 1.00000000000000 ) )
#1630 = VECTOR( '', #1950, 1000.00000000000 )
#1631 = CARTESIAN_POINT( '', ( 21.5873684210526, 67.6557770070399, 1.00000000000000 ) )
#1632 = CARTESIAN_POINT( '', ( 21.5873684210526, 67.6557770070399, 1.00000000000000 ) )
#1633 = VECTOR( '', #1951, 1000.00000000000 )
#1634 = CARTESIAN_POINT( '', ( 21.5873684210526, 67.6557770070399, 1.00000000000000 ) )
#1635 = VECTOR( '', #1952, 1000.00000000000 )
#1636 = CARTESIAN_POINT( '', ( -67.9796188770552, 85.6557770070399, 1.00000000000000 ) )
#1637 = CARTESIAN_POINT( '', ( -67.9796188770552, 85.6557770070399, 1.00000000000000 ) )
#1638 = VECTOR( '', #1953, 1000.00000000000 )
#1639 = CARTESIAN_POINT( '', ( 21.5873684210525, 85.6557770070398, 1.00000000000000 ) )
#1640 = CARTESIAN_POINT( '', ( -68.4126315789474, 85.6557770070399, 1.00000000000000 ) )
#1641 = VECTOR( '', #1954, 1000.00000000000 )
#1642 = CARTESIAN_POINT( '', ( 21.5873684210525, 85.6557770070399, 1.00000000000000 ) )
#1643 = VECTOR( '', #1955, 1000.00000000000 )
#1644 = CARTESIAN_POINT( '', ( -67.9796188770552, 67.1557770070399, 1.00000000000000 ) )
#1645 = CARTESIAN_POINT( '', ( -67.9796188770552, 67.1557770070399, 1.00000000000000 ) )
#1646 = VECTOR( '', #1956, 1000.00000000000 )
#1647 = CARTESIAN_POINT( '', ( 21.5873684210526, 67.1557770070399, 1.00000000000000 ) )
#1648 = CARTESIAN_POINT( '', ( 21.5873684210526, 67.1557770070399, 1.00000000000000 ) )
#1649 = VECTOR( '', #1957, 1000.00000000000 )
#1650 = CARTESIAN_POINT( '', ( -68.4126315789474, 67.1557770070399, 1.00000000000000 ) )
#1651 = VECTOR( '', #1958, 1000.00000000000 )
#1652 = CARTESIAN_POINT( '', ( -37.9126315789474, 85.7006750403611, 1.00000000000000 ) )
#1653 = CARTESIAN_POINT( '', ( -37.9126315789474, 94.6557770070399, 1.00000000000000 ) )
#1654 = VECTOR( '', #1959, 1000.00000000000 )
#1655 = CARTESIAN_POINT( '', ( -39.4126315789474, 94.1557770070399, 1.00000000000000 ) )
#1656 = CARTESIAN_POINT( '', ( -68.4126315789474, 94.1557770070399, 1.00000000000000 ) )
#1657 = VECTOR( '', #1960, 1000.00000000000 )
#1658 = CARTESIAN_POINT( '', ( -38.4126315789474, 93.1557770070399, 1.00000000000000 ) )
#1659 = AXIS2_PLACEMENT_3D( '', #1961, #1962, #1963 )
#1660 = CARTESIAN_POINT( '', ( -38.4126315789474, 85.7006750403611, 1.00000000000000 ) )
#1661 = CARTESIAN_POINT( '', ( -38.4126315789474, 85.7006750403611, 1.00000000000000 ) )
#1662 = VECTOR( '', #1964, 1000.00000000000 )
#1663 = CARTESIAN_POINT( '', ( -37.9126315789474, 85.7006750403611, 1.00000000000000 ) )
#1664 = VECTOR( '', #1965, 1000.00000000000 )
#1665 = CARTESIAN_POINT( '', ( -67.9796188770552, 31.6557770070404, 1.00000000000000 ) )
#1666 = VECTOR( '', #1966, 1000.00000000000 )
#1667 = CARTESIAN_POINT( '', ( -67.9796188770552, 31.1557770070404, 1.00000000000000 ) )
#1668 = VECTOR( '', #1967, 1000.00000000000 )
#1669 = CARTESIAN_POINT( '', ( -67.9796188770552, 76.1557770070398, 1.00000000000000 ) )
#1670 = CARTESIAN_POINT( '', ( -67.9796188770552, 76.6557770070398, 1.00000000000000 ) )
#1671 = AXIS2_PLACEMENT_3D( '', #1968, #1969, #1970 )
#1672 = CARTESIAN_POINT( '', ( -67.9796188770552, 76.6557770070398, 1.00000000000000 ) )
#1673 = VECTOR( '', #1971, 1000.00000000000 )
#1674 = CARTESIAN_POINT( '', ( -67.9796188770552, 76.1557770070398, 1.00000000000000 ) )
#1675 = VECTOR( '', #1972, 1000.00000000000 )
#1676 = CARTESIAN_POINT( '', ( -38.4126315789474, 32.6557770070404, 1.00000000000000 ) )
#1677 = VECTOR( '', #1973, 1000.00000000000 )
#1678 = CARTESIAN_POINT( '', ( -39.4126315789474, 31.6557770070404, 0.000000000000000 ) )
#1679 = VECTOR( '', #1974, 1000.00000000000 )
#1680 = CARTESIAN_POINT( '', ( -8.41263157894738, 77.6557770070398, 1.00000000000000 ) )
#1681 = CARTESIAN_POINT( '', ( -9.41263157894738, 76.6557770070398, 1.00000000000000 ) )
#1682 = AXIS2_PLACEMENT_3D( '', #1975, #1976, #1977 )
#1683 = CARTESIAN_POINT( '', ( -8.41263157894738, 77.6557770070398, 1.00000000000000 ) )
#1684 = VECTOR( '', #1978, 1000.00000000000 )
#1685 = CARTESIAN_POINT( '', ( -9.41263157894738, 76.6557770070398, 0.000000000000000 ) )
#1686 = VECTOR( '', #1979, 1000.00000000000 )
#1687 = CARTESIAN_POINT( '', ( -37.9126315789474, 85.7006750403611, 1.00000000000000 ) )
#1688 = VECTOR( '', #1980, 1000.00000000000 )
#1689 = CARTESIAN_POINT( '', ( -38.4126315789474, 85.7006750403611, 1.00000000000000 ) )
#1690 = VECTOR( '', #1981, 1000.00000000000 )
#1691 = CARTESIAN_POINT( '', ( 45.0443862627252, 103.405777007040, -1.00000000000000 ) )
#1692 = VECTOR( '', #1982, 1000.00000000000 )
#1693 = CARTESIAN_POINT( '', ( 45.0443862627252, 22.4057770070404, -1.00000000000000 ) )
#1694 = VECTOR( '', #1983, 1000.00000000000 )
#1695 = CARTESIAN_POINT( '', ( -9.91263157894738, 76.1557770070398, 1.00000000000000 ) )
#1696 = CARTESIAN_POINT( '', ( -68.4126315789474, 76.1557770070398, 1.00000000000000 ) )
#1697 = VECTOR( '', #1984, 1000.00000000000 )
#1698 = CARTESIAN_POINT( '', ( -7.91263157894738, 78.1557770070398, 1.00000000000000 ) )
#1699 = AXIS2_PLACEMENT_3D( '', #1985, #1986, #1987 )
#1700 = CARTESIAN_POINT( '', ( -7.91263157894738, 85.1557770070399, 1.00000000000000 ) )
#1701 = CARTESIAN_POINT( '', ( -7.91263157894738, 76.1557770070398, 1.00000000000000 ) )
#1702 = VECTOR( '', #1988, 1000.00000000000 )
#1703 = CARTESIAN_POINT( '', ( 21.5873684210526, 85.1557770070398, 1.00000000000000 ) )
#1704 = CARTESIAN_POINT( '', ( 21.5873684210526, 85.1557770070399, 1.00000000000000 ) )
#1705 = VECTOR( '', #1989, 1000.00000000000 )
#1706 = AXIS2_PLACEMENT_3D( '', #1990, #1991, #1992 )
#1707 = AXIS2_PLACEMENT_3D( '', #1993, #1994, #1995 )
#1708 = AXIS2_PLACEMENT_3D( '', #1996, #1997, #1998 )
#1709 = CARTESIAN_POINT( '', ( -67.9796188770552, 85.1557770070399, 1.00000000000000 ) )
#1710 = AXIS2_PLACEMENT_3D( '', #1999, #2000, #2001 )
#1711 = CARTESIAN_POINT( '', ( -8.41263157894738, 85.1557770070399, 1.00000000000000 ) )
#1712 = CARTESIAN_POINT( '', ( 21.5873684210526, 85.1557770070399, 1.00000000000000 ) )
#1713 = VECTOR( '', #2002, 1000.00000000000 )
#1714 = CARTESIAN_POINT( '', ( -8.41263157894738, 85.2702992175271, 1.00000000000000 ) )
#1715 = VECTOR( '', #2003, 1000.00000000000 )
#1716 = CARTESIAN_POINT( '', ( -8.41263157894738, 76.6557770070398, 1.00000000000000 ) )
#1717 = VECTOR( '', #2004, 1000.00000000000 )
#1718 = CARTESIAN_POINT( '', ( -67.9796188770552, 85.1557770070399, 1.00000000000000 ) )
#1719 = VECTOR( '', #2005, 1000.00000000000 )
#1720 = CARTESIAN_POINT( '', ( 21.5873684210526, 85.1557770070399, 1.00000000000000 ) )
#1721 = VECTOR( '', #2006, 1000.00000000000 )
#1722 = CARTESIAN_POINT( '', ( -67.9796188770552, 40.6557770070402, 1.00000000000000 ) )
#1723 = VECTOR( '', #2007, 1000.00000000000 )
#1724 = CARTESIAN_POINT( '', ( 21.5873684210526, 40.6557770070403, 1.00000000000000 ) )
#1725 = VECTOR( '', #2008, 1000.00000000000 )
#1726 = CARTESIAN_POINT( '', ( -9.91263157894738, 76.1557770070398, 1.00000000000000 ) )
#1727 = VECTOR( '', #2009, 1000.00000000000 )
#1728 = CARTESIAN_POINT( '', ( -67.9796188770552, 58.1557770070400, 1.00000000000000 ) )
#1729 = VECTOR( '', #2010, 1000.00000000000 )
#1730 = CARTESIAN_POINT( '', ( 21.5873684210526, 58.1557770070400, 1.00000000000000 ) )
#1731 = VECTOR( '', #2011, 1000.00000000000 )
#1732 = CARTESIAN_POINT( '', ( -67.9796188770552, 58.6557770070400, 1.00000000000000 ) )
#1733 = VECTOR( '', #2012, 1000.00000000000 )
#1734 = CARTESIAN_POINT( '', ( 21.5873684210526, 58.6557770070400, 1.00000000000000 ) )
#1735 = VECTOR( '', #2013, 1000.00000000000 )
#1736 = CARTESIAN_POINT( '', ( -67.9796188770552, 49.1557770070401, 1.00000000000000 ) )
#1737 = VECTOR( '', #2014, 1000.00000000000 )
#1738 = CARTESIAN_POINT( '', ( -7.91263157894742, 47.6557770070401, 1.00000000000000 ) )
#1739 = VECTOR( '', #2015, 1000.00000000000 )
#1740 = CARTESIAN_POINT( '', ( -9.91263157894742, 49.6557770070401, 0.000000000000000 ) )
#1741 = VECTOR( '', #2016, 1000.00000000000 )
#1742 = CARTESIAN_POINT( '', ( -7.91263157894738, 78.1557770070398, 1.00000000000000 ) )
#1743 = VECTOR( '', #2017, 1000.00000000000 )
#1744 = CARTESIAN_POINT( '', ( -38.4126315789474, 40.1557770070402, 1.00000000000000 ) )
#1745 = VECTOR( '', #2018, 1000.00000000000 )
#1746 = CARTESIAN_POINT( '', ( -8.41263157894738, 85.1557770070399, 1.00000000000000 ) )
#1747 = VECTOR( '', #2019, 1000.00000000000 )
#1748 = CARTESIAN_POINT( '', ( -7.91263157894738, 85.1557770070399, 1.00000000000000 ) )
#1749 = VECTOR( '', #2020, 1000.00000000000 )
#1750 = CARTESIAN_POINT( '', ( -67.9796188770552, 49.6557770070401, 1.00000000000000 ) )
#1751 = VECTOR( '', #2021, 1000.00000000000 )
#1752 = CARTESIAN_POINT( '', ( -38.4126315789474, 93.1557770070399, 1.00000000000000 ) )
#1753 = VECTOR( '', #2022, 1000.00000000000 )
#1754 = CARTESIAN_POINT( '', ( -39.4126315789474, 94.1557770070399, 1.00000000000000 ) )
#1755 = VECTOR( '', #2023, 1000.00000000000 )
#1756 = CARTESIAN_POINT( '', ( -79.4177471747059, 103.405777007040, -1.00000000000000 ) )
#1757 = VECTOR( '', #2024, 1000.00000000000 )
#1758 = CARTESIAN_POINT( '', ( -67.9796188770552, 40.1557770070402, 1.00000000000000 ) )
#1759 = VECTOR( '', #2025, 1000.00000000000 )
#1760 = CARTESIAN_POINT( '', ( -78.0074719105911, 105.655777007040, -1.00000000000000 ) )
#1761 = VECTOR( '', #2026, 1000.00000000000 )
#1762 = CARTESIAN_POINT( '', ( 43.6341109986104, 105.655777007040, -1.00000000000000 ) )
#1763 = VECTOR( '', #2027, 1000.00000000000 )
#1764 = DIRECTION( '', ( -1.00000000000000, 0.000000000000000, 0.000000000000000 ) )
#1765 = CARTESIAN_POINT( '', ( 42.5443862627252, 22.4057770070404, 0.000000000000000 ) )
#1766 = DIRECTION( '', ( 0.000000000000000, 0.000000000000000, 1.00000000000000 ) )
#1767 = DIRECTION( '', ( 1.00000000000000, 0.000000000000000, 0.000000000000000 ) )
#1768 = DIRECTION( '', ( 0.000000000000000, 1.00000000000000, 0.000000000000000 ) )
#1769 = CARTESIAN_POINT( '', ( 42.5443862627252, 103.405777007040, 0.000000000000000 ) )
#1770 = DIRECTION( '', ( 0.000000000000000, 0.000000000000000, 1.00000000000000 ) )
#1771 = DIRECTION( '', ( 1.00000000000000, 0.000000000000000, 0.000000000000000 ) )
#1772 = DIRECTION( '', ( -1.00000000000000, 0.000000000000000, 0.000000000000000 ) )
#1773 = CARTESIAN_POINT( '', ( -76.9177471747059, 103.405777007040, 0.000000000000000 ) )
#1774 = DIRECTION( '', ( 0.000000000000000, 0.000000000000000, 1.00000000000000 ) )
#1775 = DIRECTION( '', ( 1.00000000000000, 0.000000000000000, 0.000000000000000 ) )
#1776 = DIRECTION( '', ( 0.000000000000000, -1.00000000000000, 0.000000000000000 ) )
#1777 = CARTESIAN_POINT( '', ( -76.9177471747059, 22.4057770070404, 0.000000000000000 ) )
#1778 = DIRECTION( '', ( 0.000000000000000, 0.000000000000000, 1.00000000000000 ) )
#1779 = DIRECTION( '', ( 1.00000000000000, 0.000000000000000, 0.000000000000000 ) )
#1780 = DIRECTION( '', ( -1.00000000000000, -2.31296463463574E-016, 0.000000000000000 ) )
#1781 = CARTESIAN_POINT( '', ( -39.4126315789474, 32.6557770070404, 0.000000000000000 ) )
#1782 = DIRECTION( '', ( 0.000000000000000, 0.000000000000000, 1.00000000000000 ) )
#1783 = DIRECTION( '', ( 1.00000000000000, 0.000000000000000, 0.000000000000000 ) )
#1784 = DIRECTION( '', ( 0.000000000000000, -1.00000000000000, 0.000000000000000 ) )
#1785 = DIRECTION( '', ( 1.00000000000000, 0.000000000000000, 0.000000000000000 ) )
#1786 = CARTESIAN_POINT( '', ( -68.4126315789474, 40.4057770070402, 0.000000000000000 ) )
#1787 = DIRECTION( '', ( 0.000000000000000, 0.000000000000000, 1.00000000000000 ) )
#1788 = DIRECTION( '', ( 1.00000000000000, 0.000000000000000, 0.000000000000000 ) )
#1789 = DIRECTION( '', ( -1.00000000000000, -7.70988211545248E-017, 0.000000000000000 ) )
#1790 = CARTESIAN_POINT( '', ( 21.5873684210526, 49.4057770070401, 0.000000000000000 ) )
#1791 = DIRECTION( '', ( 0.000000000000000, 0.000000000000000, 1.00000000000000 ) )
#1792 = DIRECTION( '', ( -1.00000000000000, 0.000000000000000, 0.000000000000000 ) )
#1793 = DIRECTION( '', ( 1.00000000000000, 0.000000000000000, 0.000000000000000 ) )
#1794 = CARTESIAN_POINT( '', ( -68.4126315789474, 58.4057770070400, 0.000000000000000 ) )
#1795 = DIRECTION( '', ( 0.000000000000000, 0.000000000000000, 1.00000000000000 ) )
#1796 = DIRECTION( '', ( 1.00000000000000, 0.000000000000000, 0.000000000000000 ) )
#1797 = DIRECTION( '', ( -1.00000000000000, -1.15648231731787E-016, 0.000000000000000 ) )
#1798 = CARTESIAN_POINT( '', ( 21.5873684210526, 49.4057770070401, 0.000000000000000 ) )
#1799 = DIRECTION( '', ( 0.000000000000000, 0.000000000000000, -1.00000000000000 ) )
#1800 = DIRECTION( '', ( -1.00000000000000, 0.000000000000000, 0.000000000000000 ) )
#1801 = DIRECTION( '', ( 1.00000000000000, 0.000000000000000, 0.000000000000000 ) )
#1802 = DIRECTION( '', ( 0.000000000000000, 1.00000000000000, 0.000000000000000 ) )
#1803 = CARTESIAN_POINT( '', ( -39.9126315789474, 33.1557770070404, 0.000000000000000 ) )
#1804 = DIRECTION( '', ( 0.000000000000000, 0.000000000000000, -1.00000000000000 ) )
#1805 = DIRECTION( '', ( 1.00000000000000, 0.000000000000000, 0.000000000000000 ) )
#1806 = DIRECTION( '', ( 1.00000000000000, 0.000000000000000, 0.000000000000000 ) )
#1807 = CARTESIAN_POINT( '', ( -68.4126315789474, 31.4057770070404, 0.000000000000000 ) )
#1808 = DIRECTION( '', ( 0.000000000000000, 0.000000000000000, 1.00000000000000 ) )
#1809 = DIRECTION( '', ( 1.00000000000000, 0.000000000000000, 0.000000000000000 ) )
#1810 = DIRECTION( '', ( 0.000000000000000, 1.00000000000000, 0.000000000000000 ) )
#1811 = CARTESIAN_POINT( '', ( -9.41263157894742, 48.1557770070401, 0.000000000000000 ) )
#1812 = DIRECTION( '', ( 0.000000000000000, 0.000000000000000, 1.00000000000000 ) )
#1813 = DIRECTION( '', ( 1.00000000000000, 0.000000000000000, 0.000000000000000 ) )
#1814 = DIRECTION( '', ( 1.00000000000000, 0.000000000000000, 0.000000000000000 ) )
#1815 = CARTESIAN_POINT( '', ( -68.4126315789474, 49.4057770070401, 0.000000000000000 ) )
#1816 = DIRECTION( '', ( 0.000000000000000, 0.000000000000000, 1.00000000000000 ) )
#1817 = DIRECTION( '', ( 1.00000000000000, 0.000000000000000, 0.000000000000000 ) )
#1818 = DIRECTION( '', ( -1.00000000000000, -1.15648231731787E-016, 0.000000000000000 ) )
#1819 = CARTESIAN_POINT( '', ( -9.91263157894742, 47.6557770070401, 0.000000000000000 ) )
#1820 = DIRECTION( '', ( 0.000000000000000, 0.000000000000000, -1.00000000000000 ) )
#1821 = DIRECTION( '', ( 1.00000000000000, 0.000000000000000, 0.000000000000000 ) )
#1822 = DIRECTION( '', ( 0.000000000000000, -1.00000000000000, 0.000000000000000 ) )
#1823 = DIRECTION( '', ( -1.00000000000000, 0.000000000000000, 0.000000000000000 ) )
#1824 = DIRECTION( '', ( -1.00000000000000, -1.15648231731787E-016, 0.000000000000000 ) )
#1825 = CARTESIAN_POINT( '', ( -9.41263157894738, 77.6557770070398, 0.000000000000000 ) )
#1826 = DIRECTION( '', ( 0.000000000000000, 0.000000000000000, 1.00000000000000 ) )
#1827 = DIRECTION( '', ( 1.00000000000000, 0.000000000000000, 0.000000000000000 ) )
#1828 = DIRECTION( '', ( 0.000000000000000, -1.00000000000000, 0.000000000000000 ) )
#1829 = DIRECTION( '', ( -1.00000000000000, -1.15648231731787E-016, 0.000000000000000 ) )
#1830 = CARTESIAN_POINT( '', ( -68.4126315789474, 85.4057770070399, 0.000000000000000 ) )
#1831 = DIRECTION( '', ( 0.000000000000000, 0.000000000000000, 1.00000000000000 ) )
#1832 = DIRECTION( '', ( 1.00000000000000, 0.000000000000000, 0.000000000000000 ) )
#1833 = DIRECTION( '', ( 1.00000000000000, 0.000000000000000, 0.000000000000000 ) )
#1834 = CARTESIAN_POINT( '', ( 21.5873684210525, 76.4057770070398, 0.000000000000000 ) )
#1835 = DIRECTION( '', ( 0.000000000000000, 0.000000000000000, 1.00000000000000 ) )
#1836 = DIRECTION( '', ( -1.00000000000000, 0.000000000000000, 0.000000000000000 ) )
#1837 = DIRECTION( '', ( 1.00000000000000, 0.000000000000000, 0.000000000000000 ) )
#1838 = CARTESIAN_POINT( '', ( -68.4126315789474, 67.4057770070399, 0.000000000000000 ) )
#1839 = DIRECTION( '', ( 0.000000000000000, 0.000000000000000, 1.00000000000000 ) )
#1840 = DIRECTION( '', ( 1.00000000000000, 0.000000000000000, 0.000000000000000 ) )
#1841 = DIRECTION( '', ( -1.00000000000000, -1.25285584376103E-016, 0.000000000000000 ) )
#1842 = CARTESIAN_POINT( '', ( 21.5873684210525, 76.4057770070398, 0.000000000000000 ) )
#1843 = DIRECTION( '', ( 0.000000000000000, 0.000000000000000, -1.00000000000000 ) )
#1844 = DIRECTION( '', ( -1.00000000000000, 0.000000000000000, 0.000000000000000 ) )
#1845 = DIRECTION( '', ( -1.00000000000000, -1.15648231731787E-016, 0.000000000000000 ) )
#1846 = DIRECTION( '', ( 0.000000000000000, 1.00000000000000, 0.000000000000000 ) )
#1847 = CARTESIAN_POINT( '', ( -9.91263157894738, 78.1557770070398, 0.000000000000000 ) )
#1848 = DIRECTION( '', ( 0.000000000000000, 0.000000000000000, -1.00000000000000 ) )
#1849 = DIRECTION( '', ( 1.00000000000000, 0.000000000000000, 0.000000000000000 ) )
#1850 = DIRECTION( '', ( 1.00000000000000, 0.000000000000000, 0.000000000000000 ) )
#1851 = CARTESIAN_POINT( '', ( -68.4126315789474, 76.4057770070398, 0.000000000000000 ) )
#1852 = DIRECTION( '', ( 0.000000000000000, 0.000000000000000, 1.00000000000000 ) )
#1853 = DIRECTION( '', ( 1.00000000000000, 0.000000000000000, 0.000000000000000 ) )
#1854 = DIRECTION( '', ( 0.000000000000000, 1.00000000000000, 0.000000000000000 ) )
#1855 = CARTESIAN_POINT( '', ( -39.4126315789474, 93.1557770070399, 0.000000000000000 ) )
#1856 = DIRECTION( '', ( 0.000000000000000, 0.000000000000000, 1.00000000000000 ) )
#1857 = DIRECTION( '', ( 1.00000000000000, 0.000000000000000, 0.000000000000000 ) )
#1858 = DIRECTION( '', ( 1.00000000000000, -1.15648231731787E-016, 0.000000000000000 ) )
#1859 = CARTESIAN_POINT( '', ( -68.4126315789474, 94.4057770070399, 0.000000000000000 ) )
#1860 = DIRECTION( '', ( 0.000000000000000, 0.000000000000000, 1.00000000000000 ) )
#1861 = DIRECTION( '', ( 1.00000000000000, 0.000000000000000, 0.000000000000000 ) )
#1862 = DIRECTION( '', ( -1.00000000000000, -2.31296463463574E-016, 0.000000000000000 ) )
#1863 = CARTESIAN_POINT( '', ( -39.9126315789474, 92.6557770070399, 0.000000000000000 ) )
#1864 = DIRECTION( '', ( 0.000000000000000, 0.000000000000000, -1.00000000000000 ) )
#1865 = DIRECTION( '', ( 1.00000000000000, 0.000000000000000, 0.000000000000000 ) )
#1866 = DIRECTION( '', ( 0.000000000000000, -1.00000000000000, 0.000000000000000 ) )
#1867 = DIRECTION( '', ( -1.00000000000000, 0.000000000000000, 0.000000000000000 ) )
#1868 = CARTESIAN_POINT( '', ( -9.41263157894742, 48.1557770070401, 1.00000000000000 ) )
#1869 = DIRECTION( '', ( 0.000000000000000, 0.000000000000000, -1.00000000000000 ) )
#1870 = DIRECTION( '', ( -1.00000000000000, 0.000000000000000, 0.000000000000000 ) )
#1871 = DIRECTION( '', ( 0.000000000000000, 0.000000000000000, 1.00000000000000 ) )
#1872 = DIRECTION( '', ( 0.000000000000000, 0.000000000000000, -1.00000000000000 ) )
#1873 = DIRECTION( '', ( 0.000000000000000, 0.000000000000000, -1.00000000000000 ) )
#1874 = DIRECTION( '', ( 0.000000000000000, 0.000000000000000, -1.00000000000000 ) )
#1875 = DIRECTION( '', ( 1.00000000000000, 0.000000000000000, 0.000000000000000 ) )
#1876 = CARTESIAN_POINT( '', ( 42.5443862627252, 22.4057770070404, -1.00000000000000 ) )
#1877 = DIRECTION( '', ( 0.000000000000000, 0.000000000000000, -1.00000000000000 ) )
#1878 = DIRECTION( '', ( 1.00000000000000, 0.000000000000000, 0.000000000000000 ) )
#1879 = CARTESIAN_POINT( '', ( -76.9177471747059, 22.4057770070404, -1.00000000000000 ) )
#1880 = DIRECTION( '', ( 0.000000000000000, 0.000000000000000, -1.00000000000000 ) )
#1881 = DIRECTION( '', ( 1.00000000000000, 0.000000000000000, 0.000000000000000 ) )
#1882 = DIRECTION( '', ( 0.000000000000000, -1.00000000000000, 0.000000000000000 ) )
#1883 = CARTESIAN_POINT( '', ( -76.9177471747059, 103.405777007040, -1.00000000000000 ) )
#1884 = DIRECTION( '', ( 0.000000000000000, 0.000000000000000, -1.00000000000000 ) )
#1885 = DIRECTION( '', ( 1.00000000000000, 0.000000000000000, 0.000000000000000 ) )
#1886 = DIRECTION( '', ( 1.00000000000000, 0.000000000000000, 0.000000000000000 ) )
#1887 = CARTESIAN_POINT( '', ( 42.5443862627252, 103.405777007040, -1.00000000000000 ) )
#1888 = DIRECTION( '', ( 0.000000000000000, 0.000000000000000, -1.00000000000000 ) )
#1889 = DIRECTION( '', ( 1.00000000000000, 0.000000000000000, 0.000000000000000 ) )
#1890 = DIRECTION( '', ( 0.000000000000000, 1.00000000000000, 0.000000000000000 ) )
#1891 = DIRECTION( '', ( 0.000000000000000, 0.000000000000000, 1.00000000000000 ) )
#1892 = DIRECTION( '', ( 0.000000000000000, 1.00000000000000, 0.000000000000000 ) )
#1893 = DIRECTION( '', ( 0.000000000000000, 0.000000000000000, -1.00000000000000 ) )
#1894 = DIRECTION( '', ( 0.000000000000000, -1.00000000000000, 0.000000000000000 ) )
#1895 = CARTESIAN_POINT( '', ( -9.91263157894742, 47.6557770070401, 1.00000000000000 ) )
#1896 = DIRECTION( '', ( 0.000000000000000, 0.000000000000000, 1.00000000000000 ) )
#1897 = DIRECTION( '', ( -1.00000000000000, 0.000000000000000, 0.000000000000000 ) )
#1898 = DIRECTION( '', ( -1.00000000000000, -1.15648231731787E-016, 0.000000000000000 ) )
#1899 = CARTESIAN_POINT( '', ( -68.4126315789474, 49.4057770070401, 1.00000000000000 ) )
#1900 = DIRECTION( '', ( 0.000000000000000, 0.000000000000000, -1.00000000000000 ) )
#1901 = DIRECTION( '', ( 1.00000000000000, 0.000000000000000, 0.000000000000000 ) )
#1902 = DIRECTION( '', ( 1.00000000000000, 0.000000000000000, 0.000000000000000 ) )
#1903 = DIRECTION( '', ( -1.00000000000000, 0.000000000000000, 0.000000000000000 ) )
#1904 = DIRECTION( '', ( 0.000000000000000, 0.000000000000000, -1.00000000000000 ) )
#1905 = DIRECTION( '', ( -1.00000000000000, -2.31296463463574E-016, 0.000000000000000 ) )
#1906 = DIRECTION( '', ( 0.000000000000000, 0.000000000000000, -1.00000000000000 ) )
#1907 = DIRECTION( '', ( 0.000000000000000, 0.000000000000000, -1.00000000000000 ) )
#1908 = CARTESIAN_POINT( '', ( -39.9126315789474, 92.6557770070399, 1.00000000000000 ) )
#1909 = DIRECTION( '', ( 0.000000000000000, 0.000000000000000, 1.00000000000000 ) )
#1910 = DIRECTION( '', ( -1.00000000000000, 0.000000000000000, 0.000000000000000 ) )
#1911 = DIRECTION( '', ( 0.000000000000000, 0.000000000000000, 1.00000000000000 ) )
#1912 = CARTESIAN_POINT( '', ( -68.4126315789474, 94.4057770070399, 1.00000000000000 ) )
#1913 = DIRECTION( '', ( 0.000000000000000, 0.000000000000000, -1.00000000000000 ) )
#1914 = DIRECTION( '', ( 1.00000000000000, 0.000000000000000, 0.000000000000000 ) )
#1915 = DIRECTION( '', ( 0.000000000000000, 0.000000000000000, 1.00000000000000 ) )
#1916 = DIRECTION( '', ( 0.000000000000000, 1.00000000000000, 0.000000000000000 ) )
#1917 = DIRECTION( '', ( 0.000000000000000, 0.000000000000000, -1.00000000000000 ) )
#1918 = DIRECTION( '', ( 0.000000000000000, 0.000000000000000, 1.00000000000000 ) )
#1919 = CARTESIAN_POINT( '', ( -39.9126315789474, 33.1557770070404, 1.00000000000000 ) )
#1920 = DIRECTION( '', ( 0.000000000000000, 0.000000000000000, 1.00000000000000 ) )
#1921 = DIRECTION( '', ( -1.00000000000000, 0.000000000000000, 0.000000000000000 ) )
#1922 = DIRECTION( '', ( 0.000000000000000, 0.000000000000000, 1.00000000000000 ) )
#1923 = DIRECTION( '', ( 0.000000000000000, 0.000000000000000, -1.00000000000000 ) )
#1924 = DIRECTION( '', ( 1.00000000000000, 0.000000000000000, 0.000000000000000 ) )
#1925 = DIRECTION( '', ( 1.00000000000000, 0.000000000000000, 0.000000000000000 ) )
#1926 = CARTESIAN_POINT( '', ( 21.5873684210526, 49.4057770070401, 1.00000000000000 ) )
#1927 = DIRECTION( '', ( 0.000000000000000, 0.000000000000000, -1.00000000000000 ) )
#1928 = DIRECTION( '', ( -1.00000000000000, 0.000000000000000, 0.000000000000000 ) )
#1929 = DIRECTION( '', ( -1.00000000000000, -1.15648231731787E-016, 0.000000000000000 ) )
#1930 = CARTESIAN_POINT( '', ( -68.4126315789474, 58.4057770070400, 1.00000000000000 ) )
#1931 = DIRECTION( '', ( 0.000000000000000, 0.000000000000000, -1.00000000000000 ) )
#1932 = DIRECTION( '', ( 1.00000000000000, 0.000000000000000, 0.000000000000000 ) )
#1933 = DIRECTION( '', ( 1.00000000000000, 0.000000000000000, 0.000000000000000 ) )
#1934 = CARTESIAN_POINT( '', ( 21.5873684210526, 49.4057770070401, 1.00000000000000 ) )
#1935 = DIRECTION( '', ( 0.000000000000000, 0.000000000000000, 1.00000000000000 ) )
#1936 = DIRECTION( '', ( -1.00000000000000, 0.000000000000000, 0.000000000000000 ) )
#1937 = DIRECTION( '', ( -1.00000000000000, -7.70988211545248E-017, 0.000000000000000 ) )
#1938 = CARTESIAN_POINT( '', ( -68.4126315789474, 40.4057770070402, 1.00000000000000 ) )
#1939 = DIRECTION( '', ( 0.000000000000000, 0.000000000000000, -1.00000000000000 ) )
#1940 = DIRECTION( '', ( 1.00000000000000, 0.000000000000000, 0.000000000000000 ) )
#1941 = DIRECTION( '', ( 1.00000000000000, 0.000000000000000, 0.000000000000000 ) )
#1942 = DIRECTION( '', ( 0.000000000000000, -1.00000000000000, 0.000000000000000 ) )
#1943 = CARTESIAN_POINT( '', ( -39.4126315789474, 32.6557770070404, 1.00000000000000 ) )
#1944 = DIRECTION( '', ( 0.000000000000000, 0.000000000000000, -1.00000000000000 ) )
#1945 = DIRECTION( '', ( -1.00000000000000, 0.000000000000000, 0.000000000000000 ) )
#1946 = DIRECTION( '', ( -1.00000000000000, -2.31296463463574E-016, 0.000000000000000 ) )
#1947 = CARTESIAN_POINT( '', ( -68.4126315789474, 31.4057770070404, 1.00000000000000 ) )
#1948 = DIRECTION( '', ( 0.000000000000000, 0.000000000000000, -1.00000000000000 ) )
#1949 = DIRECTION( '', ( 1.00000000000000, 0.000000000000000, 0.000000000000000 ) )
#1950 = DIRECTION( '', ( 0.000000000000000, 0.000000000000000, -1.00000000000000 ) )
#1951 = DIRECTION( '', ( -1.00000000000000, -1.25285584376103E-016, 0.000000000000000 ) )
#1952 = DIRECTION( '', ( 0.000000000000000, 0.000000000000000, -1.00000000000000 ) )
#1953 = DIRECTION( '', ( 0.000000000000000, 0.000000000000000, 1.00000000000000 ) )
#1954 = DIRECTION( '', ( 1.00000000000000, 0.000000000000000, 0.000000000000000 ) )
#1955 = DIRECTION( '', ( 0.000000000000000, 0.000000000000000, -1.00000000000000 ) )
#1956 = DIRECTION( '', ( 0.000000000000000, 0.000000000000000, 1.00000000000000 ) )
#1957 = DIRECTION( '', ( 0.000000000000000, 0.000000000000000, -1.00000000000000 ) )
#1958 = DIRECTION( '', ( 1.00000000000000, 0.000000000000000, 0.000000000000000 ) )
#1959 = DIRECTION( '', ( 0.000000000000000, -1.00000000000000, 0.000000000000000 ) )
#1960 = DIRECTION( '', ( 1.00000000000000, -1.15648231731787E-016, 0.000000000000000 ) )
#1961 = CARTESIAN_POINT( '', ( -39.4126315789474, 93.1557770070399, 1.00000000000000 ) )
#1962 = DIRECTION( '', ( 0.000000000000000, 0.000000000000000, -1.00000000000000 ) )
#1963 = DIRECTION( '', ( -1.00000000000000, 0.000000000000000, 0.000000000000000 ) )
#1964 = DIRECTION( '', ( 0.000000000000000, 1.00000000000000, 0.000000000000000 ) )
#1965 = DIRECTION( '', ( -1.00000000000000, 0.000000000000000, 0.000000000000000 ) )
#1966 = DIRECTION( '', ( 0.000000000000000, 0.000000000000000, -1.00000000000000 ) )
#1967 = DIRECTION( '', ( 0.000000000000000, 0.000000000000000, 1.00000000000000 ) )
#1968 = CARTESIAN_POINT( '', ( -68.4126315789474, 76.4057770070398, 1.00000000000000 ) )
#1969 = DIRECTION( '', ( 0.000000000000000, 0.000000000000000, -1.00000000000000 ) )
#1970 = DIRECTION( '', ( 1.00000000000000, 0.000000000000000, 0.000000000000000 ) )
#1971 = DIRECTION( '', ( 0.000000000000000, 0.000000000000000, -1.00000000000000 ) )
#1972 = DIRECTION( '', ( 0.000000000000000, 0.000000000000000, 1.00000000000000 ) )
#1973 = DIRECTION( '', ( 0.000000000000000, 0.000000000000000, 1.00000000000000 ) )
#1974 = DIRECTION( '', ( 0.000000000000000, 0.000000000000000, -1.00000000000000 ) )
#1975 = CARTESIAN_POINT( '', ( -9.41263157894738, 77.6557770070398, 1.00000000000000 ) )
#1976 = DIRECTION( '', ( 0.000000000000000, 0.000000000000000, -1.00000000000000 ) )
#1977 = DIRECTION( '', ( -1.00000000000000, 0.000000000000000, 0.000000000000000 ) )
#1978 = DIRECTION( '', ( 0.000000000000000, 0.000000000000000, 1.00000000000000 ) )
#1979 = DIRECTION( '', ( 0.000000000000000, 0.000000000000000, -1.00000000000000 ) )
#1980 = DIRECTION( '', ( 0.000000000000000, 0.000000000000000, -1.00000000000000 ) )
#1981 = DIRECTION( '', ( 0.000000000000000, 0.000000000000000, -1.00000000000000 ) )
#1982 = DIRECTION( '', ( 0.000000000000000, 0.000000000000000, 1.00000000000000 ) )
#1983 = DIRECTION( '', ( 0.000000000000000, 0.000000000000000, -1.00000000000000 ) )
#1984 = DIRECTION( '', ( 1.00000000000000, 0.000000000000000, 0.000000000000000 ) )
#1985 = CARTESIAN_POINT( '', ( -9.91263157894738, 78.1557770070398, 1.00000000000000 ) )
#1986 = DIRECTION( '', ( 0.000000000000000, 0.000000000000000, 1.00000000000000 ) )
#1987 = DIRECTION( '', ( -1.00000000000000, 0.000000000000000, 0.000000000000000 ) )
#1988 = DIRECTION( '', ( 0.000000000000000, 1.00000000000000, 0.000000000000000 ) )
#1989 = DIRECTION( '', ( -1.00000000000000, -1.15648231731787E-016, 0.000000000000000 ) )
#1990 = CARTESIAN_POINT( '', ( 21.5873684210525, 76.4057770070398, 1.00000000000000 ) )
#1991 = DIRECTION( '', ( 0.000000000000000, 0.000000000000000, -1.00000000000000 ) )
#1992 = DIRECTION( '', ( -1.00000000000000, 0.000000000000000, 0.000000000000000 ) )
#1993 = CARTESIAN_POINT( '', ( -68.4126315789474, 67.4057770070399, 1.00000000000000 ) )
#1994 = DIRECTION( '', ( 0.000000000000000, 0.000000000000000, -1.00000000000000 ) )
#1995 = DIRECTION( '', ( 1.00000000000000, 0.000000000000000, 0.000000000000000 ) )
#1996 = CARTESIAN_POINT( '', ( 21.5873684210525, 76.4057770070398, 1.00000000000000 ) )
#1997 = DIRECTION( '', ( 0.000000000000000, 0.000000000000000, 1.00000000000000 ) )
#1998 = DIRECTION( '', ( -1.00000000000000, 0.000000000000000, 0.000000000000000 ) )
#1999 = CARTESIAN_POINT( '', ( -68.4126315789474, 85.4057770070399, 1.00000000000000 ) )
#2000 = DIRECTION( '', ( 0.000000000000000, 0.000000000000000, -1.00000000000000 ) )
#2001 = DIRECTION( '', ( 1.00000000000000, 0.000000000000000, 0.000000000000000 ) )
#2002 = DIRECTION( '', ( -1.00000000000000, -1.15648231731787E-016, 0.000000000000000 ) )
#2003 = DIRECTION( '', ( 0.000000000000000, -1.00000000000000, 0.000000000000000 ) )
#2004 = DIRECTION( '', ( -1.00000000000000, -1.15648231731787E-016, 0.000000000000000 ) )
#2005 = DIRECTION( '', ( 0.000000000000000, 0.000000000000000, -1.00000000000000 ) )
#2006 = DIRECTION( '', ( 0.000000000000000, 0.000000000000000, -1.00000000000000 ) )
#2007 = DIRECTION( '', ( 0.000000000000000, 0.000000000000000, -1.00000000000000 ) )
#2008 = DIRECTION( '', ( 0.000000000000000, 0.000000000000000, -1.00000000000000 ) )
#2009 = DIRECTION( '', ( 0.000000000000000, 0.000000000000000, 1.00000000000000 ) )
#2010 = DIRECTION( '', ( 0.000000000000000, 0.000000000000000, 1.00000000000000 ) )
#2011 = DIRECTION( '', ( 0.000000000000000, 0.000000000000000, -1.00000000000000 ) )
[truncated: 18 more rows]
