# Supplementary material for: Microfluidics on liquid handling stations (μF-on-LHS): an industry compatible chip interface between microfluidics and automated liquid handling stations
Source: Royal Society of Chemistry journal article supplement (doi:10.1039/c3lc00042g), 2013-01-01
Supplement: c3lc00042g_4.stp [file c3lc00042g_4.stp]

ISO-10303-21
HEADER
FILE_DESCRIPTION( ( 'Unknown' ), '1' )
FILE_NAME( 'D:/Arbeitsbackup20130226/Ver�ffentlichungen/LabChip/�F-on-LHS/Revision/Replication_master_as_used.stp', 'Unknown', ( 'Unknown' ), ( 'Unknown' ), 'XStep 1.0', 'Unknown', ' ' )
FILE_SCHEMA( ( 'CONFIG_CONTROL_DESIGN' ) )
ENDSEC
DATA
#1 = DESIGN_CONTEXT( '', #27, 'design' )
#2 = APPLICATION_PROTOCOL_DEFINITION( 'INTERNATIONAL STANDARD', 'config_control_design', 1994, #27 )
#3 = PRODUCT_CATEGORY_RELATIONSHIP( 'NONE', 'NONE', #28, #29 )
#4 = DATE_AND_TIME( #30, #31 )
#5 = DATE_TIME_ROLE( 'creation_date' )
#6 = DATE_TIME_ROLE( 'classification_date' )
#7 = PERSON_AND_ORGANIZATION_ROLE( 'creator' )
#8 = PERSON_AND_ORGANIZATION_ROLE( 'design_supplier' )
#9 = PERSON_AND_ORGANIZATION_ROLE( 'classification_officer' )
#10 = PERSON_AND_ORGANIZATION_ROLE( 'design_owner' )
#11 = APPROVAL_PERSON_ORGANIZATION( #32, #33, #34 )
#12 = APPROVAL_DATE_TIME( #4, #33 )
#13 = CC_DESIGN_APPROVAL( #33, ( #35, #36, #37 ) )
#14 = CC_DESIGN_DATE_AND_TIME_ASSIGNMENT( #4, #5, ( #37 ) )
#15 = CC_DESIGN_DATE_AND_TIME_ASSIGNMENT( #4, #6, ( #35 ) )
#16 = CC_DESIGN_PERSON_AND_ORGANIZATION_ASSIGNMENT( #32, #10, ( #38 ) )
#17 = CC_DESIGN_PERSON_AND_ORGANIZATION_ASSIGNMENT( #32, #7, ( #37 ) )
#18 = CC_DESIGN_PERSON_AND_ORGANIZATION_ASSIGNMENT( #32, #7, ( #36 ) )
#19 = CC_DESIGN_PERSON_AND_ORGANIZATION_ASSIGNMENT( #32, #8, ( #36 ) )
#20 = CC_DESIGN_SECURITY_CLASSIFICATION( #35, ( #36 ) )
#21 = CC_DESIGN_PERSON_AND_ORGANIZATION_ASSIGNMENT( #32, #9, ( #35 ) )
#22 = SHAPE_DEFINITION_REPRESENTATION( #39, #40 )
#23 = ( GEOMETRIC_REPRESENTATION_CONTEXT( 3 )GLOBAL_UNCERTAINTY_ASSIGNED_CONTEXT( ( #43 ) )GLOBAL_UNIT_ASSIGNED_CONTEXT( ( #45, #46, #47 ) )REPRESENTATION_CONTEXT( 'NONE', 'WORKSPACE' ) )
#27 = APPLICATION_CONTEXT( 'CONFIGURATION CONTROLLED 3D DESIGNS OF MECHANICAL PARTS AND ASSEMBLIES' )
#28 = PRODUCT_CATEGORY( 'part', 'NONE' )
#29 = PRODUCT_RELATED_PRODUCT_CATEGORY( 'detail', ' ', ( #38 ) )
#30 = CALENDAR_DATE( 2013, 21, 2 )
#31 = LOCAL_TIME( 9, 39, 46.0000000000000, #49 )
#32 = PERSON_AND_ORGANIZATION( #50, #51 )
#33 = APPROVAL( #52, 'SOLID MODEL' )
#34 = APPROVAL_ROLE( 'APPROVED' )
#35 = SECURITY_CLASSIFICATION( '', '', #53 )
#36 = PRODUCT_DEFINITION_FORMATION_WITH_SPECIFIED_SOURCE( ' ', 'NONE', #38, .NOT_KNOWN. )
#37 = PRODUCT_DEFINITION( 'NONE', 'NONE', #36, #1 )
#38 = PRODUCT( '1', '1', 'PART-1-DESC', ( #54 ) )
#39 = PRODUCT_DEFINITION_SHAPE( 'NONE', 'NONE', #37 )
#40 = ADVANCED_BREP_SHAPE_REPRESENTATION( '1', ( #55, #56 ), #23 )
#43 = UNCERTAINTY_MEASURE_WITH_UNIT( LENGTH_MEASURE( 0.00100000000000000 ), #45, '', '' )
#45 = ( CONVERSION_BASED_UNIT( 'MILLIMETRE', #59 )LENGTH_UNIT( )NAMED_UNIT( #62 ) )
#46 = ( NAMED_UNIT( #64 )PLANE_ANGLE_UNIT( )SI_UNIT( $, .RADIAN. ) )
#47 = ( NAMED_UNIT( #64 )SOLID_ANGLE_UNIT( )SI_UNIT( $, .STERADIAN. ) )
#49 = COORDINATED_UNIVERSAL_TIME_OFFSET( 1, 0, .AHEAD. )
#50 = PERSON( '', 'UNSPECIFIED', $, $, $, $ )
#51 = ORGANIZATION( 'UNSPECIFIED', 'UNSPECIFIED', 'UNSPECIFIED' )
#52 = APPROVAL_STATUS( 'approved' )
#53 = SECURITY_CLASSIFICATION_LEVEL( 'unclassified' )
#54 = MECHANICAL_CONTEXT( '', #27, 'mechanical' )
#55 = MANIFOLD_SOLID_BREP( '1', #70 )
#56 = AXIS2_PLACEMENT_3D( '', #71, #72, #73 )
#59 = LENGTH_MEASURE_WITH_UNIT( LENGTH_MEASURE( 1.00000000000000 ), #74 )
#62 = DIMENSIONAL_EXPONENTS( 1.00000000000000, 0.000000000000000, 0.000000000000000, 0.000000000000000, 0.000000000000000, 0.000000000000000, 0.000000000000000 )
#64 = DIMENSIONAL_EXPONENTS( 0.000000000000000, 0.000000000000000, 0.000000000000000, 0.000000000000000, 0.000000000000000, 0.000000000000000, 0.000000000000000 )
#70 = CLOSED_SHELL( '', ( #75, #76, #77, #78, #79, #80, #81, #82, #83, #84, #85, #86, #87, #88, #89, #90, #91, #92, #93, #94, #95, #96, #97, #98, #99, #100, #101, #102, #103, #104, #105, #106, #107, #108, #109, #110, #111, #112, #113, #114, #115, #116, #117, #118, #119, #120, #121, #122, #123, #124, #125, #126, #127, #128, #129, #130, #131, #132, #133, #134, #135, #136, #137, #138, #139, #140, #1…
#71 = CARTESIAN_POINT( '', ( 0.000000000000000, 0.000000000000000, 0.000000000000000 ) )
#72 = DIRECTION( '', ( 0.000000000000000, 0.000000000000000, 1.00000000000000 ) )
#73 = DIRECTION( '', ( 1.00000000000000, 0.000000000000000, 0.000000000000000 ) )
#74 = ( NAMED_UNIT( #62 )LENGTH_UNIT( )SI_UNIT( .MILLI., .METRE. ) )
#75 = ADVANCED_FACE( '', ( #378, #379, #380 ), #381, .T. )
#76 = ADVANCED_FACE( '', ( #382 ), #383, .T. )
#77 = ADVANCED_FACE( '', ( #384 ), #385, .F. )
#78 = ADVANCED_FACE( '', ( #386 ), #387, .F. )
#79 = ADVANCED_FACE( '', ( #388 ), #389, .T. )
#80 = ADVANCED_FACE( '', ( #390 ), #391, .T. )
#81 = ADVANCED_FACE( '', ( #392 ), #393, .T. )
#82 = ADVANCED_FACE( '', ( #394 ), #395, .T. )
#83 = ADVANCED_FACE( '', ( #396, #397 ), #398, .T. )
#84 = ADVANCED_FACE( '', ( #399 ), #400, .T. )
#85 = ADVANCED_FACE( '', ( #401 ), #402, .T. )
#86 = ADVANCED_FACE( '', ( #403 ), #404, .F. )
#87 = ADVANCED_FACE( '', ( #405 ), #406, .T. )
#88 = ADVANCED_FACE( '', ( #407 ), #408, .T. )
#89 = ADVANCED_FACE( '', ( #409 ), #410, .T. )
#90 = ADVANCED_FACE( '', ( #411 ), #412, .T. )
#91 = ADVANCED_FACE( '', ( #413 ), #414, .F. )
#92 = ADVANCED_FACE( '', ( #415 ), #416, .T. )
#93 = ADVANCED_FACE( '', ( #417 ), #418, .T. )
#94 = ADVANCED_FACE( '', ( #419 ), #420, .T. )
#95 = ADVANCED_FACE( '', ( #421 ), #422, .F. )
#96 = ADVANCED_FACE( '', ( #423 ), #424, .T. )
#97 = ADVANCED_FACE( '', ( #425 ), #426, .T. )
#98 = ADVANCED_FACE( '', ( #427 ), #428, .T. )
#99 = ADVANCED_FACE( '', ( #429 ), #430, .F. )
#100 = ADVANCED_FACE( '', ( #431 ), #432, .T. )
#101 = ADVANCED_FACE( '', ( #433 ), #434, .T. )
#102 = ADVANCED_FACE( '', ( #435 ), #436, .T. )
#103 = ADVANCED_FACE( '', ( #437 ), #438, .F. )
#104 = ADVANCED_FACE( '', ( #439 ), #440, .T. )
#105 = ADVANCED_FACE( '', ( #441 ), #442, .T. )
#106 = ADVANCED_FACE( '', ( #443 ), #444, .T. )
#107 = ADVANCED_FACE( '', ( #445 ), #446, .F. )
#108 = ADVANCED_FACE( '', ( #447 ), #448, .T. )
#109 = ADVANCED_FACE( '', ( #449 ), #450, .T. )
#110 = ADVANCED_FACE( '', ( #451 ), #452, .T. )
#111 = ADVANCED_FACE( '', ( #453 ), #454, .F. )
#112 = ADVANCED_FACE( '', ( #455 ), #456, .T. )
#113 = ADVANCED_FACE( '', ( #457 ), #458, .T. )
#114 = ADVANCED_FACE( '', ( #459 ), #460, .T. )
#115 = ADVANCED_FACE( '', ( #461 ), #462, .F. )
#116 = ADVANCED_FACE( '', ( #463 ), #464, .T. )
#117 = ADVANCED_FACE( '', ( #465 ), #466, .T. )
#118 = ADVANCED_FACE( '', ( #467 ), #468, .T. )
#119 = ADVANCED_FACE( '', ( #469 ), #470, .F. )
#120 = ADVANCED_FACE( '', ( #471 ), #472, .T. )
#121 = ADVANCED_FACE( '', ( #473 ), #474, .T. )
#122 = ADVANCED_FACE( '', ( #475 ), #476, .T. )
#123 = ADVANCED_FACE( '', ( #477 ), #478, .F. )
#124 = ADVANCED_FACE( '', ( #479 ), #480, .T. )
#125 = ADVANCED_FACE( '', ( #481 ), #482, .T. )
#126 = ADVANCED_FACE( '', ( #483 ), #484, .T. )
#127 = ADVANCED_FACE( '', ( #485 ), #486, .F. )
#128 = ADVANCED_FACE( '', ( #487 ), #488, .T. )
#129 = ADVANCED_FACE( '', ( #489 ), #490, .T. )
#130 = ADVANCED_FACE( '', ( #491 ), #492, .T. )
#131 = ADVANCED_FACE( '', ( #493 ), #494, .F. )
#132 = ADVANCED_FACE( '', ( #495 ), #496, .T. )
#133 = ADVANCED_FACE( '', ( #497 ), #498, .T. )
#134 = ADVANCED_FACE( '', ( #499 ), #500, .T. )
#135 = ADVANCED_FACE( '', ( #501 ), #502, .F. )
#136 = ADVANCED_FACE( '', ( #503 ), #504, .T. )
#137 = ADVANCED_FACE( '', ( #505 ), #506, .T. )
#138 = ADVANCED_FACE( '', ( #507 ), #508, .F. )
#139 = ADVANCED_FACE( '', ( #509 ), #510, .F. )
#140 = ADVANCED_FACE( '', ( #511 ), #512, .F. )
#141 = ADVANCED_FACE( '', ( #513 ), #514, .T. )
#142 = ADVANCED_FACE( '', ( #515 ), #516, .T. )
#143 = ADVANCED_FACE( '', ( #517 ), #518, .F. )
#144 = ADVANCED_FACE( '', ( #519 ), #520, .F. )
#145 = ADVANCED_FACE( '', ( #521 ), #522, .F. )
#146 = ADVANCED_FACE( '', ( #523 ), #524, .T. )
#147 = ADVANCED_FACE( '', ( #525 ), #526, .T. )
#148 = ADVANCED_FACE( '', ( #527 ), #528, .T. )
#149 = ADVANCED_FACE( '', ( #529 ), #530, .T. )
#150 = ADVANCED_FACE( '', ( #531 ), #532, .F. )
#151 = ADVANCED_FACE( '', ( #533 ), #534, .T. )
#152 = ADVANCED_FACE( '', ( #535 ), #536, .F. )
#153 = ADVANCED_FACE( '', ( #537 ), #538, .T. )
#154 = ADVANCED_FACE( '', ( #539 ), #540, .T. )
#155 = ADVANCED_FACE( '', ( #541 ), #542, .F. )
#156 = ADVANCED_FACE( '', ( #543 ), #544, .T. )
#157 = ADVANCED_FACE( '', ( #545 ), #546, .F. )
#158 = ADVANCED_FACE( '', ( #547 ), #548, .T. )
#159 = ADVANCED_FACE( '', ( #549 ), #550, .T. )
#160 = ADVANCED_FACE( '', ( #551 ), #552, .T. )
#161 = ADVANCED_FACE( '', ( #553 ), #554, .T. )
#162 = ADVANCED_FACE( '', ( #555 ), #556, .T. )
#163 = ADVANCED_FACE( '', ( #557 ), #558, .F. )
#164 = ADVANCED_FACE( '', ( #559 ), #560, .T. )
#165 = ADVANCED_FACE( '', ( #561 ), #562, .T. )
#166 = ADVANCED_FACE( '', ( #563 ), #564, .T. )
#167 = ADVANCED_FACE( '', ( #565 ), #566, .T. )
#168 = ADVANCED_FACE( '', ( #567 ), #568, .F. )
#169 = ADVANCED_FACE( '', ( #569 ), #570, .T. )
#170 = ADVANCED_FACE( '', ( #571 ), #572, .T. )
#171 = ADVANCED_FACE( '', ( #573 ), #574, .T. )
#172 = ADVANCED_FACE( '', ( #575 ), #576, .F. )
#173 = ADVANCED_FACE( '', ( #577 ), #578, .T. )
#174 = ADVANCED_FACE( '', ( #579 ), #580, .T. )
#175 = ADVANCED_FACE( '', ( #581 ), #582, .T. )
#176 = ADVANCED_FACE( '', ( #583 ), #584, .F. )
#177 = ADVANCED_FACE( '', ( #585 ), #586, .T. )
#178 = ADVANCED_FACE( '', ( #587 ), #588, .T. )
#179 = ADVANCED_FACE( '', ( #589 ), #590, .T. )
#180 = ADVANCED_FACE( '', ( #591 ), #592, .F. )
#181 = ADVANCED_FACE( '', ( #593 ), #594, .T. )
#182 = ADVANCED_FACE( '', ( #595 ), #596, .T. )
#183 = ADVANCED_FACE( '', ( #597 ), #598, .T. )
#184 = ADVANCED_FACE( '', ( #599 ), #600, .F. )
#185 = ADVANCED_FACE( '', ( #601 ), #602, .T. )
#186 = ADVANCED_FACE( '', ( #603 ), #604, .T. )
#187 = ADVANCED_FACE( '', ( #605 ), #606, .T. )
#188 = ADVANCED_FACE( '', ( #607 ), #608, .F. )
#189 = ADVANCED_FACE( '', ( #609 ), #610, .T. )
#190 = ADVANCED_FACE( '', ( #611 ), #612, .T. )
#191 = ADVANCED_FACE( '', ( #613 ), #614, .T. )
#192 = ADVANCED_FACE( '', ( #615 ), #616, .F. )
#193 = ADVANCED_FACE( '', ( #617 ), #618, .T. )
#194 = ADVANCED_FACE( '', ( #619 ), #620, .T. )
#195 = ADVANCED_FACE( '', ( #621 ), #622, .T. )
#196 = ADVANCED_FACE( '', ( #623 ), #624, .F. )
#197 = ADVANCED_FACE( '', ( #625 ), #626, .T. )
#198 = ADVANCED_FACE( '', ( #627 ), #628, .T. )
#199 = ADVANCED_FACE( '', ( #629 ), #630, .T. )
#200 = ADVANCED_FACE( '', ( #631 ), #632, .F. )
#201 = ADVANCED_FACE( '', ( #633 ), #634, .T. )
#202 = ADVANCED_FACE( '', ( #635 ), #636, .T. )
#203 = ADVANCED_FACE( '', ( #637 ), #638, .T. )
#204 = ADVANCED_FACE( '', ( #639 ), #640, .F. )
#205 = ADVANCED_FACE( '', ( #641 ), #642, .T. )
#206 = ADVANCED_FACE( '', ( #643 ), #644, .T. )
#207 = ADVANCED_FACE( '', ( #645 ), #646, .T. )
#208 = ADVANCED_FACE( '', ( #647 ), #648, .F. )
#209 = ADVANCED_FACE( '', ( #649, #650 ), #651, .T. )
#210 = ADVANCED_FACE( '', ( #652 ), #653, .F. )
#211 = ADVANCED_FACE( '', ( #654 ), #655, .F. )
#212 = ADVANCED_FACE( '', ( #656 ), #657, .F. )
#213 = ADVANCED_FACE( '', ( #658 ), #659, .T. )
#214 = ADVANCED_FACE( '', ( #660 ), #661, .T. )
#215 = ADVANCED_FACE( '', ( #662 ), #663, .T. )
#216 = ADVANCED_FACE( '', ( #664 ), #665, .T. )
#217 = ADVANCED_FACE( '', ( #666 ), #667, .F. )
#218 = ADVANCED_FACE( '', ( #668 ), #669, .T. )
#219 = ADVANCED_FACE( '', ( #670 ), #671, .T. )
#220 = ADVANCED_FACE( '', ( #672 ), #673, .F. )
#221 = ADVANCED_FACE( '', ( #674 ), #675, .F. )
#222 = ADVANCED_FACE( '', ( #676 ), #677, .F. )
#223 = ADVANCED_FACE( '', ( #678 ), #679, .T. )
#224 = ADVANCED_FACE( '', ( #680 ), #681, .F. )
#225 = ADVANCED_FACE( '', ( #682 ), #683, .F. )
#226 = ADVANCED_FACE( '', ( #684 ), #685, .T. )
#227 = ADVANCED_FACE( '', ( #686 ), #687, .F. )
#228 = ADVANCED_FACE( '', ( #688 ), #689, .T. )
#229 = ADVANCED_FACE( '', ( #690 ), #691, .F. )
#230 = ADVANCED_FACE( '', ( #692 ), #693, .T. )
#231 = ADVANCED_FACE( '', ( #694 ), #695, .T. )
#232 = ADVANCED_FACE( '', ( #696 ), #697, .F. )
#233 = ADVANCED_FACE( '', ( #698 ), #699, .T. )
#234 = ADVANCED_FACE( '', ( #700 ), #701, .T. )
#235 = ADVANCED_FACE( '', ( #702 ), #703, .F. )
#236 = ADVANCED_FACE( '', ( #704 ), #705, .T. )
#237 = ADVANCED_FACE( '', ( #706 ), #707, .T. )
#238 = ADVANCED_FACE( '', ( #708 ), #709, .F. )
#239 = ADVANCED_FACE( '', ( #710 ), #711, .T. )
#240 = ADVANCED_FACE( '', ( #712 ), #713, .T. )
#241 = ADVANCED_FACE( '', ( #714 ), #715, .F. )
#242 = ADVANCED_FACE( '', ( #716 ), #717, .F. )
#243 = ADVANCED_FACE( '', ( #718 ), #719, .F. )
#244 = ADVANCED_FACE( '', ( #720 ), #721, .T. )
#245 = ADVANCED_FACE( '', ( #722 ), #723, .F. )
#246 = ADVANCED_FACE( '', ( #724 ), #725, .F. )
#247 = ADVANCED_FACE( '', ( #726 ), #727, .T. )
#248 = ADVANCED_FACE( '', ( #728 ), #729, .T. )
#249 = ADVANCED_FACE( '', ( #730 ), #731, .F. )
#250 = ADVANCED_FACE( '', ( #732 ), #733, .F. )
#251 = ADVANCED_FACE( '', ( #734 ), #735, .F. )
#252 = ADVANCED_FACE( '', ( #736, #737 ), #738, .T. )
#253 = ADVANCED_FACE( '', ( #739 ), #740, .T. )
#254 = ADVANCED_FACE( '', ( #741 ), #742, .F. )
#255 = ADVANCED_FACE( '', ( #743 ), #744, .T. )
#256 = ADVANCED_FACE( '', ( #745 ), #746, .F. )
#257 = ADVANCED_FACE( '', ( #747 ), #748, .T. )
#258 = ADVANCED_FACE( '', ( #749 ), #750, .F. )
#259 = ADVANCED_FACE( '', ( #751 ), #752, .T. )
#260 = ADVANCED_FACE( '', ( #753 ), #754, .T. )
#261 = ADVANCED_FACE( '', ( #755 ), #756, .F. )
#262 = ADVANCED_FACE( '', ( #757 ), #758, .F. )
#263 = ADVANCED_FACE( '', ( #759 ), #760, .T. )
#264 = ADVANCED_FACE( '', ( #761 ), #762, .F. )
#265 = ADVANCED_FACE( '', ( #763 ), #764, .F. )
#266 = ADVANCED_FACE( '', ( #765 ), #766, .F. )
#267 = ADVANCED_FACE( '', ( #767 ), #768, .F. )
#268 = ADVANCED_FACE( '', ( #769 ), #770, .F. )
#269 = ADVANCED_FACE( '', ( #771 ), #772, .F. )
#270 = ADVANCED_FACE( '', ( #773 ), #774, .F. )
#271 = ADVANCED_FACE( '', ( #775 ), #776, .F. )
#272 = ADVANCED_FACE( '', ( #777 ), #778, .F. )
#273 = ADVANCED_FACE( '', ( #779 ), #780, .F. )
#274 = ADVANCED_FACE( '', ( #781 ), #782, .T. )
#275 = ADVANCED_FACE( '', ( #783 ), #784, .F. )
#276 = ADVANCED_FACE( '', ( #785 ), #786, .T. )
#277 = ADVANCED_FACE( '', ( #787 ), #788, .F. )
#278 = ADVANCED_FACE( '', ( #789 ), #790, .T. )
#279 = ADVANCED_FACE( '', ( #791 ), #792, .T. )
#280 = ADVANCED_FACE( '', ( #793 ), #794, .F. )
#281 = ADVANCED_FACE( '', ( #795 ), #796, .F. )
#282 = ADVANCED_FACE( '', ( #797 ), #798, .T. )
#283 = ADVANCED_FACE( '', ( #799 ), #800, .T. )
#284 = ADVANCED_FACE( '', ( #801 ), #802, .F. )
#285 = ADVANCED_FACE( '', ( #803 ), #804, .T. )
#286 = ADVANCED_FACE( '', ( #805 ), #806, .T. )
#287 = ADVANCED_FACE( '', ( #807 ), #808, .T. )
#288 = ADVANCED_FACE( '', ( #809 ), #810, .F. )
#289 = ADVANCED_FACE( '', ( #811 ), #812, .F. )
#290 = ADVANCED_FACE( '', ( #813 ), #814, .F. )
#291 = ADVANCED_FACE( '', ( #815 ), #816, .F. )
#292 = ADVANCED_FACE( '', ( #817 ), #818, .F. )
#293 = ADVANCED_FACE( '', ( #819 ), #820, .T. )
#294 = ADVANCED_FACE( '', ( #821, #822 ), #823, .T. )
#295 = ADVANCED_FACE( '', ( #824 ), #825, .F. )
#296 = ADVANCED_FACE( '', ( #826 ), #827, .F. )
#297 = ADVANCED_FACE( '', ( #828 ), #829, .F. )
#298 = ADVANCED_FACE( '', ( #830 ), #831, .T. )
#299 = ADVANCED_FACE( '', ( #832 ), #833, .F. )
#300 = ADVANCED_FACE( '', ( #834 ), #835, .F. )
#301 = ADVANCED_FACE( '', ( #836 ), #837, .T. )
#302 = ADVANCED_FACE( '', ( #838 ), #839, .F. )
#303 = ADVANCED_FACE( '', ( #840, #841 ), #842, .T. )
#304 = ADVANCED_FACE( '', ( #843 ), #844, .F. )
#305 = ADVANCED_FACE( '', ( #845 ), #846, .F. )
#306 = ADVANCED_FACE( '', ( #847 ), #848, .F. )
#307 = ADVANCED_FACE( '', ( #849 ), #850, .T. )
#308 = ADVANCED_FACE( '', ( #851 ), #852, .T. )
#309 = ADVANCED_FACE( '', ( #853 ), #854, .F. )
#310 = ADVANCED_FACE( '', ( #855 ), #856, .F. )
#311 = ADVANCED_FACE( '', ( #857 ), #858, .T. )
#312 = ADVANCED_FACE( '', ( #859 ), #860, .F. )
#313 = ADVANCED_FACE( '', ( #861 ), #862, .F. )
#314 = ADVANCED_FACE( '', ( #863 ), #864, .F. )
#315 = ADVANCED_FACE( '', ( #865 ), #866, .F. )
#316 = ADVANCED_FACE( '', ( #867 ), #868, .F. )
#317 = ADVANCED_FACE( '', ( #869 ), #870, .F. )
#318 = ADVANCED_FACE( '', ( #871 ), #872, .F. )
#319 = ADVANCED_FACE( '', ( #873 ), #874, .T. )
#320 = ADVANCED_FACE( '', ( #875 ), #876, .F. )
#321 = ADVANCED_FACE( '', ( #877 ), #878, .T. )
#322 = ADVANCED_FACE( '', ( #879 ), #880, .F. )
#323 = ADVANCED_FACE( '', ( #881 ), #882, .F. )
#324 = ADVANCED_FACE( '', ( #883 ), #884, .F. )
#325 = ADVANCED_FACE( '', ( #885 ), #886, .F. )
#326 = ADVANCED_FACE( '', ( #887 ), #888, .F. )
#327 = ADVANCED_FACE( '', ( #889 ), #890, .F. )
#328 = ADVANCED_FACE( '', ( #891 ), #892, .F. )
#329 = ADVANCED_FACE( '', ( #893 ), #894, .T. )
#330 = ADVANCED_FACE( '', ( #895 ), #896, .T. )
#331 = ADVANCED_FACE( '', ( #897 ), #898, .F. )
#332 = ADVANCED_FACE( '', ( #899 ), #900, .F. )
#333 = ADVANCED_FACE( '', ( #901 ), #902, .T. )
#334 = ADVANCED_FACE( '', ( #903 ), #904, .T. )
#335 = ADVANCED_FACE( '', ( #905 ), #906, .T. )
#336 = ADVANCED_FACE( '', ( #907 ), #908, .T. )
#337 = ADVANCED_FACE( '', ( #909 ), #910, .F. )
#338 = ADVANCED_FACE( '', ( #911 ), #912, .T. )
#339 = ADVANCED_FACE( '', ( #913 ), #914, .F. )
#340 = ADVANCED_FACE( '', ( #915 ), #916, .F. )
#341 = ADVANCED_FACE( '', ( #917 ), #918, .F. )
#342 = ADVANCED_FACE( '', ( #919 ), #920, .F. )
#343 = ADVANCED_FACE( '', ( #921 ), #922, .F. )
#344 = ADVANCED_FACE( '', ( #923 ), #924, .F. )
#345 = ADVANCED_FACE( '', ( #925 ), #926, .F. )
#346 = ADVANCED_FACE( '', ( #927 ), #928, .T. )
#347 = ADVANCED_FACE( '', ( #929 ), #930, .F. )
#348 = ADVANCED_FACE( '', ( #931 ), #932, .F. )
#349 = ADVANCED_FACE( '', ( #933 ), #934, .T. )
#350 = ADVANCED_FACE( '', ( #935 ), #936, .T. )
#351 = ADVANCED_FACE( '', ( #937 ), #938, .T. )
#352 = ADVANCED_FACE( '', ( #939 ), #940, .T. )
#353 = ADVANCED_FACE( '', ( #941 ), #942, .F. )
#354 = ADVANCED_FACE( '', ( #943 ), #944, .F. )
#355 = ADVANCED_FACE( '', ( #945 ), #946, .F. )
#356 = ADVANCED_FACE( '', ( #947 ), #948, .F. )
#357 = ADVANCED_FACE( '', ( #949 ), #950, .T. )
#358 = ADVANCED_FACE( '', ( #951 ), #952, .F. )
#359 = ADVANCED_FACE( '', ( #953 ), #954, .F. )
#360 = ADVANCED_FACE( '', ( #955 ), #956, .F. )
#361 = ADVANCED_FACE( '', ( #957 ), #958, .T. )
#362 = ADVANCED_FACE( '', ( #959 ), #960, .T. )
#363 = ADVANCED_FACE( '', ( #961 ), #962, .T. )
#364 = ADVANCED_FACE( '', ( #963 ), #964, .F. )
#365 = ADVANCED_FACE( '', ( #965 ), #966, .T. )
#366 = ADVANCED_FACE( '', ( #967 ), #968, .T. )
#367 = ADVANCED_FACE( '', ( #969 ), #970, .F. )
#368 = ADVANCED_FACE( '', ( #971 ), #972, .F. )
#369 = ADVANCED_FACE( '', ( #973 ), #974, .F. )
#370 = ADVANCED_FACE( '', ( #975 ), #976, .T. )
#371 = ADVANCED_FACE( '', ( #977 ), #978, .T. )
#372 = ADVANCED_FACE( '', ( #979 ), #980, .T. )
#373 = ADVANCED_FACE( '', ( #981 ), #982, .T. )
#374 = ADVANCED_FACE( '', ( #983 ), #984, .T. )
#375 = ADVANCED_FACE( '', ( #985 ), #986, .F. )
#376 = ADVANCED_FACE( '', ( #987 ), #988, .T. )
#378 = FACE_OUTER_BOUND( '', #989, .T. )
#379 = FACE_BOUND( '', #990, .T. )
#380 = FACE_BOUND( '', #991, .T. )
#381 = PLANE( '', #992 )
#382 = FACE_OUTER_BOUND( '', #993, .T. )
#383 = PLANE( '', #994 )
#384 = FACE_OUTER_BOUND( '', #995, .T. )
#385 = PLANE( '', #996 )
#386 = FACE_OUTER_BOUND( '', #997, .T. )
#387 = PLANE( '', #998 )
#388 = FACE_OUTER_BOUND( '', #999, .T. )
#389 = CYLINDRICAL_SURFACE( '', #1000, 3.00000000000000 )
#390 = FACE_OUTER_BOUND( '', #1001, .T. )
#391 = CYLINDRICAL_SURFACE( '', #1002, 3.00000000000000 )
#392 = FACE_OUTER_BOUND( '', #1003, .T. )
#393 = PLANE( '', #1004 )
#394 = FACE_OUTER_BOUND( '', #1005, .T. )
#395 = PLANE( '', #1006 )
#396 = FACE_OUTER_BOUND( '', #1007, .T. )
#397 = FACE_OUTER_BOUND( '', #1008, .T. )
#398 = CYLINDRICAL_SURFACE( '', #1009, 0.500000000000000 )
#399 = FACE_OUTER_BOUND( '', #1010, .T. )
#400 = PLANE( '', #1011 )
#401 = FACE_OUTER_BOUND( '', #1012, .T. )
#402 = CYLINDRICAL_SURFACE( '', #1013, 0.236724813376669 )
#403 = FACE_OUTER_BOUND( '', #1014, .T. )
#404 = PLANE( '', #1015 )
#405 = FACE_OUTER_BOUND( '', #1016, .T. )
#406 = PLANE( '', #1017 )
#407 = FACE_OUTER_BOUND( '', #1018, .T. )
#408 = PLANE( '', #1019 )
#409 = FACE_OUTER_BOUND( '', #1020, .T. )
#410 = CYLINDRICAL_SURFACE( '', #1021, 0.500000000000000 )
#411 = FACE_OUTER_BOUND( '', #1022, .T. )
#412 = PLANE( '', #1023 )
#413 = FACE_OUTER_BOUND( '', #1024, .T. )
#414 = CYLINDRICAL_SURFACE( '', #1025, 1.75000000000000 )
#415 = FACE_OUTER_BOUND( '', #1026, .T. )
#416 = PLANE( '', #1027 )
#417 = FACE_OUTER_BOUND( '', #1028, .T. )
#418 = CYLINDRICAL_SURFACE( '', #1029, 2.00000000000000 )
#419 = FACE_OUTER_BOUND( '', #1030, .T. )
#420 = PLANE( '', #1031 )
#421 = FACE_OUTER_BOUND( '', #1032, .T. )
#422 = CYLINDRICAL_SURFACE( '', #1033, 1.75000000000000 )
#423 = FACE_OUTER_BOUND( '', #1034, .T. )
#424 = PLANE( '', #1035 )
#425 = FACE_OUTER_BOUND( '', #1036, .T. )
#426 = CYLINDRICAL_SURFACE( '', #1037, 2.00000000000000 )
#427 = FACE_OUTER_BOUND( '', #1038, .T. )
#428 = PLANE( '', #1039 )
#429 = FACE_OUTER_BOUND( '', #1040, .T. )
#430 = CYLINDRICAL_SURFACE( '', #1041, 1.75000000000000 )
#431 = FACE_OUTER_BOUND( '', #1042, .T. )
#432 = PLANE( '', #1043 )
#433 = FACE_OUTER_BOUND( '', #1044, .T. )
#434 = CYLINDRICAL_SURFACE( '', #1045, 2.00000000000000 )
#435 = FACE_OUTER_BOUND( '', #1046, .T. )
#436 = PLANE( '', #1047 )
#437 = FACE_OUTER_BOUND( '', #1048, .T. )
#438 = CYLINDRICAL_SURFACE( '', #1049, 1.75000000000000 )
#439 = FACE_OUTER_BOUND( '', #1050, .T. )
#440 = PLANE( '', #1051 )
#441 = FACE_OUTER_BOUND( '', #1052, .T. )
#442 = CYLINDRICAL_SURFACE( '', #1053, 2.00000000000000 )
#443 = FACE_OUTER_BOUND( '', #1054, .T. )
#444 = PLANE( '', #1055 )
#445 = FACE_OUTER_BOUND( '', #1056, .T. )
#446 = CYLINDRICAL_SURFACE( '', #1057, 1.75000000000000 )
#447 = FACE_OUTER_BOUND( '', #1058, .T. )
#448 = PLANE( '', #1059 )
#449 = FACE_OUTER_BOUND( '', #1060, .T. )
#450 = CYLINDRICAL_SURFACE( '', #1061, 2.00000000000000 )
#451 = FACE_OUTER_BOUND( '', #1062, .T. )
#452 = PLANE( '', #1063 )
#453 = FACE_OUTER_BOUND( '', #1064, .T. )
#454 = CYLINDRICAL_SURFACE( '', #1065, 1.75000000000000 )
#455 = FACE_OUTER_BOUND( '', #1066, .T. )
#456 = PLANE( '', #1067 )
#457 = FACE_OUTER_BOUND( '', #1068, .T. )
#458 = CYLINDRICAL_SURFACE( '', #1069, 2.00000000000000 )
#459 = FACE_OUTER_BOUND( '', #1070, .T. )
#460 = PLANE( '', #1071 )
#461 = FACE_OUTER_BOUND( '', #1072, .T. )
#462 = CYLINDRICAL_SURFACE( '', #1073, 1.75000000000000 )
#463 = FACE_OUTER_BOUND( '', #1074, .T. )
#464 = PLANE( '', #1075 )
#465 = FACE_OUTER_BOUND( '', #1076, .T. )
#466 = CYLINDRICAL_SURFACE( '', #1077, 2.00000000000000 )
#467 = FACE_OUTER_BOUND( '', #1078, .T. )
#468 = PLANE( '', #1079 )
#469 = FACE_OUTER_BOUND( '', #1080, .T. )
#470 = CYLINDRICAL_SURFACE( '', #1081, 1.75000000000000 )
#471 = FACE_OUTER_BOUND( '', #1082, .T. )
#472 = PLANE( '', #1083 )
#473 = FACE_OUTER_BOUND( '', #1084, .T. )
#474 = CYLINDRICAL_SURFACE( '', #1085, 2.00000000000000 )
#475 = FACE_OUTER_BOUND( '', #1086, .T. )
#476 = PLANE( '', #1087 )
#477 = FACE_OUTER_BOUND( '', #1088, .T. )
#478 = CYLINDRICAL_SURFACE( '', #1089, 1.75000000000000 )
#479 = FACE_OUTER_BOUND( '', #1090, .T. )
#480 = PLANE( '', #1091 )
#481 = FACE_OUTER_BOUND( '', #1092, .T. )
#482 = CYLINDRICAL_SURFACE( '', #1093, 2.00000000000000 )
#483 = FACE_OUTER_BOUND( '', #1094, .T. )
#484 = PLANE( '', #1095 )
#485 = FACE_OUTER_BOUND( '', #1096, .T. )
#486 = CYLINDRICAL_SURFACE( '', #1097, 1.75000000000000 )
#487 = FACE_OUTER_BOUND( '', #1098, .T. )
#488 = PLANE( '', #1099 )
#489 = FACE_OUTER_BOUND( '', #1100, .T. )
#490 = CYLINDRICAL_SURFACE( '', #1101, 2.00000000000000 )
#491 = FACE_OUTER_BOUND( '', #1102, .T. )
#492 = PLANE( '', #1103 )
#493 = FACE_OUTER_BOUND( '', #1104, .T. )
#494 = CYLINDRICAL_SURFACE( '', #1105, 1.75000000000000 )
#495 = FACE_OUTER_BOUND( '', #1106, .T. )
#496 = PLANE( '', #1107 )
#497 = FACE_OUTER_BOUND( '', #1108, .T. )
#498 = CYLINDRICAL_SURFACE( '', #1109, 2.00000000000000 )
#499 = FACE_OUTER_BOUND( '', #1110, .T. )
#500 = PLANE( '', #1111 )
#501 = FACE_OUTER_BOUND( '', #1112, .T. )
#502 = CYLINDRICAL_SURFACE( '', #1113, 0.500000000000000 )
#503 = FACE_OUTER_BOUND( '', #1114, .T. )
#504 = PLANE( '', #1115 )
#505 = FACE_OUTER_BOUND( '', #1116, .T. )
#506 = PLANE( '', #1117 )
#507 = FACE_OUTER_BOUND( '', #1118, .T. )
#508 = PLANE( '', #1119 )
#509 = FACE_OUTER_BOUND( '', #1120, .T. )
#510 = CYLINDRICAL_SURFACE( '', #1121, 5.00000042890090 )
#511 = FACE_OUTER_BOUND( '', #1122, .T. )
#512 = PLANE( '', #1123 )
#513 = FACE_OUTER_BOUND( '', #1124, .T. )
#514 = CYLINDRICAL_SURFACE( '', #1125, 2.60000000000000 )
#515 = FACE_OUTER_BOUND( '', #1126, .T. )
#516 = PLANE( '', #1127 )
#517 = FACE_OUTER_BOUND( '', #1128, .T. )
#518 = CYLINDRICAL_SURFACE( '', #1129, 1.90008223684211 )
#519 = FACE_OUTER_BOUND( '', #1130, .T. )
#520 = CYLINDRICAL_SURFACE( '', #1131, 0.775000000000000 )
#521 = FACE_OUTER_BOUND( '', #1132, .T. )
#522 = PLANE( '', #1133 )
#523 = FACE_OUTER_BOUND( '', #1134, .T. )
#524 = CYLINDRICAL_SURFACE( '', #1135, 1.47500000000000 )
#525 = FACE_OUTER_BOUND( '', #1136, .T. )
#526 = PLANE( '', #1137 )
#527 = FACE_OUTER_BOUND( '', #1138, .T. )
#528 = CYLINDRICAL_SURFACE( '', #1139, 0.500000000000000 )
#529 = FACE_OUTER_BOUND( '', #1140, .T. )
#530 = PLANE( '', #1141 )
#531 = FACE_OUTER_BOUND( '', #1142, .T. )
#532 = CYLINDRICAL_SURFACE( '', #1143, 0.775000000000000 )
#533 = FACE_OUTER_BOUND( '', #1144, .T. )
#534 = CYLINDRICAL_SURFACE( '', #1145, 1.47500000000000 )
#535 = FACE_OUTER_BOUND( '', #1146, .T. )
#536 = PLANE( '', #1147 )
#537 = FACE_OUTER_BOUND( '', #1148, .T. )
#538 = CYLINDRICAL_SURFACE( '', #1149, 2.60006009615386 )
#539 = FACE_OUTER_BOUND( '', #1150, .T. )
#540 = PLANE( '', #1151 )
#541 = FACE_OUTER_BOUND( '', #1152, .T. )
#542 = CYLINDRICAL_SURFACE( '', #1153, 1.90000000000000 )
#543 = FACE_OUTER_BOUND( '', #1154, .T. )
#544 = CYLINDRICAL_SURFACE( '', #1155, 5.70000037624799 )
#545 = FACE_OUTER_BOUND( '', #1156, .T. )
#546 = PLANE( '', #1157 )
#547 = FACE_OUTER_BOUND( '', #1158, .T. )
#548 = PLANE( '', #1159 )
#549 = FACE_OUTER_BOUND( '', #1160, .T. )
#550 = CYLINDRICAL_SURFACE( '', #1161, 5.70000000000000 )
#551 = FACE_OUTER_BOUND( '', #1162, .T. )
#552 = PLANE( '', #1163 )
#553 = FACE_OUTER_BOUND( '', #1164, .T. )
#554 = CYLINDRICAL_SURFACE( '', #1165, 0.500000000000000 )
#555 = FACE_OUTER_BOUND( '', #1166, .T. )
#556 = PLANE( '', #1167 )
#557 = FACE_OUTER_BOUND( '', #1168, .T. )
#558 = CYLINDRICAL_SURFACE( '', #1169, 5.00000000000000 )
#559 = FACE_OUTER_BOUND( '', #1170, .T. )
#560 = PLANE( '', #1171 )
#561 = FACE_OUTER_BOUND( '', #1172, .T. )
#562 = PLANE( '', #1173 )
#563 = FACE_OUTER_BOUND( '', #1174, .T. )
#564 = CYLINDRICAL_SURFACE( '', #1175, 0.500000000000000 )
#565 = FACE_OUTER_BOUND( '', #1176, .T. )
#566 = PLANE( '', #1177 )
#567 = FACE_OUTER_BOUND( '', #1178, .T. )
#568 = CYLINDRICAL_SURFACE( '', #1179, 1.75000000000000 )
#569 = FACE_OUTER_BOUND( '', #1180, .T. )
#570 = PLANE( '', #1181 )
#571 = FACE_OUTER_BOUND( '', #1182, .T. )
#572 = CYLINDRICAL_SURFACE( '', #1183, 2.00000000000000 )
#573 = FACE_OUTER_BOUND( '', #1184, .T. )
#574 = PLANE( '', #1185 )
#575 = FACE_OUTER_BOUND( '', #1186, .T. )
#576 = CYLINDRICAL_SURFACE( '', #1187, 1.75000000000000 )
#577 = FACE_OUTER_BOUND( '', #1188, .T. )
#578 = PLANE( '', #1189 )
#579 = FACE_OUTER_BOUND( '', #1190, .T. )
#580 = CYLINDRICAL_SURFACE( '', #1191, 2.00000000000000 )
#581 = FACE_OUTER_BOUND( '', #1192, .T. )
#582 = PLANE( '', #1193 )
#583 = FACE_OUTER_BOUND( '', #1194, .T. )
#584 = CYLINDRICAL_SURFACE( '', #1195, 1.75000000000000 )
#585 = FACE_OUTER_BOUND( '', #1196, .T. )
#586 = PLANE( '', #1197 )
#587 = FACE_OUTER_BOUND( '', #1198, .T. )
#588 = CYLINDRICAL_SURFACE( '', #1199, 2.00000000000000 )
#589 = FACE_OUTER_BOUND( '', #1200, .T. )
#590 = PLANE( '', #1201 )
#591 = FACE_OUTER_BOUND( '', #1202, .T. )
#592 = CYLINDRICAL_SURFACE( '', #1203, 1.75000000000000 )
#593 = FACE_OUTER_BOUND( '', #1204, .T. )
#594 = PLANE( '', #1205 )
#595 = FACE_OUTER_BOUND( '', #1206, .T. )
#596 = CYLINDRICAL_SURFACE( '', #1207, 2.00000000000000 )
#597 = FACE_OUTER_BOUND( '', #1208, .T. )
#598 = PLANE( '', #1209 )
#599 = FACE_OUTER_BOUND( '', #1210, .T. )
#600 = CYLINDRICAL_SURFACE( '', #1211, 1.75000000000000 )
#601 = FACE_OUTER_BOUND( '', #1212, .T. )
#602 = PLANE( '', #1213 )
#603 = FACE_OUTER_BOUND( '', #1214, .T. )
#604 = CYLINDRICAL_SURFACE( '', #1215, 2.00000000000000 )
#605 = FACE_OUTER_BOUND( '', #1216, .T. )
#606 = PLANE( '', #1217 )
#607 = FACE_OUTER_BOUND( '', #1218, .T. )
#608 = CYLINDRICAL_SURFACE( '', #1219, 1.75000000000000 )
#609 = FACE_OUTER_BOUND( '', #1220, .T. )
#610 = PLANE( '', #1221 )
#611 = FACE_OUTER_BOUND( '', #1222, .T. )
#612 = CYLINDRICAL_SURFACE( '', #1223, 2.00000000000000 )
#613 = FACE_OUTER_BOUND( '', #1224, .T. )
#614 = PLANE( '', #1225 )
#615 = FACE_OUTER_BOUND( '', #1226, .T. )
#616 = CYLINDRICAL_SURFACE( '', #1227, 1.75000000000000 )
#617 = FACE_OUTER_BOUND( '', #1228, .T. )
#618 = PLANE( '', #1229 )
#619 = FACE_OUTER_BOUND( '', #1230, .T. )
#620 = CYLINDRICAL_SURFACE( '', #1231, 2.00000000000000 )
#621 = FACE_OUTER_BOUND( '', #1232, .T. )
#622 = PLANE( '', #1233 )
#623 = FACE_OUTER_BOUND( '', #1234, .T. )
#624 = CYLINDRICAL_SURFACE( '', #1235, 1.75000000000000 )
#625 = FACE_OUTER_BOUND( '', #1236, .T. )
#626 = PLANE( '', #1237 )
#627 = FACE_OUTER_BOUND( '', #1238, .T. )
#628 = CYLINDRICAL_SURFACE( '', #1239, 2.00000000000000 )
#629 = FACE_OUTER_BOUND( '', #1240, .T. )
#630 = PLANE( '', #1241 )
#631 = FACE_OUTER_BOUND( '', #1242, .T. )
#632 = CYLINDRICAL_SURFACE( '', #1243, 1.75000000000000 )
#633 = FACE_OUTER_BOUND( '', #1244, .T. )
#634 = PLANE( '', #1245 )
#635 = FACE_OUTER_BOUND( '', #1246, .T. )
#636 = CYLINDRICAL_SURFACE( '', #1247, 2.00000000000000 )
#637 = FACE_OUTER_BOUND( '', #1248, .T. )
#638 = PLANE( '', #1249 )
#639 = FACE_OUTER_BOUND( '', #1250, .T. )
#640 = CYLINDRICAL_SURFACE( '', #1251, 1.75000000000000 )
#641 = FACE_OUTER_BOUND( '', #1252, .T. )
#642 = PLANE( '', #1253 )
#643 = FACE_OUTER_BOUND( '', #1254, .T. )
#644 = CYLINDRICAL_SURFACE( '', #1255, 2.00000000000000 )
#645 = FACE_OUTER_BOUND( '', #1256, .T. )
#646 = PLANE( '', #1257 )
#647 = FACE_OUTER_BOUND( '', #1258, .T. )
#648 = CYLINDRICAL_SURFACE( '', #1259, 1.75000000000000 )
#649 = FACE_OUTER_BOUND( '', #1260, .T. )
#650 = FACE_OUTER_BOUND( '', #1261, .T. )
#651 = CYLINDRICAL_SURFACE( '', #1262, 0.500000000000000 )
#652 = FACE_OUTER_BOUND( '', #1263, .T. )
#653 = PLANE( '', #1264 )
#654 = FACE_OUTER_BOUND( '', #1265, .T. )
#655 = CYLINDRICAL_SURFACE( '', #1266, 1.75000000000000 )
#656 = FACE_OUTER_BOUND( '', #1267, .T. )
#657 = PLANE( '', #1268 )
#658 = FACE_OUTER_BOUND( '', #1269, .T. )
#659 = PLANE( '', #1270 )
#660 = FACE_OUTER_BOUND( '', #1271, .T. )
#661 = PLANE( '', #1272 )
#662 = FACE_OUTER_BOUND( '', #1273, .T. )
#663 = CYLINDRICAL_SURFACE( '', #1274, 2.00000000000000 )
#664 = FACE_OUTER_BOUND( '', #1275, .T. )
#665 = CYLINDRICAL_SURFACE( '', #1276, 0.250000000000000 )
#666 = FACE_OUTER_BOUND( '', #1277, .T. )
#667 = PLANE( '', #1278 )
#668 = FACE_OUTER_BOUND( '', #1279, .T. )
#669 = CYLINDRICAL_SURFACE( '', #1280, 0.500000000000000 )
#670 = FACE_OUTER_BOUND( '', #1281, .T. )
#671 = PLANE( '', #1282 )
#672 = FACE_OUTER_BOUND( '', #1283, .T. )
#673 = PLANE( '', #1284 )
#674 = FACE_OUTER_BOUND( '', #1285, .T. )
#675 = CYLINDRICAL_SURFACE( '', #1286, 0.500000000000000 )
#676 = FACE_OUTER_BOUND( '', #1287, .T. )
#677 = PLANE( '', #1288 )
#678 = FACE_OUTER_BOUND( '', #1289, .T. )
#679 = CYLINDRICAL_SURFACE( '', #1290, 3.00000000000000 )
#680 = FACE_OUTER_BOUND( '', #1291, .T. )
#681 = CYLINDRICAL_SURFACE( '', #1292, 1.75000000000000 )
#682 = FACE_OUTER_BOUND( '', #1293, .T. )
#683 = CYLINDRICAL_SURFACE( '', #1294, 1.75000000000000 )
#684 = FACE_OUTER_BOUND( '', #1295, .T. )
#685 = PLANE( '', #1296 )
#686 = FACE_OUTER_BOUND( '', #1297, .T. )
#687 = PLANE( '', #1298 )
#688 = FACE_OUTER_BOUND( '', #1299, .T. )
#689 = CYLINDRICAL_SURFACE( '', #1300, 0.500000000000000 )
#690 = FACE_OUTER_BOUND( '', #1301, .T. )
#691 = PLANE( '', #1302 )
#692 = FACE_OUTER_BOUND( '', #1303, .T. )
#693 = CYLINDRICAL_SURFACE( '', #1304, 2.00000000000000 )
#694 = FACE_OUTER_BOUND( '', #1305, .T. )
#695 = PLANE( '', #1306 )
#696 = FACE_OUTER_BOUND( '', #1307, .T. )
#697 = PLANE( '', #1308 )
#698 = FACE_OUTER_BOUND( '', #1309, .T. )
#699 = CYLINDRICAL_SURFACE( '', #1310, 2.00000000000000 )
#700 = FACE_OUTER_BOUND( '', #1311, .T. )
#701 = PLANE( '', #1312 )
#702 = FACE_OUTER_BOUND( '', #1313, .T. )
#703 = PLANE( '', #1314 )
#704 = FACE_OUTER_BOUND( '', #1315, .T. )
#705 = CYLINDRICAL_SURFACE( '', #1316, 0.250000000000000 )
#706 = FACE_OUTER_BOUND( '', #1317, .T. )
#707 = PLANE( '', #1318 )
#708 = FACE_OUTER_BOUND( '', #1319, .T. )
#709 = PLANE( '', #1320 )
#710 = FACE_OUTER_BOUND( '', #1321, .T. )
#711 = PLANE( '', #1322 )
#712 = FACE_OUTER_BOUND( '', #1323, .T. )
#713 = CYLINDRICAL_SURFACE( '', #1324, 2.00000000000000 )
#714 = FACE_OUTER_BOUND( '', #1325, .T. )
#715 = CYLINDRICAL_SURFACE( '', #1326, 5.00000000000000 )
#716 = FACE_OUTER_BOUND( '', #1327, .T. )
#717 = CYLINDRICAL_SURFACE( '', #1328, 5.00000000000000 )
#718 = FACE_OUTER_BOUND( '', #1329, .T. )
#719 = PLANE( '', #1330 )
#720 = FACE_OUTER_BOUND( '', #1331, .T. )
#721 = PLANE( '', #1332 )
#722 = FACE_OUTER_BOUND( '', #1333, .T. )
#723 = CYLINDRICAL_SURFACE( '', #1334, 1.75000000000000 )
#724 = FACE_OUTER_BOUND( '', #1335, .T. )
#725 = PLANE( '', #1336 )
#726 = FACE_OUTER_BOUND( '', #1337, .T. )
#727 = PLANE( '', #1338 )
#728 = FACE_OUTER_BOUND( '', #1339, .T. )
#729 = CYLINDRICAL_SURFACE( '', #1340, 5.25000000000000 )
#730 = FACE_OUTER_BOUND( '', #1341, .T. )
#731 = PLANE( '', #1342 )
#732 = FACE_OUTER_BOUND( '', #1343, .T. )
#733 = PLANE( '', #1344 )
#734 = FACE_OUTER_BOUND( '', #1345, .T. )
#735 = CYLINDRICAL_SURFACE( '', #1346, 1.75000000000000 )
#736 = FACE_OUTER_BOUND( '', #1347, .T. )
#737 = FACE_OUTER_BOUND( '', #1348, .T. )
#738 = CYLINDRICAL_SURFACE( '', #1349, 0.500000000000000 )
#739 = FACE_OUTER_BOUND( '', #1350, .T. )
#740 = CYLINDRICAL_SURFACE( '', #1351, 2.00000000000000 )
#741 = FACE_OUTER_BOUND( '', #1352, .T. )
#742 = CYLINDRICAL_SURFACE( '', #1353, 1.75000000000000 )
#743 = FACE_OUTER_BOUND( '', #1354, .T. )
#744 = CYLINDRICAL_SURFACE( '', #1355, 2.00000000000000 )
#745 = FACE_OUTER_BOUND( '', #1356, .T. )
#746 = CYLINDRICAL_SURFACE( '', #1357, 1.75000000000000 )
#747 = FACE_OUTER_BOUND( '', #1358, .T. )
#748 = PLANE( '', #1359 )
#749 = FACE_OUTER_BOUND( '', #1360, .T. )
#750 = PLANE( '', #1361 )
#751 = FACE_OUTER_BOUND( '', #1362, .T. )
#752 = PLANE( '', #1363 )
#753 = FACE_OUTER_BOUND( '', #1364, .T. )
#754 = PLANE( '', #1365 )
#755 = FACE_OUTER_BOUND( '', #1366, .T. )
#756 = PLANE( '', #1367 )
#757 = FACE_OUTER_BOUND( '', #1368, .T. )
#758 = PLANE( '', #1369 )
#759 = FACE_OUTER_BOUND( '', #1370, .T. )
#760 = CYLINDRICAL_SURFACE( '', #1371, 2.00000000000000 )
#761 = FACE_OUTER_BOUND( '', #1372, .T. )
#762 = PLANE( '', #1373 )
#763 = FACE_OUTER_BOUND( '', #1374, .T. )
#764 = CYLINDRICAL_SURFACE( '', #1375, 1.75000000000000 )
#765 = FACE_OUTER_BOUND( '', #1376, .T. )
#766 = PLANE( '', #1377 )
#767 = FACE_OUTER_BOUND( '', #1378, .T. )
#768 = PLANE( '', #1379 )
#769 = FACE_OUTER_BOUND( '', #1380, .T. )
#770 = PLANE( '', #1381 )
#771 = FACE_OUTER_BOUND( '', #1382, .T. )
#772 = CYLINDRICAL_SURFACE( '', #1383, 1.75000000000000 )
#773 = FACE_OUTER_BOUND( '', #1384, .T. )
#774 = PLANE( '', #1385 )
#775 = FACE_OUTER_BOUND( '', #1386, .T. )
#776 = PLANE( '', #1387 )
#777 = FACE_OUTER_BOUND( '', #1388, .T. )
#778 = PLANE( '', #1389 )
#779 = FACE_OUTER_BOUND( '', #1390, .T. )
#780 = PLANE( '', #1391 )
#781 = FACE_OUTER_BOUND( '', #1392, .T. )
#782 = CYLINDRICAL_SURFACE( '', #1393, 2.00000000000000 )
#783 = FACE_OUTER_BOUND( '', #1394, .T. )
#784 = CYLINDRICAL_SURFACE( '', #1395, 1.75000000000000 )
#785 = FACE_OUTER_BOUND( '', #1396, .T. )
#786 = CYLINDRICAL_SURFACE( '', #1397, 2.00000000000000 )
#787 = FACE_OUTER_BOUND( '', #1398, .T. )
#788 = PLANE( '', #1399 )
#789 = FACE_OUTER_BOUND( '', #1400, .T. )
#790 = PLANE( '', #1401 )
#791 = FACE_OUTER_BOUND( '', #1402, .T. )
#792 = CYLINDRICAL_SURFACE( '', #1403, 2.00000000000000 )
#793 = FACE_OUTER_BOUND( '', #1404, .T. )
#794 = PLANE( '', #1405 )
#795 = FACE_OUTER_BOUND( '', #1406, .T. )
#796 = CYLINDRICAL_SURFACE( '', #1407, 1.75000000000000 )
#797 = FACE_OUTER_BOUND( '', #1408, .T. )
#798 = CYLINDRICAL_SURFACE( '', #1409, 2.00000000000000 )
#799 = FACE_OUTER_BOUND( '', #1410, .T. )
#800 = PLANE( '', #1411 )
#801 = FACE_OUTER_BOUND( '', #1412, .T. )
#802 = CYLINDRICAL_SURFACE( '', #1413, 1.90000000000000 )
#803 = FACE_OUTER_BOUND( '', #1414, .T. )
#804 = PLANE( '', #1415 )
#805 = FACE_OUTER_BOUND( '', #1416, .T. )
#806 = CYLINDRICAL_SURFACE( '', #1417, 0.225078593598007 )
#807 = FACE_OUTER_BOUND( '', #1418, .T. )
#808 = CYLINDRICAL_SURFACE( '', #1419, 1.47500000000000 )
#809 = FACE_OUTER_BOUND( '', #1420, .T. )
#810 = PLANE( '', #1421 )
#811 = FACE_OUTER_BOUND( '', #1422, .T. )
#812 = PLANE( '', #1423 )
#813 = FACE_OUTER_BOUND( '', #1424, .T. )
#814 = CYLINDRICAL_SURFACE( '', #1425, 1.75000000000000 )
#815 = FACE_OUTER_BOUND( '', #1426, .T. )
#816 = PLANE( '', #1427 )
#817 = FACE_OUTER_BOUND( '', #1428, .T. )
#818 = PLANE( '', #1429 )
#819 = FACE_OUTER_BOUND( '', #1430, .T. )
#820 = PLANE( '', #1431 )
#821 = FACE_OUTER_BOUND( '', #1432, .T. )
#822 = FACE_OUTER_BOUND( '', #1433, .T. )
#823 = CYLINDRICAL_SURFACE( '', #1434, 0.500000000000000 )
#824 = FACE_OUTER_BOUND( '', #1435, .T. )
#825 = PLANE( '', #1436 )
#826 = FACE_OUTER_BOUND( '', #1437, .T. )
#827 = CYLINDRICAL_SURFACE( '', #1438, 0.500000000000000 )
#828 = FACE_OUTER_BOUND( '', #1439, .T. )
#829 = CYLINDRICAL_SURFACE( '', #1440, 1.75000000000000 )
#830 = FACE_OUTER_BOUND( '', #1441, .T. )
#831 = CYLINDRICAL_SURFACE( '', #1442, 2.00000000000000 )
#832 = FACE_OUTER_BOUND( '', #1443, .T. )
#833 = PLANE( '', #1444 )
#834 = FACE_OUTER_BOUND( '', #1445, .T. )
#835 = PLANE( '', #1446 )
#836 = FACE_OUTER_BOUND( '', #1447, .T. )
#837 = CYLINDRICAL_SURFACE( '', #1448, 2.00000000000000 )
#838 = FACE_OUTER_BOUND( '', #1449, .T. )
#839 = PLANE( '', #1450 )
#840 = FACE_OUTER_BOUND( '', #1451, .T. )
#841 = FACE_OUTER_BOUND( '', #1452, .T. )
#842 = CYLINDRICAL_SURFACE( '', #1453, 0.500000000000000 )
#843 = FACE_OUTER_BOUND( '', #1454, .T. )
#844 = PLANE( '', #1455 )
#845 = FACE_OUTER_BOUND( '', #1456, .T. )
#846 = PLANE( '', #1457 )
#847 = FACE_OUTER_BOUND( '', #1458, .T. )
#848 = PLANE( '', #1459 )
#849 = FACE_OUTER_BOUND( '', #1460, .T. )
#850 = PLANE( '', #1461 )
#851 = FACE_OUTER_BOUND( '', #1462, .T. )
#852 = CYLINDRICAL_SURFACE( '', #1463, 2.00000000000000 )
#853 = FACE_OUTER_BOUND( '', #1464, .T. )
#854 = PLANE( '', #1465 )
#855 = FACE_OUTER_BOUND( '', #1466, .T. )
#856 = CYLINDRICAL_SURFACE( '', #1467, 1.90008223684212 )
#857 = FACE_OUTER_BOUND( '', #1468, .T. )
#858 = PLANE( '', #1469 )
#859 = FACE_OUTER_BOUND( '', #1470, .T. )
#860 = CYLINDRICAL_SURFACE( '', #1471, 1.75000000000000 )
#861 = FACE_OUTER_BOUND( '', #1472, .T. )
#862 = PLANE( '', #1473 )
#863 = FACE_OUTER_BOUND( '', #1474, .T. )
#864 = PLANE( '', #1475 )
#865 = FACE_OUTER_BOUND( '', #1476, .T. )
#866 = CYLINDRICAL_SURFACE( '', #1477, 1.75000000000000 )
#867 = FACE_OUTER_BOUND( '', #1478, .T. )
#868 = PLANE( '', #1479 )
#869 = FACE_OUTER_BOUND( '', #1480, .T. )
#870 = CYLINDRICAL_SURFACE( '', #1481, 1.75000000000000 )
#871 = FACE_OUTER_BOUND( '', #1482, .T. )
#872 = CYLINDRICAL_SURFACE( '', #1483, 1.75000000000000 )
#873 = FACE_OUTER_BOUND( '', #1484, .T. )
#874 = CYLINDRICAL_SURFACE( '', #1485, 2.00000000000000 )
#875 = FACE_OUTER_BOUND( '', #1486, .T. )
#876 = PLANE( '', #1487 )
#877 = FACE_OUTER_BOUND( '', #1488, .T. )
#878 = CYLINDRICAL_SURFACE( '', #1489, 5.25000000000000 )
#879 = FACE_OUTER_BOUND( '', #1490, .T. )
#880 = PLANE( '', #1491 )
#881 = FACE_OUTER_BOUND( '', #1492, .T. )
#882 = PLANE( '', #1493 )
#883 = FACE_OUTER_BOUND( '', #1494, .T. )
#884 = PLANE( '', #1495 )
#885 = FACE_OUTER_BOUND( '', #1496, .T. )
#886 = PLANE( '', #1497 )
#887 = FACE_OUTER_BOUND( '', #1498, .T. )
#888 = PLANE( '', #1499 )
#889 = FACE_OUTER_BOUND( '', #1500, .T. )
#890 = CYLINDRICAL_SURFACE( '', #1501, 1.75000000000000 )
#891 = FACE_OUTER_BOUND( '', #1502, .T. )
#892 = PLANE( '', #1503 )
#893 = FACE_OUTER_BOUND( '', #1504, .T. )
#894 = CYLINDRICAL_SURFACE( '', #1505, 2.60006009615387 )
#895 = FACE_OUTER_BOUND( '', #1506, .T. )
#896 = CYLINDRICAL_SURFACE( '', #1507, 2.00000000000000 )
#897 = FACE_OUTER_BOUND( '', #1508, .T. )
#898 = PLANE( '', #1509 )
#899 = FACE_OUTER_BOUND( '', #1510, .T. )
#900 = CYLINDRICAL_SURFACE( '', #1511, 0.775000000000000 )
#901 = FACE_OUTER_BOUND( '', #1512, .T. )
#902 = PLANE( '', #1513 )
#903 = FACE_OUTER_BOUND( '', #1514, .T. )
#904 = CYLINDRICAL_SURFACE( '', #1515, 1.47500000000000 )
#905 = FACE_OUTER_BOUND( '', #1516, .T. )
#906 = PLANE( '', #1517 )
#907 = FACE_OUTER_BOUND( '', #1518, .T. )
#908 = CYLINDRICAL_SURFACE( '', #1519, 2.60000000000000 )
#909 = FACE_OUTER_BOUND( '', #1520, .T. )
#910 = PLANE( '', #1521 )
#911 = FACE_OUTER_BOUND( '', #1522, .T. )
#912 = PLANE( '', #1523 )
#913 = FACE_OUTER_BOUND( '', #1524, .T. )
#914 = PLANE( '', #1525 )
#915 = FACE_OUTER_BOUND( '', #1526, .T. )
#916 = CYLINDRICAL_SURFACE( '', #1527, 0.775000000000000 )
#917 = FACE_OUTER_BOUND( '', #1528, .T. )
#918 = PLANE( '', #1529 )
#919 = FACE_OUTER_BOUND( '', #1530, .T. )
#920 = PLANE( '', #1531 )
#921 = FACE_OUTER_BOUND( '', #1532, .T. )
#922 = PLANE( '', #1533 )
#923 = FACE_OUTER_BOUND( '', #1534, .T. )
#924 = PLANE( '', #1535 )
#925 = FACE_OUTER_BOUND( '', #1536, .T. )
#926 = PLANE( '', #1537 )
#927 = FACE_OUTER_BOUND( '', #1538, .T. )
#928 = CYLINDRICAL_SURFACE( '', #1539, 2.00000000000000 )
#929 = FACE_OUTER_BOUND( '', #1540, .T. )
#930 = CYLINDRICAL_SURFACE( '', #1541, 1.75000000000000 )
#931 = FACE_OUTER_BOUND( '', #1542, .T. )
#932 = PLANE( '', #1543 )
#933 = FACE_OUTER_BOUND( '', #1544, .T. )
#934 = PLANE( '', #1545 )
#935 = FACE_OUTER_BOUND( '', #1546, .T. )
#936 = PLANE( '', #1547 )
#937 = FACE_OUTER_BOUND( '', #1548, .T. )
#938 = PLANE( '', #1549 )
#939 = FACE_OUTER_BOUND( '', #1550, .T. )
#940 = PLANE( '', #1551 )
#941 = FACE_OUTER_BOUND( '', #1552, .T. )
#942 = CYLINDRICAL_SURFACE( '', #1553, 1.75000000000000 )
#943 = FACE_OUTER_BOUND( '', #1554, .T. )
#944 = PLANE( '', #1555 )
#945 = FACE_OUTER_BOUND( '', #1556, .T. )
#946 = PLANE( '', #1557 )
#947 = FACE_OUTER_BOUND( '', #1558, .T. )
#948 = PLANE( '', #1559 )
#949 = FACE_OUTER_BOUND( '', #1560, .T. )
#950 = PLANE( '', #1561 )
#951 = FACE_OUTER_BOUND( '', #1562, .T. )
#952 = PLANE( '', #1563 )
#953 = FACE_OUTER_BOUND( '', #1564, .T. )
#954 = CYLINDRICAL_SURFACE( '', #1565, 1.75000000000000 )
#955 = FACE_OUTER_BOUND( '', #1566, .T. )
#956 = CYLINDRICAL_SURFACE( '', #1567, 0.500000000000000 )
#957 = FACE_OUTER_BOUND( '', #1568, .T. )
#958 = CYLINDRICAL_SURFACE( '', #1569, 2.00000000000000 )
#959 = FACE_OUTER_BOUND( '', #1570, .T. )
#960 = CYLINDRICAL_SURFACE( '', #1571, 0.500000000000000 )
#961 = FACE_OUTER_BOUND( '', #1572, .T. )
#962 = PLANE( '', #1573 )
#963 = FACE_OUTER_BOUND( '', #1574, .T. )
#964 = CYLINDRICAL_SURFACE( '', #1575, 1.75000000000000 )
#965 = FACE_OUTER_BOUND( '', #1576, .T. )
#966 = PLANE( '', #1577 )
#967 = FACE_OUTER_BOUND( '', #1578, .T. )
#968 = CYLINDRICAL_SURFACE( '', #1579, 2.00000000000000 )
#969 = FACE_OUTER_BOUND( '', #1580, .T. )
#970 = PLANE( '', #1581 )
#971 = FACE_OUTER_BOUND( '', #1582, .T. )
#972 = PLANE( '', #1583 )
#973 = FACE_OUTER_BOUND( '', #1584, .T. )
#974 = PLANE( '', #1585 )
#975 = FACE_OUTER_BOUND( '', #1586, .T. )
#976 = CYLINDRICAL_SURFACE( '', #1587, 2.00000000000000 )
#977 = FACE_OUTER_BOUND( '', #1588, .T. )
#978 = CYLINDRICAL_SURFACE( '', #1589, 2.00000000000000 )
#979 = FACE_OUTER_BOUND( '', #1590, .T. )
#980 = CYLINDRICAL_SURFACE( '', #1591, 2.00000000000000 )
#981 = FACE_OUTER_BOUND( '', #1592, .T. )
#982 = CYLINDRICAL_SURFACE( '', #1593, 2.00000000000000 )
#983 = FACE_OUTER_BOUND( '', #1594, .T. )
#984 = PLANE( '', #1595 )
#985 = FACE_OUTER_BOUND( '', #1596, .T. )
#986 = PLANE( '', #1597 )
#987 = FACE_OUTER_BOUND( '', #1598, .T. )
#988 = CYLINDRICAL_SURFACE( '', #1599, 3.00000000000000 )
#989 = EDGE_LOOP( '', ( #1600, #1601, #1602, #1603, #1604, #1605, #1606, #1607 ) )
#990 = EDGE_LOOP( '', ( #1608, #1609, #1610, #1611, #1612, #1613, #1614, #1615, #1616, #1617, #1618, #1619, #1620, #1621, #1622, #1623, #1624, #1625, #1626, #1627, #1628, #1629, #1630, #1631, #1632, #1633, #1634, #1635, #1636, #1637, #1638, #1639, #1640, #1641, #1642, #1643, #1644, #1645, #1646, #1647, #1648, #1649, #1650, #1651, #1652, #1653, #1654, #1655, #1656, #1657, #1658, #1659, #1660, #166…
#991 = EDGE_LOOP( '', ( #1745, #1746, #1747, #1748, #1749, #1750, #1751, #1752, #1753, #1754, #1755, #1756, #1757, #1758, #1759, #1760, #1761, #1762, #1763, #1764, #1765, #1766, #1767, #1768, #1769, #1770, #1771, #1772, #1773, #1774, #1775, #1776, #1777, #1778, #1779, #1780, #1781, #1782, #1783, #1784, #1785, #1786, #1787, #1788, #1789, #1790, #1791, #1792, #1793, #1794, #1795, #1796, #1797, #179…
#992 = AXIS2_PLACEMENT_3D( '', #1888, #1889, #1890 )
#993 = EDGE_LOOP( '', ( #1891, #1892, #1893, #1894 ) )
#994 = AXIS2_PLACEMENT_3D( '', #1895, #1896, #1897 )
#995 = EDGE_LOOP( '', ( #1898, #1899, #1900, #1901 ) )
#996 = AXIS2_PLACEMENT_3D( '', #1902, #1903, #1904 )
#997 = EDGE_LOOP( '', ( #1905, #1906, #1907, #1908, #1909, #1910, #1911, #1912 ) )
#998 = AXIS2_PLACEMENT_3D( '', #1913, #1914, #1915 )
#999 = EDGE_LOOP( '', ( #1916, #1917, #1918, #1919 ) )
#1000 = AXIS2_PLACEMENT_3D( '', #1920, #1921, #1922 )
#1001 = EDGE_LOOP( '', ( #1923, #1924, #1925, #1926 ) )
#1002 = AXIS2_PLACEMENT_3D( '', #1927, #1928, #1929 )
#1003 = EDGE_LOOP( '', ( #1930, #1931, #1932, #1933 ) )
#1004 = AXIS2_PLACEMENT_3D( '', #1934, #1935, #1936 )
#1005 = EDGE_LOOP( '', ( #1937, #1938, #1939, #1940 ) )
#1006 = AXIS2_PLACEMENT_3D( '', #1941, #1942, #1943 )
#1007 = EDGE_LOOP( '', ( #1944, #1945, #1946, #1947 ) )
#1008 = EDGE_LOOP( '', ( #1948 ) )
#1009 = AXIS2_PLACEMENT_3D( '', #1949, #1950, #1951 )
#1010 = EDGE_LOOP( '', ( #1952, #1953, #1954, #1955 ) )
#1011 = AXIS2_PLACEMENT_3D( '', #1956, #1957, #1958 )
#1012 = EDGE_LOOP( '', ( #1959, #1960, #1961, #1962 ) )
#1013 = AXIS2_PLACEMENT_3D( '', #1963, #1964, #1965 )
#1014 = EDGE_LOOP( '', ( #1966, #1967, #1968, #1969, #1970, #1971, #1972, #1973, #1974, #1975, #1976, #1977, #1978, #1979, #1980, #1981, #1982, #1983, #1984, #1985, #1986, #1987, #1988, #1989, #1990, #1991, #1992, #1993, #1994, #1995, #1996, #1997, #1998, #1999, #2000, #2001, #2002, #2003, #2004, #2005, #2006, #2007, #2008, #2009, #2010, #2011, #2012, #2013, #2014, #2015, #2016, #2017, #2018, #20…
#1015 = AXIS2_PLACEMENT_3D( '', #2077, #2078, #2079 )
#1016 = EDGE_LOOP( '', ( #2080, #2081, #2082, #2083 ) )
#1017 = AXIS2_PLACEMENT_3D( '', #2084, #2085, #2086 )
#1018 = EDGE_LOOP( '', ( #2087, #2088, #2089, #2090 ) )
#1019 = AXIS2_PLACEMENT_3D( '', #2091, #2092, #2093 )
#1020 = EDGE_LOOP( '', ( #2094, #2095, #2096, #2097 ) )
#1021 = AXIS2_PLACEMENT_3D( '', #2098, #2099, #2100 )
#1022 = EDGE_LOOP( '', ( #2101, #2102, #2103, #2104 ) )
#1023 = AXIS2_PLACEMENT_3D( '', #2105, #2106, #2107 )
#1024 = EDGE_LOOP( '', ( #2108, #2109, #2110, #2111 ) )
#1025 = AXIS2_PLACEMENT_3D( '', #2112, #2113, #2114 )
#1026 = EDGE_LOOP( '', ( #2115, #2116, #2117, #2118 ) )
#1027 = AXIS2_PLACEMENT_3D( '', #2119, #2120, #2121 )
#1028 = EDGE_LOOP( '', ( #2122, #2123, #2124, #2125 ) )
#1029 = AXIS2_PLACEMENT_3D( '', #2126, #2127, #2128 )
#1030 = EDGE_LOOP( '', ( #2129, #2130, #2131, #2132 ) )
#1031 = AXIS2_PLACEMENT_3D( '', #2133, #2134, #2135 )
#1032 = EDGE_LOOP( '', ( #2136, #2137, #2138, #2139 ) )
#1033 = AXIS2_PLACEMENT_3D( '', #2140, #2141, #2142 )
#1034 = EDGE_LOOP( '', ( #2143, #2144, #2145, #2146 ) )
#1035 = AXIS2_PLACEMENT_3D( '', #2147, #2148, #2149 )
#1036 = EDGE_LOOP( '', ( #2150, #2151, #2152, #2153 ) )
#1037 = AXIS2_PLACEMENT_3D( '', #2154, #2155, #2156 )
#1038 = EDGE_LOOP( '', ( #2157, #2158, #2159, #2160 ) )
#1039 = AXIS2_PLACEMENT_3D( '', #2161, #2162, #2163 )
#1040 = EDGE_LOOP( '', ( #2164, #2165, #2166, #2167 ) )
#1041 = AXIS2_PLACEMENT_3D( '', #2168, #2169, #2170 )
#1042 = EDGE_LOOP( '', ( #2171, #2172, #2173, #2174 ) )
#1043 = AXIS2_PLACEMENT_3D( '', #2175, #2176, #2177 )
#1044 = EDGE_LOOP( '', ( #2178, #2179, #2180, #2181 ) )
#1045 = AXIS2_PLACEMENT_3D( '', #2182, #2183, #2184 )
#1046 = EDGE_LOOP( '', ( #2185, #2186, #2187, #2188 ) )
#1047 = AXIS2_PLACEMENT_3D( '', #2189, #2190, #2191 )
#1048 = EDGE_LOOP( '', ( #2192, #2193, #2194, #2195 ) )
#1049 = AXIS2_PLACEMENT_3D( '', #2196, #2197, #2198 )
#1050 = EDGE_LOOP( '', ( #2199, #2200, #2201, #2202 ) )
#1051 = AXIS2_PLACEMENT_3D( '', #2203, #2204, #2205 )
#1052 = EDGE_LOOP( '', ( #2206, #2207, #2208, #2209 ) )
#1053 = AXIS2_PLACEMENT_3D( '', #2210, #2211, #2212 )
#1054 = EDGE_LOOP( '', ( #2213, #2214, #2215, #2216 ) )
#1055 = AXIS2_PLACEMENT_3D( '', #2217, #2218, #2219 )
#1056 = EDGE_LOOP( '', ( #2220, #2221, #2222, #2223 ) )
#1057 = AXIS2_PLACEMENT_3D( '', #2224, #2225, #2226 )
#1058 = EDGE_LOOP( '', ( #2227, #2228, #2229, #2230 ) )
#1059 = AXIS2_PLACEMENT_3D( '', #2231, #2232, #2233 )
#1060 = EDGE_LOOP( '', ( #2234, #2235, #2236, #2237 ) )
#1061 = AXIS2_PLACEMENT_3D( '', #2238, #2239, #2240 )
#1062 = EDGE_LOOP( '', ( #2241, #2242, #2243, #2244 ) )
#1063 = AXIS2_PLACEMENT_3D( '', #2245, #2246, #2247 )
#1064 = EDGE_LOOP( '', ( #2248, #2249, #2250, #2251 ) )
#1065 = AXIS2_PLACEMENT_3D( '', #2252, #2253, #2254 )
#1066 = EDGE_LOOP( '', ( #2255, #2256, #2257, #2258 ) )
#1067 = AXIS2_PLACEMENT_3D( '', #2259, #2260, #2261 )
#1068 = EDGE_LOOP( '', ( #2262, #2263, #2264, #2265 ) )
#1069 = AXIS2_PLACEMENT_3D( '', #2266, #2267, #2268 )
#1070 = EDGE_LOOP( '', ( #2269, #2270, #2271, #2272 ) )
#1071 = AXIS2_PLACEMENT_3D( '', #2273, #2274, #2275 )
#1072 = EDGE_LOOP( '', ( #2276, #2277, #2278, #2279 ) )
#1073 = AXIS2_PLACEMENT_3D( '', #2280, #2281, #2282 )
#1074 = EDGE_LOOP( '', ( #2283, #2284, #2285, #2286 ) )
#1075 = AXIS2_PLACEMENT_3D( '', #2287, #2288, #2289 )
#1076 = EDGE_LOOP( '', ( #2290, #2291, #2292, #2293 ) )
#1077 = AXIS2_PLACEMENT_3D( '', #2294, #2295, #2296 )
#1078 = EDGE_LOOP( '', ( #2297, #2298, #2299, #2300 ) )
#1079 = AXIS2_PLACEMENT_3D( '', #2301, #2302, #2303 )
#1080 = EDGE_LOOP( '', ( #2304, #2305, #2306, #2307 ) )
#1081 = AXIS2_PLACEMENT_3D( '', #2308, #2309, #2310 )
#1082 = EDGE_LOOP( '', ( #2311, #2312, #2313, #2314 ) )
#1083 = AXIS2_PLACEMENT_3D( '', #2315, #2316, #2317 )
#1084 = EDGE_LOOP( '', ( #2318, #2319, #2320, #2321 ) )
#1085 = AXIS2_PLACEMENT_3D( '', #2322, #2323, #2324 )
#1086 = EDGE_LOOP( '', ( #2325, #2326, #2327, #2328 ) )
#1087 = AXIS2_PLACEMENT_3D( '', #2329, #2330, #2331 )
#1088 = EDGE_LOOP( '', ( #2332, #2333, #2334, #2335 ) )
#1089 = AXIS2_PLACEMENT_3D( '', #2336, #2337, #2338 )
#1090 = EDGE_LOOP( '', ( #2339, #2340, #2341, #2342 ) )
#1091 = AXIS2_PLACEMENT_3D( '', #2343, #2344, #2345 )
#1092 = EDGE_LOOP( '', ( #2346, #2347, #2348, #2349 ) )
#1093 = AXIS2_PLACEMENT_3D( '', #2350, #2351, #2352 )
#1094 = EDGE_LOOP( '', ( #2353, #2354, #2355, #2356 ) )
#1095 = AXIS2_PLACEMENT_3D( '', #2357, #2358, #2359 )
#1096 = EDGE_LOOP( '', ( #2360, #2361, #2362, #2363 ) )
#1097 = AXIS2_PLACEMENT_3D( '', #2364, #2365, #2366 )
#1098 = EDGE_LOOP( '', ( #2367, #2368, #2369, #2370 ) )
#1099 = AXIS2_PLACEMENT_3D( '', #2371, #2372, #2373 )
#1100 = EDGE_LOOP( '', ( #2374, #2375, #2376, #2377 ) )
#1101 = AXIS2_PLACEMENT_3D( '', #2378, #2379, #2380 )
#1102 = EDGE_LOOP( '', ( #2381, #2382, #2383, #2384 ) )
#1103 = AXIS2_PLACEMENT_3D( '', #2385, #2386, #2387 )
#1104 = EDGE_LOOP( '', ( #2388, #2389, #2390, #2391 ) )
#1105 = AXIS2_PLACEMENT_3D( '', #2392, #2393, #2394 )
#1106 = EDGE_LOOP( '', ( #2395, #2396, #2397, #2398 ) )
#1107 = AXIS2_PLACEMENT_3D( '', #2399, #2400, #2401 )
#1108 = EDGE_LOOP( '', ( #2402, #2403, #2404, #2405 ) )
#1109 = AXIS2_PLACEMENT_3D( '', #2406, #2407, #2408 )
#1110 = EDGE_LOOP( '', ( #2409, #2410, #2411, #2412 ) )
#1111 = AXIS2_PLACEMENT_3D( '', #2413, #2414, #2415 )
#1112 = EDGE_LOOP( '', ( #2416, #2417, #2418, #2419 ) )
#1113 = AXIS2_PLACEMENT_3D( '', #2420, #2421, #2422 )
#1114 = EDGE_LOOP( '', ( #2423, #2424, #2425, #2426, #2427 ) )
#1115 = AXIS2_PLACEMENT_3D( '', #2428, #2429, #2430 )
#1116 = EDGE_LOOP( '', ( #2431, #2432, #2433, #2434 ) )
#1117 = AXIS2_PLACEMENT_3D( '', #2435, #2436, #2437 )
#1118 = EDGE_LOOP( '', ( #2438, #2439, #2440, #2441 ) )
#1119 = AXIS2_PLACEMENT_3D( '', #2442, #2443, #2444 )
#1120 = EDGE_LOOP( '', ( #2445, #2446, #2447, #2448 ) )
#1121 = AXIS2_PLACEMENT_3D( '', #2449, #2450, #2451 )
#1122 = EDGE_LOOP( '', ( #2452, #2453, #2454, #2455, #2456, #2457, #2458, #2459, #2460, #2461, #2462, #2463, #2464, #2465, #2466, #2467, #2468, #2469, #2470, #2471, #2472, #2473, #2474, #2475, #2476, #2477, #2478, #2479 ) )
#1123 = AXIS2_PLACEMENT_3D( '', #2480, #2481, #2482 )
#1124 = EDGE_LOOP( '', ( #2483, #2484, #2485, #2486 ) )
#1125 = AXIS2_PLACEMENT_3D( '', #2487, #2488, #2489 )
#1126 = EDGE_LOOP( '', ( #2490, #2491, #2492, #2493 ) )
#1127 = AXIS2_PLACEMENT_3D( '', #2494, #2495, #2496 )
#1128 = EDGE_LOOP( '', ( #2497, #2498, #2499, #2500 ) )
#1129 = AXIS2_PLACEMENT_3D( '', #2501, #2502, #2503 )
#1130 = EDGE_LOOP( '', ( #2504, #2505, #2506, #2507 ) )
#1131 = AXIS2_PLACEMENT_3D( '', #2508, #2509, #2510 )
#1132 = EDGE_LOOP( '', ( #2511, #2512, #2513, #2514 ) )
#1133 = AXIS2_PLACEMENT_3D( '', #2515, #2516, #2517 )
#1134 = EDGE_LOOP( '', ( #2518, #2519, #2520, #2521 ) )
#1135 = AXIS2_PLACEMENT_3D( '', #2522, #2523, #2524 )
#1136 = EDGE_LOOP( '', ( #2525, #2526, #2527, #2528 ) )
#1137 = AXIS2_PLACEMENT_3D( '', #2529, #2530, #2531 )
#1138 = EDGE_LOOP( '', ( #2532, #2533, #2534, #2535 ) )
#1139 = AXIS2_PLACEMENT_3D( '', #2536, #2537, #2538 )
#1140 = EDGE_LOOP( '', ( #2539, #2540, #2541, #2542 ) )
#1141 = AXIS2_PLACEMENT_3D( '', #2543, #2544, #2545 )
#1142 = EDGE_LOOP( '', ( #2546, #2547, #2548, #2549 ) )
#1143 = AXIS2_PLACEMENT_3D( '', #2550, #2551, #2552 )
#1144 = EDGE_LOOP( '', ( #2553, #2554, #2555, #2556 ) )
#1145 = AXIS2_PLACEMENT_3D( '', #2557, #2558, #2559 )
#1146 = EDGE_LOOP( '', ( #2560, #2561, #2562, #2563 ) )
#1147 = AXIS2_PLACEMENT_3D( '', #2564, #2565, #2566 )
#1148 = EDGE_LOOP( '', ( #2567, #2568, #2569, #2570 ) )
#1149 = AXIS2_PLACEMENT_3D( '', #2571, #2572, #2573 )
#1150 = EDGE_LOOP( '', ( #2574, #2575, #2576, #2577 ) )
#1151 = AXIS2_PLACEMENT_3D( '', #2578, #2579, #2580 )
#1152 = EDGE_LOOP( '', ( #2581, #2582, #2583, #2584 ) )
#1153 = AXIS2_PLACEMENT_3D( '', #2585, #2586, #2587 )
#1154 = EDGE_LOOP( '', ( #2588, #2589, #2590, #2591 ) )
#1155 = AXIS2_PLACEMENT_3D( '', #2592, #2593, #2594 )
#1156 = EDGE_LOOP( '', ( #2595, #2596, #2597, #2598 ) )
#1157 = AXIS2_PLACEMENT_3D( '', #2599, #2600, #2601 )
#1158 = EDGE_LOOP( '', ( #2602, #2603, #2604, #2605 ) )
#1159 = AXIS2_PLACEMENT_3D( '', #2606, #2607, #2608 )
#1160 = EDGE_LOOP( '', ( #2609, #2610, #2611, #2612 ) )
#1161 = AXIS2_PLACEMENT_3D( '', #2613, #2614, #2615 )
#1162 = EDGE_LOOP( '', ( #2616, #2617, #2618, #2619 ) )
#1163 = AXIS2_PLACEMENT_3D( '', #2620, #2621, #2622 )
#1164 = EDGE_LOOP( '', ( #2623, #2624, #2625, #2626 ) )
#1165 = AXIS2_PLACEMENT_3D( '', #2627, #2628, #2629 )
#1166 = EDGE_LOOP( '', ( #2630, #2631, #2632, #2633 ) )
#1167 = AXIS2_PLACEMENT_3D( '', #2634, #2635, #2636 )
#1168 = EDGE_LOOP( '', ( #2637, #2638, #2639, #2640 ) )
#1169 = AXIS2_PLACEMENT_3D( '', #2641, #2642, #2643 )
#1170 = EDGE_LOOP( '', ( #2644, #2645, #2646, #2647 ) )
#1171 = AXIS2_PLACEMENT_3D( '', #2648, #2649, #2650 )
#1172 = EDGE_LOOP( '', ( #2651, #2652, #2653, #2654, #2655 ) )
#1173 = AXIS2_PLACEMENT_3D( '', #2656, #2657, #2658 )
#1174 = EDGE_LOOP( '', ( #2659, #2660, #2661, #2662 ) )
#1175 = AXIS2_PLACEMENT_3D( '', #2663, #2664, #2665 )
#1176 = EDGE_LOOP( '', ( #2666, #2667, #2668, #2669 ) )
#1177 = AXIS2_PLACEMENT_3D( '', #2670, #2671, #2672 )
#1178 = EDGE_LOOP( '', ( #2673, #2674, #2675, #2676 ) )
#1179 = AXIS2_PLACEMENT_3D( '', #2677, #2678, #2679 )
#1180 = EDGE_LOOP( '', ( #2680, #2681, #2682, #2683 ) )
#1181 = AXIS2_PLACEMENT_3D( '', #2684, #2685, #2686 )
#1182 = EDGE_LOOP( '', ( #2687, #2688, #2689, #2690 ) )
#1183 = AXIS2_PLACEMENT_3D( '', #2691, #2692, #2693 )
#1184 = EDGE_LOOP( '', ( #2694, #2695, #2696, #2697 ) )
#1185 = AXIS2_PLACEMENT_3D( '', #2698, #2699, #2700 )
#1186 = EDGE_LOOP( '', ( #2701, #2702, #2703, #2704 ) )
#1187 = AXIS2_PLACEMENT_3D( '', #2705, #2706, #2707 )
#1188 = EDGE_LOOP( '', ( #2708, #2709, #2710, #2711 ) )
#1189 = AXIS2_PLACEMENT_3D( '', #2712, #2713, #2714 )
#1190 = EDGE_LOOP( '', ( #2715, #2716, #2717, #2718 ) )
#1191 = AXIS2_PLACEMENT_3D( '', #2719, #2720, #2721 )
#1192 = EDGE_LOOP( '', ( #2722, #2723, #2724, #2725 ) )
#1193 = AXIS2_PLACEMENT_3D( '', #2726, #2727, #2728 )
#1194 = EDGE_LOOP( '', ( #2729, #2730, #2731, #2732 ) )
#1195 = AXIS2_PLACEMENT_3D( '', #2733, #2734, #2735 )
#1196 = EDGE_LOOP( '', ( #2736, #2737, #2738, #2739 ) )
#1197 = AXIS2_PLACEMENT_3D( '', #2740, #2741, #2742 )
#1198 = EDGE_LOOP( '', ( #2743, #2744, #2745, #2746 ) )
#1199 = AXIS2_PLACEMENT_3D( '', #2747, #2748, #2749 )
#1200 = EDGE_LOOP( '', ( #2750, #2751, #2752, #2753 ) )
#1201 = AXIS2_PLACEMENT_3D( '', #2754, #2755, #2756 )
#1202 = EDGE_LOOP( '', ( #2757, #2758, #2759, #2760 ) )
#1203 = AXIS2_PLACEMENT_3D( '', #2761, #2762, #2763 )
#1204 = EDGE_LOOP( '', ( #2764, #2765, #2766, #2767 ) )
#1205 = AXIS2_PLACEMENT_3D( '', #2768, #2769, #2770 )
#1206 = EDGE_LOOP( '', ( #2771, #2772, #2773, #2774 ) )
#1207 = AXIS2_PLACEMENT_3D( '', #2775, #2776, #2777 )
#1208 = EDGE_LOOP( '', ( #2778, #2779, #2780, #2781 ) )
#1209 = AXIS2_PLACEMENT_3D( '', #2782, #2783, #2784 )
#1210 = EDGE_LOOP( '', ( #2785, #2786, #2787, #2788 ) )
#1211 = AXIS2_PLACEMENT_3D( '', #2789, #2790, #2791 )
#1212 = EDGE_LOOP( '', ( #2792, #2793, #2794, #2795 ) )
#1213 = AXIS2_PLACEMENT_3D( '', #2796, #2797, #2798 )
#1214 = EDGE_LOOP( '', ( #2799, #2800, #2801, #2802 ) )
#1215 = AXIS2_PLACEMENT_3D( '', #2803, #2804, #2805 )
#1216 = EDGE_LOOP( '', ( #2806, #2807, #2808, #2809 ) )
#1217 = AXIS2_PLACEMENT_3D( '', #2810, #2811, #2812 )
#1218 = EDGE_LOOP( '', ( #2813, #2814, #2815, #2816 ) )
#1219 = AXIS2_PLACEMENT_3D( '', #2817, #2818, #2819 )
#1220 = EDGE_LOOP( '', ( #2820, #2821, #2822, #2823 ) )
#1221 = AXIS2_PLACEMENT_3D( '', #2824, #2825, #2826 )
#1222 = EDGE_LOOP( '', ( #2827, #2828, #2829, #2830 ) )
#1223 = AXIS2_PLACEMENT_3D( '', #2831, #2832, #2833 )
#1224 = EDGE_LOOP( '', ( #2834, #2835, #2836, #2837 ) )
#1225 = AXIS2_PLACEMENT_3D( '', #2838, #2839, #2840 )
#1226 = EDGE_LOOP( '', ( #2841, #2842, #2843, #2844 ) )
#1227 = AXIS2_PLACEMENT_3D( '', #2845, #2846, #2847 )
#1228 = EDGE_LOOP( '', ( #2848, #2849, #2850, #2851 ) )
#1229 = AXIS2_PLACEMENT_3D( '', #2852, #2853, #2854 )
#1230 = EDGE_LOOP( '', ( #2855, #2856, #2857, #2858 ) )
#1231 = AXIS2_PLACEMENT_3D( '', #2859, #2860, #2861 )
#1232 = EDGE_LOOP( '', ( #2862, #2863, #2864, #2865 ) )
#1233 = AXIS2_PLACEMENT_3D( '', #2866, #2867, #2868 )
#1234 = EDGE_LOOP( '', ( #2869, #2870, #2871, #2872 ) )
#1235 = AXIS2_PLACEMENT_3D( '', #2873, #2874, #2875 )
#1236 = EDGE_LOOP( '', ( #2876, #2877, #2878, #2879 ) )
#1237 = AXIS2_PLACEMENT_3D( '', #2880, #2881, #2882 )
#1238 = EDGE_LOOP( '', ( #2883, #2884, #2885, #2886 ) )
#1239 = AXIS2_PLACEMENT_3D( '', #2887, #2888, #2889 )
#1240 = EDGE_LOOP( '', ( #2890, #2891, #2892, #2893 ) )
#1241 = AXIS2_PLACEMENT_3D( '', #2894, #2895, #2896 )
#1242 = EDGE_LOOP( '', ( #2897, #2898, #2899, #2900 ) )
#1243 = AXIS2_PLACEMENT_3D( '', #2901, #2902, #2903 )
#1244 = EDGE_LOOP( '', ( #2904, #2905, #2906, #2907 ) )
#1245 = AXIS2_PLACEMENT_3D( '', #2908, #2909, #2910 )
#1246 = EDGE_LOOP( '', ( #2911, #2912, #2913, #2914 ) )
#1247 = AXIS2_PLACEMENT_3D( '', #2915, #2916, #2917 )
#1248 = EDGE_LOOP( '', ( #2918, #2919, #2920, #2921 ) )
#1249 = AXIS2_PLACEMENT_3D( '', #2922, #2923, #2924 )
#1250 = EDGE_LOOP( '', ( #2925, #2926, #2927, #2928 ) )
#1251 = AXIS2_PLACEMENT_3D( '', #2929, #2930, #2931 )
#1252 = EDGE_LOOP( '', ( #2932, #2933, #2934, #2935 ) )
#1253 = AXIS2_PLACEMENT_3D( '', #2936, #2937, #2938 )
#1254 = EDGE_LOOP( '', ( #2939, #2940, #2941, #2942 ) )
#1255 = AXIS2_PLACEMENT_3D( '', #2943, #2944, #2945 )
#1256 = EDGE_LOOP( '', ( #2946, #2947, #2948, #2949 ) )
#1257 = AXIS2_PLACEMENT_3D( '', #2950, #2951, #2952 )
#1258 = EDGE_LOOP( '', ( #2953, #2954, #2955, #2956 ) )
#1259 = AXIS2_PLACEMENT_3D( '', #2957, #2958, #2959 )
#1260 = EDGE_LOOP( '', ( #2960, #2961, #2962, #2963 ) )
#1261 = EDGE_LOOP( '', ( #2964 ) )
#1262 = AXIS2_PLACEMENT_3D( '', #2965, #2966, #2967 )
#1263 = EDGE_LOOP( '', ( #2968, #2969, #2970, #2971 ) )
#1264 = AXIS2_PLACEMENT_3D( '', #2972, #2973, #2974 )
#1265 = EDGE_LOOP( '', ( #2975, #2976, #2977, #2978 ) )
#1266 = AXIS2_PLACEMENT_3D( '', #2979, #2980, #2981 )
#1267 = EDGE_LOOP( '', ( #2982, #2983, #2984, #2985 ) )
#1268 = AXIS2_PLACEMENT_3D( '', #2986, #2987, #2988 )
#1269 = EDGE_LOOP( '', ( #2989, #2990, #2991, #2992 ) )
#1270 = AXIS2_PLACEMENT_3D( '', #2993, #2994, #2995 )
#1271 = EDGE_LOOP( '', ( #2996, #2997, #2998, #2999 ) )
#1272 = AXIS2_PLACEMENT_3D( '', #3000, #3001, #3002 )
#1273 = EDGE_LOOP( '', ( #3003, #3004, #3005, #3006 ) )
#1274 = AXIS2_PLACEMENT_3D( '', #3007, #3008, #3009 )
#1275 = EDGE_LOOP( '', ( #3010, #3011, #3012, #3013 ) )
#1276 = AXIS2_PLACEMENT_3D( '', #3014, #3015, #3016 )
#1277 = EDGE_LOOP( '', ( #3017, #3018, #3019, #3020 ) )
#1278 = AXIS2_PLACEMENT_3D( '', #3021, #3022, #3023 )
#1279 = EDGE_LOOP( '', ( #3024, #3025, #3026, #3027 ) )
#1280 = AXIS2_PLACEMENT_3D( '', #3028, #3029, #3030 )
#1281 = EDGE_LOOP( '', ( #3031, #3032, #3033, #3034 ) )
#1282 = AXIS2_PLACEMENT_3D( '', #3035, #3036, #3037 )
#1283 = EDGE_LOOP( '', ( #3038, #3039, #3040, #3041 ) )
#1284 = AXIS2_PLACEMENT_3D( '', #3042, #3043, #3044 )
#1285 = EDGE_LOOP( '', ( #3045, #3046, #3047, #3048 ) )
#1286 = AXIS2_PLACEMENT_3D( '', #3049, #3050, #3051 )
#1287 = EDGE_LOOP( '', ( #3052, #3053, #3054, #3055 ) )
#1288 = AXIS2_PLACEMENT_3D( '', #3056, #3057, #3058 )
#1289 = EDGE_LOOP( '', ( #3059, #3060, #3061, #3062 ) )
#1290 = AXIS2_PLACEMENT_3D( '', #3063, #3064, #3065 )
#1291 = EDGE_LOOP( '', ( #3066, #3067, #3068, #3069 ) )
#1292 = AXIS2_PLACEMENT_3D( '', #3070, #3071, #3072 )
#1293 = EDGE_LOOP( '', ( #3073, #3074, #3075, #3076 ) )
#1294 = AXIS2_PLACEMENT_3D( '', #3077, #3078, #3079 )
#1295 = EDGE_LOOP( '', ( #3080, #3081, #3082, #3083 ) )
#1296 = AXIS2_PLACEMENT_3D( '', #3084, #3085, #3086 )
#1297 = EDGE_LOOP( '', ( #3087, #3088, #3089, #3090 ) )
#1298 = AXIS2_PLACEMENT_3D( '', #3091, #3092, #3093 )
#1299 = EDGE_LOOP( '', ( #3094, #3095, #3096, #3097 ) )
#1300 = AXIS2_PLACEMENT_3D( '', #3098, #3099, #3100 )
#1301 = EDGE_LOOP( '', ( #3101, #3102, #3103, #3104 ) )
#1302 = AXIS2_PLACEMENT_3D( '', #3105, #3106, #3107 )
#1303 = EDGE_LOOP( '', ( #3108, #3109, #3110, #3111 ) )
#1304 = AXIS2_PLACEMENT_3D( '', #3112, #3113, #3114 )
#1305 = EDGE_LOOP( '', ( #3115, #3116, #3117, #3118 ) )
#1306 = AXIS2_PLACEMENT_3D( '', #3119, #3120, #3121 )
#1307 = EDGE_LOOP( '', ( #3122, #3123, #3124, #3125 ) )
#1308 = AXIS2_PLACEMENT_3D( '', #3126, #3127, #3128 )
#1309 = EDGE_LOOP( '', ( #3129, #3130, #3131, #3132 ) )
#1310 = AXIS2_PLACEMENT_3D( '', #3133, #3134, #3135 )
#1311 = EDGE_LOOP( '', ( #3136, #3137, #3138, #3139 ) )
#1312 = AXIS2_PLACEMENT_3D( '', #3140, #3141, #3142 )
#1313 = EDGE_LOOP( '', ( #3143, #3144, #3145, #3146 ) )
#1314 = AXIS2_PLACEMENT_3D( '', #3147, #3148, #3149 )
#1315 = EDGE_LOOP( '', ( #3150, #3151, #3152, #3153 ) )
#1316 = AXIS2_PLACEMENT_3D( '', #3154, #3155, #3156 )
#1317 = EDGE_LOOP( '', ( #3157, #3158, #3159, #3160 ) )
#1318 = AXIS2_PLACEMENT_3D( '', #3161, #3162, #3163 )
#1319 = EDGE_LOOP( '', ( #3164, #3165, #3166, #3167 ) )
#1320 = AXIS2_PLACEMENT_3D( '', #3168, #3169, #3170 )
#1321 = EDGE_LOOP( '', ( #3171, #3172, #3173, #3174 ) )
#1322 = AXIS2_PLACEMENT_3D( '', #3175, #3176, #3177 )
#1323 = EDGE_LOOP( '', ( #3178, #3179, #3180, #3181 ) )
#1324 = AXIS2_PLACEMENT_3D( '', #3182, #3183, #3184 )
#1325 = EDGE_LOOP( '', ( #3185, #3186, #3187, #3188 ) )
#1326 = AXIS2_PLACEMENT_3D( '', #3189, #3190, #3191 )
#1327 = EDGE_LOOP( '', ( #3192, #3193, #3194, #3195 ) )
#1328 = AXIS2_PLACEMENT_3D( '', #3196, #3197, #3198 )
#1329 = EDGE_LOOP( '', ( #3199, #3200, #3201, #3202 ) )
#1330 = AXIS2_PLACEMENT_3D( '', #3203, #3204, #3205 )
#1331 = EDGE_LOOP( '', ( #3206, #3207, #3208, #3209 ) )
#1332 = AXIS2_PLACEMENT_3D( '', #3210, #3211, #3212 )
#1333 = EDGE_LOOP( '', ( #3213, #3214, #3215, #3216 ) )
#1334 = AXIS2_PLACEMENT_3D( '', #3217, #3218, #3219 )
#1335 = EDGE_LOOP( '', ( #3220, #3221, #3222, #3223 ) )
#1336 = AXIS2_PLACEMENT_3D( '', #3224, #3225, #3226 )
#1337 = EDGE_LOOP( '', ( #3227, #3228, #3229, #3230 ) )
#1338 = AXIS2_PLACEMENT_3D( '', #3231, #3232, #3233 )
#1339 = EDGE_LOOP( '', ( #3234, #3235, #3236, #3237 ) )
#1340 = AXIS2_PLACEMENT_3D( '', #3238, #3239, #3240 )
#1341 = EDGE_LOOP( '', ( #3241, #3242, #3243, #3244 ) )
#1342 = AXIS2_PLACEMENT_3D( '', #3245, #3246, #3247 )
#1343 = EDGE_LOOP( '', ( #3248, #3249, #3250, #3251 ) )
#1344 = AXIS2_PLACEMENT_3D( '', #3252, #3253, #3254 )
#1345 = EDGE_LOOP( '', ( #3255, #3256, #3257, #3258 ) )
#1346 = AXIS2_PLACEMENT_3D( '', #3259, #3260, #3261 )
#1347 = EDGE_LOOP( '', ( #3262, #3263, #3264, #3265 ) )
#1348 = EDGE_LOOP( '', ( #3266 ) )
#1349 = AXIS2_PLACEMENT_3D( '', #3267, #3268, #3269 )
#1350 = EDGE_LOOP( '', ( #3270, #3271, #3272, #3273 ) )
#1351 = AXIS2_PLACEMENT_3D( '', #3274, #3275, #3276 )
#1352 = EDGE_LOOP( '', ( #3277, #3278, #3279, #3280 ) )
#1353 = AXIS2_PLACEMENT_3D( '', #3281, #3282, #3283 )
#1354 = EDGE_LOOP( '', ( #3284, #3285, #3286, #3287 ) )
#1355 = AXIS2_PLACEMENT_3D( '', #3288, #3289, #3290 )
#1356 = EDGE_LOOP( '', ( #3291, #3292, #3293, #3294 ) )
#1357 = AXIS2_PLACEMENT_3D( '', #3295, #3296, #3297 )
#1358 = EDGE_LOOP( '', ( #3298, #3299, #3300, #3301 ) )
#1359 = AXIS2_PLACEMENT_3D( '', #3302, #3303, #3304 )
#1360 = EDGE_LOOP( '', ( #3305, #3306, #3307, #3308 ) )
#1361 = AXIS2_PLACEMENT_3D( '', #3309, #3310, #3311 )
#1362 = EDGE_LOOP( '', ( #3312, #3313, #3314, #3315 ) )
#1363 = AXIS2_PLACEMENT_3D( '', #3316, #3317, #3318 )
#1364 = EDGE_LOOP( '', ( #3319, #3320, #3321, #3322 ) )
#1365 = AXIS2_PLACEMENT_3D( '', #3323, #3324, #3325 )
#1366 = EDGE_LOOP( '', ( #3326, #3327, #3328, #3329 ) )
#1367 = AXIS2_PLACEMENT_3D( '', #3330, #3331, #3332 )
#1368 = EDGE_LOOP( '', ( #3333, #3334, #3335, #3336 ) )
#1369 = AXIS2_PLACEMENT_3D( '', #3337, #3338, #3339 )
#1370 = EDGE_LOOP( '', ( #3340, #3341, #3342, #3343 ) )
#1371 = AXIS2_PLACEMENT_3D( '', #3344, #3345, #3346 )
#1372 = EDGE_LOOP( '', ( #3347, #3348, #3349, #3350 ) )
#1373 = AXIS2_PLACEMENT_3D( '', #3351, #3352, #3353 )
#1374 = EDGE_LOOP( '', ( #3354, #3355, #3356, #3357 ) )
#1375 = AXIS2_PLACEMENT_3D( '', #3358, #3359, #3360 )
#1376 = EDGE_LOOP( '', ( #3361, #3362, #3363, #3364 ) )
#1377 = AXIS2_PLACEMENT_3D( '', #3365, #3366, #3367 )
#1378 = EDGE_LOOP( '', ( #3368, #3369, #3370, #3371 ) )
#1379 = AXIS2_PLACEMENT_3D( '', #3372, #3373, #3374 )
#1380 = EDGE_LOOP( '', ( #3375, #3376, #3377, #3378 ) )
#1381 = AXIS2_PLACEMENT_3D( '', #3379, #3380, #3381 )
#1382 = EDGE_LOOP( '', ( #3382, #3383, #3384, #3385 ) )
#1383 = AXIS2_PLACEMENT_3D( '', #3386, #3387, #3388 )
#1384 = EDGE_LOOP( '', ( #3389, #3390, #3391, #3392 ) )
#1385 = AXIS2_PLACEMENT_3D( '', #3393, #3394, #3395 )
#1386 = EDGE_LOOP( '', ( #3396, #3397, #3398, #3399 ) )
#1387 = AXIS2_PLACEMENT_3D( '', #3400, #3401, #3402 )
#1388 = EDGE_LOOP( '', ( #3403, #3404, #3405, #3406 ) )
#1389 = AXIS2_PLACEMENT_3D( '', #3407, #3408, #3409 )
#1390 = EDGE_LOOP( '', ( #3410, #3411, #3412, #3413 ) )
#1391 = AXIS2_PLACEMENT_3D( '', #3414, #3415, #3416 )
#1392 = EDGE_LOOP( '', ( #3417, #3418, #3419, #3420 ) )
#1393 = AXIS2_PLACEMENT_3D( '', #3421, #3422, #3423 )
#1394 = EDGE_LOOP( '', ( #3424, #3425, #3426, #3427 ) )
#1395 = AXIS2_PLACEMENT_3D( '', #3428, #3429, #3430 )
#1396 = EDGE_LOOP( '', ( #3431, #3432, #3433, #3434 ) )
#1397 = AXIS2_PLACEMENT_3D( '', #3435, #3436, #3437 )
#1398 = EDGE_LOOP( '', ( #3438, #3439, #3440, #3441 ) )
#1399 = AXIS2_PLACEMENT_3D( '', #3442, #3443, #3444 )
#1400 = EDGE_LOOP( '', ( #3445, #3446, #3447, #3448 ) )
#1401 = AXIS2_PLACEMENT_3D( '', #3449, #3450, #3451 )
#1402 = EDGE_LOOP( '', ( #3452, #3453, #3454, #3455 ) )
#1403 = AXIS2_PLACEMENT_3D( '', #3456, #3457, #3458 )
#1404 = EDGE_LOOP( '', ( #3459, #3460, #3461, #3462 ) )
#1405 = AXIS2_PLACEMENT_3D( '', #3463, #3464, #3465 )
#1406 = EDGE_LOOP( '', ( #3466, #3467, #3468, #3469 ) )
#1407 = AXIS2_PLACEMENT_3D( '', #3470, #3471, #3472 )
#1408 = EDGE_LOOP( '', ( #3473, #3474, #3475, #3476 ) )
#1409 = AXIS2_PLACEMENT_3D( '', #3477, #3478, #3479 )
#1410 = EDGE_LOOP( '', ( #3480, #3481, #3482, #3483 ) )
#1411 = AXIS2_PLACEMENT_3D( '', #3484, #3485, #3486 )
#1412 = EDGE_LOOP( '', ( #3487, #3488, #3489, #3490 ) )
#1413 = AXIS2_PLACEMENT_3D( '', #3491, #3492, #3493 )
#1414 = EDGE_LOOP( '', ( #3494, #3495, #3496, #3497 ) )
#1415 = AXIS2_PLACEMENT_3D( '', #3498, #3499, #3500 )
#1416 = EDGE_LOOP( '', ( #3501, #3502, #3503, #3504 ) )
#1417 = AXIS2_PLACEMENT_3D( '', #3505, #3506, #3507 )
#1418 = EDGE_LOOP( '', ( #3508, #3509, #3510, #3511 ) )
#1419 = AXIS2_PLACEMENT_3D( '', #3512, #3513, #3514 )
#1420 = EDGE_LOOP( '', ( #3515, #3516, #3517, #3518 ) )
#1421 = AXIS2_PLACEMENT_3D( '', #3519, #3520, #3521 )
#1422 = EDGE_LOOP( '', ( #3522 ) )
#1423 = AXIS2_PLACEMENT_3D( '', #3523, #3524, #3525 )
#1424 = EDGE_LOOP( '', ( #3526, #3527, #3528, #3529 ) )
#1425 = AXIS2_PLACEMENT_3D( '', #3530, #3531, #3532 )
#1426 = EDGE_LOOP( '', ( #3533, #3534, #3535, #3536 ) )
#1427 = AXIS2_PLACEMENT_3D( '', #3537, #3538, #3539 )
#1428 = EDGE_LOOP( '', ( #3540, #3541, #3542, #3543 ) )
#1429 = AXIS2_PLACEMENT_3D( '', #3544, #3545, #3546 )
#1430 = EDGE_LOOP( '', ( #3547, #3548, #3549, #3550 ) )
#1431 = AXIS2_PLACEMENT_3D( '', #3551, #3552, #3553 )
#1432 = EDGE_LOOP( '', ( #3554, #3555, #3556, #3557 ) )
#1433 = EDGE_LOOP( '', ( #3558 ) )
#1434 = AXIS2_PLACEMENT_3D( '', #3559, #3560, #3561 )
#1435 = EDGE_LOOP( '', ( #3562, #3563, #3564, #3565, #3566 ) )
#1436 = AXIS2_PLACEMENT_3D( '', #3567, #3568, #3569 )
#1437 = EDGE_LOOP( '', ( #3570, #3571, #3572, #3573 ) )
#1438 = AXIS2_PLACEMENT_3D( '', #3574, #3575, #3576 )
#1439 = EDGE_LOOP( '', ( #3577, #3578, #3579, #3580 ) )
#1440 = AXIS2_PLACEMENT_3D( '', #3581, #3582, #3583 )
#1441 = EDGE_LOOP( '', ( #3584, #3585, #3586, #3587 ) )
#1442 = AXIS2_PLACEMENT_3D( '', #3588, #3589, #3590 )
#1443 = EDGE_LOOP( '', ( #3591, #3592, #3593, #3594 ) )
#1444 = AXIS2_PLACEMENT_3D( '', #3595, #3596, #3597 )
#1445 = EDGE_LOOP( '', ( #3598, #3599, #3600, #3601 ) )
#1446 = AXIS2_PLACEMENT_3D( '', #3602, #3603, #3604 )
#1447 = EDGE_LOOP( '', ( #3605, #3606, #3607, #3608 ) )
#1448 = AXIS2_PLACEMENT_3D( '', #3609, #3610, #3611 )
#1449 = EDGE_LOOP( '', ( #3612, #3613, #3614, #3615 ) )
#1450 = AXIS2_PLACEMENT_3D( '', #3616, #3617, #3618 )
#1451 = EDGE_LOOP( '', ( #3619 ) )
#1452 = EDGE_LOOP( '', ( #3620, #3621, #3622, #3623 ) )
#1453 = AXIS2_PLACEMENT_3D( '', #3624, #3625, #3626 )
#1454 = EDGE_LOOP( '', ( #3627 ) )
#1455 = AXIS2_PLACEMENT_3D( '', #3628, #3629, #3630 )
#1456 = EDGE_LOOP( '', ( #3631, #3632, #3633, #3634 ) )
#1457 = AXIS2_PLACEMENT_3D( '', #3635, #3636, #3637 )
#1458 = EDGE_LOOP( '', ( #3638, #3639, #3640, #3641, #3642, #3643, #3644, #3645, #3646, #3647, #3648, #3649, #3650, #3651, #3652, #3653, #3654, #3655, #3656, #3657, #3658, #3659, #3660, #3661, #3662, #3663, #3664, #3665, #3666, #3667, #3668, #3669, #3670, #3671, #3672, #3673, #3674, #3675, #3676, #3677, #3678, #3679, #3680, #3681, #3682, #3683, #3684, #3685, #3686, #3687, #3688, #3689, #3690, #36…
#1459 = AXIS2_PLACEMENT_3D( '', #3763, #3764, #3765 )
#1460 = EDGE_LOOP( '', ( #3766, #3767, #3768, #3769 ) )
#1461 = AXIS2_PLACEMENT_3D( '', #3770, #3771, #3772 )
#1462 = EDGE_LOOP( '', ( #3773, #3774, #3775, #3776 ) )
#1463 = AXIS2_PLACEMENT_3D( '', #3777, #3778, #3779 )
#1464 = EDGE_LOOP( '', ( #3780 ) )
#1465 = AXIS2_PLACEMENT_3D( '', #3781, #3782, #3783 )
#1466 = EDGE_LOOP( '', ( #3784, #3785, #3786, #3787 ) )
#1467 = AXIS2_PLACEMENT_3D( '', #3788, #3789, #3790 )
#1468 = EDGE_LOOP( '', ( #3791, #3792, #3793, #3794 ) )
#1469 = AXIS2_PLACEMENT_3D( '', #3795, #3796, #3797 )
#1470 = EDGE_LOOP( '', ( #3798, #3799, #3800, #3801 ) )
#1471 = AXIS2_PLACEMENT_3D( '', #3802, #3803, #3804 )
#1472 = EDGE_LOOP( '', ( #3805, #3806, #3807, #3808 ) )
#1473 = AXIS2_PLACEMENT_3D( '', #3809, #3810, #3811 )
#1474 = EDGE_LOOP( '', ( #3812, #3813, #3814, #3815 ) )
#1475 = AXIS2_PLACEMENT_3D( '', #3816, #3817, #3818 )
#1476 = EDGE_LOOP( '', ( #3819, #3820, #3821, #3822 ) )
#1477 = AXIS2_PLACEMENT_3D( '', #3823, #3824, #3825 )
#1478 = EDGE_LOOP( '', ( #3826, #3827, #3828, #3829 ) )
#1479 = AXIS2_PLACEMENT_3D( '', #3830, #3831, #3832 )
#1480 = EDGE_LOOP( '', ( #3833, #3834, #3835, #3836 ) )
#1481 = AXIS2_PLACEMENT_3D( '', #3837, #3838, #3839 )
#1482 = EDGE_LOOP( '', ( #3840, #3841, #3842, #3843 ) )
#1483 = AXIS2_PLACEMENT_3D( '', #3844, #3845, #3846 )
#1484 = EDGE_LOOP( '', ( #3847, #3848, #3849, #3850 ) )
#1485 = AXIS2_PLACEMENT_3D( '', #3851, #3852, #3853 )
#1486 = EDGE_LOOP( '', ( #3854, #3855, #3856, #3857 ) )
#1487 = AXIS2_PLACEMENT_3D( '', #3858, #3859, #3860 )
#1488 = EDGE_LOOP( '', ( #3861, #3862, #3863, #3864 ) )
#1489 = AXIS2_PLACEMENT_3D( '', #3865, #3866, #3867 )
#1490 = EDGE_LOOP( '', ( #3868, #3869, #3870, #3871 ) )
#1491 = AXIS2_PLACEMENT_3D( '', #3872, #3873, #3874 )
#1492 = EDGE_LOOP( '', ( #3875, #3876, #3877, #3878 ) )
#1493 = AXIS2_PLACEMENT_3D( '', #3879, #3880, #3881 )
#1494 = EDGE_LOOP( '', ( #3882, #3883, #3884, #3885 ) )
#1495 = AXIS2_PLACEMENT_3D( '', #3886, #3887, #3888 )
#1496 = EDGE_LOOP( '', ( #3889, #3890, #3891, #3892 ) )
#1497 = AXIS2_PLACEMENT_3D( '', #3893, #3894, #3895 )
#1498 = EDGE_LOOP( '', ( #3896, #3897, #3898, #3899 ) )
#1499 = AXIS2_PLACEMENT_3D( '', #3900, #3901, #3902 )
#1500 = EDGE_LOOP( '', ( #3903, #3904, #3905, #3906 ) )
#1501 = AXIS2_PLACEMENT_3D( '', #3907, #3908, #3909 )
#1502 = EDGE_LOOP( '', ( #3910, #3911, #3912, #3913 ) )
#1503 = AXIS2_PLACEMENT_3D( '', #3914, #3915, #3916 )
#1504 = EDGE_LOOP( '', ( #3917, #3918, #3919, #3920 ) )
#1505 = AXIS2_PLACEMENT_3D( '', #3921, #3922, #3923 )
#1506 = EDGE_LOOP( '', ( #3924, #3925, #3926, #3927 ) )
#1507 = AXIS2_PLACEMENT_3D( '', #3928, #3929, #3930 )
#1508 = EDGE_LOOP( '', ( #3931, #3932, #3933, #3934 ) )
#1509 = AXIS2_PLACEMENT_3D( '', #3935, #3936, #3937 )
#1510 = EDGE_LOOP( '', ( #3938, #3939, #3940, #3941 ) )
#1511 = AXIS2_PLACEMENT_3D( '', #3942, #3943, #3944 )
#1512 = EDGE_LOOP( '', ( #3945, #3946, #3947, #3948 ) )
#1513 = AXIS2_PLACEMENT_3D( '', #3949, #3950, #3951 )
#1514 = EDGE_LOOP( '', ( #3952, #3953, #3954, #3955 ) )
#1515 = AXIS2_PLACEMENT_3D( '', #3956, #3957, #3958 )
#1516 = EDGE_LOOP( '', ( #3959, #3960, #3961, #3962 ) )
#1517 = AXIS2_PLACEMENT_3D( '', #3963, #3964, #3965 )
#1518 = EDGE_LOOP( '', ( #3966, #3967, #3968, #3969 ) )
#1519 = AXIS2_PLACEMENT_3D( '', #3970, #3971, #3972 )
#1520 = EDGE_LOOP( '', ( #3973, #3974, #3975, #3976 ) )
#1521 = AXIS2_PLACEMENT_3D( '', #3977, #3978, #3979 )
#1522 = EDGE_LOOP( '', ( #3980, #3981, #3982, #3983 ) )
#1523 = AXIS2_PLACEMENT_3D( '', #3984, #3985, #3986 )
#1524 = EDGE_LOOP( '', ( #3987, #3988, #3989, #3990 ) )
#1525 = AXIS2_PLACEMENT_3D( '', #3991, #3992, #3993 )
#1526 = EDGE_LOOP( '', ( #3994, #3995, #3996, #3997 ) )
#1527 = AXIS2_PLACEMENT_3D( '', #3998, #3999, #4000 )
#1528 = EDGE_LOOP( '', ( #4001, #4002, #4003, #4004 ) )
#1529 = AXIS2_PLACEMENT_3D( '', #4005, #4006, #4007 )
#1530 = EDGE_LOOP( '', ( #4008, #4009, #4010, #4011 ) )
#1531 = AXIS2_PLACEMENT_3D( '', #4012, #4013, #4014 )
#1532 = EDGE_LOOP( '', ( #4015 ) )
#1533 = AXIS2_PLACEMENT_3D( '', #4016, #4017, #4018 )
#1534 = EDGE_LOOP( '', ( #4019, #4020, #4021, #4022 ) )
#1535 = AXIS2_PLACEMENT_3D( '', #4023, #4024, #4025 )
#1536 = EDGE_LOOP( '', ( #4026 ) )
#1537 = AXIS2_PLACEMENT_3D( '', #4027, #4028, #4029 )
#1538 = EDGE_LOOP( '', ( #4030, #4031, #4032, #4033 ) )
#1539 = AXIS2_PLACEMENT_3D( '', #4034, #4035, #4036 )
#1540 = EDGE_LOOP( '', ( #4037, #4038, #4039, #4040 ) )
#1541 = AXIS2_PLACEMENT_3D( '', #4041, #4042, #4043 )
#1542 = EDGE_LOOP( '', ( #4044, #4045, #4046, #4047 ) )
#1543 = AXIS2_PLACEMENT_3D( '', #4048, #4049, #4050 )
#1544 = EDGE_LOOP( '', ( #4051, #4052, #4053, #4054 ) )
#1545 = AXIS2_PLACEMENT_3D( '', #4055, #4056, #4057 )
#1546 = EDGE_LOOP( '', ( #4058, #4059, #4060, #4061 ) )
#1547 = AXIS2_PLACEMENT_3D( '', #4062, #4063, #4064 )
#1548 = EDGE_LOOP( '', ( #4065, #4066, #4067, #4068 ) )
#1549 = AXIS2_PLACEMENT_3D( '', #4069, #4070, #4071 )
#1550 = EDGE_LOOP( '', ( #4072, #4073, #4074, #4075 ) )
#1551 = AXIS2_PLACEMENT_3D( '', #4076, #4077, #4078 )
#1552 = EDGE_LOOP( '', ( #4079, #4080, #4081, #4082 ) )
#1553 = AXIS2_PLACEMENT_3D( '', #4083, #4084, #4085 )
#1554 = EDGE_LOOP( '', ( #4086, #4087, #4088, #4089 ) )
#1555 = AXIS2_PLACEMENT_3D( '', #4090, #4091, #4092 )
#1556 = EDGE_LOOP( '', ( #4093, #4094, #4095, #4096 ) )
#1557 = AXIS2_PLACEMENT_3D( '', #4097, #4098, #4099 )
#1558 = EDGE_LOOP( '', ( #4100, #4101, #4102, #4103 ) )
#1559 = AXIS2_PLACEMENT_3D( '', #4104, #4105, #4106 )
#1560 = EDGE_LOOP( '', ( #4107, #4108, #4109, #4110 ) )
#1561 = AXIS2_PLACEMENT_3D( '', #4111, #4112, #4113 )
#1562 = EDGE_LOOP( '', ( #4114, #4115, #4116, #4117 ) )
#1563 = AXIS2_PLACEMENT_3D( '', #4118, #4119, #4120 )
#1564 = EDGE_LOOP( '', ( #4121, #4122, #4123, #4124 ) )
#1565 = AXIS2_PLACEMENT_3D( '', #4125, #4126, #4127 )
#1566 = EDGE_LOOP( '', ( #4128, #4129, #4130, #4131 ) )
#1567 = AXIS2_PLACEMENT_3D( '', #4132, #4133, #4134 )
#1568 = EDGE_LOOP( '', ( #4135, #4136, #4137, #4138 ) )
#1569 = AXIS2_PLACEMENT_3D( '', #4139, #4140, #4141 )
#1570 = EDGE_LOOP( '', ( #4142, #4143, #4144, #4145 ) )
#1571 = AXIS2_PLACEMENT_3D( '', #4146, #4147, #4148 )
#1572 = EDGE_LOOP( '', ( #4149, #4150, #4151, #4152 ) )
#1573 = AXIS2_PLACEMENT_3D( '', #4153, #4154, #4155 )
#1574 = EDGE_LOOP( '', ( #4156, #4157, #4158, #4159 ) )
#1575 = AXIS2_PLACEMENT_3D( '', #4160, #4161, #4162 )
#1576 = EDGE_LOOP( '', ( #4163, #4164, #4165, #4166 ) )
#1577 = AXIS2_PLACEMENT_3D( '', #4167, #4168, #4169 )
#1578 = EDGE_LOOP( '', ( #4170, #4171, #4172, #4173 ) )
#1579 = AXIS2_PLACEMENT_3D( '', #4174, #4175, #4176 )
#1580 = EDGE_LOOP( '', ( #4177, #4178, #4179, #4180, #4181 ) )
#1581 = AXIS2_PLACEMENT_3D( '', #4182, #4183, #4184 )
#1582 = EDGE_LOOP( '', ( #4185, #4186, #4187, #4188, #4189, #4190, #4191, #4192, #4193, #4194, #4195, #4196, #4197, #4198, #4199, #4200, #4201, #4202 ) )
#1583 = AXIS2_PLACEMENT_3D( '', #4203, #4204, #4205 )
#1584 = EDGE_LOOP( '', ( #4206, #4207, #4208, #4209 ) )
#1585 = AXIS2_PLACEMENT_3D( '', #4210, #4211, #4212 )
#1586 = EDGE_LOOP( '', ( #4213, #4214, #4215, #4216 ) )
#1587 = AXIS2_PLACEMENT_3D( '', #4217, #4218, #4219 )
#1588 = EDGE_LOOP( '', ( #4220, #4221, #4222, #4223 ) )
#1589 = AXIS2_PLACEMENT_3D( '', #4224, #4225, #4226 )
#1590 = EDGE_LOOP( '', ( #4227, #4228, #4229, #4230 ) )
#1591 = AXIS2_PLACEMENT_3D( '', #4231, #4232, #4233 )
#1592 = EDGE_LOOP( '', ( #4234, #4235, #4236, #4237 ) )
#1593 = AXIS2_PLACEMENT_3D( '', #4238, #4239, #4240 )
#1594 = EDGE_LOOP( '', ( #4241, #4242, #4243, #4244 ) )
#1595 = AXIS2_PLACEMENT_3D( '', #4245, #4246, #4247 )
#1596 = EDGE_LOOP( '', ( #4248, #4249, #4250, #4251 ) )
#1597 = AXIS2_PLACEMENT_3D( '', #4252, #4253, #4254 )
#1598 = EDGE_LOOP( '', ( #4255, #4256, #4257, #4258 ) )
#1599 = AXIS2_PLACEMENT_3D( '', #4259, #4260, #4261 )
#1600 = ORIENTED_EDGE( '', *, *, #4262, .F. )
#1601 = ORIENTED_EDGE( '', *, *, #4263, .T. )
#1602 = ORIENTED_EDGE( '', *, *, #4264, .T. )
#1603 = ORIENTED_EDGE( '', *, *, #4265, .T. )
#1604 = ORIENTED_EDGE( '', *, *, #4266, .T. )
#1605 = ORIENTED_EDGE( '', *, *, #4267, .T. )
#1606 = ORIENTED_EDGE( '', *, *, #4268, .T. )
#1607 = ORIENTED_EDGE( '', *, *, #4269, .T. )
#1608 = ORIENTED_EDGE( '', *, *, #4270, .T. )
#1609 = ORIENTED_EDGE( '', *, *, #4271, .T. )
#1610 = ORIENTED_EDGE( '', *, *, #4272, .F. )
#1611 = ORIENTED_EDGE( '', *, *, #4273, .F. )
#1612 = ORIENTED_EDGE( '', *, *, #4274, .F. )
#1613 = ORIENTED_EDGE( '', *, *, #4275, .T. )
#1614 = ORIENTED_EDGE( '', *, *, #4276, .F. )
#1615 = ORIENTED_EDGE( '', *, *, #4277, .F. )
#1616 = ORIENTED_EDGE( '', *, *, #4278, .T. )
#1617 = ORIENTED_EDGE( '', *, *, #4279, .T. )
#1618 = ORIENTED_EDGE( '', *, *, #4280, .T. )
#1619 = ORIENTED_EDGE( '', *, *, #4281, .F. )
#1620 = ORIENTED_EDGE( '', *, *, #4282, .T. )
#1621 = ORIENTED_EDGE( '', *, *, #4283, .T. )
#1622 = ORIENTED_EDGE( '', *, *, #4284, .T. )
#1623 = ORIENTED_EDGE( '', *, *, #4285, .F. )
#1624 = ORIENTED_EDGE( '', *, *, #4286, .F. )
#1625 = ORIENTED_EDGE( '', *, *, #4287, .T. )
#1626 = ORIENTED_EDGE( '', *, *, #4288, .F. )
#1627 = ORIENTED_EDGE( '', *, *, #4289, .F. )
#1628 = ORIENTED_EDGE( '', *, *, #4290, .F. )
#1629 = ORIENTED_EDGE( '', *, *, #4291, .T. )
#1630 = ORIENTED_EDGE( '', *, *, #4292, .T. )
#1631 = ORIENTED_EDGE( '', *, *, #4293, .T. )
#1632 = ORIENTED_EDGE( '', *, *, #4294, .F. )
#1633 = ORIENTED_EDGE( '', *, *, #4295, .T. )
#1634 = ORIENTED_EDGE( '', *, *, #4296, .T. )
#1635 = ORIENTED_EDGE( '', *, *, #4297, .T. )
#1636 = ORIENTED_EDGE( '', *, *, #4298, .T. )
#1637 = ORIENTED_EDGE( '', *, *, #4299, .T. )
#1638 = ORIENTED_EDGE( '', *, *, #4300, .T. )
#1639 = ORIENTED_EDGE( '', *, *, #4301, .T. )
#1640 = ORIENTED_EDGE( '', *, *, #4302, .T. )
#1641 = ORIENTED_EDGE( '', *, *, #4303, .T. )
#1642 = ORIENTED_EDGE( '', *, *, #4304, .T. )
#1643 = ORIENTED_EDGE( '', *, *, #4305, .T. )
#1644 = ORIENTED_EDGE( '', *, *, #4306, .T. )
#1645 = ORIENTED_EDGE( '', *, *, #4307, .T. )
#1646 = ORIENTED_EDGE( '', *, *, #4308, .T. )
#1647 = ORIENTED_EDGE( '', *, *, #4309, .T. )
#1648 = ORIENTED_EDGE( '', *, *, #4310, .T. )
#1649 = ORIENTED_EDGE( '', *, *, #4311, .T. )
#1650 = ORIENTED_EDGE( '', *, *, #4312, .T. )
#1651 = ORIENTED_EDGE( '', *, *, #4313, .T. )
#1652 = ORIENTED_EDGE( '', *, *, #4314, .T. )
#1653 = ORIENTED_EDGE( '', *, *, #4315, .T. )
#1654 = ORIENTED_EDGE( '', *, *, #4316, .T. )
#1655 = ORIENTED_EDGE( '', *, *, #4317, .T. )
#1656 = ORIENTED_EDGE( '', *, *, #4318, .T. )
#1657 = ORIENTED_EDGE( '', *, *, #4319, .T. )
#1658 = ORIENTED_EDGE( '', *, *, #4320, .T. )
#1659 = ORIENTED_EDGE( '', *, *, #4321, .T. )
#1660 = ORIENTED_EDGE( '', *, *, #4322, .T. )
#1661 = ORIENTED_EDGE( '', *, *, #4323, .T. )
#1662 = ORIENTED_EDGE( '', *, *, #4324, .T. )
#1663 = ORIENTED_EDGE( '', *, *, #4325, .T. )
#1664 = ORIENTED_EDGE( '', *, *, #4326, .T. )
#1665 = ORIENTED_EDGE( '', *, *, #4327, .T. )
#1666 = ORIENTED_EDGE( '', *, *, #4328, .T. )
#1667 = ORIENTED_EDGE( '', *, *, #4329, .T. )
#1668 = ORIENTED_EDGE( '', *, *, #4330, .T. )
#1669 = ORIENTED_EDGE( '', *, *, #4331, .T. )
#1670 = ORIENTED_EDGE( '', *, *, #4332, .T. )
#1671 = ORIENTED_EDGE( '', *, *, #4333, .T. )
#1672 = ORIENTED_EDGE( '', *, *, #4334, .T. )
#1673 = ORIENTED_EDGE( '', *, *, #4335, .T. )
#1674 = ORIENTED_EDGE( '', *, *, #4336, .T. )
#1675 = ORIENTED_EDGE( '', *, *, #4337, .T. )
#1676 = ORIENTED_EDGE( '', *, *, #4338, .T. )
#1677 = ORIENTED_EDGE( '', *, *, #4339, .T. )
#1678 = ORIENTED_EDGE( '', *, *, #4340, .T. )
#1679 = ORIENTED_EDGE( '', *, *, #4341, .T. )
#1680 = ORIENTED_EDGE( '', *, *, #4342, .T. )
#1681 = ORIENTED_EDGE( '', *, *, #4343, .T. )
#1682 = ORIENTED_EDGE( '', *, *, #4344, .T. )
#1683 = ORIENTED_EDGE( '', *, *, #4345, .T. )
#1684 = ORIENTED_EDGE( '', *, *, #4346, .T. )
#1685 = ORIENTED_EDGE( '', *, *, #4347, .T. )
#1686 = ORIENTED_EDGE( '', *, *, #4348, .T. )
#1687 = ORIENTED_EDGE( '', *, *, #4349, .T. )
#1688 = ORIENTED_EDGE( '', *, *, #4350, .F. )
#1689 = ORIENTED_EDGE( '', *, *, #4351, .T. )
#1690 = ORIENTED_EDGE( '', *, *, #4352, .T. )
#1691 = ORIENTED_EDGE( '', *, *, #4353, .T. )
#1692 = ORIENTED_EDGE( '', *, *, #4354, .T. )
#1693 = ORIENTED_EDGE( '', *, *, #4355, .F. )
#1694 = ORIENTED_EDGE( '', *, *, #4356, .T. )
#1695 = ORIENTED_EDGE( '', *, *, #4357, .T. )
#1696 = ORIENTED_EDGE( '', *, *, #4358, .T. )
#1697 = ORIENTED_EDGE( '', *, *, #4359, .T. )
#1698 = ORIENTED_EDGE( '', *, *, #4360, .T. )
#1699 = ORIENTED_EDGE( '', *, *, #4361, .T. )
#1700 = ORIENTED_EDGE( '', *, *, #4362, .T. )
#1701 = ORIENTED_EDGE( '', *, *, #4363, .T. )
#1702 = ORIENTED_EDGE( '', *, *, #4364, .T. )
#1703 = ORIENTED_EDGE( '', *, *, #4365, .T. )
#1704 = ORIENTED_EDGE( '', *, *, #4366, .T. )
#1705 = ORIENTED_EDGE( '', *, *, #4367, .T. )
#1706 = ORIENTED_EDGE( '', *, *, #4368, .T. )
#1707 = ORIENTED_EDGE( '', *, *, #4369, .T. )
#1708 = ORIENTED_EDGE( '', *, *, #4370, .T. )
#1709 = ORIENTED_EDGE( '', *, *, #4371, .T. )
#1710 = ORIENTED_EDGE( '', *, *, #4372, .T. )
#1711 = ORIENTED_EDGE( '', *, *, #4373, .T. )
#1712 = ORIENTED_EDGE( '', *, *, #4374, .T. )
#1713 = ORIENTED_EDGE( '', *, *, #4375, .T. )
#1714 = ORIENTED_EDGE( '', *, *, #4376, .T. )
#1715 = ORIENTED_EDGE( '', *, *, #4377, .T. )
#1716 = ORIENTED_EDGE( '', *, *, #4378, .T. )
#1717 = ORIENTED_EDGE( '', *, *, #4379, .T. )
#1718 = ORIENTED_EDGE( '', *, *, #4380, .T. )
#1719 = ORIENTED_EDGE( '', *, *, #4381, .T. )
#1720 = ORIENTED_EDGE( '', *, *, #4382, .T. )
#1721 = ORIENTED_EDGE( '', *, *, #4383, .T. )
#1722 = ORIENTED_EDGE( '', *, *, #4384, .T. )
#1723 = ORIENTED_EDGE( '', *, *, #4385, .T. )
#1724 = ORIENTED_EDGE( '', *, *, #4386, .T. )
#1725 = ORIENTED_EDGE( '', *, *, #4387, .T. )
#1726 = ORIENTED_EDGE( '', *, *, #4388, .T. )
#1727 = ORIENTED_EDGE( '', *, *, #4389, .T. )
#1728 = ORIENTED_EDGE( '', *, *, #4390, .T. )
#1729 = ORIENTED_EDGE( '', *, *, #4391, .T. )
#1730 = ORIENTED_EDGE( '', *, *, #4392, .T. )
#1731 = ORIENTED_EDGE( '', *, *, #4393, .T. )
#1732 = ORIENTED_EDGE( '', *, *, #4394, .T. )
#1733 = ORIENTED_EDGE( '', *, *, #4395, .T. )
#1734 = ORIENTED_EDGE( '', *, *, #4396, .T. )
#1735 = ORIENTED_EDGE( '', *, *, #4397, .T. )
#1736 = ORIENTED_EDGE( '', *, *, #4398, .T. )
#1737 = ORIENTED_EDGE( '', *, *, #4399, .T. )
#1738 = ORIENTED_EDGE( '', *, *, #4400, .T. )
#1739 = ORIENTED_EDGE( '', *, *, #4401, .T. )
#1740 = ORIENTED_EDGE( '', *, *, #4402, .T. )
#1741 = ORIENTED_EDGE( '', *, *, #4403, .T. )
#1742 = ORIENTED_EDGE( '', *, *, #4404, .T. )
#1743 = ORIENTED_EDGE( '', *, *, #4405, .T. )
#1744 = ORIENTED_EDGE( '', *, *, #4406, .T. )
#1745 = ORIENTED_EDGE( '', *, *, #4407, .T. )
#1746 = ORIENTED_EDGE( '', *, *, #4408, .T. )
#1747 = ORIENTED_EDGE( '', *, *, #4409, .T. )
#1748 = ORIENTED_EDGE( '', *, *, #4410, .F. )
#1749 = ORIENTED_EDGE( '', *, *, #4411, .F. )
#1750 = ORIENTED_EDGE( '', *, *, #4412, .T. )
#1751 = ORIENTED_EDGE( '', *, *, #4413, .F. )
#1752 = ORIENTED_EDGE( '', *, *, #4414, .F. )
#1753 = ORIENTED_EDGE( '', *, *, #4415, .F. )
#1754 = ORIENTED_EDGE( '', *, *, #4416, .F. )
#1755 = ORIENTED_EDGE( '', *, *, #4417, .F. )
#1756 = ORIENTED_EDGE( '', *, *, #4418, .F. )
#1757 = ORIENTED_EDGE( '', *, *, #4419, .F. )
#1758 = ORIENTED_EDGE( '', *, *, #4420, .F. )
#1759 = ORIENTED_EDGE( '', *, *, #4421, .F. )
#1760 = ORIENTED_EDGE( '', *, *, #4422, .F. )
#1761 = ORIENTED_EDGE( '', *, *, #4423, .F. )
#1762 = ORIENTED_EDGE( '', *, *, #4424, .F. )
#1763 = ORIENTED_EDGE( '', *, *, #4425, .F. )
#1764 = ORIENTED_EDGE( '', *, *, #4426, .F. )
#1765 = ORIENTED_EDGE( '', *, *, #4427, .F. )
#1766 = ORIENTED_EDGE( '', *, *, #4428, .F. )
#1767 = ORIENTED_EDGE( '', *, *, #4429, .F. )
#1768 = ORIENTED_EDGE( '', *, *, #4430, .F. )
#1769 = ORIENTED_EDGE( '', *, *, #4431, .F. )
#1770 = ORIENTED_EDGE( '', *, *, #4432, .F. )
#1771 = ORIENTED_EDGE( '', *, *, #4433, .F. )
#1772 = ORIENTED_EDGE( '', *, *, #4434, .F. )
#1773 = ORIENTED_EDGE( '', *, *, #4435, .F. )
#1774 = ORIENTED_EDGE( '', *, *, #4436, .F. )
#1775 = ORIENTED_EDGE( '', *, *, #4437, .F. )
#1776 = ORIENTED_EDGE( '', *, *, #4438, .F. )
#1777 = ORIENTED_EDGE( '', *, *, #4439, .F. )
#1778 = ORIENTED_EDGE( '', *, *, #4440, .F. )
#1779 = ORIENTED_EDGE( '', *, *, #4441, .F. )
#1780 = ORIENTED_EDGE( '', *, *, #4442, .F. )
#1781 = ORIENTED_EDGE( '', *, *, #4443, .F. )
#1782 = ORIENTED_EDGE( '', *, *, #4444, .F. )
#1783 = ORIENTED_EDGE( '', *, *, #4445, .F. )
#1784 = ORIENTED_EDGE( '', *, *, #4446, .F. )
#1785 = ORIENTED_EDGE( '', *, *, #4447, .F. )
#1786 = ORIENTED_EDGE( '', *, *, #4448, .F. )
#1787 = ORIENTED_EDGE( '', *, *, #4449, .F. )
#1788 = ORIENTED_EDGE( '', *, *, #4450, .F. )
#1789 = ORIENTED_EDGE( '', *, *, #4451, .F. )
#1790 = ORIENTED_EDGE( '', *, *, #4452, .F. )
#1791 = ORIENTED_EDGE( '', *, *, #4453, .F. )
#1792 = ORIENTED_EDGE( '', *, *, #4454, .F. )
#1793 = ORIENTED_EDGE( '', *, *, #4455, .F. )
#1794 = ORIENTED_EDGE( '', *, *, #4456, .F. )
#1795 = ORIENTED_EDGE( '', *, *, #4457, .F. )
#1796 = ORIENTED_EDGE( '', *, *, #4458, .T. )
#1797 = ORIENTED_EDGE( '', *, *, #4459, .T. )
#1798 = ORIENTED_EDGE( '', *, *, #4460, .T. )
#1799 = ORIENTED_EDGE( '', *, *, #4461, .T. )
#1800 = ORIENTED_EDGE( '', *, *, #4462, .T. )
#1801 = ORIENTED_EDGE( '', *, *, #4463, .F. )
#1802 = ORIENTED_EDGE( '', *, *, #4464, .T. )
#1803 = ORIENTED_EDGE( '', *, *, #4465, .T. )
#1804 = ORIENTED_EDGE( '', *, *, #4466, .T. )
#1805 = ORIENTED_EDGE( '', *, *, #4467, .T. )
#1806 = ORIENTED_EDGE( '', *, *, #4468, .F. )
#1807 = ORIENTED_EDGE( '', *, *, #4469, .T. )
#1808 = ORIENTED_EDGE( '', *, *, #4470, .T. )
#1809 = ORIENTED_EDGE( '', *, *, #4471, .T. )
#1810 = ORIENTED_EDGE( '', *, *, #4472, .T. )
#1811 = ORIENTED_EDGE( '', *, *, #4473, .T. )
#1812 = ORIENTED_EDGE( '', *, *, #4474, .F. )
#1813 = ORIENTED_EDGE( '', *, *, #4475, .F. )
#1814 = ORIENTED_EDGE( '', *, *, #4476, .F. )
#1815 = ORIENTED_EDGE( '', *, *, #4477, .F. )
#1816 = ORIENTED_EDGE( '', *, *, #4478, .F. )
#1817 = ORIENTED_EDGE( '', *, *, #4479, .F. )
#1818 = ORIENTED_EDGE( '', *, *, #4480, .F. )
#1819 = ORIENTED_EDGE( '', *, *, #4481, .F. )
#1820 = ORIENTED_EDGE( '', *, *, #4482, .F. )
#1821 = ORIENTED_EDGE( '', *, *, #4483, .F. )
#1822 = ORIENTED_EDGE( '', *, *, #4484, .F. )
#1823 = ORIENTED_EDGE( '', *, *, #4485, .F. )
#1824 = ORIENTED_EDGE( '', *, *, #4486, .F. )
#1825 = ORIENTED_EDGE( '', *, *, #4487, .F. )
#1826 = ORIENTED_EDGE( '', *, *, #4488, .F. )
#1827 = ORIENTED_EDGE( '', *, *, #4489, .F. )
#1828 = ORIENTED_EDGE( '', *, *, #4490, .F. )
#1829 = ORIENTED_EDGE( '', *, *, #4491, .F. )
#1830 = ORIENTED_EDGE( '', *, *, #4492, .F. )
#1831 = ORIENTED_EDGE( '', *, *, #4493, .F. )
#1832 = ORIENTED_EDGE( '', *, *, #4494, .F. )
#1833 = ORIENTED_EDGE( '', *, *, #4495, .F. )
#1834 = ORIENTED_EDGE( '', *, *, #4496, .F. )
#1835 = ORIENTED_EDGE( '', *, *, #4497, .F. )
#1836 = ORIENTED_EDGE( '', *, *, #4498, .F. )
#1837 = ORIENTED_EDGE( '', *, *, #4499, .F. )
#1838 = ORIENTED_EDGE( '', *, *, #4500, .F. )
#1839 = ORIENTED_EDGE( '', *, *, #4501, .F. )
#1840 = ORIENTED_EDGE( '', *, *, #4502, .F. )
#1841 = ORIENTED_EDGE( '', *, *, #4503, .F. )
#1842 = ORIENTED_EDGE( '', *, *, #4504, .F. )
#1843 = ORIENTED_EDGE( '', *, *, #4505, .F. )
#1844 = ORIENTED_EDGE( '', *, *, #4506, .F. )
#1845 = ORIENTED_EDGE( '', *, *, #4507, .F. )
#1846 = ORIENTED_EDGE( '', *, *, #4508, .F. )
#1847 = ORIENTED_EDGE( '', *, *, #4509, .F. )
#1848 = ORIENTED_EDGE( '', *, *, #4510, .F. )
#1849 = ORIENTED_EDGE( '', *, *, #4511, .F. )
#1850 = ORIENTED_EDGE( '', *, *, #4512, .F. )
#1851 = ORIENTED_EDGE( '', *, *, #4513, .F. )
#1852 = ORIENTED_EDGE( '', *, *, #4514, .F. )
#1853 = ORIENTED_EDGE( '', *, *, #4515, .F. )
#1854 = ORIENTED_EDGE( '', *, *, #4516, .F. )
#1855 = ORIENTED_EDGE( '', *, *, #4517, .F. )
#1856 = ORIENTED_EDGE( '', *, *, #4518, .F. )
#1857 = ORIENTED_EDGE( '', *, *, #4519, .T. )
#1858 = ORIENTED_EDGE( '', *, *, #4520, .F. )
#1859 = ORIENTED_EDGE( '', *, *, #4521, .F. )
#1860 = ORIENTED_EDGE( '', *, *, #4522, .F. )
#1861 = ORIENTED_EDGE( '', *, *, #4523, .F. )
#1862 = ORIENTED_EDGE( '', *, *, #4524, .F. )
#1863 = ORIENTED_EDGE( '', *, *, #4525, .F. )
#1864 = ORIENTED_EDGE( '', *, *, #4526, .F. )
#1865 = ORIENTED_EDGE( '', *, *, #4527, .F. )
#1866 = ORIENTED_EDGE( '', *, *, #4528, .T. )
#1867 = ORIENTED_EDGE( '', *, *, #4529, .T. )
#1868 = ORIENTED_EDGE( '', *, *, #4530, .T. )
#1869 = ORIENTED_EDGE( '', *, *, #4531, .F. )
#1870 = ORIENTED_EDGE( '', *, *, #4532, .T. )
#1871 = ORIENTED_EDGE( '', *, *, #4533, .T. )
#1872 = ORIENTED_EDGE( '', *, *, #4534, .T. )
#1873 = ORIENTED_EDGE( '', *, *, #4535, .F. )
#1874 = ORIENTED_EDGE( '', *, *, #4536, .F. )
#1875 = ORIENTED_EDGE( '', *, *, #4537, .T. )
#1876 = ORIENTED_EDGE( '', *, *, #4538, .T. )
#1877 = ORIENTED_EDGE( '', *, *, #4539, .T. )
#1878 = ORIENTED_EDGE( '', *, *, #4540, .F. )
#1879 = ORIENTED_EDGE( '', *, *, #4541, .T. )
#1880 = ORIENTED_EDGE( '', *, *, #4542, .T. )
#1881 = ORIENTED_EDGE( '', *, *, #4543, .T. )
#1882 = ORIENTED_EDGE( '', *, *, #4544, .F. )
#1883 = ORIENTED_EDGE( '', *, *, #4545, .F. )
#1884 = ORIENTED_EDGE( '', *, *, #4546, .T. )
#1885 = ORIENTED_EDGE( '', *, *, #4547, .T. )
#1886 = ORIENTED_EDGE( '', *, *, #4548, .T. )
#1887 = ORIENTED_EDGE( '', *, *, #4549, .F. )
#1888 = CARTESIAN_POINT( '', ( -79.4177471747059, 105.905777007040, 0.000000000000000 ) )
#1889 = DIRECTION( '', ( 0.000000000000000, 0.000000000000000, 1.00000000000000 ) )
#1890 = DIRECTION( '', ( 1.00000000000000, 0.000000000000000, 0.000000000000000 ) )
#1891 = ORIENTED_EDGE( '', *, *, #4268, .F. )
#1892 = ORIENTED_EDGE( '', *, *, #4550, .T. )
#1893 = ORIENTED_EDGE( '', *, *, #4551, .T. )
#1894 = ORIENTED_EDGE( '', *, *, #4552, .T. )
#1895 = CARTESIAN_POINT( '', ( -79.4177471747059, 105.905777007040, -2.50000000000000 ) )
#1896 = DIRECTION( '', ( -1.00000000000000, 0.000000000000000, 0.000000000000000 ) )
#1897 = DIRECTION( '', ( 0.000000000000000, 0.000000000000000, 1.00000000000000 ) )
#1898 = ORIENTED_EDGE( '', *, *, #4553, .T. )
#1899 = ORIENTED_EDGE( '', *, *, #4262, .T. )
#1900 = ORIENTED_EDGE( '', *, *, #4554, .T. )
#1901 = ORIENTED_EDGE( '', *, *, #4555, .T. )
#1902 = CARTESIAN_POINT( '', ( -94.9899861954822, 20.1557770070405, 171.117387115817 ) )
#1903 = DIRECTION( '', ( 0.000000000000000, 1.00000000000000, 0.000000000000000 ) )
#1904 = DIRECTION( '', ( 0.000000000000000, 0.000000000000000, 1.00000000000000 ) )
#1905 = ORIENTED_EDGE( '', *, *, #4556, .T. )
#1906 = ORIENTED_EDGE( '', *, *, #4555, .F. )
#1907 = ORIENTED_EDGE( '', *, *, #4557, .T. )
#1908 = ORIENTED_EDGE( '', *, *, #4551, .F. )
#1909 = ORIENTED_EDGE( '', *, *, #4558, .T. )
#1910 = ORIENTED_EDGE( '', *, *, #4559, .T. )
#1911 = ORIENTED_EDGE( '', *, *, #4560, .T. )
#1912 = ORIENTED_EDGE( '', *, *, #4561, .F. )
#1913 = CARTESIAN_POINT( '', ( -79.4177471747059, 105.905777007040, -2.50000000000000 ) )
#1914 = DIRECTION( '', ( 0.000000000000000, 0.000000000000000, 1.00000000000000 ) )
#1915 = DIRECTION( '', ( 1.00000000000000, 0.000000000000000, 0.000000000000000 ) )
#1916 = ORIENTED_EDGE( '', *, *, #4554, .F. )
#1917 = ORIENTED_EDGE( '', *, *, #4269, .F. )
#1918 = ORIENTED_EDGE( '', *, *, #4552, .F. )
#1919 = ORIENTED_EDGE( '', *, *, #4557, .F. )
#1920 = CARTESIAN_POINT( '', ( -76.4177471747059, 22.9057770070404, -2.50000000000000 ) )
#1921 = DIRECTION( '', ( 0.000000000000000, 0.000000000000000, -1.00000000000000 ) )
#1922 = DIRECTION( '', ( 1.00000000000000, 0.000000000000000, 0.000000000000000 ) )
#1923 = ORIENTED_EDGE( '', *, *, #4267, .F. )
#1924 = ORIENTED_EDGE( '', *, *, #4562, .T. )
#1925 = ORIENTED_EDGE( '', *, *, #4558, .F. )
#1926 = ORIENTED_EDGE( '', *, *, #4550, .F. )
#1927 = CARTESIAN_POINT( '', ( -76.4177471747059, 102.905777007040, -2.50000000000000 ) )
#1928 = DIRECTION( '', ( 0.000000000000000, 0.000000000000000, -1.00000000000000 ) )
#1929 = DIRECTION( '', ( 1.00000000000000, 0.000000000000000, 0.000000000000000 ) )
#1930 = ORIENTED_EDGE( '', *, *, #4353, .F. )
#1931 = ORIENTED_EDGE( '', *, *, #4563, .F. )
#1932 = ORIENTED_EDGE( '', *, *, #4564, .T. )
#1933 = ORIENTED_EDGE( '', *, *, #4565, .T. )
#1934 = CARTESIAN_POINT( '', ( -62.4336242564300, 49.2807770070403, 0.200000000000000 ) )
#1935 = DIRECTION( '', ( -0.707551533103332, -0.706661749356171, 0.000000000000000 ) )
#1936 = DIRECTION( '', ( -0.706661749356171, 0.707551533103332, 0.000000000000000 ) )
#1937 = ORIENTED_EDGE( '', *, *, #4354, .F. )
#1938 = ORIENTED_EDGE( '', *, *, #4565, .F. )
#1939 = ORIENTED_EDGE( '', *, *, #4566, .T. )
#1940 = ORIENTED_EDGE( '', *, *, #4567, .T. )
#1941 = CARTESIAN_POINT( '', ( -62.4336242564300, 49.2807770070403, 0.200000000000000 ) )
#1942 = DIRECTION( '', ( 8.10983225019140E-014, -1.00000000000000, 0.000000000000000 ) )
#1943 = DIRECTION( '', ( 0.000000000000000, 0.000000000000000, -1.00000000000000 ) )
#1944 = ORIENTED_EDGE( '', *, *, #4568, .T. )
#1945 = ORIENTED_EDGE( '', *, *, #4355, .T. )
#1946 = ORIENTED_EDGE( '', *, *, #4567, .F. )
#1947 = ORIENTED_EDGE( '', *, *, #4569, .T. )
#1948 = ORIENTED_EDGE( '', *, *, #4570, .T. )
#1949 = CARTESIAN_POINT( '', ( -66.9177471747059, 49.4057770070401, 0.500000000000000 ) )
#1950 = DIRECTION( '', ( 0.000000000000000, 0.000000000000000, 1.00000000000000 ) )
#1951 = DIRECTION( '', ( -1.00000000000000, 0.000000000000000, 0.000000000000000 ) )
#1952 = ORIENTED_EDGE( '', *, *, #4356, .F. )
#1953 = ORIENTED_EDGE( '', *, *, #4568, .F. )
#1954 = ORIENTED_EDGE( '', *, *, #4571, .T. )
#1955 = ORIENTED_EDGE( '', *, *, #4572, .T. )
#1956 = CARTESIAN_POINT( '', ( -66.4336242564300, 49.5307770070402, 0.200000000000000 ) )
#1957 = DIRECTION( '', ( 2.89877060032334E-066, 1.00000000000000, 6.09376271466247E-027 ) )
#1958 = DIRECTION( '', ( 1.00000000000000, 0.000000000000000, -4.75694695717061E-040 ) )
#1959 = ORIENTED_EDGE( '', *, *, #4357, .F. )
#1960 = ORIENTED_EDGE( '', *, *, #4572, .F. )
#1961 = ORIENTED_EDGE( '', *, *, #4573, .T. )
#1962 = ORIENTED_EDGE( '', *, *, #4574, .T. )
#1963 = CARTESIAN_POINT( '', ( -62.4336242564300, 49.2940521936636, 0.200000000000000 ) )
#1964 = DIRECTION( '', ( 0.000000000000000, 0.000000000000000, 1.00000000000000 ) )
#1965 = DIRECTION( '', ( -1.00000000000000, 0.000000000000000, 0.000000000000000 ) )
#1966 = ORIENTED_EDGE( '', *, *, #4575, .F. )
#1967 = ORIENTED_EDGE( '', *, *, #4576, .T. )
#1968 = ORIENTED_EDGE( '', *, *, #4577, .F. )
#1969 = ORIENTED_EDGE( '', *, *, #4578, .F. )
#1970 = ORIENTED_EDGE( '', *, *, #4579, .F. )
#1971 = ORIENTED_EDGE( '', *, *, #4580, .T. )
#1972 = ORIENTED_EDGE( '', *, *, #4581, .F. )
#1973 = ORIENTED_EDGE( '', *, *, #4582, .F. )
#1974 = ORIENTED_EDGE( '', *, *, #4583, .F. )
#1975 = ORIENTED_EDGE( '', *, *, #4584, .F. )
#1976 = ORIENTED_EDGE( '', *, *, #4585, .F. )
#1977 = ORIENTED_EDGE( '', *, *, #4586, .F. )
#1978 = ORIENTED_EDGE( '', *, *, #4587, .F. )
#1979 = ORIENTED_EDGE( '', *, *, #4588, .F. )
#1980 = ORIENTED_EDGE( '', *, *, #4589, .F. )
#1981 = ORIENTED_EDGE( '', *, *, #4590, .F. )
#1982 = ORIENTED_EDGE( '', *, *, #4591, .F. )
#1983 = ORIENTED_EDGE( '', *, *, #4592, .F. )
#1984 = ORIENTED_EDGE( '', *, *, #4593, .F. )
#1985 = ORIENTED_EDGE( '', *, *, #4594, .F. )
#1986 = ORIENTED_EDGE( '', *, *, #4595, .F. )
#1987 = ORIENTED_EDGE( '', *, *, #4596, .F. )
#1988 = ORIENTED_EDGE( '', *, *, #4597, .F. )
#1989 = ORIENTED_EDGE( '', *, *, #4598, .F. )
#1990 = ORIENTED_EDGE( '', *, *, #4599, .F. )
#1991 = ORIENTED_EDGE( '', *, *, #4600, .F. )
#1992 = ORIENTED_EDGE( '', *, *, #4601, .F. )
#1993 = ORIENTED_EDGE( '', *, *, #4602, .F. )
#1994 = ORIENTED_EDGE( '', *, *, #4603, .F. )
#1995 = ORIENTED_EDGE( '', *, *, #4604, .F. )
#1996 = ORIENTED_EDGE( '', *, *, #4605, .F. )
#1997 = ORIENTED_EDGE( '', *, *, #4606, .F. )
#1998 = ORIENTED_EDGE( '', *, *, #4607, .F. )
#1999 = ORIENTED_EDGE( '', *, *, #4608, .F. )
#2000 = ORIENTED_EDGE( '', *, *, #4609, .F. )
#2001 = ORIENTED_EDGE( '', *, *, #4610, .F. )
#2002 = ORIENTED_EDGE( '', *, *, #4611, .F. )
#2003 = ORIENTED_EDGE( '', *, *, #4612, .F. )
#2004 = ORIENTED_EDGE( '', *, *, #4613, .F. )
#2005 = ORIENTED_EDGE( '', *, *, #4614, .F. )
#2006 = ORIENTED_EDGE( '', *, *, #4615, .F. )
#2007 = ORIENTED_EDGE( '', *, *, #4616, .F. )
#2008 = ORIENTED_EDGE( '', *, *, #4617, .F. )
#2009 = ORIENTED_EDGE( '', *, *, #4618, .F. )
#2010 = ORIENTED_EDGE( '', *, *, #4619, .F. )
#2011 = ORIENTED_EDGE( '', *, *, #4620, .F. )
[truncated: 8,089 more rows]
