# Supplementary material for: Microfluidics on liquid handling stations (μF-on-LHS): an industry compatible chip interface between microfluidics and automated liquid handling stations
Source: Royal Society of Chemistry journal article supplement (doi:10.1039/c3lc00042g), 2013-01-01
Supplement: c3lc00042g_5.stp [file c3lc00042g_5.stp]

ISO-10303-21
HEADER
FILE_DESCRIPTION( ( 'Unknown' ), '1' )
FILE_NAME( 'W:/Arbeitsbackup20121130/Projekt 10-871/_ISO_Projektmanagement/Fach24_CAD/Pipettierroboter/spacer.stp', 'Unknown', ( 'Unknown' ), ( 'Unknown' ), 'XStep 1.0', 'Unknown', ' ' )
FILE_SCHEMA( ( 'CONFIG_CONTROL_DESIGN' ) )
ENDSEC
DATA
#1 = DESIGN_CONTEXT( '', #27, 'design' )
#2 = APPLICATION_PROTOCOL_DEFINITION( 'INTERNATIONAL STANDARD', 'config_control_design', 1994, #27 )
#3 = PRODUCT_CATEGORY_RELATIONSHIP( 'NONE', 'NONE', #28, #29 )
#4 = DATE_AND_TIME( #30, #31 )
#5 = DATE_TIME_ROLE( 'creation_date' )
#6 = DATE_TIME_ROLE( 'classification_date' )
#7 = PERSON_AND_ORGANIZATION_ROLE( 'creator' )
#8 = PERSON_AND_ORGANIZATION_ROLE( 'design_supplier' )
#9 = PERSON_AND_ORGANIZATION_ROLE( 'classification_officer' )
#10 = PERSON_AND_ORGANIZATION_ROLE( 'design_owner' )
#11 = APPROVAL_PERSON_ORGANIZATION( #32, #33, #34 )
#12 = APPROVAL_DATE_TIME( #4, #33 )
#13 = CC_DESIGN_APPROVAL( #33, ( #35, #36, #37 ) )
#14 = CC_DESIGN_DATE_AND_TIME_ASSIGNMENT( #4, #5, ( #37 ) )
#15 = CC_DESIGN_DATE_AND_TIME_ASSIGNMENT( #4, #6, ( #35 ) )
#16 = CC_DESIGN_PERSON_AND_ORGANIZATION_ASSIGNMENT( #32, #10, ( #38 ) )
#17 = CC_DESIGN_PERSON_AND_ORGANIZATION_ASSIGNMENT( #32, #7, ( #37 ) )
#18 = CC_DESIGN_PERSON_AND_ORGANIZATION_ASSIGNMENT( #32, #7, ( #36 ) )
#19 = CC_DESIGN_PERSON_AND_ORGANIZATION_ASSIGNMENT( #32, #8, ( #36 ) )
#20 = CC_DESIGN_SECURITY_CLASSIFICATION( #35, ( #36 ) )
#21 = CC_DESIGN_PERSON_AND_ORGANIZATION_ASSIGNMENT( #32, #9, ( #35 ) )
#22 = SHAPE_DEFINITION_REPRESENTATION( #39, #40 )
#23 = ( GEOMETRIC_REPRESENTATION_CONTEXT( 3 )GLOBAL_UNCERTAINTY_ASSIGNED_CONTEXT( ( #43 ) )GLOBAL_UNIT_ASSIGNED_CONTEXT( ( #45, #46, #47 ) )REPRESENTATION_CONTEXT( 'NONE', 'WORKSPACE' ) )
#27 = APPLICATION_CONTEXT( 'CONFIGURATION CONTROLLED 3D DESIGNS OF MECHANICAL PARTS AND ASSEMBLIES' )
#28 = PRODUCT_CATEGORY( 'part', 'NONE' )
#29 = PRODUCT_RELATED_PRODUCT_CATEGORY( 'detail', ' ', ( #38 ) )
#30 = CALENDAR_DATE( 2012, 6, 11 )
#31 = LOCAL_TIME( 10, 20, 32.0000000000000, #49 )
#32 = PERSON_AND_ORGANIZATION( #50, #51 )
#33 = APPROVAL( #52, 'SOLID MODEL' )
#34 = APPROVAL_ROLE( 'APPROVED' )
#35 = SECURITY_CLASSIFICATION( '', '', #53 )
#36 = PRODUCT_DEFINITION_FORMATION_WITH_SPECIFIED_SOURCE( ' ', 'NONE', #38, .NOT_KNOWN. )
#37 = PRODUCT_DEFINITION( 'NONE', 'NONE', #36, #1 )
#38 = PRODUCT( '1', '1', 'PART-1-DESC', ( #54 ) )
#39 = PRODUCT_DEFINITION_SHAPE( 'NONE', 'NONE', #37 )
#40 = ADVANCED_BREP_SHAPE_REPRESENTATION( '1', ( #55, #56 ), #23 )
#43 = UNCERTAINTY_MEASURE_WITH_UNIT( LENGTH_MEASURE( 0.00100000000000000 ), #45, '', '' )
#45 = ( CONVERSION_BASED_UNIT( 'MILLIMETRE', #59 )LENGTH_UNIT( )NAMED_UNIT( #62 ) )
#46 = ( NAMED_UNIT( #64 )PLANE_ANGLE_UNIT( )SI_UNIT( $, .RADIAN. ) )
#47 = ( NAMED_UNIT( #64 )SOLID_ANGLE_UNIT( )SI_UNIT( $, .STERADIAN. ) )
#49 = COORDINATED_UNIVERSAL_TIME_OFFSET( 1, 0, .AHEAD. )
#50 = PERSON( '', 'UNSPECIFIED', $, $, $, $ )
#51 = ORGANIZATION( 'UNSPECIFIED', 'UNSPECIFIED', 'UNSPECIFIED' )
#52 = APPROVAL_STATUS( 'approved' )
#53 = SECURITY_CLASSIFICATION_LEVEL( 'unclassified' )
#54 = MECHANICAL_CONTEXT( '', #27, 'mechanical' )
#55 = MANIFOLD_SOLID_BREP( '1', #70 )
#56 = AXIS2_PLACEMENT_3D( '', #71, #72, #73 )
#59 = LENGTH_MEASURE_WITH_UNIT( LENGTH_MEASURE( 1.00000000000000 ), #74 )
#62 = DIMENSIONAL_EXPONENTS( 1.00000000000000, 0.000000000000000, 0.000000000000000, 0.000000000000000, 0.000000000000000, 0.000000000000000, 0.000000000000000 )
#64 = DIMENSIONAL_EXPONENTS( 0.000000000000000, 0.000000000000000, 0.000000000000000, 0.000000000000000, 0.000000000000000, 0.000000000000000, 0.000000000000000 )
#70 = CLOSED_SHELL( '', ( #75, #76, #77, #78, #79, #80, #81, #82, #83, #84, #85, #86, #87, #88, #89, #90, #91, #92 ) )
#71 = CARTESIAN_POINT( '', ( 0.000000000000000, 0.000000000000000, 0.000000000000000 ) )
#72 = DIRECTION( '', ( 0.000000000000000, 0.000000000000000, 1.00000000000000 ) )
#73 = DIRECTION( '', ( 1.00000000000000, 0.000000000000000, 0.000000000000000 ) )
#74 = ( NAMED_UNIT( #62 )LENGTH_UNIT( )SI_UNIT( .MILLI., .METRE. ) )
#75 = ADVANCED_FACE( '', ( #94, #95, #96, #97, #98, #99 ), #100, .T. )
#76 = ADVANCED_FACE( '', ( #101 ), #102, .F. )
#77 = ADVANCED_FACE( '', ( #103, #104, #105, #106, #107, #108 ), #109, .F. )
#78 = ADVANCED_FACE( '', ( #110 ), #111, .F. )
#79 = ADVANCED_FACE( '', ( #112 ), #113, .T. )
#80 = ADVANCED_FACE( '', ( #114 ), #115, .F. )
#81 = ADVANCED_FACE( '', ( #116 ), #117, .F. )
#82 = ADVANCED_FACE( '', ( #118, #119 ), #120, .F. )
#83 = ADVANCED_FACE( '', ( #121, #122 ), #123, .F. )
#84 = ADVANCED_FACE( '', ( #124, #125 ), #126, .F. )
#85 = ADVANCED_FACE( '', ( #127 ), #128, .T. )
#86 = ADVANCED_FACE( '', ( #129, #130 ), #131, .F. )
#87 = ADVANCED_FACE( '', ( #132 ), #133, .T. )
#88 = ADVANCED_FACE( '', ( #134 ), #135, .T. )
#89 = ADVANCED_FACE( '', ( #136 ), #137, .F. )
#90 = ADVANCED_FACE( '', ( #138 ), #139, .F. )
#91 = ADVANCED_FACE( '', ( #140 ), #141, .F. )
#92 = ADVANCED_FACE( '', ( #142 ), #143, .F. )
#94 = FACE_BOUND( '', #144, .T. )
#95 = FACE_BOUND( '', #145, .T. )
#96 = FACE_OUTER_BOUND( '', #146, .T. )
#97 = FACE_BOUND( '', #147, .T. )
#98 = FACE_BOUND( '', #148, .T. )
#99 = FACE_BOUND( '', #149, .T. )
#100 = PLANE( '', #150 )
#101 = FACE_OUTER_BOUND( '', #151, .T. )
#102 = PLANE( '', #152 )
#103 = FACE_BOUND( '', #153, .T. )
#104 = FACE_BOUND( '', #154, .T. )
#105 = FACE_BOUND( '', #155, .T. )
#106 = FACE_OUTER_BOUND( '', #156, .T. )
#107 = FACE_BOUND( '', #157, .T. )
#108 = FACE_BOUND( '', #158, .T. )
#109 = PLANE( '', #159 )
#110 = FACE_OUTER_BOUND( '', #160, .T. )
#111 = PLANE( '', #161 )
#112 = FACE_OUTER_BOUND( '', #162, .T. )
#113 = PLANE( '', #163 )
#114 = FACE_OUTER_BOUND( '', #164, .T. )
#115 = PLANE( '', #165 )
#116 = FACE_OUTER_BOUND( '', #166, .T. )
#117 = PLANE( '', #167 )
#118 = FACE_OUTER_BOUND( '', #168, .T. )
#119 = FACE_OUTER_BOUND( '', #169, .T. )
#120 = CYLINDRICAL_SURFACE( '', #170, 2.25000000000000 )
#121 = FACE_OUTER_BOUND( '', #171, .T. )
#122 = FACE_OUTER_BOUND( '', #172, .T. )
#123 = CYLINDRICAL_SURFACE( '', #173, 2.25000000000000 )
#124 = FACE_OUTER_BOUND( '', #174, .T. )
#125 = FACE_OUTER_BOUND( '', #175, .T. )
#126 = CYLINDRICAL_SURFACE( '', #176, 2.25000000000000 )
#127 = FACE_OUTER_BOUND( '', #177, .T. )
#128 = PLANE( '', #178 )
#129 = FACE_OUTER_BOUND( '', #179, .T. )
#130 = FACE_OUTER_BOUND( '', #180, .T. )
#131 = CYLINDRICAL_SURFACE( '', #181, 2.25000000000000 )
#132 = FACE_OUTER_BOUND( '', #182, .T. )
#133 = PLANE( '', #183 )
#134 = FACE_OUTER_BOUND( '', #184, .T. )
#135 = PLANE( '', #185 )
#136 = FACE_OUTER_BOUND( '', #186, .T. )
#137 = CYLINDRICAL_SURFACE( '', #187, 2.50000000000000 )
#138 = FACE_OUTER_BOUND( '', #188, .T. )
#139 = CYLINDRICAL_SURFACE( '', #189, 2.50000000000000 )
#140 = FACE_OUTER_BOUND( '', #190, .T. )
#141 = CYLINDRICAL_SURFACE( '', #191, 2.50000000000000 )
#142 = FACE_OUTER_BOUND( '', #192, .T. )
#143 = CYLINDRICAL_SURFACE( '', #193, 2.50000000000000 )
#144 = EDGE_LOOP( '', ( #194 ) )
#145 = EDGE_LOOP( '', ( #195 ) )
#146 = EDGE_LOOP( '', ( #196, #197, #198, #199 ) )
#147 = EDGE_LOOP( '', ( #200 ) )
#148 = EDGE_LOOP( '', ( #201 ) )
#149 = EDGE_LOOP( '', ( #202, #203, #204, #205, #206, #207, #208, #209 ) )
#150 = AXIS2_PLACEMENT_3D( '', #210, #211, #212 )
#151 = EDGE_LOOP( '', ( #213, #214, #215, #216 ) )
#152 = AXIS2_PLACEMENT_3D( '', #217, #218, #219 )
#153 = EDGE_LOOP( '', ( #220, #221, #222, #223, #224, #225, #226, #227 ) )
#154 = EDGE_LOOP( '', ( #228 ) )
#155 = EDGE_LOOP( '', ( #229 ) )
#156 = EDGE_LOOP( '', ( #230, #231, #232, #233 ) )
#157 = EDGE_LOOP( '', ( #234 ) )
#158 = EDGE_LOOP( '', ( #235 ) )
#159 = AXIS2_PLACEMENT_3D( '', #236, #237, #238 )
#160 = EDGE_LOOP( '', ( #239, #240, #241, #242 ) )
#161 = AXIS2_PLACEMENT_3D( '', #243, #244, #245 )
#162 = EDGE_LOOP( '', ( #246, #247, #248, #249 ) )
#163 = AXIS2_PLACEMENT_3D( '', #250, #251, #252 )
#164 = EDGE_LOOP( '', ( #253, #254, #255, #256 ) )
#165 = AXIS2_PLACEMENT_3D( '', #257, #258, #259 )
#166 = EDGE_LOOP( '', ( #260, #261, #262, #263 ) )
#167 = AXIS2_PLACEMENT_3D( '', #264, #265, #266 )
#168 = EDGE_LOOP( '', ( #267 ) )
#169 = EDGE_LOOP( '', ( #268 ) )
#170 = AXIS2_PLACEMENT_3D( '', #269, #270, #271 )
#171 = EDGE_LOOP( '', ( #272 ) )
#172 = EDGE_LOOP( '', ( #273 ) )
#173 = AXIS2_PLACEMENT_3D( '', #274, #275, #276 )
#174 = EDGE_LOOP( '', ( #277 ) )
#175 = EDGE_LOOP( '', ( #278 ) )
#176 = AXIS2_PLACEMENT_3D( '', #279, #280, #281 )
#177 = EDGE_LOOP( '', ( #282, #283, #284, #285 ) )
#178 = AXIS2_PLACEMENT_3D( '', #286, #287, #288 )
#179 = EDGE_LOOP( '', ( #289 ) )
#180 = EDGE_LOOP( '', ( #290 ) )
#181 = AXIS2_PLACEMENT_3D( '', #291, #292, #293 )
#182 = EDGE_LOOP( '', ( #294, #295, #296, #297 ) )
#183 = AXIS2_PLACEMENT_3D( '', #298, #299, #300 )
#184 = EDGE_LOOP( '', ( #301, #302, #303, #304 ) )
#185 = AXIS2_PLACEMENT_3D( '', #305, #306, #307 )
#186 = EDGE_LOOP( '', ( #308, #309, #310, #311 ) )
#187 = AXIS2_PLACEMENT_3D( '', #312, #313, #314 )
#188 = EDGE_LOOP( '', ( #315, #316, #317, #318 ) )
#189 = AXIS2_PLACEMENT_3D( '', #319, #320, #321 )
#190 = EDGE_LOOP( '', ( #322, #323, #324, #325 ) )
#191 = AXIS2_PLACEMENT_3D( '', #326, #327, #328 )
#192 = EDGE_LOOP( '', ( #329, #330, #331, #332 ) )
#193 = AXIS2_PLACEMENT_3D( '', #333, #334, #335 )
#194 = ORIENTED_EDGE( '', *, *, #336, .T. )
#195 = ORIENTED_EDGE( '', *, *, #337, .T. )
#196 = ORIENTED_EDGE( '', *, *, #338, .T. )
#197 = ORIENTED_EDGE( '', *, *, #339, .T. )
#198 = ORIENTED_EDGE( '', *, *, #340, .T. )
#199 = ORIENTED_EDGE( '', *, *, #341, .T. )
#200 = ORIENTED_EDGE( '', *, *, #342, .T. )
#201 = ORIENTED_EDGE( '', *, *, #343, .T. )
#202 = ORIENTED_EDGE( '', *, *, #344, .T. )
#203 = ORIENTED_EDGE( '', *, *, #345, .T. )
#204 = ORIENTED_EDGE( '', *, *, #346, .T. )
#205 = ORIENTED_EDGE( '', *, *, #347, .T. )
#206 = ORIENTED_EDGE( '', *, *, #348, .T. )
#207 = ORIENTED_EDGE( '', *, *, #349, .T. )
#208 = ORIENTED_EDGE( '', *, *, #350, .T. )
#209 = ORIENTED_EDGE( '', *, *, #351, .T. )
#210 = CARTESIAN_POINT( '', ( -35.6107784431138, 80.8239520958084, 10.0000000000000 ) )
#211 = DIRECTION( '', ( 0.000000000000000, 0.000000000000000, 1.00000000000000 ) )
#212 = DIRECTION( '', ( 1.00000000000000, 0.000000000000000, 0.000000000000000 ) )
#213 = ORIENTED_EDGE( '', *, *, #352, .T. )
#214 = ORIENTED_EDGE( '', *, *, #353, .F. )
#215 = ORIENTED_EDGE( '', *, *, #338, .F. )
#216 = ORIENTED_EDGE( '', *, *, #354, .T. )
#217 = CARTESIAN_POINT( '', ( 102.389221556886, 80.8239520958084, 10.0000000000000 ) )
#218 = DIRECTION( '', ( 1.00563679766771E-016, -1.00000000000000, 0.000000000000000 ) )
#219 = DIRECTION( '', ( 1.00000000000000, 1.00563679766771E-016, 0.000000000000000 ) )
#220 = ORIENTED_EDGE( '', *, *, #355, .T. )
#221 = ORIENTED_EDGE( '', *, *, #356, .T. )
#222 = ORIENTED_EDGE( '', *, *, #357, .T. )
#223 = ORIENTED_EDGE( '', *, *, #358, .T. )
#224 = ORIENTED_EDGE( '', *, *, #359, .T. )
#225 = ORIENTED_EDGE( '', *, *, #360, .T. )
#226 = ORIENTED_EDGE( '', *, *, #361, .T. )
#227 = ORIENTED_EDGE( '', *, *, #362, .T. )
#228 = ORIENTED_EDGE( '', *, *, #363, .T. )
#229 = ORIENTED_EDGE( '', *, *, #364, .T. )
#230 = ORIENTED_EDGE( '', *, *, #352, .F. )
#231 = ORIENTED_EDGE( '', *, *, #365, .F. )
#232 = ORIENTED_EDGE( '', *, *, #366, .F. )
#233 = ORIENTED_EDGE( '', *, *, #367, .F. )
#234 = ORIENTED_EDGE( '', *, *, #368, .T. )
#235 = ORIENTED_EDGE( '', *, *, #369, .T. )
#236 = CARTESIAN_POINT( '', ( -35.6107784431138, 80.8239520958084, 0.000000000000000 ) )
#237 = DIRECTION( '', ( 0.000000000000000, 0.000000000000000, 1.00000000000000 ) )
#238 = DIRECTION( '', ( 1.00000000000000, 0.000000000000000, 0.000000000000000 ) )
#239 = ORIENTED_EDGE( '', *, *, #367, .T. )
#240 = ORIENTED_EDGE( '', *, *, #370, .F. )
#241 = ORIENTED_EDGE( '', *, *, #339, .F. )
#242 = ORIENTED_EDGE( '', *, *, #353, .T. )
#243 = CARTESIAN_POINT( '', ( -35.6107784431138, 80.8239520958084, 10.0000000000000 ) )
#244 = DIRECTION( '', ( 1.00000000000000, 1.30922526488816E-016, 0.000000000000000 ) )
#245 = DIRECTION( '', ( -1.30922526488816E-016, 1.00000000000000, 0.000000000000000 ) )
#246 = ORIENTED_EDGE( '', *, *, #357, .F. )
#247 = ORIENTED_EDGE( '', *, *, #371, .T. )
#248 = ORIENTED_EDGE( '', *, *, #344, .F. )
#249 = ORIENTED_EDGE( '', *, *, #372, .T. )
#250 = CARTESIAN_POINT( '', ( -5.11077844311377, 80.8239520958084, 0.000000000000000 ) )
#251 = DIRECTION( '', ( -0.894427190999916, 8.27511384415758E-017, -0.447213595499958 ) )
#252 = DIRECTION( '', ( -0.447213595499958, 0.000000000000000, 0.894427190999916 ) )
#253 = ORIENTED_EDGE( '', *, *, #365, .T. )
#254 = ORIENTED_EDGE( '', *, *, #354, .F. )
#255 = ORIENTED_EDGE( '', *, *, #341, .F. )
#256 = ORIENTED_EDGE( '', *, *, #373, .T. )
#257 = CARTESIAN_POINT( '', ( 102.389221556886, -25.1760479041916, 10.0000000000000 ) )
#258 = DIRECTION( '', ( -1.00000000000000, 0.000000000000000, 0.000000000000000 ) )
#259 = DIRECTION( '', ( 0.000000000000000, 0.000000000000000, 1.00000000000000 ) )
#260 = ORIENTED_EDGE( '', *, *, #366, .T. )
#261 = ORIENTED_EDGE( '', *, *, #373, .F. )
#262 = ORIENTED_EDGE( '', *, *, #340, .F. )
#263 = ORIENTED_EDGE( '', *, *, #370, .T. )
#264 = CARTESIAN_POINT( '', ( -35.6107784431138, -25.1760479041916, 10.0000000000000 ) )
#265 = DIRECTION( '', ( 0.000000000000000, 1.00000000000000, 0.000000000000000 ) )
#266 = DIRECTION( '', ( 0.000000000000000, 0.000000000000000, 1.00000000000000 ) )
#267 = ORIENTED_EDGE( '', *, *, #369, .F. )
#268 = ORIENTED_EDGE( '', *, *, #343, .F. )
#269 = CARTESIAN_POINT( '', ( 72.3892215568863, 75.8239520958085, 174.298594371842 ) )
#270 = DIRECTION( '', ( 0.000000000000000, 0.000000000000000, 1.00000000000000 ) )
#271 = DIRECTION( '', ( -1.00000000000000, 0.000000000000000, 0.000000000000000 ) )
#272 = ORIENTED_EDGE( '', *, *, #363, .F. )
#273 = ORIENTED_EDGE( '', *, *, #336, .F. )
#274 = CARTESIAN_POINT( '', ( -5.61077844311377, 75.8239520958085, 174.298594371842 ) )
#275 = DIRECTION( '', ( 0.000000000000000, 0.000000000000000, 1.00000000000000 ) )
#276 = DIRECTION( '', ( -1.00000000000000, 0.000000000000000, 0.000000000000000 ) )
#277 = ORIENTED_EDGE( '', *, *, #364, .F. )
#278 = ORIENTED_EDGE( '', *, *, #337, .F. )
#279 = CARTESIAN_POINT( '', ( 72.3892215568862, -20.1760479041916, 174.298594371842 ) )
#280 = DIRECTION( '', ( 0.000000000000000, 0.000000000000000, 1.00000000000000 ) )
#281 = DIRECTION( '', ( -1.00000000000000, 0.000000000000000, 0.000000000000000 ) )
#282 = ORIENTED_EDGE( '', *, *, #346, .F. )
#283 = ORIENTED_EDGE( '', *, *, #374, .T. )
#284 = ORIENTED_EDGE( '', *, *, #355, .F. )
#285 = ORIENTED_EDGE( '', *, *, #375, .T. )
#286 = CARTESIAN_POINT( '', ( -35.6107784431138, -14.6760479041916, 0.000000000000000 ) )
#287 = DIRECTION( '', ( 0.000000000000000, 0.894427190999916, -0.447213595499958 ) )
#288 = DIRECTION( '', ( 0.000000000000000, 0.447213595499958, 0.894427190999916 ) )
#289 = ORIENTED_EDGE( '', *, *, #368, .F. )
#290 = ORIENTED_EDGE( '', *, *, #342, .F. )
#291 = CARTESIAN_POINT( '', ( -5.61077844311378, -20.1760479041916, 174.298594371842 ) )
#292 = DIRECTION( '', ( 0.000000000000000, 0.000000000000000, 1.00000000000000 ) )
#293 = DIRECTION( '', ( -1.00000000000000, 0.000000000000000, 0.000000000000000 ) )
#294 = ORIENTED_EDGE( '', *, *, #361, .F. )
#295 = ORIENTED_EDGE( '', *, *, #376, .T. )
#296 = ORIENTED_EDGE( '', *, *, #348, .F. )
#297 = ORIENTED_EDGE( '', *, *, #377, .T. )
#298 = CARTESIAN_POINT( '', ( -27.1107784431138, 80.8239520958084, 0.000000000000000 ) )
#299 = DIRECTION( '', ( 0.894427190999916, 0.000000000000000, -0.447213595499958 ) )
#300 = DIRECTION( '', ( -0.447213595499958, 0.000000000000000, -0.894427190999916 ) )
#301 = ORIENTED_EDGE( '', *, *, #359, .F. )
#302 = ORIENTED_EDGE( '', *, *, #378, .T. )
#303 = ORIENTED_EDGE( '', *, *, #350, .F. )
#304 = ORIENTED_EDGE( '', *, *, #379, .T. )
#305 = CARTESIAN_POINT( '', ( -35.6107784431138, 70.3239520958084, 0.000000000000000 ) )
#306 = DIRECTION( '', ( 5.17194615259848E-016, -0.894427190999916, -0.447213595499958 ) )
#307 = DIRECTION( '', ( 0.000000000000000, 0.447213595499958, -0.894427190999916 ) )
#308 = ORIENTED_EDGE( '', *, *, #347, .F. )
#309 = ORIENTED_EDGE( '', *, *, #375, .F. )
#310 = ORIENTED_EDGE( '', *, *, #362, .F. )
#311 = ORIENTED_EDGE( '', *, *, #377, .F. )
#312 = CARTESIAN_POINT( '', ( -9.33072179519729, 3.10400874372489, 29.9699433520835 ) )
#313 = DIRECTION( '', ( -0.408248290463863, -0.408248290463863, -0.816496580927726 ) )
#314 = DIRECTION( '', ( 0.000000000000000, -0.894427190999916, 0.447213595499958 ) )
#315 = ORIENTED_EDGE( '', *, *, #349, .F. )
#316 = ORIENTED_EDGE( '', *, *, #376, .F. )
#317 = ORIENTED_EDGE( '', *, *, #360, .F. )
#318 = ORIENTED_EDGE( '', *, *, #379, .F. )
#319 = CARTESIAN_POINT( '', ( -26.6640551285306, 69.8772287812253, -4.69672331458316 ) )
#320 = DIRECTION( '', ( -0.408248290463863, 0.408248290463863, -0.816496580927726 ) )
#321 = DIRECTION( '', ( 0.000000000000000, -0.894427190999916, -0.447213595499958 ) )
#322 = ORIENTED_EDGE( '', *, *, #358, .F. )
#323 = ORIENTED_EDGE( '', *, *, #372, .F. )
#324 = ORIENTED_EDGE( '', *, *, #351, .F. )
#325 = ORIENTED_EDGE( '', *, *, #378, .F. )
#326 = CARTESIAN_POINT( '', ( -12.0575017576969, 63.3772287812253, 8.30327668541684 ) )
#327 = DIRECTION( '', ( -0.408248290463863, -0.408248290463863, 0.816496580927726 ) )
#328 = DIRECTION( '', ( -2.26623325918419E-017, 0.894427190999916, 0.447213595499958 ) )
#329 = ORIENTED_EDGE( '', *, *, #356, .F. )
#330 = ORIENTED_EDGE( '', *, *, #374, .F. )
#331 = ORIENTED_EDGE( '', *, *, #345, .F. )
#332 = ORIENTED_EDGE( '', *, *, #371, .F. )
#333 = CARTESIAN_POINT( '', ( -22.8908350910303, 3.10400874372489, 29.9699433520835 ) )
#334 = DIRECTION( '', ( -0.408248290463863, 0.408248290463863, 0.816496580927726 ) )
#335 = DIRECTION( '', ( 0.000000000000000, 0.894427190999916, -0.447213595499958 ) )
#336 = EDGE_CURVE( '', #380, #380, #381, .F. )
#337 = EDGE_CURVE( '', #382, #382, #383, .F. )
#338 = EDGE_CURVE( '', #384, #385, #386, .T. )
#339 = EDGE_CURVE( '', #385, #387, #388, .T. )
#340 = EDGE_CURVE( '', #387, #389, #390, .T. )
#341 = EDGE_CURVE( '', #389, #384, #391, .T. )
#342 = EDGE_CURVE( '', #392, #392, #393, .F. )
#343 = EDGE_CURVE( '', #394, #394, #395, .F. )
#344 = EDGE_CURVE( '', #396, #397, #398, .T. )
#345 = EDGE_CURVE( '', #397, #399, #400, .F. )
#346 = EDGE_CURVE( '', #399, #401, #402, .T. )
#347 = EDGE_CURVE( '', #401, #403, #404, .F. )
#348 = EDGE_CURVE( '', #403, #405, #406, .T. )
#349 = EDGE_CURVE( '', #405, #407, #408, .F. )
#350 = EDGE_CURVE( '', #407, #409, #410, .T. )
#351 = EDGE_CURVE( '', #409, #396, #411, .F. )
#352 = EDGE_CURVE( '', #412, #413, #414, .T. )
#353 = EDGE_CURVE( '', #385, #413, #415, .T. )
#354 = EDGE_CURVE( '', #384, #412, #416, .T. )
#355 = EDGE_CURVE( '', #417, #418, #419, .T. )
#356 = EDGE_CURVE( '', #418, #420, #421, .T. )
#357 = EDGE_CURVE( '', #420, #422, #423, .T. )
#358 = EDGE_CURVE( '', #422, #424, #425, .T. )
#359 = EDGE_CURVE( '', #424, #426, #427, .T. )
#360 = EDGE_CURVE( '', #426, #428, #429, .T. )
#361 = EDGE_CURVE( '', #428, #430, #431, .T. )
#362 = EDGE_CURVE( '', #430, #417, #432, .T. )
#363 = EDGE_CURVE( '', #433, #433, #434, .T. )
#364 = EDGE_CURVE( '', #435, #435, #436, .T. )
#365 = EDGE_CURVE( '', #437, #412, #438, .T. )
#366 = EDGE_CURVE( '', #439, #437, #440, .T. )
#367 = EDGE_CURVE( '', #413, #439, #441, .T. )
#368 = EDGE_CURVE( '', #442, #442, #443, .T. )
#369 = EDGE_CURVE( '', #444, #444, #445, .T. )
#370 = EDGE_CURVE( '', #387, #439, #446, .T. )
#371 = EDGE_CURVE( '', #420, #397, #447, .T. )
#372 = EDGE_CURVE( '', #396, #422, #448, .F. )
#373 = EDGE_CURVE( '', #389, #437, #449, .T. )
#374 = EDGE_CURVE( '', #399, #418, #450, .F. )
#375 = EDGE_CURVE( '', #417, #401, #451, .F. )
#376 = EDGE_CURVE( '', #428, #405, #452, .F. )
#377 = EDGE_CURVE( '', #403, #430, #453, .T. )
#378 = EDGE_CURVE( '', #424, #409, #454, .T. )
#379 = EDGE_CURVE( '', #407, #426, #455, .T. )
#380 = VERTEX_POINT( '', #456 )
#381 = CIRCLE( '', #457, 2.25000000000000 )
#382 = VERTEX_POINT( '', #458 )
#383 = CIRCLE( '', #459, 2.25000000000000 )
#384 = VERTEX_POINT( '', #460 )
#385 = VERTEX_POINT( '', #461 )
#386 = LINE( '', #462, #463 )
#387 = VERTEX_POINT( '', #464 )
#388 = LINE( '', #465, #466 )
#389 = VERTEX_POINT( '', #467 )
#390 = LINE( '', #468, #469 )
#391 = LINE( '', #470, #471 )
#392 = VERTEX_POINT( '', #472 )
#393 = CIRCLE( '', #473, 2.25000000000000 )
#394 = VERTEX_POINT( '', #474 )
#395 = CIRCLE( '', #475, 2.25000000000000 )
#396 = VERTEX_POINT( '', #476 )
#397 = VERTEX_POINT( '', #477 )
#398 = LINE( '', #478, #479 )
#399 = VERTEX_POINT( '', #480 )
#400 = ELLIPSE( '', #481, 3.06186217847897, 2.50000000000000 )
#401 = VERTEX_POINT( '', #482 )
#402 = LINE( '', #483, #484 )
#403 = VERTEX_POINT( '', #485 )
#404 = ELLIPSE( '', #486, 3.06186217847897, 2.50000000000000 )
#405 = VERTEX_POINT( '', #487 )
#406 = LINE( '', #488, #489 )
#407 = VERTEX_POINT( '', #490 )
#408 = ELLIPSE( '', #491, 3.06186217847897, 2.50000000000000 )
#409 = VERTEX_POINT( '', #492 )
#410 = LINE( '', #493, #494 )
#411 = ELLIPSE( '', #495, 3.06186217847897, 2.50000000000000 )
#412 = VERTEX_POINT( '', #496 )
#413 = VERTEX_POINT( '', #497 )
#414 = LINE( '', #498, #499 )
#415 = LINE( '', #500, #501 )
#416 = LINE( '', #502, #503 )
#417 = VERTEX_POINT( '', #504 )
#418 = VERTEX_POINT( '', #505 )
#419 = LINE( '', #506, #507 )
#420 = VERTEX_POINT( '', #508 )
#421 = ELLIPSE( '', #509, 3.06186217847897, 2.50000000000000 )
#422 = VERTEX_POINT( '', #510 )
#423 = LINE( '', #511, #512 )
#424 = VERTEX_POINT( '', #513 )
#425 = ELLIPSE( '', #514, 3.06186217847897, 2.50000000000000 )
#426 = VERTEX_POINT( '', #515 )
#427 = LINE( '', #516, #517 )
#428 = VERTEX_POINT( '', #518 )
#429 = ELLIPSE( '', #519, 3.06186217847897, 2.50000000000000 )
#430 = VERTEX_POINT( '', #520 )
#431 = LINE( '', #521, #522 )
#432 = ELLIPSE( '', #523, 3.06186217847897, 2.50000000000000 )
#433 = VERTEX_POINT( '', #524 )
#434 = CIRCLE( '', #525, 2.25000000000000 )
#435 = VERTEX_POINT( '', #526 )
#436 = CIRCLE( '', #527, 2.25000000000000 )
#437 = VERTEX_POINT( '', #528 )
#438 = LINE( '', #529, #530 )
#439 = VERTEX_POINT( '', #531 )
#440 = LINE( '', #532, #533 )
#441 = LINE( '', #534, #535 )
#442 = VERTEX_POINT( '', #536 )
#443 = CIRCLE( '', #537, 2.25000000000000 )
#444 = VERTEX_POINT( '', #538 )
#445 = CIRCLE( '', #539, 2.25000000000000 )
#446 = LINE( '', #540, #541 )
#447 = LINE( '', #542, #543 )
#448 = LINE( '', #544, #545 )
#449 = LINE( '', #546, #547 )
#450 = LINE( '', #548, #549 )
#451 = LINE( '', #550, #551 )
#452 = LINE( '', #552, #553 )
#453 = LINE( '', #554, #555 )
#454 = LINE( '', #556, #557 )
#455 = LINE( '', #558, #559 )
#456 = CARTESIAN_POINT( '', ( -3.36077844311376, 75.8239520958085, 10.0000000000000 ) )
#457 = AXIS2_PLACEMENT_3D( '', #560, #561, #562 )
#458 = CARTESIAN_POINT( '', ( 74.6392215568862, -20.1760479041916, 10.0000000000000 ) )
#459 = AXIS2_PLACEMENT_3D( '', #563, #564, #565 )
#460 = CARTESIAN_POINT( '', ( 102.389221556886, 80.8239520958084, 10.0000000000000 ) )
#461 = CARTESIAN_POINT( '', ( -35.6107784431138, 80.8239520958084, 10.0000000000000 ) )
#462 = CARTESIAN_POINT( '', ( 102.389221556886, 80.8239520958084, 10.0000000000000 ) )
#463 = VECTOR( '', #566, 1000.00000000000 )
#464 = CARTESIAN_POINT( '', ( -35.6107784431138, -25.1760479041916, 10.0000000000000 ) )
#465 = CARTESIAN_POINT( '', ( -35.6107784431138, 80.8239520958084, 10.0000000000000 ) )
#466 = VECTOR( '', #567, 1000.00000000000 )
#467 = CARTESIAN_POINT( '', ( 102.389221556886, -25.1760479041916, 10.0000000000000 ) )
#468 = CARTESIAN_POINT( '', ( -35.6107784431138, -25.1760479041916, 10.0000000000000 ) )
#469 = VECTOR( '', #568, 1000.00000000000 )
#470 = CARTESIAN_POINT( '', ( 102.389221556886, -25.1760479041916, 10.0000000000000 ) )
#471 = VECTOR( '', #569, 1000.00000000000 )
#472 = CARTESIAN_POINT( '', ( -3.36077844311378, -20.1760479041916, 10.0000000000000 ) )
#473 = AXIS2_PLACEMENT_3D( '', #570, #571, #572 )
#474 = CARTESIAN_POINT( '', ( 74.6392215568863, 75.8239520958085, 10.0000000000000 ) )
#475 = AXIS2_PLACEMENT_3D( '', #573, #574, #575 )
#476 = CARTESIAN_POINT( '', ( -10.1107784431138, 63.0878841183086, 10.0000000000000 ) )
#477 = CARTESIAN_POINT( '', ( -10.1107784431138, -7.43997992669182, 10.0000000000000 ) )
#478 = CARTESIAN_POINT( '', ( -10.1107784431138, 80.8239520958084, 10.0000000000000 ) )
#479 = VECTOR( '', #576, 1000.00000000000 )
#480 = CARTESIAN_POINT( '', ( -12.3468464206136, -9.67604790419160, 10.0000000000000 ) )
#481 = AXIS2_PLACEMENT_3D( '', #577, #578, #579 )
#482 = CARTESIAN_POINT( '', ( -19.8747104656140, -9.67604790419160, 10.0000000000000 ) )
#483 = CARTESIAN_POINT( '', ( -35.6107784431138, -9.67604790419160, 10.0000000000000 ) )
#484 = VECTOR( '', #580, 1000.00000000000 )
#485 = CARTESIAN_POINT( '', ( -22.1107784431138, -7.43997992669182, 10.0000000000000 ) )
#486 = AXIS2_PLACEMENT_3D( '', #581, #582, #583 )
#487 = CARTESIAN_POINT( '', ( -22.1107784431138, 63.0878841183086, 10.0000000000000 ) )
#488 = CARTESIAN_POINT( '', ( -22.1107784431138, 80.8239520958084, 10.0000000000000 ) )
#489 = VECTOR( '', #584, 1000.00000000000 )
#490 = CARTESIAN_POINT( '', ( -19.8747104656140, 65.3239520958084, 10.0000000000000 ) )
#491 = AXIS2_PLACEMENT_3D( '', #585, #586, #587 )
#492 = CARTESIAN_POINT( '', ( -12.3468464206136, 65.3239520958084, 10.0000000000000 ) )
#493 = CARTESIAN_POINT( '', ( -35.6107784431138, 65.3239520958084, 10.0000000000000 ) )
#494 = VECTOR( '', #588, 1000.00000000000 )
#495 = AXIS2_PLACEMENT_3D( '', #589, #590, #591 )
#496 = CARTESIAN_POINT( '', ( 102.389221556886, 80.8239520958084, 0.000000000000000 ) )
#497 = CARTESIAN_POINT( '', ( -35.6107784431138, 80.8239520958084, 0.000000000000000 ) )
#498 = CARTESIAN_POINT( '', ( 102.389221556886, 80.8239520958084, 0.000000000000000 ) )
#499 = VECTOR( '', #592, 1000.00000000000 )
#500 = CARTESIAN_POINT( '', ( -35.6107784431138, 80.8239520958084, 10.0000000000000 ) )
#501 = VECTOR( '', #593, 1000.00000000000 )
#502 = CARTESIAN_POINT( '', ( 102.389221556886, 80.8239520958084, 10.0000000000000 ) )
#503 = VECTOR( '', #594, 1000.00000000000 )
#504 = CARTESIAN_POINT( '', ( -24.8747104656140, -14.6760479041916, 0.000000000000000 ) )
#505 = CARTESIAN_POINT( '', ( -7.34684642061357, -14.6760479041916, 0.000000000000000 ) )
#506 = CARTESIAN_POINT( '', ( -10.1107784431138, -14.6760479041916, 0.000000000000000 ) )
#507 = VECTOR( '', #595, 1000.00000000000 )
#508 = CARTESIAN_POINT( '', ( -5.11077844311378, -12.4399799266918, 0.000000000000000 ) )
#509 = AXIS2_PLACEMENT_3D( '', #596, #597, #598 )
#510 = CARTESIAN_POINT( '', ( -5.11077844311378, 68.0878841183086, 0.000000000000000 ) )
#511 = CARTESIAN_POINT( '', ( -5.11077844311378, 65.3239520958084, 0.000000000000000 ) )
#512 = VECTOR( '', #599, 1000.00000000000 )
#513 = CARTESIAN_POINT( '', ( -7.34684642061357, 70.3239520958084, 0.000000000000000 ) )
#514 = AXIS2_PLACEMENT_3D( '', #600, #601, #602 )
#515 = CARTESIAN_POINT( '', ( -24.8747104656140, 70.3239520958084, 0.000000000000000 ) )
#516 = CARTESIAN_POINT( '', ( -22.1107784431138, 70.3239520958084, 0.000000000000000 ) )
#517 = VECTOR( '', #603, 1000.00000000000 )
#518 = CARTESIAN_POINT( '', ( -27.1107784431138, 68.0878841183086, 0.000000000000000 ) )
#519 = AXIS2_PLACEMENT_3D( '', #604, #605, #606 )
#520 = CARTESIAN_POINT( '', ( -27.1107784431138, -12.4399799266918, 0.000000000000000 ) )
#521 = CARTESIAN_POINT( '', ( -27.1107784431138, -9.67604790419160, 0.000000000000000 ) )
#522 = VECTOR( '', #607, 1000.00000000000 )
#523 = AXIS2_PLACEMENT_3D( '', #608, #609, #610 )
#524 = CARTESIAN_POINT( '', ( -3.36077844311376, 75.8239520958085, 0.000000000000000 ) )
#525 = AXIS2_PLACEMENT_3D( '', #611, #612, #613 )
#526 = CARTESIAN_POINT( '', ( 74.6392215568862, -20.1760479041916, 0.000000000000000 ) )
#527 = AXIS2_PLACEMENT_3D( '', #614, #615, #616 )
#528 = CARTESIAN_POINT( '', ( 102.389221556886, -25.1760479041916, 0.000000000000000 ) )
#529 = CARTESIAN_POINT( '', ( 102.389221556886, -25.1760479041916, 0.000000000000000 ) )
#530 = VECTOR( '', #617, 1000.00000000000 )
#531 = CARTESIAN_POINT( '', ( -35.6107784431138, -25.1760479041916, 0.000000000000000 ) )
#532 = CARTESIAN_POINT( '', ( -35.6107784431138, -25.1760479041916, 0.000000000000000 ) )
#533 = VECTOR( '', #618, 1000.00000000000 )
#534 = CARTESIAN_POINT( '', ( -35.6107784431138, 80.8239520958084, 0.000000000000000 ) )
#535 = VECTOR( '', #619, 1000.00000000000 )
#536 = CARTESIAN_POINT( '', ( -3.36077844311378, -20.1760479041916, 0.000000000000000 ) )
#537 = AXIS2_PLACEMENT_3D( '', #620, #621, #622 )
#538 = CARTESIAN_POINT( '', ( 74.6392215568863, 75.8239520958085, 0.000000000000000 ) )
#539 = AXIS2_PLACEMENT_3D( '', #623, #624, #625 )
#540 = CARTESIAN_POINT( '', ( -35.6107784431138, -25.1760479041916, 10.0000000000000 ) )
#541 = VECTOR( '', #626, 1000.00000000000 )
#542 = CARTESIAN_POINT( '', ( -9.73810044686382, -7.81265792294178, 9.25464400750008 ) )
#543 = VECTOR( '', #627, 1000.00000000000 )
#544 = CARTESIAN_POINT( '', ( -4.73810044686381, 68.4605621145586, -0.745355992499933 ) )
#545 = VECTOR( '', #628, 1000.00000000000 )
#546 = CARTESIAN_POINT( '', ( 102.389221556886, -25.1760479041916, 10.0000000000000 ) )
#547 = VECTOR( '', #629, 1000.00000000000 )
#548 = CARTESIAN_POINT( '', ( -6.97416842436361, -15.0487259004416, -0.745355992499919 ) )
#549 = VECTOR( '', #630, 1000.00000000000 )
#550 = CARTESIAN_POINT( '', ( -20.2473884618640, -10.0487259004416, 9.25464400750008 ) )
#551 = VECTOR( '', #631, 1000.00000000000 )
#552 = CARTESIAN_POINT( '', ( -22.4834564393637, 63.4605621145586, 9.25464400750007 ) )
#553 = VECTOR( '', #632, 1000.00000000000 )
#554 = CARTESIAN_POINT( '', ( -27.4834564393637, -12.8126579229418, -0.745355992499932 ) )
#555 = VECTOR( '', #633, 1000.00000000000 )
#556 = CARTESIAN_POINT( '', ( -11.9741684243636, 65.6966300920584, 9.25464400750008 ) )
#557 = VECTOR( '', #634, 1000.00000000000 )
#558 = CARTESIAN_POINT( '', ( -25.2473884618640, 70.6966300920584, -0.745355992499934 ) )
#559 = VECTOR( '', #635, 1000.00000000000 )
#560 = CARTESIAN_POINT( '', ( -5.61077844311377, 75.8239520958085, 10.0000000000000 ) )
#561 = DIRECTION( '', ( 0.000000000000000, 0.000000000000000, 1.00000000000000 ) )
#562 = DIRECTION( '', ( 1.00000000000000, 0.000000000000000, 0.000000000000000 ) )
#563 = CARTESIAN_POINT( '', ( 72.3892215568862, -20.1760479041916, 10.0000000000000 ) )
#564 = DIRECTION( '', ( 0.000000000000000, 0.000000000000000, 1.00000000000000 ) )
#565 = DIRECTION( '', ( 1.00000000000000, 0.000000000000000, 0.000000000000000 ) )
#566 = DIRECTION( '', ( -1.00000000000000, -1.00563679766771E-016, 0.000000000000000 ) )
#567 = DIRECTION( '', ( 1.30922526488816E-016, -1.00000000000000, 0.000000000000000 ) )
#568 = DIRECTION( '', ( 1.00000000000000, 0.000000000000000, 0.000000000000000 ) )
#569 = DIRECTION( '', ( 0.000000000000000, 1.00000000000000, 0.000000000000000 ) )
#570 = CARTESIAN_POINT( '', ( -5.61077844311378, -20.1760479041916, 10.0000000000000 ) )
#571 = DIRECTION( '', ( 0.000000000000000, 0.000000000000000, 1.00000000000000 ) )
#572 = DIRECTION( '', ( 1.00000000000000, 0.000000000000000, 0.000000000000000 ) )
#573 = CARTESIAN_POINT( '', ( 72.3892215568863, 75.8239520958085, 10.0000000000000 ) )
#574 = DIRECTION( '', ( 0.000000000000000, 0.000000000000000, 1.00000000000000 ) )
#575 = DIRECTION( '', ( 1.00000000000000, 0.000000000000000, 0.000000000000000 ) )
#576 = DIRECTION( '', ( -9.25185853854297E-017, -1.00000000000000, 0.000000000000000 ) )
#577 = CARTESIAN_POINT( '', ( -12.9058634149885, -6.88096293231687, 10.0000000000000 ) )
#578 = DIRECTION( '', ( 0.000000000000000, 0.000000000000000, 1.00000000000000 ) )
#579 = DIRECTION( '', ( 0.707106781186547, -0.707106781186548, 0.000000000000000 ) )
#580 = DIRECTION( '', ( -1.00000000000000, 0.000000000000000, 0.000000000000000 ) )
#581 = CARTESIAN_POINT( '', ( -19.3156934712390, -6.88096293231687, 10.0000000000000 ) )
#582 = DIRECTION( '', ( 0.000000000000000, 0.000000000000000, 1.00000000000000 ) )
#583 = DIRECTION( '', ( 0.707106781186547, 0.707106781186548, 0.000000000000000 ) )
#584 = DIRECTION( '', ( 0.000000000000000, 1.00000000000000, 0.000000000000000 ) )
#585 = CARTESIAN_POINT( '', ( -19.3156934712390, 62.5288671239337, 10.0000000000000 ) )
#586 = DIRECTION( '', ( 0.000000000000000, 0.000000000000000, 1.00000000000000 ) )
#587 = DIRECTION( '', ( 0.707106781186547, -0.707106781186548, 0.000000000000000 ) )
#588 = DIRECTION( '', ( 1.00000000000000, 5.78241158658936E-016, 0.000000000000000 ) )
#589 = CARTESIAN_POINT( '', ( -12.9058634149885, 62.5288671239337, 10.0000000000000 ) )
#590 = DIRECTION( '', ( 0.000000000000000, 0.000000000000000, 1.00000000000000 ) )
#591 = DIRECTION( '', ( 0.707106781186547, 0.707106781186548, 0.000000000000000 ) )
#592 = DIRECTION( '', ( -1.00000000000000, -1.00563679766771E-016, 0.000000000000000 ) )
#593 = DIRECTION( '', ( 0.000000000000000, 0.000000000000000, -1.00000000000000 ) )
#594 = DIRECTION( '', ( 0.000000000000000, 0.000000000000000, -1.00000000000000 ) )
#595 = DIRECTION( '', ( 1.00000000000000, 0.000000000000000, 0.000000000000000 ) )
#596 = CARTESIAN_POINT( '', ( -7.90586341498852, -11.8809629323169, -3.46944695195361E-015 ) )
#597 = DIRECTION( '', ( 0.000000000000000, 0.000000000000000, 1.00000000000000 ) )
#598 = DIRECTION( '', ( 0.707106781186547, -0.707106781186548, 0.000000000000000 ) )
#599 = DIRECTION( '', ( 9.25185853854297E-017, 1.00000000000000, 0.000000000000000 ) )
#600 = CARTESIAN_POINT( '', ( -7.90586341498851, 67.5288671239337, 0.000000000000000 ) )
#601 = DIRECTION( '', ( 0.000000000000000, 0.000000000000000, 1.00000000000000 ) )
#602 = DIRECTION( '', ( 0.707106781186547, 0.707106781186548, 0.000000000000000 ) )
#603 = DIRECTION( '', ( -1.00000000000000, -5.78241158658936E-016, 0.000000000000000 ) )
#604 = CARTESIAN_POINT( '', ( -24.3156934712390, 67.5288671239337, 0.000000000000000 ) )
#605 = DIRECTION( '', ( 0.000000000000000, 0.000000000000000, 1.00000000000000 ) )
#606 = DIRECTION( '', ( 0.707106781186547, -0.707106781186548, 0.000000000000000 ) )
#607 = DIRECTION( '', ( 0.000000000000000, -1.00000000000000, 0.000000000000000 ) )
#608 = CARTESIAN_POINT( '', ( -24.3156934712390, -11.8809629323169, -3.46944695195361E-015 ) )
#609 = DIRECTION( '', ( 0.000000000000000, 0.000000000000000, 1.00000000000000 ) )
#610 = DIRECTION( '', ( 0.707106781186547, 0.707106781186548, 0.000000000000000 ) )
#611 = CARTESIAN_POINT( '', ( -5.61077844311377, 75.8239520958085, 0.000000000000000 ) )
#612 = DIRECTION( '', ( 0.000000000000000, 0.000000000000000, 1.00000000000000 ) )
#613 = DIRECTION( '', ( 1.00000000000000, 0.000000000000000, 0.000000000000000 ) )
#614 = CARTESIAN_POINT( '', ( 72.3892215568862, -20.1760479041916, 0.000000000000000 ) )
#615 = DIRECTION( '', ( 0.000000000000000, 0.000000000000000, 1.00000000000000 ) )
#616 = DIRECTION( '', ( 1.00000000000000, 0.000000000000000, 0.000000000000000 ) )
#617 = DIRECTION( '', ( 0.000000000000000, 1.00000000000000, 0.000000000000000 ) )
#618 = DIRECTION( '', ( 1.00000000000000, 0.000000000000000, 0.000000000000000 ) )
#619 = DIRECTION( '', ( 1.30922526488816E-016, -1.00000000000000, 0.000000000000000 ) )
#620 = CARTESIAN_POINT( '', ( -5.61077844311378, -20.1760479041916, 0.000000000000000 ) )
#621 = DIRECTION( '', ( 0.000000000000000, 0.000000000000000, 1.00000000000000 ) )
#622 = DIRECTION( '', ( 1.00000000000000, 0.000000000000000, 0.000000000000000 ) )
#623 = CARTESIAN_POINT( '', ( 72.3892215568863, 75.8239520958085, 0.000000000000000 ) )
#624 = DIRECTION( '', ( 0.000000000000000, 0.000000000000000, 1.00000000000000 ) )
#625 = DIRECTION( '', ( 1.00000000000000, 0.000000000000000, 0.000000000000000 ) )
#626 = DIRECTION( '', ( 0.000000000000000, 0.000000000000000, -1.00000000000000 ) )
#627 = DIRECTION( '', ( -0.408248290463863, 0.408248290463863, 0.816496580927726 ) )
#628 = DIRECTION( '', ( -0.408248290463863, -0.408248290463863, 0.816496580927726 ) )
#629 = DIRECTION( '', ( 0.000000000000000, 0.000000000000000, -1.00000000000000 ) )
#630 = DIRECTION( '', ( -0.408248290463863, 0.408248290463863, 0.816496580927726 ) )
#631 = DIRECTION( '', ( -0.408248290463863, -0.408248290463863, -0.816496580927726 ) )
#632 = DIRECTION( '', ( -0.408248290463863, 0.408248290463863, -0.816496580927726 ) )
#633 = DIRECTION( '', ( -0.408248290463863, -0.408248290463863, -0.816496580927726 ) )
#634 = DIRECTION( '', ( -0.408248290463863, -0.408248290463863, 0.816496580927726 ) )
#635 = DIRECTION( '', ( -0.408248290463863, 0.408248290463863, -0.816496580927726 ) )
ENDSEC
END-ISO-10303-21
