# Supplementary material for: Microfluidics on liquid handling stations (μF-on-LHS): an industry compatible chip interface between microfluidics and automated liquid handling stations
Source: Royal Society of Chemistry journal article supplement (doi:10.1039/c3lc00042g), 2013-01-01
Supplement: c3lc00042g_6.stp [file c3lc00042g_6.stp]

ISO-10303-21
HEADER
FILE_DESCRIPTION( ( 'Unknown' ), '1' )
FILE_NAME( 'W:/Arbeitsbackup20121130/Projekt 10-871/_ISO_Projektmanagement/Fach24_CAD/Pipettierroboter/Top_part.stp', 'Unknown', ( 'Unknown' ), ( 'Unknown' ), 'XStep 1.0', 'Unknown', ' ' )
FILE_SCHEMA( ( 'CONFIG_CONTROL_DESIGN' ) )
ENDSEC
DATA
#1 = DESIGN_CONTEXT( '', #27, 'design' )
#2 = APPLICATION_PROTOCOL_DEFINITION( 'INTERNATIONAL STANDARD', 'config_control_design', 1994, #27 )
#3 = PRODUCT_CATEGORY_RELATIONSHIP( 'NONE', 'NONE', #28, #29 )
#4 = DATE_AND_TIME( #30, #31 )
#5 = DATE_TIME_ROLE( 'creation_date' )
#6 = DATE_TIME_ROLE( 'classification_date' )
#7 = PERSON_AND_ORGANIZATION_ROLE( 'creator' )
#8 = PERSON_AND_ORGANIZATION_ROLE( 'design_supplier' )
#9 = PERSON_AND_ORGANIZATION_ROLE( 'classification_officer' )
#10 = PERSON_AND_ORGANIZATION_ROLE( 'design_owner' )
#11 = APPROVAL_PERSON_ORGANIZATION( #32, #33, #34 )
#12 = APPROVAL_DATE_TIME( #4, #33 )
#13 = CC_DESIGN_APPROVAL( #33, ( #35, #36, #37 ) )
#14 = CC_DESIGN_DATE_AND_TIME_ASSIGNMENT( #4, #5, ( #37 ) )
#15 = CC_DESIGN_DATE_AND_TIME_ASSIGNMENT( #4, #6, ( #35 ) )
#16 = CC_DESIGN_PERSON_AND_ORGANIZATION_ASSIGNMENT( #32, #10, ( #38 ) )
#17 = CC_DESIGN_PERSON_AND_ORGANIZATION_ASSIGNMENT( #32, #7, ( #37 ) )
#18 = CC_DESIGN_PERSON_AND_ORGANIZATION_ASSIGNMENT( #32, #7, ( #36 ) )
#19 = CC_DESIGN_PERSON_AND_ORGANIZATION_ASSIGNMENT( #32, #8, ( #36 ) )
#20 = CC_DESIGN_SECURITY_CLASSIFICATION( #35, ( #36 ) )
#21 = CC_DESIGN_PERSON_AND_ORGANIZATION_ASSIGNMENT( #32, #9, ( #35 ) )
#22 = SHAPE_DEFINITION_REPRESENTATION( #39, #40 )
#23 = ( GEOMETRIC_REPRESENTATION_CONTEXT( 3 )GLOBAL_UNCERTAINTY_ASSIGNED_CONTEXT( ( #43 ) )GLOBAL_UNIT_ASSIGNED_CONTEXT( ( #45, #46, #47 ) )REPRESENTATION_CONTEXT( 'NONE', 'WORKSPACE' ) )
#27 = APPLICATION_CONTEXT( 'CONFIGURATION CONTROLLED 3D DESIGNS OF MECHANICAL PARTS AND ASSEMBLIES' )
#28 = PRODUCT_CATEGORY( 'part', 'NONE' )
#29 = PRODUCT_RELATED_PRODUCT_CATEGORY( 'detail', ' ', ( #38 ) )
#30 = CALENDAR_DATE( 2012, 6, 11 )
#31 = LOCAL_TIME( 10, 18, 49.0000000000000, #49 )
#32 = PERSON_AND_ORGANIZATION( #50, #51 )
#33 = APPROVAL( #52, 'SOLID MODEL' )
#34 = APPROVAL_ROLE( 'APPROVED' )
#35 = SECURITY_CLASSIFICATION( '', '', #53 )
#36 = PRODUCT_DEFINITION_FORMATION_WITH_SPECIFIED_SOURCE( ' ', 'NONE', #38, .NOT_KNOWN. )
#37 = PRODUCT_DEFINITION( 'NONE', 'NONE', #36, #1 )
#38 = PRODUCT( '1', '1', 'PART-1-DESC', ( #54 ) )
#39 = PRODUCT_DEFINITION_SHAPE( 'NONE', 'NONE', #37 )
#40 = ADVANCED_BREP_SHAPE_REPRESENTATION( '1', ( #55, #56 ), #23 )
#43 = UNCERTAINTY_MEASURE_WITH_UNIT( LENGTH_MEASURE( 0.00100000000000000 ), #45, '', '' )
#45 = ( CONVERSION_BASED_UNIT( 'MILLIMETRE', #59 )LENGTH_UNIT( )NAMED_UNIT( #62 ) )
#46 = ( NAMED_UNIT( #64 )PLANE_ANGLE_UNIT( )SI_UNIT( $, .RADIAN. ) )
#47 = ( NAMED_UNIT( #64 )SOLID_ANGLE_UNIT( )SI_UNIT( $, .STERADIAN. ) )
#49 = COORDINATED_UNIVERSAL_TIME_OFFSET( 1, 0, .AHEAD. )
#50 = PERSON( '', 'UNSPECIFIED', $, $, $, $ )
#51 = ORGANIZATION( 'UNSPECIFIED', 'UNSPECIFIED', 'UNSPECIFIED' )
#52 = APPROVAL_STATUS( 'approved' )
#53 = SECURITY_CLASSIFICATION_LEVEL( 'unclassified' )
#54 = MECHANICAL_CONTEXT( '', #27, 'mechanical' )
#55 = MANIFOLD_SOLID_BREP( '1', #70 )
#56 = AXIS2_PLACEMENT_3D( '', #71, #72, #73 )
#59 = LENGTH_MEASURE_WITH_UNIT( LENGTH_MEASURE( 1.00000000000000 ), #74 )
#62 = DIMENSIONAL_EXPONENTS( 1.00000000000000, 0.000000000000000, 0.000000000000000, 0.000000000000000, 0.000000000000000, 0.000000000000000, 0.000000000000000 )
#64 = DIMENSIONAL_EXPONENTS( 0.000000000000000, 0.000000000000000, 0.000000000000000, 0.000000000000000, 0.000000000000000, 0.000000000000000, 0.000000000000000 )
#70 = CLOSED_SHELL( '', ( #75, #76, #77, #78, #79, #80, #81, #82, #83, #84, #85, #86, #87, #88, #89, #90, #91, #92 ) )
#71 = CARTESIAN_POINT( '', ( 0.000000000000000, 0.000000000000000, 0.000000000000000 ) )
#72 = DIRECTION( '', ( 0.000000000000000, 0.000000000000000, 1.00000000000000 ) )
#73 = DIRECTION( '', ( 1.00000000000000, 0.000000000000000, 0.000000000000000 ) )
#74 = ( NAMED_UNIT( #62 )LENGTH_UNIT( )SI_UNIT( .MILLI., .METRE. ) )
#75 = ADVANCED_FACE( '', ( #94 ), #95, .F. )
#76 = ADVANCED_FACE( '', ( #96, #97, #98, #99, #100, #101, #102, #103, #104, #105, #106, #107, #108 ), #109, .F. )
#77 = ADVANCED_FACE( '', ( #110 ), #111, .F. )
#78 = ADVANCED_FACE( '', ( #112 ), #113, .F. )
#79 = ADVANCED_FACE( '', ( #114 ), #115, .F. )
#80 = ADVANCED_FACE( '', ( #116, #117, #118, #119, #120, #121, #122, #123, #124, #125, #126, #127, #128 ), #129, .T. )
#81 = ADVANCED_FACE( '', ( #130, #131 ), #132, .F. )
#82 = ADVANCED_FACE( '', ( #133, #134 ), #135, .F. )
#83 = ADVANCED_FACE( '', ( #136, #137 ), #138, .F. )
#84 = ADVANCED_FACE( '', ( #139, #140 ), #141, .F. )
#85 = ADVANCED_FACE( '', ( #142, #143 ), #144, .F. )
#86 = ADVANCED_FACE( '', ( #145, #146 ), #147, .F. )
#87 = ADVANCED_FACE( '', ( #148, #149 ), #150, .F. )
#88 = ADVANCED_FACE( '', ( #151, #152 ), #153, .F. )
#89 = ADVANCED_FACE( '', ( #154, #155 ), #156, .F. )
#90 = ADVANCED_FACE( '', ( #157, #158 ), #159, .F. )
#91 = ADVANCED_FACE( '', ( #160, #161 ), #162, .F. )
#92 = ADVANCED_FACE( '', ( #163, #164 ), #165, .F. )
#94 = FACE_OUTER_BOUND( '', #166, .T. )
#95 = PLANE( '', #167 )
#96 = FACE_BOUND( '', #168, .T. )
#97 = FACE_BOUND( '', #169, .T. )
#98 = FACE_BOUND( '', #170, .T. )
#99 = FACE_BOUND( '', #171, .T. )
#100 = FACE_BOUND( '', #172, .T. )
#101 = FACE_BOUND( '', #173, .T. )
#102 = FACE_BOUND( '', #174, .T. )
#103 = FACE_BOUND( '', #175, .T. )
#104 = FACE_BOUND( '', #176, .T. )
#105 = FACE_BOUND( '', #177, .T. )
#106 = FACE_BOUND( '', #178, .T. )
#107 = FACE_BOUND( '', #179, .T. )
#108 = FACE_OUTER_BOUND( '', #180, .T. )
#109 = PLANE( '', #181 )
#110 = FACE_OUTER_BOUND( '', #182, .T. )
#111 = PLANE( '', #183 )
#112 = FACE_OUTER_BOUND( '', #184, .T. )
#113 = PLANE( '', #185 )
#114 = FACE_OUTER_BOUND( '', #186, .T. )
#115 = PLANE( '', #187 )
#116 = FACE_BOUND( '', #188, .T. )
#117 = FACE_BOUND( '', #189, .T. )
#118 = FACE_BOUND( '', #190, .T. )
#119 = FACE_BOUND( '', #191, .T. )
#120 = FACE_BOUND( '', #192, .T. )
#121 = FACE_BOUND( '', #193, .T. )
#122 = FACE_BOUND( '', #194, .T. )
#123 = FACE_BOUND( '', #195, .T. )
#124 = FACE_BOUND( '', #196, .T. )
#125 = FACE_BOUND( '', #197, .T. )
#126 = FACE_BOUND( '', #198, .T. )
#127 = FACE_BOUND( '', #199, .T. )
#128 = FACE_OUTER_BOUND( '', #200, .T. )
#129 = PLANE( '', #201 )
#130 = FACE_OUTER_BOUND( '', #202, .T. )
#131 = FACE_OUTER_BOUND( '', #203, .T. )
#132 = CYLINDRICAL_SURFACE( '', #204, 1.62100000000000 )
#133 = FACE_OUTER_BOUND( '', #205, .T. )
#134 = FACE_OUTER_BOUND( '', #206, .T. )
#135 = CYLINDRICAL_SURFACE( '', #207, 3.32350000000000 )
#136 = FACE_OUTER_BOUND( '', #208, .T. )
#137 = FACE_OUTER_BOUND( '', #209, .T. )
#138 = CYLINDRICAL_SURFACE( '', #210, 1.62100000000000 )
#139 = FACE_OUTER_BOUND( '', #211, .T. )
#140 = FACE_OUTER_BOUND( '', #212, .T. )
#141 = CYLINDRICAL_SURFACE( '', #213, 1.62100000000000 )
#142 = FACE_OUTER_BOUND( '', #214, .T. )
#143 = FACE_OUTER_BOUND( '', #215, .T. )
#144 = CYLINDRICAL_SURFACE( '', #216, 1.62100000000000 )
#145 = FACE_OUTER_BOUND( '', #217, .T. )
#146 = FACE_OUTER_BOUND( '', #218, .T. )
#147 = CYLINDRICAL_SURFACE( '', #219, 3.32350000000000 )
#148 = FACE_OUTER_BOUND( '', #220, .T. )
#149 = FACE_OUTER_BOUND( '', #221, .T. )
#150 = CYLINDRICAL_SURFACE( '', #222, 3.32350000000000 )
#151 = FACE_OUTER_BOUND( '', #223, .T. )
#152 = FACE_OUTER_BOUND( '', #224, .T. )
#153 = CYLINDRICAL_SURFACE( '', #225, 3.32350000000000 )
#154 = FACE_OUTER_BOUND( '', #226, .T. )
#155 = FACE_OUTER_BOUND( '', #227, .T. )
#156 = CYLINDRICAL_SURFACE( '', #228, 3.32350000000000 )
#157 = FACE_OUTER_BOUND( '', #229, .T. )
#158 = FACE_OUTER_BOUND( '', #230, .T. )
#159 = CYLINDRICAL_SURFACE( '', #231, 3.32350000000000 )
#160 = FACE_OUTER_BOUND( '', #232, .T. )
#161 = FACE_OUTER_BOUND( '', #233, .T. )
#162 = CYLINDRICAL_SURFACE( '', #234, 3.32350000000000 )
#163 = FACE_OUTER_BOUND( '', #235, .T. )
#164 = FACE_OUTER_BOUND( '', #236, .T. )
#165 = CYLINDRICAL_SURFACE( '', #237, 3.32350000000000 )
#166 = EDGE_LOOP( '', ( #238, #239, #240, #241 ) )
#167 = AXIS2_PLACEMENT_3D( '', #242, #243, #244 )
#168 = EDGE_LOOP( '', ( #245 ) )
#169 = EDGE_LOOP( '', ( #246 ) )
#170 = EDGE_LOOP( '', ( #247 ) )
#171 = EDGE_LOOP( '', ( #248 ) )
#172 = EDGE_LOOP( '', ( #249 ) )
#173 = EDGE_LOOP( '', ( #250 ) )
#174 = EDGE_LOOP( '', ( #251 ) )
#175 = EDGE_LOOP( '', ( #252 ) )
#176 = EDGE_LOOP( '', ( #253 ) )
#177 = EDGE_LOOP( '', ( #254 ) )
#178 = EDGE_LOOP( '', ( #255 ) )
#179 = EDGE_LOOP( '', ( #256 ) )
#180 = EDGE_LOOP( '', ( #257, #258, #259, #260 ) )
#181 = AXIS2_PLACEMENT_3D( '', #261, #262, #263 )
#182 = EDGE_LOOP( '', ( #264, #265, #266, #267 ) )
#183 = AXIS2_PLACEMENT_3D( '', #268, #269, #270 )
#184 = EDGE_LOOP( '', ( #271, #272, #273, #274 ) )
#185 = AXIS2_PLACEMENT_3D( '', #275, #276, #277 )
#186 = EDGE_LOOP( '', ( #278, #279, #280, #281 ) )
#187 = AXIS2_PLACEMENT_3D( '', #282, #283, #284 )
#188 = EDGE_LOOP( '', ( #285 ) )
#189 = EDGE_LOOP( '', ( #286 ) )
#190 = EDGE_LOOP( '', ( #287 ) )
#191 = EDGE_LOOP( '', ( #288 ) )
#192 = EDGE_LOOP( '', ( #289 ) )
#193 = EDGE_LOOP( '', ( #290 ) )
#194 = EDGE_LOOP( '', ( #291 ) )
#195 = EDGE_LOOP( '', ( #292 ) )
#196 = EDGE_LOOP( '', ( #293 ) )
#197 = EDGE_LOOP( '', ( #294 ) )
#198 = EDGE_LOOP( '', ( #295 ) )
#199 = EDGE_LOOP( '', ( #296 ) )
#200 = EDGE_LOOP( '', ( #297, #298, #299, #300 ) )
#201 = AXIS2_PLACEMENT_3D( '', #301, #302, #303 )
#202 = EDGE_LOOP( '', ( #304 ) )
#203 = EDGE_LOOP( '', ( #305 ) )
#204 = AXIS2_PLACEMENT_3D( '', #306, #307, #308 )
#205 = EDGE_LOOP( '', ( #309 ) )
#206 = EDGE_LOOP( '', ( #310 ) )
#207 = AXIS2_PLACEMENT_3D( '', #311, #312, #313 )
#208 = EDGE_LOOP( '', ( #314 ) )
#209 = EDGE_LOOP( '', ( #315 ) )
#210 = AXIS2_PLACEMENT_3D( '', #316, #317, #318 )
#211 = EDGE_LOOP( '', ( #319 ) )
#212 = EDGE_LOOP( '', ( #320 ) )
#213 = AXIS2_PLACEMENT_3D( '', #321, #322, #323 )
#214 = EDGE_LOOP( '', ( #324 ) )
#215 = EDGE_LOOP( '', ( #325 ) )
#216 = AXIS2_PLACEMENT_3D( '', #326, #327, #328 )
#217 = EDGE_LOOP( '', ( #329 ) )
#218 = EDGE_LOOP( '', ( #330 ) )
#219 = AXIS2_PLACEMENT_3D( '', #331, #332, #333 )
#220 = EDGE_LOOP( '', ( #334 ) )
#221 = EDGE_LOOP( '', ( #335 ) )
#222 = AXIS2_PLACEMENT_3D( '', #336, #337, #338 )
#223 = EDGE_LOOP( '', ( #339 ) )
#224 = EDGE_LOOP( '', ( #340 ) )
#225 = AXIS2_PLACEMENT_3D( '', #341, #342, #343 )
#226 = EDGE_LOOP( '', ( #344 ) )
#227 = EDGE_LOOP( '', ( #345 ) )
#228 = AXIS2_PLACEMENT_3D( '', #346, #347, #348 )
#229 = EDGE_LOOP( '', ( #349 ) )
#230 = EDGE_LOOP( '', ( #350 ) )
#231 = AXIS2_PLACEMENT_3D( '', #351, #352, #353 )
#232 = EDGE_LOOP( '', ( #354 ) )
#233 = EDGE_LOOP( '', ( #355 ) )
#234 = AXIS2_PLACEMENT_3D( '', #356, #357, #358 )
#235 = EDGE_LOOP( '', ( #359 ) )
#236 = EDGE_LOOP( '', ( #360 ) )
#237 = AXIS2_PLACEMENT_3D( '', #361, #362, #363 )
#238 = ORIENTED_EDGE( '', *, *, #364, .T. )
#239 = ORIENTED_EDGE( '', *, *, #365, .F. )
#240 = ORIENTED_EDGE( '', *, *, #366, .F. )
#241 = ORIENTED_EDGE( '', *, *, #367, .T. )
#242 = CARTESIAN_POINT( '', ( 102.389221556886, 80.8239520958084, 8.00000000000000 ) )
#243 = DIRECTION( '', ( 1.00563679766771E-016, -1.00000000000000, 0.000000000000000 ) )
#244 = DIRECTION( '', ( 1.00000000000000, 1.00563679766771E-016, 0.000000000000000 ) )
#245 = ORIENTED_EDGE( '', *, *, #368, .T. )
#246 = ORIENTED_EDGE( '', *, *, #369, .T. )
#247 = ORIENTED_EDGE( '', *, *, #370, .T. )
#248 = ORIENTED_EDGE( '', *, *, #371, .T. )
#249 = ORIENTED_EDGE( '', *, *, #372, .T. )
#250 = ORIENTED_EDGE( '', *, *, #373, .T. )
#251 = ORIENTED_EDGE( '', *, *, #374, .T. )
#252 = ORIENTED_EDGE( '', *, *, #375, .T. )
#253 = ORIENTED_EDGE( '', *, *, #376, .T. )
#254 = ORIENTED_EDGE( '', *, *, #377, .T. )
#255 = ORIENTED_EDGE( '', *, *, #378, .T. )
#256 = ORIENTED_EDGE( '', *, *, #379, .T. )
#257 = ORIENTED_EDGE( '', *, *, #364, .F. )
#258 = ORIENTED_EDGE( '', *, *, #380, .F. )
#259 = ORIENTED_EDGE( '', *, *, #381, .F. )
#260 = ORIENTED_EDGE( '', *, *, #382, .F. )
#261 = CARTESIAN_POINT( '', ( -35.6107784431138, 80.8239520958084, 0.000000000000000 ) )
#262 = DIRECTION( '', ( 0.000000000000000, 0.000000000000000, 1.00000000000000 ) )
#263 = DIRECTION( '', ( 1.00000000000000, 0.000000000000000, 0.000000000000000 ) )
#264 = ORIENTED_EDGE( '', *, *, #382, .T. )
#265 = ORIENTED_EDGE( '', *, *, #383, .F. )
#266 = ORIENTED_EDGE( '', *, *, #384, .F. )
#267 = ORIENTED_EDGE( '', *, *, #365, .T. )
#268 = CARTESIAN_POINT( '', ( -35.6107784431138, 80.8239520958084, 8.00000000000000 ) )
#269 = DIRECTION( '', ( 1.00000000000000, 1.30922526488816E-016, 0.000000000000000 ) )
#270 = DIRECTION( '', ( -1.30922526488816E-016, 1.00000000000000, 0.000000000000000 ) )
#271 = ORIENTED_EDGE( '', *, *, #380, .T. )
#272 = ORIENTED_EDGE( '', *, *, #367, .F. )
#273 = ORIENTED_EDGE( '', *, *, #385, .F. )
#274 = ORIENTED_EDGE( '', *, *, #386, .T. )
#275 = CARTESIAN_POINT( '', ( 102.389221556886, -25.1760479041916, 8.00000000000000 ) )
#276 = DIRECTION( '', ( -1.00000000000000, 0.000000000000000, 0.000000000000000 ) )
#277 = DIRECTION( '', ( 0.000000000000000, 0.000000000000000, 1.00000000000000 ) )
#278 = ORIENTED_EDGE( '', *, *, #381, .T. )
#279 = ORIENTED_EDGE( '', *, *, #386, .F. )
#280 = ORIENTED_EDGE( '', *, *, #387, .F. )
#281 = ORIENTED_EDGE( '', *, *, #383, .T. )
#282 = CARTESIAN_POINT( '', ( -35.6107784431138, -25.1760479041916, 8.00000000000000 ) )
#283 = DIRECTION( '', ( 0.000000000000000, 1.00000000000000, 0.000000000000000 ) )
#284 = DIRECTION( '', ( 0.000000000000000, 0.000000000000000, 1.00000000000000 ) )
#285 = ORIENTED_EDGE( '', *, *, #388, .F. )
#286 = ORIENTED_EDGE( '', *, *, #389, .F. )
#287 = ORIENTED_EDGE( '', *, *, #390, .F. )
#288 = ORIENTED_EDGE( '', *, *, #391, .F. )
#289 = ORIENTED_EDGE( '', *, *, #392, .T. )
#290 = ORIENTED_EDGE( '', *, *, #393, .T. )
#291 = ORIENTED_EDGE( '', *, *, #394, .T. )
#292 = ORIENTED_EDGE( '', *, *, #395, .T. )
#293 = ORIENTED_EDGE( '', *, *, #396, .T. )
#294 = ORIENTED_EDGE( '', *, *, #397, .T. )
#295 = ORIENTED_EDGE( '', *, *, #398, .T. )
#296 = ORIENTED_EDGE( '', *, *, #399, .T. )
#297 = ORIENTED_EDGE( '', *, *, #366, .T. )
#298 = ORIENTED_EDGE( '', *, *, #384, .T. )
#299 = ORIENTED_EDGE( '', *, *, #387, .T. )
#300 = ORIENTED_EDGE( '', *, *, #385, .T. )
#301 = CARTESIAN_POINT( '', ( -35.6107784431138, 80.8239520958084, 8.00000000000000 ) )
#302 = DIRECTION( '', ( 0.000000000000000, 0.000000000000000, 1.00000000000000 ) )
#303 = DIRECTION( '', ( 1.00000000000000, 0.000000000000000, 0.000000000000000 ) )
#304 = ORIENTED_EDGE( '', *, *, #388, .T. )
#305 = ORIENTED_EDGE( '', *, *, #368, .F. )
#306 = CARTESIAN_POINT( '', ( -5.61077844311378, -20.1760479041916, 0.000000000000000 ) )
#307 = DIRECTION( '', ( 0.000000000000000, 0.000000000000000, -1.00000000000000 ) )
#308 = DIRECTION( '', ( 0.000000000000000, 1.00000000000000, 0.000000000000000 ) )
#309 = ORIENTED_EDGE( '', *, *, #399, .F. )
#310 = ORIENTED_EDGE( '', *, *, #379, .F. )
#311 = CARTESIAN_POINT( '', ( -16.1107784431138, 50.3239520958084, 8.00000000000000 ) )
#312 = DIRECTION( '', ( 0.000000000000000, 0.000000000000000, 1.00000000000000 ) )
#313 = DIRECTION( '', ( 0.000000000000000, -1.00000000000000, 0.000000000000000 ) )
#314 = ORIENTED_EDGE( '', *, *, #389, .T. )
#315 = ORIENTED_EDGE( '', *, *, #369, .F. )
#316 = CARTESIAN_POINT( '', ( -5.61077844311377, 75.8239520958085, 0.000000000000000 ) )
#317 = DIRECTION( '', ( 0.000000000000000, 0.000000000000000, -1.00000000000000 ) )
#318 = DIRECTION( '', ( 0.000000000000000, 1.00000000000000, 0.000000000000000 ) )
#319 = ORIENTED_EDGE( '', *, *, #390, .T. )
#320 = ORIENTED_EDGE( '', *, *, #370, .F. )
#321 = CARTESIAN_POINT( '', ( 72.3892215568863, 75.8239520958085, 0.000000000000000 ) )
#322 = DIRECTION( '', ( 0.000000000000000, 0.000000000000000, -1.00000000000000 ) )
#323 = DIRECTION( '', ( 0.000000000000000, 1.00000000000000, 0.000000000000000 ) )
#324 = ORIENTED_EDGE( '', *, *, #391, .T. )
#325 = ORIENTED_EDGE( '', *, *, #371, .F. )
#326 = CARTESIAN_POINT( '', ( 72.3892215568862, -20.1760479041916, 0.000000000000000 ) )
#327 = DIRECTION( '', ( 0.000000000000000, 0.000000000000000, -1.00000000000000 ) )
#328 = DIRECTION( '', ( 0.000000000000000, 1.00000000000000, 0.000000000000000 ) )
#329 = ORIENTED_EDGE( '', *, *, #392, .F. )
#330 = ORIENTED_EDGE( '', *, *, #372, .F. )
#331 = CARTESIAN_POINT( '', ( -16.1107784431138, 59.3239520958084, 8.00000000000000 ) )
#332 = DIRECTION( '', ( 0.000000000000000, 0.000000000000000, 1.00000000000000 ) )
#333 = DIRECTION( '', ( 0.000000000000000, -1.00000000000000, 0.000000000000000 ) )
#334 = ORIENTED_EDGE( '', *, *, #393, .F. )
#335 = ORIENTED_EDGE( '', *, *, #373, .F. )
#336 = CARTESIAN_POINT( '', ( -16.1107784431138, -3.67604790419161, 8.00000000000000 ) )
#337 = DIRECTION( '', ( 0.000000000000000, 0.000000000000000, 1.00000000000000 ) )
#338 = DIRECTION( '', ( 0.000000000000000, -1.00000000000000, 0.000000000000000 ) )
#339 = ORIENTED_EDGE( '', *, *, #394, .F. )
#340 = ORIENTED_EDGE( '', *, *, #374, .F. )
#341 = CARTESIAN_POINT( '', ( -16.1107784431138, 5.32395209580840, 8.00000000000000 ) )
#342 = DIRECTION( '', ( 0.000000000000000, 0.000000000000000, 1.00000000000000 ) )
#343 = DIRECTION( '', ( 0.000000000000000, -1.00000000000000, 0.000000000000000 ) )
#344 = ORIENTED_EDGE( '', *, *, #395, .F. )
#345 = ORIENTED_EDGE( '', *, *, #375, .F. )
#346 = CARTESIAN_POINT( '', ( -16.1107784431138, 14.3239520958084, 8.00000000000000 ) )
#347 = DIRECTION( '', ( 0.000000000000000, 0.000000000000000, 1.00000000000000 ) )
#348 = DIRECTION( '', ( 0.000000000000000, -1.00000000000000, 0.000000000000000 ) )
#349 = ORIENTED_EDGE( '', *, *, #396, .F. )
#350 = ORIENTED_EDGE( '', *, *, #376, .F. )
#351 = CARTESIAN_POINT( '', ( -16.1107784431138, 23.3239520958084, 8.00000000000000 ) )
#352 = DIRECTION( '', ( 0.000000000000000, 0.000000000000000, 1.00000000000000 ) )
#353 = DIRECTION( '', ( 0.000000000000000, -1.00000000000000, 0.000000000000000 ) )
#354 = ORIENTED_EDGE( '', *, *, #397, .F. )
#355 = ORIENTED_EDGE( '', *, *, #377, .F. )
#356 = CARTESIAN_POINT( '', ( -16.1107784431138, 32.3239520958084, 8.00000000000000 ) )
#357 = DIRECTION( '', ( 0.000000000000000, 0.000000000000000, 1.00000000000000 ) )
#358 = DIRECTION( '', ( 0.000000000000000, -1.00000000000000, 0.000000000000000 ) )
#359 = ORIENTED_EDGE( '', *, *, #398, .F. )
#360 = ORIENTED_EDGE( '', *, *, #378, .F. )
#361 = CARTESIAN_POINT( '', ( -16.1107784431138, 41.3239520958084, 8.00000000000000 ) )
#362 = DIRECTION( '', ( 0.000000000000000, 0.000000000000000, 1.00000000000000 ) )
#363 = DIRECTION( '', ( 0.000000000000000, -1.00000000000000, 0.000000000000000 ) )
#364 = EDGE_CURVE( '', #400, #401, #402, .T. )
#365 = EDGE_CURVE( '', #403, #401, #404, .T. )
#366 = EDGE_CURVE( '', #405, #403, #406, .T. )
#367 = EDGE_CURVE( '', #405, #400, #407, .T. )
#368 = EDGE_CURVE( '', #408, #408, #409, .T. )
#369 = EDGE_CURVE( '', #410, #410, #411, .T. )
#370 = EDGE_CURVE( '', #412, #412, #413, .T. )
#371 = EDGE_CURVE( '', #414, #414, #415, .T. )
#372 = EDGE_CURVE( '', #416, #416, #417, .T. )
#373 = EDGE_CURVE( '', #418, #418, #419, .T. )
#374 = EDGE_CURVE( '', #420, #420, #421, .T. )
#375 = EDGE_CURVE( '', #422, #422, #423, .T. )
#376 = EDGE_CURVE( '', #424, #424, #425, .T. )
#377 = EDGE_CURVE( '', #426, #426, #427, .T. )
#378 = EDGE_CURVE( '', #428, #428, #429, .T. )
#379 = EDGE_CURVE( '', #430, #430, #431, .T. )
#380 = EDGE_CURVE( '', #432, #400, #433, .T. )
#381 = EDGE_CURVE( '', #434, #432, #435, .T. )
#382 = EDGE_CURVE( '', #401, #434, #436, .T. )
#383 = EDGE_CURVE( '', #437, #434, #438, .T. )
#384 = EDGE_CURVE( '', #403, #437, #439, .T. )
#385 = EDGE_CURVE( '', #440, #405, #441, .T. )
#386 = EDGE_CURVE( '', #440, #432, #442, .T. )
#387 = EDGE_CURVE( '', #437, #440, #443, .T. )
#388 = EDGE_CURVE( '', #444, #444, #445, .T. )
#389 = EDGE_CURVE( '', #446, #446, #447, .T. )
#390 = EDGE_CURVE( '', #448, #448, #449, .T. )
#391 = EDGE_CURVE( '', #450, #450, #451, .T. )
#392 = EDGE_CURVE( '', #452, #452, #453, .T. )
#393 = EDGE_CURVE( '', #454, #454, #455, .T. )
#394 = EDGE_CURVE( '', #456, #456, #457, .T. )
#395 = EDGE_CURVE( '', #458, #458, #459, .T. )
#396 = EDGE_CURVE( '', #460, #460, #461, .T. )
#397 = EDGE_CURVE( '', #462, #462, #463, .T. )
#398 = EDGE_CURVE( '', #464, #464, #465, .T. )
#399 = EDGE_CURVE( '', #466, #466, #467, .T. )
#400 = VERTEX_POINT( '', #468 )
#401 = VERTEX_POINT( '', #469 )
#402 = LINE( '', #470, #471 )
#403 = VERTEX_POINT( '', #472 )
#404 = LINE( '', #473, #474 )
#405 = VERTEX_POINT( '', #475 )
#406 = LINE( '', #476, #477 )
#407 = LINE( '', #478, #479 )
#408 = VERTEX_POINT( '', #480 )
#409 = CIRCLE( '', #481, 1.62100000000000 )
#410 = VERTEX_POINT( '', #482 )
#411 = CIRCLE( '', #483, 1.62100000000000 )
#412 = VERTEX_POINT( '', #484 )
#413 = CIRCLE( '', #485, 1.62100000000000 )
#414 = VERTEX_POINT( '', #486 )
#415 = CIRCLE( '', #487, 1.62100000000000 )
#416 = VERTEX_POINT( '', #488 )
#417 = CIRCLE( '', #489, 3.32350000000000 )
#418 = VERTEX_POINT( '', #490 )
#419 = CIRCLE( '', #491, 3.32350000000000 )
#420 = VERTEX_POINT( '', #492 )
#421 = CIRCLE( '', #493, 3.32350000000000 )
#422 = VERTEX_POINT( '', #494 )
#423 = CIRCLE( '', #495, 3.32350000000000 )
#424 = VERTEX_POINT( '', #496 )
#425 = CIRCLE( '', #497, 3.32350000000000 )
#426 = VERTEX_POINT( '', #498 )
#427 = CIRCLE( '', #499, 3.32350000000000 )
#428 = VERTEX_POINT( '', #500 )
#429 = CIRCLE( '', #501, 3.32350000000000 )
#430 = VERTEX_POINT( '', #502 )
#431 = CIRCLE( '', #503, 3.32350000000000 )
#432 = VERTEX_POINT( '', #504 )
#433 = LINE( '', #505, #506 )
#434 = VERTEX_POINT( '', #507 )
#435 = LINE( '', #508, #509 )
#436 = LINE( '', #510, #511 )
#437 = VERTEX_POINT( '', #512 )
#438 = LINE( '', #513, #514 )
#439 = LINE( '', #515, #516 )
#440 = VERTEX_POINT( '', #517 )
#441 = LINE( '', #518, #519 )
#442 = LINE( '', #520, #521 )
#443 = LINE( '', #522, #523 )
#444 = VERTEX_POINT( '', #524 )
#445 = CIRCLE( '', #525, 1.62100000000000 )
#446 = VERTEX_POINT( '', #526 )
#447 = CIRCLE( '', #527, 1.62100000000000 )
#448 = VERTEX_POINT( '', #528 )
#449 = CIRCLE( '', #529, 1.62100000000000 )
#450 = VERTEX_POINT( '', #530 )
#451 = CIRCLE( '', #531, 1.62100000000000 )
#452 = VERTEX_POINT( '', #532 )
#453 = CIRCLE( '', #533, 3.32350000000000 )
#454 = VERTEX_POINT( '', #534 )
#455 = CIRCLE( '', #535, 3.32350000000000 )
#456 = VERTEX_POINT( '', #536 )
#457 = CIRCLE( '', #537, 3.32350000000000 )
#458 = VERTEX_POINT( '', #538 )
#459 = CIRCLE( '', #539, 3.32350000000000 )
#460 = VERTEX_POINT( '', #540 )
#461 = CIRCLE( '', #541, 3.32350000000000 )
#462 = VERTEX_POINT( '', #542 )
#463 = CIRCLE( '', #543, 3.32350000000000 )
#464 = VERTEX_POINT( '', #544 )
#465 = CIRCLE( '', #545, 3.32350000000000 )
#466 = VERTEX_POINT( '', #546 )
#467 = CIRCLE( '', #547, 3.32350000000000 )
#468 = CARTESIAN_POINT( '', ( 102.389221556886, 80.8239520958084, 0.000000000000000 ) )
#469 = CARTESIAN_POINT( '', ( -35.6107784431138, 80.8239520958084, 0.000000000000000 ) )
#470 = CARTESIAN_POINT( '', ( 102.389221556886, 80.8239520958084, 0.000000000000000 ) )
#471 = VECTOR( '', #548, 1000.00000000000 )
#472 = CARTESIAN_POINT( '', ( -35.6107784431138, 80.8239520958084, 8.00000000000000 ) )
#473 = CARTESIAN_POINT( '', ( -35.6107784431138, 80.8239520958084, 8.00000000000000 ) )
#474 = VECTOR( '', #549, 1000.00000000000 )
#475 = CARTESIAN_POINT( '', ( 102.389221556886, 80.8239520958084, 8.00000000000000 ) )
#476 = CARTESIAN_POINT( '', ( 102.389221556886, 80.8239520958084, 8.00000000000000 ) )
#477 = VECTOR( '', #550, 1000.00000000000 )
#478 = CARTESIAN_POINT( '', ( 102.389221556886, 80.8239520958084, 8.00000000000000 ) )
#479 = VECTOR( '', #551, 1000.00000000000 )
#480 = CARTESIAN_POINT( '', ( -5.61077844311378, -18.5550479041916, 0.000000000000000 ) )
#481 = AXIS2_PLACEMENT_3D( '', #552, #553, #554 )
#482 = CARTESIAN_POINT( '', ( -5.61077844311377, 77.4449520958085, 0.000000000000000 ) )
#483 = AXIS2_PLACEMENT_3D( '', #555, #556, #557 )
#484 = CARTESIAN_POINT( '', ( 72.3892215568863, 77.4449520958084, 0.000000000000000 ) )
#485 = AXIS2_PLACEMENT_3D( '', #558, #559, #560 )
#486 = CARTESIAN_POINT( '', ( 72.3892215568862, -18.5550479041916, 0.000000000000000 ) )
#487 = AXIS2_PLACEMENT_3D( '', #561, #562, #563 )
#488 = CARTESIAN_POINT( '', ( -12.7872784431138, 59.3239520958084, 0.000000000000000 ) )
#489 = AXIS2_PLACEMENT_3D( '', #564, #565, #566 )
#490 = CARTESIAN_POINT( '', ( -12.7872784431138, -3.67604790419161, 0.000000000000000 ) )
#491 = AXIS2_PLACEMENT_3D( '', #567, #568, #569 )
#492 = CARTESIAN_POINT( '', ( -12.7872784431138, 5.32395209580840, 0.000000000000000 ) )
#493 = AXIS2_PLACEMENT_3D( '', #570, #571, #572 )
#494 = CARTESIAN_POINT( '', ( -12.7872784431138, 14.3239520958084, 0.000000000000000 ) )
#495 = AXIS2_PLACEMENT_3D( '', #573, #574, #575 )
#496 = CARTESIAN_POINT( '', ( -12.7872784431138, 23.3239520958084, 0.000000000000000 ) )
#497 = AXIS2_PLACEMENT_3D( '', #576, #577, #578 )
#498 = CARTESIAN_POINT( '', ( -12.7872784431138, 32.3239520958084, 0.000000000000000 ) )
#499 = AXIS2_PLACEMENT_3D( '', #579, #580, #581 )
#500 = CARTESIAN_POINT( '', ( -12.7872784431138, 41.3239520958084, 0.000000000000000 ) )
#501 = AXIS2_PLACEMENT_3D( '', #582, #583, #584 )
#502 = CARTESIAN_POINT( '', ( -12.7872784431138, 50.3239520958084, 0.000000000000000 ) )
#503 = AXIS2_PLACEMENT_3D( '', #585, #586, #587 )
#504 = CARTESIAN_POINT( '', ( 102.389221556886, -25.1760479041916, 0.000000000000000 ) )
#505 = CARTESIAN_POINT( '', ( 102.389221556886, -25.1760479041916, 0.000000000000000 ) )
#506 = VECTOR( '', #588, 1000.00000000000 )
#507 = CARTESIAN_POINT( '', ( -35.6107784431138, -25.1760479041916, 0.000000000000000 ) )
#508 = CARTESIAN_POINT( '', ( -35.6107784431138, -25.1760479041916, 0.000000000000000 ) )
#509 = VECTOR( '', #589, 1000.00000000000 )
#510 = CARTESIAN_POINT( '', ( -35.6107784431138, 80.8239520958084, 0.000000000000000 ) )
#511 = VECTOR( '', #590, 1000.00000000000 )
#512 = CARTESIAN_POINT( '', ( -35.6107784431138, -25.1760479041916, 8.00000000000000 ) )
#513 = CARTESIAN_POINT( '', ( -35.6107784431138, -25.1760479041916, 8.00000000000000 ) )
#514 = VECTOR( '', #591, 1000.00000000000 )
#515 = CARTESIAN_POINT( '', ( -35.6107784431138, 80.8239520958084, 8.00000000000000 ) )
#516 = VECTOR( '', #592, 1000.00000000000 )
#517 = CARTESIAN_POINT( '', ( 102.389221556886, -25.1760479041916, 8.00000000000000 ) )
#518 = CARTESIAN_POINT( '', ( 102.389221556886, -25.1760479041916, 8.00000000000000 ) )
#519 = VECTOR( '', #593, 1000.00000000000 )
#520 = CARTESIAN_POINT( '', ( 102.389221556886, -25.1760479041916, 8.00000000000000 ) )
#521 = VECTOR( '', #594, 1000.00000000000 )
#522 = CARTESIAN_POINT( '', ( -35.6107784431138, -25.1760479041916, 8.00000000000000 ) )
#523 = VECTOR( '', #595, 1000.00000000000 )
#524 = CARTESIAN_POINT( '', ( -3.98977844311378, -20.1760479041916, 8.00000000000000 ) )
#525 = AXIS2_PLACEMENT_3D( '', #596, #597, #598 )
#526 = CARTESIAN_POINT( '', ( -3.98977844311376, 75.8239520958085, 8.00000000000000 ) )
#527 = AXIS2_PLACEMENT_3D( '', #599, #600, #601 )
#528 = CARTESIAN_POINT( '', ( 74.0102215568863, 75.8239520958085, 8.00000000000000 ) )
#529 = AXIS2_PLACEMENT_3D( '', #602, #603, #604 )
#530 = CARTESIAN_POINT( '', ( 74.0102215568862, -20.1760479041916, 8.00000000000000 ) )
#531 = AXIS2_PLACEMENT_3D( '', #605, #606, #607 )
#532 = CARTESIAN_POINT( '', ( -16.1107784431138, 56.0004520958084, 8.00000000000000 ) )
#533 = AXIS2_PLACEMENT_3D( '', #608, #609, #610 )
#534 = CARTESIAN_POINT( '', ( -16.1107784431138, -6.99954790419160, 8.00000000000000 ) )
#535 = AXIS2_PLACEMENT_3D( '', #611, #612, #613 )
#536 = CARTESIAN_POINT( '', ( -16.1107784431138, 2.00045209580840, 8.00000000000000 ) )
#537 = AXIS2_PLACEMENT_3D( '', #614, #615, #616 )
#538 = CARTESIAN_POINT( '', ( -16.1107784431138, 11.0004520958084, 8.00000000000000 ) )
#539 = AXIS2_PLACEMENT_3D( '', #617, #618, #619 )
#540 = CARTESIAN_POINT( '', ( -16.1107784431138, 20.0004520958084, 8.00000000000000 ) )
#541 = AXIS2_PLACEMENT_3D( '', #620, #621, #622 )
#542 = CARTESIAN_POINT( '', ( -16.1107784431138, 29.0004520958084, 8.00000000000000 ) )
#543 = AXIS2_PLACEMENT_3D( '', #623, #624, #625 )
#544 = CARTESIAN_POINT( '', ( -16.1107784431138, 38.0004520958084, 8.00000000000000 ) )
#545 = AXIS2_PLACEMENT_3D( '', #626, #627, #628 )
#546 = CARTESIAN_POINT( '', ( -16.1107784431138, 47.0004520958084, 8.00000000000000 ) )
#547 = AXIS2_PLACEMENT_3D( '', #629, #630, #631 )
#548 = DIRECTION( '', ( -1.00000000000000, -1.00563679766771E-016, 0.000000000000000 ) )
#549 = DIRECTION( '', ( 0.000000000000000, 0.000000000000000, -1.00000000000000 ) )
#550 = DIRECTION( '', ( -1.00000000000000, -1.00563679766771E-016, 0.000000000000000 ) )
#551 = DIRECTION( '', ( 0.000000000000000, 0.000000000000000, -1.00000000000000 ) )
#552 = CARTESIAN_POINT( '', ( -5.61077844311378, -20.1760479041916, 0.000000000000000 ) )
#553 = DIRECTION( '', ( 0.000000000000000, 0.000000000000000, 1.00000000000000 ) )
#554 = DIRECTION( '', ( 0.000000000000000, 1.00000000000000, 0.000000000000000 ) )
#555 = CARTESIAN_POINT( '', ( -5.61077844311377, 75.8239520958085, 0.000000000000000 ) )
#556 = DIRECTION( '', ( 0.000000000000000, 0.000000000000000, 1.00000000000000 ) )
#557 = DIRECTION( '', ( 0.000000000000000, 1.00000000000000, 0.000000000000000 ) )
#558 = CARTESIAN_POINT( '', ( 72.3892215568863, 75.8239520958085, 0.000000000000000 ) )
#559 = DIRECTION( '', ( 0.000000000000000, 0.000000000000000, 1.00000000000000 ) )
#560 = DIRECTION( '', ( 0.000000000000000, 1.00000000000000, 0.000000000000000 ) )
#561 = CARTESIAN_POINT( '', ( 72.3892215568862, -20.1760479041916, 0.000000000000000 ) )
#562 = DIRECTION( '', ( 0.000000000000000, 0.000000000000000, 1.00000000000000 ) )
#563 = DIRECTION( '', ( 0.000000000000000, 1.00000000000000, 0.000000000000000 ) )
#564 = CARTESIAN_POINT( '', ( -16.1107784431138, 59.3239520958084, 0.000000000000000 ) )
#565 = DIRECTION( '', ( 0.000000000000000, 0.000000000000000, 1.00000000000000 ) )
#566 = DIRECTION( '', ( 1.00000000000000, 0.000000000000000, 0.000000000000000 ) )
#567 = CARTESIAN_POINT( '', ( -16.1107784431138, -3.67604790419161, 0.000000000000000 ) )
#568 = DIRECTION( '', ( 0.000000000000000, 0.000000000000000, 1.00000000000000 ) )
#569 = DIRECTION( '', ( 1.00000000000000, 0.000000000000000, 0.000000000000000 ) )
#570 = CARTESIAN_POINT( '', ( -16.1107784431138, 5.32395209580840, 0.000000000000000 ) )
#571 = DIRECTION( '', ( 0.000000000000000, 0.000000000000000, 1.00000000000000 ) )
#572 = DIRECTION( '', ( 1.00000000000000, 0.000000000000000, 0.000000000000000 ) )
#573 = CARTESIAN_POINT( '', ( -16.1107784431138, 14.3239520958084, 0.000000000000000 ) )
#574 = DIRECTION( '', ( 0.000000000000000, 0.000000000000000, 1.00000000000000 ) )
#575 = DIRECTION( '', ( 1.00000000000000, 0.000000000000000, 0.000000000000000 ) )
#576 = CARTESIAN_POINT( '', ( -16.1107784431138, 23.3239520958084, 0.000000000000000 ) )
#577 = DIRECTION( '', ( 0.000000000000000, 0.000000000000000, 1.00000000000000 ) )
#578 = DIRECTION( '', ( 1.00000000000000, 0.000000000000000, 0.000000000000000 ) )
#579 = CARTESIAN_POINT( '', ( -16.1107784431138, 32.3239520958084, 0.000000000000000 ) )
#580 = DIRECTION( '', ( 0.000000000000000, 0.000000000000000, 1.00000000000000 ) )
#581 = DIRECTION( '', ( 1.00000000000000, 0.000000000000000, 0.000000000000000 ) )
#582 = CARTESIAN_POINT( '', ( -16.1107784431138, 41.3239520958084, 0.000000000000000 ) )
#583 = DIRECTION( '', ( 0.000000000000000, 0.000000000000000, 1.00000000000000 ) )
#584 = DIRECTION( '', ( 1.00000000000000, 0.000000000000000, 0.000000000000000 ) )
#585 = CARTESIAN_POINT( '', ( -16.1107784431138, 50.3239520958084, 0.000000000000000 ) )
#586 = DIRECTION( '', ( 0.000000000000000, 0.000000000000000, 1.00000000000000 ) )
#587 = DIRECTION( '', ( 1.00000000000000, 0.000000000000000, 0.000000000000000 ) )
#588 = DIRECTION( '', ( 0.000000000000000, 1.00000000000000, 0.000000000000000 ) )
#589 = DIRECTION( '', ( 1.00000000000000, 0.000000000000000, 0.000000000000000 ) )
#590 = DIRECTION( '', ( 1.30922526488816E-016, -1.00000000000000, 0.000000000000000 ) )
#591 = DIRECTION( '', ( 0.000000000000000, 0.000000000000000, -1.00000000000000 ) )
#592 = DIRECTION( '', ( 1.30922526488816E-016, -1.00000000000000, 0.000000000000000 ) )
#593 = DIRECTION( '', ( 0.000000000000000, 1.00000000000000, 0.000000000000000 ) )
#594 = DIRECTION( '', ( 0.000000000000000, 0.000000000000000, -1.00000000000000 ) )
#595 = DIRECTION( '', ( 1.00000000000000, 0.000000000000000, 0.000000000000000 ) )
#596 = CARTESIAN_POINT( '', ( -5.61077844311378, -20.1760479041916, 8.00000000000000 ) )
#597 = DIRECTION( '', ( 0.000000000000000, 0.000000000000000, 1.00000000000000 ) )
#598 = DIRECTION( '', ( 1.00000000000000, 0.000000000000000, 0.000000000000000 ) )
#599 = CARTESIAN_POINT( '', ( -5.61077844311377, 75.8239520958085, 8.00000000000000 ) )
#600 = DIRECTION( '', ( 0.000000000000000, 0.000000000000000, 1.00000000000000 ) )
#601 = DIRECTION( '', ( 1.00000000000000, 0.000000000000000, 0.000000000000000 ) )
#602 = CARTESIAN_POINT( '', ( 72.3892215568863, 75.8239520958085, 8.00000000000000 ) )
#603 = DIRECTION( '', ( 0.000000000000000, 0.000000000000000, 1.00000000000000 ) )
#604 = DIRECTION( '', ( 1.00000000000000, 0.000000000000000, 0.000000000000000 ) )
#605 = CARTESIAN_POINT( '', ( 72.3892215568862, -20.1760479041916, 8.00000000000000 ) )
#606 = DIRECTION( '', ( 0.000000000000000, 0.000000000000000, 1.00000000000000 ) )
#607 = DIRECTION( '', ( 1.00000000000000, 0.000000000000000, 0.000000000000000 ) )
#608 = CARTESIAN_POINT( '', ( -16.1107784431138, 59.3239520958084, 8.00000000000000 ) )
#609 = DIRECTION( '', ( 0.000000000000000, 0.000000000000000, -1.00000000000000 ) )
#610 = DIRECTION( '', ( 0.000000000000000, -1.00000000000000, 0.000000000000000 ) )
#611 = CARTESIAN_POINT( '', ( -16.1107784431138, -3.67604790419161, 8.00000000000000 ) )
#612 = DIRECTION( '', ( 0.000000000000000, 0.000000000000000, -1.00000000000000 ) )
#613 = DIRECTION( '', ( 0.000000000000000, -1.00000000000000, 0.000000000000000 ) )
#614 = CARTESIAN_POINT( '', ( -16.1107784431138, 5.32395209580840, 8.00000000000000 ) )
#615 = DIRECTION( '', ( 0.000000000000000, 0.000000000000000, -1.00000000000000 ) )
#616 = DIRECTION( '', ( 0.000000000000000, -1.00000000000000, 0.000000000000000 ) )
#617 = CARTESIAN_POINT( '', ( -16.1107784431138, 14.3239520958084, 8.00000000000000 ) )
#618 = DIRECTION( '', ( 0.000000000000000, 0.000000000000000, -1.00000000000000 ) )
#619 = DIRECTION( '', ( 0.000000000000000, -1.00000000000000, 0.000000000000000 ) )
#620 = CARTESIAN_POINT( '', ( -16.1107784431138, 23.3239520958084, 8.00000000000000 ) )
#621 = DIRECTION( '', ( 0.000000000000000, 0.000000000000000, -1.00000000000000 ) )
#622 = DIRECTION( '', ( 0.000000000000000, -1.00000000000000, 0.000000000000000 ) )
#623 = CARTESIAN_POINT( '', ( -16.1107784431138, 32.3239520958084, 8.00000000000000 ) )
#624 = DIRECTION( '', ( 0.000000000000000, 0.000000000000000, -1.00000000000000 ) )
#625 = DIRECTION( '', ( 0.000000000000000, -1.00000000000000, 0.000000000000000 ) )
#626 = CARTESIAN_POINT( '', ( -16.1107784431138, 41.3239520958084, 8.00000000000000 ) )
#627 = DIRECTION( '', ( 0.000000000000000, 0.000000000000000, -1.00000000000000 ) )
#628 = DIRECTION( '', ( 0.000000000000000, -1.00000000000000, 0.000000000000000 ) )
#629 = CARTESIAN_POINT( '', ( -16.1107784431138, 50.3239520958084, 8.00000000000000 ) )
#630 = DIRECTION( '', ( 0.000000000000000, 0.000000000000000, -1.00000000000000 ) )
#631 = DIRECTION( '', ( 0.000000000000000, -1.00000000000000, 0.000000000000000 ) )
ENDSEC
END-ISO-10303-21
